# Supplementary material for: A Framework for Classification of Prokaryotic Protein Kinases
Source: PubMed Central journal article supplement (PMC2877116; doi:10.1371/journal.pone.0010608), 2010-05-26
Supplement: pone.0010608.s003.pdf [file pone.0010608.s003.pdf]

**Multiple sequence alignments of clusters**

This file contains multiple sequence alignments of clusters (generated by Clustalw2) which have 4 or more members (only catalytic kinase domain). First column in multiple sequence alignment of any cluster represents GI number of protein.

Cluster No. 1 multiple sequence alignment

CLUSTAL 2.0.10 multiple sequence alignment

```
113476443      YKLTQKIYESPNLSLVFQGLLKPN--NQPIILKFLKENYPTPSELTRYKQEYEITRSLNKR
113477314      YKLTQKIYESPNLSLVFQGLLKPN--NQPIILKFLKENYPTPSELTRYKQEYEITRSLNKR
17130246      YQLIEQLYHGSKTLVYRGIRRTDSAAQPVVIKLLQREYPSFSELLQFRNQYTIAKNLNIP
83312035      YRLTEEVYSAGNTRVCRAVSLAD--GKPVILKILSGEQLSPDAFARYQREYEITSSLAEV
*: *  :::* .  :: *  :::  .:  *:::***.  :  :  .  :  ::::*  *  :  .*
```

```
113476443      EQIIIVYDLHRYNNSLVILLEDFFGGKSLKLLLPQTQFTLEEFLLTIAIQITKGLAVIHTNN
113477314      EQIIIVYDLHRYNNSLVILLEDFFGGKSLKLLLPQTQFTLEEFLLTIAIQITKGLAVIHTNN
17130246      G-IVHPTSLEPYGNSYALVMEDFFGGVSLGSYSQTHPLSLGDVLAIAIQLANILHDLYQNR
83312035      EGVTTVLAMENVQDSVMIVQEDVGGTSLARILEAGRLDLEEALALAVRITQILGRIHRHR
:      :.  :*  :: **.* **      : *  : *:::*****  *  :: :.
```

```
113476443      I IHKDINPSNIIYNPQTGQLKIIDFGISTRLSQEFIKVFPPHQLEGLTAYIAPEQTGRMN
113477314      I IHKDINPSNIIYNPQTGQLKIIDFGISTRLSQEFIKVFPPHQLEGLTAYIAPEQTGRMN
17130246      VIHKDIKPANLLIHPETKEIKLIDFSIASLLPKETEAVKHPKVLEGLTAYLAPEQTGRMN
83312035      VIHKDFNPTNIIWNRQTGTVRVIDFGISSQLSQERAEFQSVKQLEANLAYASPEQTGRVN
:****:::***: : : *  :::***.*: : *.*  .  : **..***  :*****:*
```

```
113476443      RGIDYRSDFYALGVTTFYELLTNQLPFETNDSIELVHCHIAQQPLPPHKLNPINPSLSNI
113477314      RGIDYRSDFYALGVTTFYELLTNQLPFETNDSIELVHCHIAQQPLPPHKLNPINPSLSNI
17130246      RGIDYRSDFYAFGVTTFELLTGKLPFISDDPLELVHCHIAKPAPSVCALRPEIPAVIGEI
83312035      RALDSRSDLYSLGVTLYQMLTGTLPFLSRGGIELVHAHIALMPPPPHEVSHGIPPILSQI
*.*  ***:*::***:*****.  ***  :  .  :*****.***  .  .  :  **  :.*
```

```
113476443      I IKLLAKSPEERYQNALGIEADLKKCLSOL
113477314      I IKLLAKSPEERYQNALGIEADLKKCLSOL
17130246      I GKLMAKNAEDRYQSALGLQYD-----
83312035      VMRLMAKMADDRYQSARGLEHDLQ-----
:  :***  .::***.*  *:: *
```

Cluster No. 2 multiple sequence alignment

CLUSTAL 2.0.10 multiple sequence alignment

```
17130231 YQNLTLQIYAGTRTLVYRGIREEDQKPIVIKMLRYEYPSFSELVQFRNQYTTITKNLHISGI
17133824 YRITEQLYFGSKTIVYRGLRKQDQKPVVIKLMRNEYPTFQEI AQFRNQYTTITKDL DIPGI
17130054 YNINEELYHGSRTL VYRGYREVDQ QAVVVKLLKNPYP SFNELL LFRNQYTTIAKNLNSPLI
17130055 YSISEELYNGSRTQVYGGYREVDQ QPVVIKLLKNPYP SFNELL LFRNQYTTIAKNLNSPLI
17129699 YAISEELYNGSRTL VYRAVREVDCLPVVIKLLKNHYPSFSELVQFRNQYTTIAKNLDYPGI
17132690 YHISSQLYAGSKTRVYRAIREQDQRPVVIKLLASDYPNFHELLQFRNQYTTISKNLNVTGI
17135445 YQISSQIYAGSKSRVYRATREQDTLTVIIKVL TSEYPSFNELLQFRNQYTTISKNLNVTGI
113475755 YQITQEIYTGTSKSVYRGINTITQ QPVVIKVLKKEYPTFSELLQFRHQYTTITKNLNLAVG
17131374 YQIVEKIYDSANSEVYRSIRQEDNQSVIIKVLKQ EYPTPIELTRYKQ EYEITRNLD FDGV
17131349 YQIIELIGEGVKTNVYHAISIPDSKLVVIKILKTEY PELKDIAALKHEYELIKNL DIPGV
24195011 YEIKDRMNTDSSTEYKAVRSKDKTEVVVKYIPI LDELHPAVVNL RNEYEILSYLSSEKM
* : . : ** . : : * : : : * : *
```

```
17130231 IKTYSLENYENS YALVMEDFGG VSLKDW SIQNSE-----ISLDEFFHIAIQIVTILDGLY
17133824 VKPLSLETYRNS YALVMEDFGGL SLKDWGQI SKDGN EYGTVLKRFFHIAIAIASTLES LH
17130054 VQYTSLEPCNGY ALVMEDFGG ISLKEWGTRETQ-----QSLEEF LMIAIALCNILDLLY
17130055 VQNY SLEPYQNGY ALVMEDFGG ISLKWGTRETQ-----QSLEEF LVIAIALCDIFNLLY
17129699 IKTYSLEPLQNGY QLVMEDFGG ISVKDYFANN NV-----ASLEKFLQIAIALCDILDILY
17132690 IRPLSLETYGN GYILVMEDTGGI ALREY- IKTTP-----FPLVEFLAIAIQITNILQELH
17135445 THPLSLDVYGN SYILVMKDTGGI SLRQY- TETAK-----LTLIEFLAIAIQITNILHGLH
113475755 AKPLSLEKYGN GYALIMEDI GAVSLNTYLSNQKL-----NLQKFL ELAISMV EILEGLY
17131374 IKAYSLEPYR TLVII LEDFGGTDLRDFHN INSI-----EKFLAIAIKITDTLAQIH
17131349 VKAHGF EKYNCFALVLE EFDGTS LHKVIQEKKIG-----LLDFCKIGIQITQALGELH
24195011 IRAFGMEKIPE GFILILEFV PGOQLKHF SOKRPVN-----LKDFFKIAIDLAEKLG EIH
: : : . : : : . : *
```

```
17130231 RSRVIHKDIKPS NILINPITKEIRLIDFGI ASLLPRETQTLTSPNVLEGLT LAYLSPEQTG
17133824 RSRIIHKDIKPA NILINPTTLEIRVTD FSIATLLPREVQVLTNHN VLEGLT LAYLSPEQTG
17130054 HQRIIHKDIKPS NILINPQTQVKLIDFSI ASLLPRETQTLVNP NVLEGLT LAYLSPEQTG
17130055 HERIIHKDIKPS NILINPETQQVKLIDFSI ASLLPRETQTLVNP NVLEGLT LAYLSPEQTG
17129699 RERIIHKDIKPA NILINPKTTQVKLIDFSI ASLLPRETQTLINP NVLEGLT LAYLSPEQTG
17132690 LNRVIHKDIKPA NILIHPQTQVKLIDFSI ASLLPKETQEI RSPNVLEGLT LAYLSPEQTG
17135445 QNRVIHKDIKPA NILINPHTKQVELIDFSI ASLLPKETQEI KSPNILEGLT LAYLSPEQTG
113475755 HHQIIHKDIKPS NILINPDTGDVKLIDFGI STLLTRETQEVINPN ILEGLT LAYLSPEQTG
17131374 AANVIHKDI NPSNIVFNPKTGEVKI IDFGIATVFTRENTTLKHP NVLEGLT LAYLSPEQTG
17131349 RKYIIHKDIK PONIIVNLETHQVKI IDFSISSLLFQEKAKLNNPNLLEGLT IAYMSPEQTG
24195011 NKKVIHKDLK PDNII FNPDENILRIVDFGI STRLSKEESSWSNPNRLEGS IHVVSPEQTG
:****: : * : : : : : : * : : : : : : : *
```

```
17130231 RMNRGIDYRSDF YSLGVTFFELLTGQLP FYCDDPMKLLHCHIAKRPPQVHDINSTIPLAV
17133824 RMNRGIDYRSDF YSLGVTFFELLTGQLP FMTIEPMELVYCHIAKQPPKASDINPKIPTIL
17130054 RMNRGIDYRTDF YSLGVTFFYELLTGGLP FASNDPIELVHSHI AKIAPLAHEINSEIPSVL
17130055 RMNRVVDYRTDF YSLGITFFYELLTGELP FASNDAMELVHSHI AKTVPLAHEINLDIPSVI
17129699 RMNRGIDYRTDF YSLGATFFYELLTGTL PFPSEDA MELVHCHLAKAATLVHETNTTIPSVL
17132690 RMNRGIDYRSDF YSLGVTLYELLMGELP FSDDPMELVHCHIAK-TPIALGHQQH IPLVL
17135445 RMNRGV DYRSDF YSLGVTFFYELLTGELP FNSNDPMELVHSHIAK-QPNKF-NPESIPQVI
113475755 RMNRGIDYRSDF YSLGITFFYEMLTQKLP FVSSDPIELVYFHIAKEPTPPANLNKEIPLMV
17131374 RMNRALDYRTDF YSLGVTFFYELLTKQLP FDTTDSLELVYCHLAKQPIPPHEIHSNIPKTL
17131349 RMNRSIDYRTDF YSLGVTFFYEMLTGQLP FIVTDPMELVHCHIAKQPI SINQLIPEIPEVV
24195011 RMNRSVDYRSDF YSLGITFFYELLTGKLP FESEDLLELVHFHLAKSPVDPKRIRSEIPEAL
**** : : : : : : : * : : : : : : : * : *
```

```
17130231 SNIAFKLMAKNAEDRYQSALGLKHDLE-----
17133824 SDLISKLMAKNAEDRYQSAYGLAYDLE-----
17130054 SKIVSKLMEKNAEDRYQSALGLKFD-----
```

|           |                                    |
|-----------|------------------------------------|
| 17130055  | SEIIRKLVAKNAEDRYQSALGLKFD-----     |
| 17129699  | SDIVNKLMKNAEDRYQSALGLKYD-----      |
| 17132690  | SDIIMKLMKNAEDRYQSALGLKHDLE-----    |
| 17135445  | SDIVMKLMKNAEDRYQSALGLKHDLE-----    |
| 113475755 | NNIILKMIAKNAEERYQNAIGLKHDLO-----   |
| 17131374  | SDIVMKLMAKTAEERYQSALGIKADL-----    |
| 17131349  | SEIIMKLLSKTAEERYQSALGIKADLEKCLNQL- |
| 24195011  | SHVILKLLSKTAEERYQTSEGLKNDLEIIRDKWL |
|           | ..: *:: *.**:*:*..: *: *           |

Cluster No. 3 multiple sequence alignment

CLUSTAL 2.0.10 multiple sequence alignment

```
108757395      FIPLKLLGQGGMGAVFAAYDPDLDRKVALKLLSVE-ARSADEEGGRARLLREAQAMARVS
108761044      YFLLKRLGQGGMGVVYAAYDPDLDRKVALKLLHAD-SRTDSEE-ARARLLREAQAMARVS
108761750      YHILDTLGAGGMGAVYSAYDPELHRRVAIKLLHPD-ANPAARSDGSSRLLREAQAMARLS
108757860      YVVQQRIGRGAMGEVYAAHDPELDRRVALKLLRPE-GRH--LEELRLRLLREAQALARLA
108763079      YVVRECLGAGAMGIVYAADDPELGRRVALKVLRPK-GSQ--REELQORLLREAQALARLS
108763872      YVVLGLLGEGGMGRVHVAYDPELDRKVALKLLKPERFHEDSLALARQRLEREARTMAKLS
108764042      YVVLGLLGEGGMGRVHAAAYDPELDRKVALKLLNLARLGEDSLAQARQLEREARTMARLS
      :          :* *.** *. * **:* *:*:*:*:*          ** ***:::*:::
```

```
108757395      HPNVIPIYEVGTWDTQVFFTMIEWVAGGTLADWRREKLRSWREVLEKYLOAGRGLEAAHAA
108761044      HPNVIPIFDVDVWGDRVFLAMELVDGGTLASWVKEGORSWREILESFLAAGRGLQAAHEA
108761750      HPNVVSVYDAGTFAGRVFIAMERVDGLSLRHVLAERHTWREVLDIFRQAGRGLAAAHAA
108757860      HPHVVTVYDVGVCEDCVFLALELVEGASLAEWLEAP-RPWQDVVRVFDAGRGLAAAHAA
108763079      HPNVVTLYDVGAYGDGVFLTMELVEGTTLAEWMKER-RPWKEVLRVFLVLEAGKGLAAAHAA
108763872      HPHIASLHDVGEYQGQLFLVMEFLEGGTLRRWLTEQPRPLREVLERFRQAADGLAASHAL
108764042      HPHVAQLHDVGEFQGQLFLVMEFLEGGTLRRWLAEKPRTRREILARFTQAADGLAATHAL
      **:: :..... :*:::* : * :* *   *. :::: : *. ** *:*
```

```
108757395      GLVHRDFKPANVLVGRDGRVYVDFGLARPVDNLPLDEQ---PTLARVRDASETSRTLHD
108761044      GLVHRDFKPANVLVNKAGRVFVDFGLARPVGTLPKKEEP---LSEDAEALIPSERRMLDT
108761750      GLVHRDFKPANVLVSKDGRAQVDFGLARTTADLDAEAGRGTTPALPRLAPED--LLQT
108757860      GLVHRDFKPGNVLVGKDGRRVDFGLAR----PSHRGVSGHAAASLDTVTAPASLVDS
108763079      GLVHRDFKPANALIGKDGRRVDFGLIAR----LLQQ----EEGASHQEHIEAPVTPTGR
108763872      GIVHRDFKPDNVLLTKGGLVRITDFGLAN-----ATL---VPGTAAPGTVSPA
108764042      GI IHRDFKPDNVLLTRDGQVRITDFGLAN-----AAVGMGPPREDAAIDSCEA
      *::***** *.*: : * . :*****:*
```

```
108757395      PLTETGVVLGTPPFMSPEQFRGESLDPRSDQFSFCAALYRALYNQRPFPDELSRAAKAL
108761044      PLTEAGLIIGTPSYMSPEQFRGDDLDPRSDQFSFCVALYWALYRQRPFEPAKMEAYASSR
108761750      ALTEAGLVMGTPAYMPPEQHEDGRIDARGDQFSFCASLYEALYQLPFNKRPEDYLEEA
108757860      PLTHSGALLGTPAYMAPEQLQGHGVDARSQFSFCVALYEALHGVRPFEGRTLEALGQAA
108763079      -LTRTGQLLGTTPAYIAPELVRGQRADARSDEFSSFCVALHEALFGARPFQGETLQEVVLA
108763872      SLTVTGTLLGTLAYGAPEQLRGEHGDARSQFSFCVALYEALNGQRPFEKGTREALLEQV
108764042      PLTVTGAFLGTPAYGAPEQLRGERGDARSQFAFCVALYEALNGQRPFAGATREELLASM
      ** :* .:** .: .** .. *.*.*:*:*:*:*: ** ** .
```

```
108757395      R-----SAPAKVTAPLERAGREPS-----IHEPPSDARVPAWVRRRAVMRGLSLEPE
108761044      KPQAQPVVEATEPLNVTAPLEREAPKPLPPPVLIQEPPRDVKVPAWVKQAMMRGLSLDPA
108761750      R-----AGR-----VRPPPRGSRVPTWVLRVAVTRGLSPAPE
108757860      R-----EGR-----IRAPERESKIPARVRRRAVLRGLRAQPE
108763079      Q-----QGR-----MSPPKREVKVPTRVRRRAVFRGLSAKPE
108763872      A-----R-----KAVRPERAGVPAWLRVRRRGLSADPA
108764042      Q-----R-----QEVPRPEQRGVPSWLKAVVRRRGLSVDPS
      **: : .: *** *
```

```
108757395      ARFASMGALLEAL-
108761044      ARFASMEALLGAL-
108761750      ARFPSMGVLLDAL-
108757860      ERFPSMEALLTELA
108763079      DRFPTMQSLLAAL-
108763872      ERFSSMEVLRARLS
108764042      RRFESMQVLRARLA
      ** :* * *
```

Cluster No. 4 multiple sequence alignment

CLUSTAL 2.0.10 multiple sequence alignment

28855779 YRIERLLGAGGMGAVYRAKDLLSEQFGEPDPYVALKILSEEFASPASALLYSEFALTR  
28872524 YRIERLLGAGGMGAVYRAKDLLSEQFGEPDPYVALKILSEEFASPASALLYSEFALTR  
9947642 YRLERMLGAGGMGTVYRARDLLHEQFGDPAPLVALKLLNESVAESPASALLYSEFALTR  
104779802 YRLERLLGAGGMGRVYRARDLLQERFGDPQLLALKLMSDQLATAPDANALLFNEYALTS  
\*\*:\*:\*:\*:\*:\*:\* \*:\*:\*:\* \*:\*:\* \* :\*:\*:\*:\*:\*:\* \*:\*:\*:\*:\*:\*:\*:\*:\*:\*

28855779 RLRHNNVLRRLHSFEVDTCQRAFITMELMRGLTLDKLLCERPLGLPWRELRIALSLLDA  
28872524 RLRHNNVLRRLHSFEVDTCQRAFITMELMRGLTLDKLLCERPLGLPWRELRIALSLLDA  
9947642 RLRHPNVVRLFTFDVDTACQRAYIVMELMPGLPLDRLLCERPEGLPWSELSAIARPLLDV  
104779802 RLRHPNLVRLQGFVAVDPESDRGFITMELMRGTSLDRLLCDQPMGLAWAQVREIAVPLLDV  
\*\*\*\* \*:\*:\* \* \*\* . :\*:\*:\*:\*:\* \* .\*:\*:\*:\*:\* \* \* .\* : \* \* .\*\*\*\*.

28855779 LAYSHARGVLHGDMKPSNVMLSEEGVRLFDGFLGQAEQVMPGLPHLSRERFNAWTPGYA  
28872524 LAYSHARGVLHGDMKPSNVMLSEEGVRLFDGFLGQAEQVMPGLPHLSRERFNAWTPGYA  
9947642 LAYVHEQGVHLGDLKPSNVMLGEEGVRLFDGFLGQAGILGDLPLQLSRGRIDAWTPGYA  
104779802 LACVHAQGVVHGDGLKPSNVMLTDDGLRFLFDGFLGMALEGPLAGLPHLSHGRFEAWTPAYA  
\*\* \* :\*:\*:\*:\*:\*:\* \* :\*:\*:\*:\* \* \* : \*:\*:\*:\* \* :\*:\*:\*.\*

28855779 APELLEGQALSASADVGVACVIFELAGGKHPFRRLPSTQARDERLERELKAPRNLPKHC  
28872524 APELLEGQALSASADVGVACVIFELAGGKHPFRRLPSTQARDERLERELKAPRNLPKHC  
9947642 APELLEGAPLSPAADLYALACVLYELADGRHPFRRLPSNQAREQGLERQLRAPRHLPRRC  
104779802 APELFEGGTPSTASDLYAVACVLYELVTGRHPFDRVLSLKAREQGLQHALRVPENMPAKA  
\*\*\*\*:\* \* . \* . :\*:\*:\*:\*:\*:\*:\* \* . \*:\* \* \* :\*:\*:\* \* :\* :\* .\* . :\* \* .

28855779 WPALRSALRFDAQDRKITAKQLRDAF  
28872524 WPALRSALRFDAQDRKITAKQLRDAF  
9947642 WPALRTALSLDPERRCIGVRELQEAL  
104779802 WTALRTALVFDPGQRSIGAAQLRDAF  
\* .\*\*\*\*:\* \* :\* . \* \* . :\*:\*:\*:



Cluster No. 6 multiple sequence alignment

CLUSTAL 2.0.10 multiple sequence alignment

121592911 FVVHECIHAGGMAHIYRVGYANASRDPGFPMAMKIPRMTAGDGAENIVGFLEVELTILPTL  
121610423 FRVRECLHAGGMAHIYTVDYAQAGRSPGFAMAMKIPRMTAGDGAENIVSFLEVELQILPVL  
120612910 FVVHECLHAGGMAHIYRVSCADPAQDPGFPLVMKVPRMTAGDGAENIVGFLEVELQILPAL  
86160117 FRIGERFHAGGMGVIYRVT----GPDPGFPMIMKIPRLGPGEPASSVISFVEVEQTVLAAL  
115525927 FVIEDRIHQGGMATLLIVR----RPDQSMPMVMKLPKIGEGEDPAAIVSFEMEQMIMPRL  
27353958 YTIGECVHAGGMATLWTVT----HPGIDVPLLKIPRVSEGEDPAAIVSFEMEMMILPRL  
124268216 FRLEEHLHQGGMANLWRVT----HPDHAQPMLMKLPRIKGGEDPATIVGFVEVEQMILPRL  
13475495 FELVEKLPSGGMASLWRAT----NPRYDFPLVLKIPFLDPGADVSVILGFEAELILKRL  
: : : . \*\*\*. : . . : : \* \* : \* : : \* \* \* : : \*

121592911 SGHHAPRFVAAGDLMLRPLVMEYVQGDTLQHWLDDRPPGDTAARSAETIARIGGAMALA  
121610423 TGPHVPRFVAAGDLLRLPYLMEYIPGQTLQHWIDAPERSDSS-----TIARLGTAVAHA  
120612910 QGPHAPRFVAAGDLARLPYLAMEYVEGDTLQHRLDAGHRPGAD-----DIARLGAAMALA  
86160117 KGPHVPRFVAAGDLERQPYLMEEVGRSLKEWVGDEPVLDE-----VVRIGIALATA  
115525927 SGPHVPAYVAAGDFAQPYIVMERIAGKALLSRLPELPLPYAD-----AVDIAARIAAA  
27353958 AGPHVPSFCGTGDFAHQAYVVIERIPGTTLYKRLADLPLPYEE-----ARLLVAKIATA  
124268216 QGPHVPRYVAQGDFTAQPYLMEQLPGESLRPRLDRAPLPIDE-----VVTIGAKVATA  
13475495 SGPHVPRFAASGSLAQVPYIAMEFVVGKGLADIVGNAPLPMDE-----VARIGIEIATA  
\* \* . \* . \* . : . \* : : \* \* : : : : \* \* : : \* \* \*

121592911 AHSIHQQNVCHLDLKPANVLLRPDG-----SVVLLDFGLSCHAHYPDLLAEEMRQAVGSP  
121610423 AHSLHQNVCHLDLKPANVLRDDG-----SAVLLDFGLSCHAHYPDLLAEEMRQAVGSP  
120612910 AHSLHQNVCHLDLKPANVLLRPDG-----SAVLLDFGLSFHAHYPDLLAEEMREAVGSP  
86160117 LHDLHQQEAIHLDLKPANVFRPTG-----EAVLVDFGLAHHAHYPDLLAEEFRRPIGSA  
115525927 LADLHRQHVIIHDIKPSNIMFRESG-----EAVLLDYGLACSDVLPDLMQEEFRLPYGTA  
27353958 LADLHRQNVIIHDIKPSNIMFRESG-----EAVLIDYGLSHHNLPLDLLQEEFRLPYGTA  
124268216 LHDLHRQHVIIHLDVKPSNIFRRAADGSEAEAVLVDFGLSRHDHLPDLLDEEFTLPMGTG  
13475495 LAALHRQKVVHLDLKPENVLANRG-----AVLLDFGLARHEELPDFLGAESSVPMGTA  
: \* : \* . \* \* : \* : \* : \* : \* : \* : \* : \* : \* : \* : \* : \* : \* : \* : \* : \* : \*

121592911 TWIAPEQVVGVRGDLRSDIFAIGVMLYEMATGELPFGSPTTQGGMRQRLWMTAPPQRQYR  
121610423 AWIAPEQVVGVRGDRSDIFAIGVMLYELATGELPFGAPGTRSGMRQRLWMTAPPQRQHR  
120612910 AWIAPEQVVGVRGDLRSDVFAIGVMLYELATGELPFGAPATRGGLRQRLWVTPRPPRQHR  
86160117 PYIAPEQVVGARS DPRSDLFALGVVLYELATGRLPFGAPTPPGGLRRRLYRDPTPPRALV  
115525927 PYMAPERLLGVRDDPRSDLFALGVLLYFFTTGERPFGGETETMYGMRRRLWRDPPPPRKLK  
27353958 PYMAPERLLGVRDDPRSDLFSLGVLLYFFTTGERPFGGETLRAMRRRLWRDPHPPRALR  
124268216 PYMSPEQIQFVRDEPRSDLYALGVMLYHLTTGERPFGQPTS IAGLRQRLYREPVPPRVL R  
13475495 AYISPEQVLGERSDPASDLFALGCILFQLATGEEPFGPATLAGMKRRLYHAPRSPRDIN  
. : : \* : \* : \* : \* : \* : \* : \* : \* : \* : \* : \* : \* : \* : \* : \* : \* : \* : \*

121592911 PDLPEWLQEVILRCLEPEAAQRYPSAAHLAF---  
121610423 ADIPPWLQEVILRCLEPEAANRYPSAAHLAF---  
120612910 PDIPPWLQEVILRCLEPEAAQRYPSAAQLAF---  
86160117 PALPEWFQELVLRCLPEPDAGRRHASAAQVAF---  
115525927 PDYPPWLQEVVMRCLEIEPAWRYPTAAQLLFDL-  
27353958 ADYPPWLQEVVLRCLIEPVRRYPTASQLAFDL-  
124268216 PDCPPWLQEILLRCLEPRADQRHDTAAQLAFDLM  
13475495 DAIPRWLEAIIKCMEVDRSQRYIEAAHILSDL-  
\* \* : : : \* : \* : \* : \* : \* : \* : \* : \* : \* : \* : \* : \* : \* : \* : \* : \*

Cluster No. 7 multiple sequence alignment

CLUSTAL 2.0.10 multiple sequence alignment

70606821 YKVIDVVGQGGNGYVVKAERESKYAIAKILSPENLSKS-----SFDTLFKESENLKE  
70606951 YRVIEVIGLGGNGYVMKVEKNGLLYAMKVLVSVNKFTNSLE-----HFDNLLKESENLEK  
15920911 YRVVSVIGSGSGYVLKAEKDNVYAVKVFSLSQLSRAQLTISASSSFDEMFKESSETLKQ  
15921136 YKISEIIGEGGGSYVLKGEKDNKYAIAKVLKVQPTKSQTVALR---DFIDLFKESNSLIE  
\*:: :\*: \*..\*:\* \*::: \*\*:::.. . . \* :\*\*\*\*:\* :

70606821 LSKNDKIVSIYGIYADSNYINSIIKGNAEAYFNYPPIIMFMDGGTIADLIN--EIRSS  
70606951 LSKDPRLVSIYGSFVDKNNIQSALAGDYTSYYKYPPAIIMFMEGGTFLDLISRVDLVQS  
15920911 LSRNPKFVTILGFYIDSNNIKSALKGDVNTYYNYPPAIVMEFMEGGTAKDLLT-TSIIYS  
15921136 LSNHEGLVKLFGIFVDINQIGSIMRGDGETYLRYPPIVMEFMEGGTVKDLLK--FYYPD  
\*\*.. :\*.: \* : \* \* \* \* : \* : \* .\*\*\*\*:\*:\*\*\*\*:\* \*\*:. .

70606821 PYFQYIVKAIIREVGLALKYLHKGRYVHLDVKPRNIFLSVIPKDEKLLLDQISSR-GII  
70606951 KYWQYIVKLVIKEIAKALTFLHKGRYVHLDVKPQNIIFLKEKINGEPEVVYKILSSTPGII  
15920911 TYWPLIVKEIIKEIAYALDFLHSGKGFVHLDVKPENIFFSRNLGNPPEIYKNISSS---I  
15921136 KKWYDLVRIILLRVSLALSHIHKSGYVHLDIKPQNIFFSETLPNNIADILSFLSVKQVQV  
: :\*: :. :. \*\* :\*. \*:\*\*\*\*:\*:\*\*\*\*:. : : . :\*

70606821 KLGDLGSAVRVGEKITQATPAYSPEQIEAVITGKGAQPSMDNYALGVTAYYLLTGNV-S  
70606951 KLGDLGSAVRVGEKITQATPAYSPEQIEAVITGKGAQPSMDNYALGVTLYKLLTMKN-L  
15920911 KLGDLGSAVRIGERFYQATPSYSPPEQIEAIIITGKGADPKMDIFALGMTAYVLLTGKNDN  
15921136 KLGDLGSATKIGGKITQITPEYSSPKQIENAILGLGATDMDIFSFGILAYHLLTGKVS  
\*\*\*\*\*.:\*: :. \* \*\* \*..\*:\* \* \* \* \* ..\*\* :\*: \* \*\*

70606821 PITKYVERAVDLYLQNKFNDALEEIDNSKKVLEGFKPSLPINTLPELNRVIOGTILSDPT  
70606951 DYVNYLDKAFDEYIKGDPSIAMKYINMAKMSMVNFKPKLPHNTLPELANVVQGLVVDPK  
15920911 PISDNLNKAIDAYMAGNVGEALKLIQNAKQILSSWRPILPQNTPELTRVIVYSININPL  
15921136 PTAKLIDETIELYNNNKIRDALLKIDEAKKVLSEWNIDLPSGVPLSLEEVVKGCIKG---  
. :\*.: \* .. \* : \* : \* : :. \*\* .. .\* .\* : :

70606821 KRLTSDDIVQIL  
70606951 RRLTSYDIVKIL  
15920911 SRPSAKQIVDLL  
15921136 KINSMEEIVKKL  
: :\*\*.\*



Cluster No. 8 multiple sequence alignment

CLUSTAL 2.0.10 multiple sequence alignment

```
13092623      YEVKGCIAHGGLGWVYLAFDHNVD----RPVVLKGLVHSGDAEAQASAVAERQFLAEVV
145220807      YEIKGCIAHGGLGWVYLAFDKNVD----RPVVLKGLVHSGDAEAQAIAMAERQFLAEVT
111019188      YEVQGCIAHGGLGWIYLAIDRNVSD----RWVVLKGLLHFGDAEAQAVAVAERQFLAEVA
54027318      YEIQGCLAHGGLGWIYLAIDRNVSD----RWVVLKGLLHAGDAEAQAVAVAERQFLAEVA
111020581      YEVLGCLAHGGLGWIYLAIDRNVSD----RWVVLKGLLHSGDPEAQEVALAERRFLAEVT
29831918      YEVVGCIAHGGLGWVYLAVDRAVSD----RWVVLKGLLDTGDQDAMAAAI SERRFLAEIE
86741120      YEIAGALAHGGQGWYIYLARDPSVAEG---SWVVLKGLLDSDGREAQAAAIAERRFLASVD
86741498      YTVHGVIAHGGLGWVYAATDDNLGGDGVRAWVVLKGLLDAANPEARRIAEGERRILTTVS
* : * :**** **: * * * :          *****: . .: :* * .**::* : :
```

```
13092623      HPQIVQIFNFVEHKDT-SGDPVGYIVMEYIGGRSLKGRS--KKNVEK-----LPVAEA
145220807      HPGIVKIYNFVEHEDK-HGNPVGIVMEYVGGTSLKQATLLKHSSRIR-----LPAAEA
111019188      HPSIVKIFNFVEHPRS-DGTPMGIVMEYVGGHSLRDVLSTHEKPER-----MPVEQA
54027318      HPSIVKIHNFVEHPGR-DGVPIGYIVMEYVGGRSLRALLDDHRRPQR-----MPVTEA
111020581      HPSIVKIYNFVEHPGM-DGNPIGYIVMEYVVRGRTLRLDLLTELKEDAGPDDPKPMLPVEHA
29831918      HANIVRIYNFVEHLDQRTGSLDGYIVMEYVGGKSLKEIANDRRPTPTGKRDP---LPVEQA
86741120      HPAIVRIFTFVEHAGT-----SYIVMEYIGGTSLREVLCRRRADAGRDPD---LPVTQA
86741498      HPGIVKILDYVTHHGE-----DYIVMEYVPGVSLAGLAEVGVAGPDGRSAP--PSAADV
*. **:* :* * .*****: * :* . . .
```

```
13092623      IAYLLEILPALSYLHSIGLVYNDLKPENIMLTEE--QLKLIDLGAVSRINSFG---CIYG
145220807      IGFMLEILPALGYLHSLGLVYNDLKPENIMVTED--QLKIIDLAVSRINSFG---YLYG
111019188      IAYVLEILPALAYLHSTGLVYNDLKPENIMVTED--ALKLIDLGAVAGIEDYG---YLYG
54027318      IAYLLEILPALEYLHSIGLAYNDLKPENIMVTED--QVKLIDLGAVTPLEAYG---NLYG
111020581      IRYLLEVTALGYLHSMGLVYNDLKPENIMIGDDYDQLKLIDMGAVARIGDHG---YIYG
29831918      CAYGIEALEALGHLHLSRNLLYCDFKVDNAIQTEN--QLKLIDMGAVRRMDDEES--AIYG
86741120      VAYLLAALPAFAYLHRNGLVFGDFTPDNVMLGRE--TPRLIDLDAIRRIDDGAVAGAGCG
86741498      IRYLLRVLPALGHLHRLGLVYCDLKPENVMVTAE--DVKLIDLGARRLDDRVS--GYLS
: : * : ** . * : * . : * : : : : : * : * . . .
```

```
13092623      TPGYQAPEIVRTG-----PTVATDIYTVGRTLAALTLN-LRTRNGRYMDGLP--E
145220807      TPGYQAPEIVRTG-----PTVATDIYTVGRTLAALTMR-LPTRKGRYLDGLP--E
111019188      TPGFQAPEIVKTG-----PTVASDIYTVGRTLAVLTLD-MPSDKGRYLDGIPDPE
54027318      TKGFQAPEIATG-----PTVATDIYTVGRTLAVLTLD-LPMEHGRYRDGIPDPD
111020581      TQGYQAPEIATG-----PTVASDIYTVGRTLAVVTLD-MPTAGGCYVDGLPTPE
29831918      TVGYQAPEVADV-----PSVASDLYTVARTLAVLTLD-FQGYTNVFDVSLPDPD
86741120      TLGYQAPEVPTG-----PSVASDLFVAVGRTLATLILD-FRGNTSTYLHTMPPAA
86741498      TPGYRAPELDDGERPAGIARTAPTVTDDIFAVARTLARLVLGRFPGFLGAYRHALPPRR
* *::***: *          *::*:***: * : : : . : . : *
```

```
13092623      DDPVLTYYDSFARLLHRAINPDPRRRFSSAEEMSAQLM
145220807      DNPVLEEYDSFGRLRRRAIDPDPRRRFQTAEELSSQL-
111019188      QAPLLAEYEFFHRLLLRATDPDPSRRFASAEEMAGQL-
54027318      QHQVLRREYEFFHRLLLCATDPDPARRFPSARAMSAQL-
111020581      EAPLLAEYEFYHRLLLRAIHPDPARRFASAEEMSTQL-
29831918      HIEVFRQYESFYRLLVRATDPDPVRRFASAQEMTEQL-
86741120      DHPVLARHESLYRFLKATAPDPDRRFTGAEEMHDELL
86741498      AHAPLRDFESLDRLLRRATATDPDQRFQSTTELADLV
: .: *:* * .** **: : : : *
```



Cluster No. 10 multiple sequence alignment

CLUSTAL 2.0.10 multiple sequence alignment

```

111023174      YRLRSKLG GGGMGAVWLARDTLLHRDVAIKQVTTTAG-LDPDE---ARRVRERTMREGRN
54022871      YRLQSKLG GGGMGAVWLAHDRLLDRDVAIKQVLSTAG-LPEAE---AARIREQIMHEGRV
134103120      YRVQRRIGSGAMGVVWECVDERLHRTVAVKQLLLQPG-LDPGE---AEEARQORAMREGRI
134103121      ---EQQIGSGAMGVVWRAVDERLHRTVAVKQLLLQPG-YTPEE---TEEARQORAMREGRI
54025161      YRLAERIGTGAMGVVWRATDERLQRVVAVKQLLLAPG-LTREQ---AQDAKQORAMREGRI
54023812      YRLVERIGSGGTGVVWRATDERLRRSVAIKQIHIQPS-LPEAE---RDIMRQORAIREARN
21223154      YRLGDVLGRGGMGTVWRAEDELTLGRTVAVKELRFPGN-IDEEE---KRRLITRTLREAKA
29831548      YRLGDVLGRGGMGTVWRAEDELTLGRTVAVKELRFPTS-IDEDE---KRRLITRTLREAKA
145593410     YRLLSPLGQGGMGRVVKARDEVLHRNVAIKELVPPPS-LTDEE---RREMRSLSREARA
29833120      YRLLSPLGEGGMGTVWRAHDEV LHREVAVKEVRAPAG-LPAAE---IERMYTRLEREAWA
21223156      YRLGEAIGSGMGRVWRAHDEV LHRTVAIKELTAALY-VSESD---QAILLARTRGEARA
29831550      YRLVDSIGSGMGRVWRAHDEV LHRAVAVKELTAALY-VSESD---RPRLARTNAEARA
21223285      YELLEPIGSGMGEVWKAHDRLLRRFVAVKGLLDRA-MTPDT---QKAAMQORAREAEA
29827516      FELEARLGGGGMGTVWRARDLLHRSVAVKEVRPPDVFDAEYDPDGAHLLRERVLEARA
29831551      YRLDARIGRGGMGTVWRATDQLLGRQVAVKEL-AFDTSLSDDEE---ARLQRERTLREARA
29831553      YRL LAKLGHGGMGTVWRAKDETVDREVAVKEPRVPDH-LPERE---RANVFERMREARA
145593389     YSLRSAVGN GGMGTVWRAADTLLRRDVAVKEVLPQG-LAPSD---RDAMYERTLREARA
86739075      YRLVARLGAGAMGTVWRAFDSVLETEAALKEIEFAGG-VAEAE---RADRVERALREARH
86740348      YRLVERIGSGGMGTVWRAHDDVLRVEVAIKEIRVSAD-LDDDE---RAAGVETAMREARN
29831162      YRLRLTLGAGGMGRVWLAYDAELACEVAVKEIALPDLPIDASE---PVQRIARARSEARN
86740837      YRLQDRLGAGGMGAVWRATDQMLRVDVALKEVSI PVD-STPGE---WTERIARARREGMN
134102348     YQVTGELGRGGMGIVWRAWDQVIGREVAIKELHLPDG-VPPAE---RQVYEERVLREART
86739395      YRLDTPIGRGGAGVWVRGEDELLQRPVAIKEILV PMA-GAONE---RDAIRARVLREARA
86739396      YRLDGVIGRGGFGVVHRATDELLQRVVAVKEVRLPLG-ENADE---RGLTRERVLREARA
134100369     YRMDSRIGTGAMGAVWAGTDVLLHRPVAVKEVRLSPR-VPEEE---AAEFREARALREARS
134102978     YRLSRLGGGAMGTVWSAIDELLRRPVAVKEVRLPPG-MPEEE---AAELRERARLEARA
119716210     YTLEREVGRGGMGAVWVLRDEV LGRQVALKRVGLAPG-VTTPD-----LARAEREARL
21222892      YRLLRGLSGGGMGRVYLGR-SAGRTVAVKIVHPHFA--LDEE-----FRARFRREVAA

```

\* \* \* \* \* . \* : \* \*

```

111023174      AAKLA-HSHSIAMYDVALEAG---EPWLVM EYLP-SRSLAQAMNIADTLPPLEVAQIGAQ
54022871      AAKLS-HEHAIAYDVVLEAG---EPWLVM EHL P-SRSVARALGLVDTL PVLEVAQIGAQ
134103120      AARLQ-HPHAISVYDVAEDEG---QPVLVM EYLP-STSLAAMMSEHG PLPPREVARIGAQ
134103121      AARLQ-HQNAIVVFDVAEDEG---QPVLVM EYLP-SQSLASVISEKGLVPPQQVARIGAQ
54025161      AARLH-HPHAITVFDVAEEDG---QPWLVM EYMP-APSLAAE IAGGRTLPPHQVADIGAQ
54023812      AARFQ-HPNAIVVFDITEHDG---DPCLVM EYLK-SRSLAAVLSAQGTLPLTQVARIGE Q
21223154      IARIR-NNSAVTVYDVVEEDD---RPWIVM ELVE-GKSLAEAIREDG LLEPRAAEVGLA
29831548      IARIR-NNSAVTVFDVVEDDN---RPWIVM ELVE-GKSLAEAIREDG LLEPKRAAEVGLA
145593410     IARLN-HVNVVRI FDLVLR TDG---DPWIVM EYVA-SKSLQDTLAEQGPVSPARAVQIGLG
29833120      AARVA-NRNVVTVYDV AHEDG---RPWIVM ELIR-GIALSDLLDAEGPLSPQRAAHIGAE
21223156      AARIN-HSAVTVHDVLEHDG---RPWIVM ELVE-GRSLADAVKEEERVDPREAARVGLW
29831550      AARIN-HSAVTVHDVLEHDN---RPWIVM ELVE-GGSLADAVKERGRVPEVAARIGLW
21223285      LAKIE-HQNVVTVHDQIETAD---QVWIVM K LLE-GRSLADLLSRDRV LGVPRAAEIGLQ
29827516      LARVE-HPNVVTIHHIVDGGEG-TYPWIVM ELVG-GGSLADRL-ARGPMPAEAAHIGRG
29831551      VAQLS-HPNIVVHDVVVDDE---RPYIVM ELIG-GGSLADRISADGPVDAREAA RIGID
29831553      AARLD-HPAVNVHDVA VVDG---RPWIVM ELVQ-GRSLGAAL-QEGTLGARETAKIGLE
145593389     AAIQ-HPAVVQVYDVVTEGG---RPWIVM ELLD-SRSLADMVIEDGPLAQRVVAKIGVS
86739075      AAKLRGHPHVVTILDVLENG---LPWIVM ELVP-SRSLFEVVRSDGPLPVAEVARIGTA
86740348      AARLRGNPHVVTVHDVAVEHDG---LPWIVM ELVR-AGTLATTVN RDGPLPPERAIQVGLA
29831162      AARLRGHPHVATVHDVVVHEG---LPWIVM EHV PDAIDLQAVVRRSGPLTPARTARIGVA
86740837      AARLRGHPGIVSVHDVVEDGG---LPWIVM DLIIPARSVADRLRSGGGLRPDETASIGAA
134102348     AGRLN-DPAVTVHDVLA EAG---TTYIVM ELVR-AVTLTELVAQRGPLAPEQAADLARQ
86739395      LARLH-SPAIVSVYDVVEHQ---RHWIIM ELVD-ADSLGDVIRNQGPLPFDQVAAIGLA
86739396      AGR LH-HPGAVAVLDVIDDGE---LPWIIM EYVD-GRSLATI INDRGPLPVEETCRIGIS

```

134100369 LAVVT-HPNVVMLYDVADDAG---GPFVVMELVP-AESLSSVLKRTR-LSHEQLAVFVDG  
134102978 IAVVT-HPNVVTLYDVAREAG---EPFVVMELVP-SQSLAAVLDEHGPLDDHQLALADG  
119716210 AARLN-HPHVAVYDLVIEGPDNTEQWLVMYVE-GSTLAELLRRDGAMTPDRAAAFLGQ  
21222892 ARRVG-GAWTAPVLDADPEAR---VPWVATAYAA-GPSLTAADVADGGPLPAHSVRALGAG

. : . : : : .

111023174 VADALTAAHAAGIVHRDIKPGNILVADRGR--ELGTVKISDFGIARAK-----GD  
54022871 VADALAAAHAVGIVHRDIKPGNILVADRGP--RVGFAKLSDFGISRGA-----GE  
134103120 VAAALGAAHAAGVHRDIKPGNILLGD-----NGTVKITDFGISRAQ-----GD  
134103121 VAGALAAAHMAGIVHRDLKPGNILLGD-----NGMAKITDFGISRAI-----GD  
54025161 AAAALAAHAAGIMHRDVKPNLLVG-----NGTVKITDFGISRAV-----GD  
54023812 VASALIAAHQAGIVHRDVKPGNVLLDD-----HGTVKITDFGISRAT-----GD  
21223154 VLDVLRSAHREGILHRDVKPSNVLIA-ED-----GRVVLTDGFIAQVE-----GD  
29831548 ILDVLRAAHREGILHRDVKPSNVLIA-ED-----GRVVLTDGFIAQVE-----GD  
145593410 VLGALKAAHKAGVMHRDVKPGNVLLG-ED-----GRVVLTDGFGLATVP-----GD  
29833120 VLAALRAAHTAGVLRDVKPGNVLMA-ND-----GRVVLTDGFIAQVE-----GS  
21223156 VLRALRAAHTAGVLRDVKPGNVLLA-DD-----GRVLLTDGFIAQIE-----GD  
29831550 VLRGLRAAHSAGVLRDVKPGNVLLA-TD-----GRVLLTDGFIAQVE-----GD  
21223285 MAQGLRAVHEASVLRDVKPGNVLVR-DG-----GQVVLVDFGIATFE-----GA  
29827516 VLAALRAAHAAGVQHRDVKPNVLLRPDG-----S-PVLTDFGIAAIR-----ES  
29831551 LLGALGRAHGAGVLRDLKPNVLLLEADS-----DRVVLTDGFIAQVA-----GA  
29831553 VLGALEAAHAAGILHRDVKPDNVLLG-RH-----DRVVLTDGFIAQIE-----GE  
145593389 LLGALEVAHAIGVLRDVKPNVLLIC-SD-----GRCVLTDFGVARMP-----TD  
86739075 VLDALVAARAHGIVHRDVKPSNVLIGTDG-----RVVLTDFGIATG-----DGD  
86740348 VLDALVAGQRMGVLHRDVKPSNILLADDG-----RVLLTDGFIAQTH-----AAD  
29831162 VLDALTAGHRIGILHRDVKPNILLAPDASGDPYARVLLTDYGIALQPE-----SRE  
86740837 VADALAFAHAKGVVHRDIKPGNILLAESG-----RALVTDFGIAAH-----NDD  
134102348 VLSALENAHAAGIVHRDVKPSNIMVADGR-----VKLADFGIAQT-----LDD  
86739395 LTDALAAAHSAAGVLRDVKPGNVLLGRDG-----RVRLTDGFIAATE-----GD  
86739396 LAYALEAAHRLGVVHRDVKPSNVLVTADG-----RARLTDGFIAVSQ-----GD  
134100369 VAAALQAAHRVGIHRDVKPGNVLLGKHG-----QVKLGDFGISRNA-----AE  
134102978 VASALEAAHRAGIVHRDVKPGNVLIGDDG-----RIKLSDFGISRNI-----SE  
119716210 AADALAAHAAGIVHRDVKPSNIVAPDG-----QVKLSDFGIARAE-----AD  
21222892 LGEALAAVHELGLVHRDVKPSNVLLTLDG-----PLLIDFGIARATGGTSPTQSGGGT

\* : .: \*\*:\* \*::: : \*:::

111023174 SADTTNGVITGTPAYFSPEVARGQDPTEA--SDVFLSGSTLYTVVEGQPPFGIDSDSIAL  
54022871 TSDEPDGIIITGTPAYLPPEVARGAQPTAA--SDVFLSGATLYTAIEGQPPFGMDDSDAV  
134103120 VQVTKTGMLAGTPAYLSPDVAMQOEPTPA--SDVFLSGATLYAAIEGRPPFGLNENTLAL  
134103121 VSVTKSGILAGTPAYLAPEVALGRDPAPA--SDVFLSGSTLYAAIEGEPFPGVDENAI SL  
54025161 VTVTATGFLAGTPAYLAPEVARGEDPSPA--SDVFALGATLYAAVEGAPPPFEGDNPLAV  
54023812 ATLTETGLICGTAAYLAPEVARGADPTPA--ADVFLSGATLFFHALEGEPPYGASANPLAV  
21223154 PSITSTGMLVGAPSYISPERARGHKPGPA--ADLWSLGGLLYAAVEGTPPYDRG-SAIAT  
29831548 PSITSTGMLVGAPSYISPERARGHKPGPA--ADLWSLGGLLYASVEGVPYDKG-SAIAT  
145593410 PNVTRTGMVLGSPAYIAPERARDGTAGPE--ADLWSLGATLYAAVEGKSPYART-SAIAT  
29833120 SALTMTGEVIGSPEFLAPERALGRTPGPE--SDLWSLGVLLYAAVEGNPFRHD-TPLST  
21223156 STITRTGEVVGSDYLAPERVRGHDPGGS--SDLWALGATLYTAVEGRSPFRRT-SPLTT  
29831550 TTITRTGEIVGSVDYLAPERVRGHDPGGS--SDLWALGATLYAAVEGKSPFRRT-SPLST  
21223285 DRVTRHGGIIGTPPYLAPELFAPAAPGPTSASDLWALGVTLYEMVEGRLPFGGN-EVWEV  
29827516 TTLTATGSIIGTPDYMAPERVTGDRGGPG--ADLWSLAMMLYVAVEGHPLRRG-TTLAT  
29831551 TTLTESGSFVGSPEYTAPERMSGVRTGPE--SDLWSLGALLCTVLSGESPFRRD-SLGGI  
29831553 TNLTDGTGGFVGSPEYIAPERVLGQRPGPA--SDLWSLGVLVLYAAAEGVSPFRRS-NTPAT  
145593389 VQLTTPGMVLGSPHFISPERAMQDFGPP--SDLFSLGVTLTYAVEGRPPFDKG-DPIET  
86739075 PTLT-VTGVLGTPYMAPERLNNQPATFE--ADLFLSGGTLYFAVEGRPPFERD-TFGAM  
86740348 PTLTGGIGSGGTPAYMAPERLLGGPATLA--GDLFALGATLYFAVEGVSPFQORD-TLPTT  
29831162 PRLTATAGILGTPGYLAPERARGEPTPA--ADLFLSGATLYATVEGRPFDRH-GEYAT  
86740837 SRMT-AAGVVGTIAYVAPERLGGQPADGR--SDVFLSGVTLYQMVEGRLPFQAD-TTAGL  
134102348 PRLTSSGAIVGSFSFMAPERIQQADASPA--GDLWSLGATLFFAVEGWMPFERQ-TTAAT  
86739395 VTLTGTGALVGSFAYIAPERVRGSSGTPA--SDLWGLGATLYSAVEGQPPFEGP-ETYAV  
86739396 PRLTSTGMVMGSPAYLPPERARGDAGSAA--GDRWGLGATLFTTVEGYPPFTGG-DPISV  
134100369 STLTRTGIVLGTTPAYVAPEIAQGEAPSPA--ADLWSLGATLYSAAHGRLPYESDSPLIT  
134102978 QTITRTGIMLGTPAFIAPEIASGDGVTAS--ADLWGLGATLFAAAEGRPPYDAGDDPVAT  
119716210 ASLTQTGLVTGSPAYLSPEVASGQATDA--SDVWSLGATLFFHALAGHPPYEVGDNLLGA  
21222892 ASLTSTGVSIGSPGYMSPEQILGKGVGTGA--ADVFLSGAVLAYATTGQPPFPGD-SSAAL

\*: : .\*: .\* :.\*. \* \* \*

111023174 LHRVAKAEIYRPSKAG-PLTDTLHLLEDPARRPTMAEARDAL---  
54022871 VQRAAMAQIIPPSRSG-VLTDALLHMMEPAPQRRPTMAEARDEI---  
134103120 LHAVAAGKVDPPQAG-PMADPLMAMMQRVEDRPMQVREML---  
134103121 LHRVARGQIEPPRQAG-PMTAALMQLLRPDPVDRPTMAQARNLL---  
54025161 LHAVARGEI PPPRRAG-PLAPVLMRLLAADPAARPSMPEAARAL---  
54023812 LYAAANGQVSQPRNAG-PATDFLLALLSPDPDDRPTMRVARDTL---  
21223154 LTAVMTENLEEPKNAG-PLRDVIYGLLTKDPDQRLDDAGARAMLNKV  
29831548 LTAVMTEPLEEPKNAG-PLRSVIYGLLAKDPEQRLDDAGARAMLNEV  
145593410 LAALATEPPPPPKNAG-PLRPVLNGLLRKDPDRITAEVAERLL---  
29833120 LRAVVDEELPPPFRAG-PLAPVIEGLLRKDPADRVPAEQAEQDL---  
21223156 MQAVVEEEATEPRYAG-ALAPVISALLRKDPAERPDATEAEHLL---  
29831550 MQAVVGEEPGAPQYAG-ALAPVITALLRKEPAERPGSDEAEQML---  
21223285 QANIQQAPDPVLRVYAG-PLGPVIQGLLTTDPDRRLDAAGAEEMLRDV  
29827516 LAAVLHDDVPHPVKAG-PLTPVLTRVLVRDPAARPDAAEFDRM----  
29831551 LHAVVDDIRPPAQAE-PILPVVRGLLERDPDRRLDAAEAARLL---  
29831553 LQSVLNATPAAPAAAKGTLAQVINGLLNKDPARRPNAAEVRRL---  
145593389 MHSVVEDPPAPPQSRG-PLVPVLMGKLEKDPDRRLPVHTARAML---  
86739075 LAAILLOPPAQHRAG-ELAAVLDGKLEKDPGRRMTPARAHLL---  
86740348 IGAVLHADPPPFLRGG-RLSAAIAGLLAKNPASRLRAEGAQALL---  
29831162 LTALLGEEPTPPVRAG-ELGAVLHGLLIKDPVRRLAPEAVARG----  
86740837 LSAILFEPPTVLAG-PLRPVLDAMLEKDPVVRDLAAAAARALASL  
134102348 LNAVNETPRATRPHG-VVGPVITGLLIADPKARFTAAQVRALL---  
86739395 LTAVVEGRRRAFRLAG-PLRNLLSDLMDRPAEERPVDVTEIRRRL---  
86739396 LAALVQGRRPQFRLAG-PLIPVIDDLMAPHEASRPPLTVVRRRL---  
134100369 LSAI IHGVPQHQMSG-PLGEVLSGLMVKDPARRMPLHEVRRRL---  
134102978 VTEVVRGPVPSSARPG-PVGEVIAGLMVKDPAERMPLTEVRRRM---  
119716210 LYRIVHEDPPRLPEAG-WLAPLLLATMCREPADRWSMARVRDVL---  
21222892 LYKVVHEEPNLDGLDDGELRELVASCLAKDPSARPAPAEVARRL---

: : \*

Cluster No. 11 multiple sequence alignment

CLUSTAL 2.0.10 multiple sequence alignment

1552570 YRLQRLIATGGMGQVWEAVDNRLGRRVAVKVLKSEF-SSDPEFIERFRAEARTTAMLNHP  
13879059 YRLQRLIATGGMGQVWEAVDNRLGRRVAVKVLKSEF-SSDPEFIERFRAEARTTAMLNHP  
31791192 YRLQRLIATGGMGQVWEAVDNRLGRRVAVKVLKSEF-SSDPEFIERFRAEARTTAMLNHP  
13092427 YRLHRLIATGGMGQVWEAVDSRLGRRVAVKVLKGEF-SSDPEFIERFRAEARTTAMLNHP  
120401052 YRLQRLIATGGMGQVWEGVDSRLGRRVAIKVLKAEY-STD AEFVERFRAEARTVAMLNHP  
145221405 YRLQRLIATGGMGQVWEGVDSRLGRRVAIKVLKAEY-STDSEFVERFRAEARTVAMLNHP  
126432629 YRLQRLIATGGMGQVWEAVDSRLGRRVAIKVLKAEY-STDPEFVERFRAEARTVAMLNHP  
111020684 YRLIRLIATGGMGQVWEATDNRLNRRVAVKVLKSEF-SSDPEFVERFRFEARTTAQLNHS  
54022045 YRLQRLIATGGMGQVWEALDTRLNRRVAVKVLKAEF-SADPTFRQFRTEAQTAAQLNHS  
134096663 YRLGQRIAVGGMGGEVWKATDVRLDRTVAIKVLKAEF-CGNAEFLHRFRTEARTTASLNHP  
19551292 YRLQWIIGHGGMSTVWLADDVNDREVAIKVLRPEF-SDNQEF LNRF RNEAQA AENIDSE  
23491869 YTLQWIVGHGGMSTVWLADDNVNDREVAIKVLRPEF-SDNTEFLSRFRNEARAAENIHSE  
38232690 YALQWVVGNGGMSTVWLADDLRNQREVAIKVLRPEF-SDNEEF LSRFRNEALASEHIDSD  
68535100 FELQWIIGRGGMSTVWL AHDVEQQRDVAVKILKPEY-TENEEFRARFRNEASAAQDL DSP  
116668589 FQLTTRIAIGGMGEVWKAKDLILGRIVA I KVLKEEY-TGDPGF LQRFRAEARHTALLNHV  
119963247 FQLTSRIAIGGMGEVWKAKDQILGRIVA I KVLKEEY-TGDPGF LQRFRAEARHTALLNHV  
28493744 YRLIARIAIGGMGEVWKAHDEVIQRHIA I KILKEEY-VGSRDF IERFRTEARHAAIVNHV  
119025057 YRLDSRLAQQGMGEVWKGYDIQLGRPVAIKALRGDLGVTQEAKLLRLRAEAHNSANLAHP  
23325796 YRLDSRLAQQGMGEVWKGYDIQLGREVAIKALRS DV-TNAEAKLRLRLRAEAHNSANLAHP  
119714295 YRLDSRIATGGMGGEVWRGTDTTLGRQVAVKLLKNEY-ADNPSFRTRFTEAQAHAASLHHP  
145592613 YRLDERIASGGMGDVWRGTDEV LGRTVAVKSLLPAL-LDDPDFAERFRGEARTMATINHP  
145594644 YRLDERIATGGMGDVWRGVLDLDRPVAVKVL LPAL-VCDFPGFITRFRSEARIMAALRHP  
21222257 YELGPVLGRGGMAEVYHAHDTRLGRQVAVKTLRADL-ARDPSFQARFRREAQSAASLNHP  
29830881 YELGHVLRGGMAEVH LAHDTRLGRTVAVKTLRADL-ARDPSFQARFRREAQSAASLNHP  
50841673 YELQNLIGRGGMADVWKARDHRLGRDVAVK KLRTDL-ASDDTFQARFQREQA SAARLNHP  
145592614 YQVGELIGYGGMAEVHRGRDLRLGRDVAIKMLRADL-ARDATFQMRFRREAQNAASLNHP  
22777192 YKIIKKIGGGGMANVYLARDTILERDVAVKALRMEY-IHQDEFIARFDREAQSATSLSHP  
119900063 FKILAKI ASGGTSTVYRGLDVRLDRPVALKVMSDRY-AGDEQFLTRFRLEARAVARLNHR  
2911096 YLVQAKIASGGTSTVYRGLDVRLDRPVALKVMSDRY-AGDEQFLTRFRLEARAVARLNHR  
13881919 YLVQAKIASGGTSTVYRGLDVRLDRPVALKVMDARY-AGDEQFLTRFRLEARAVARLNHR  
31793354 YLVQAKIASGGTSTVYRGLDVRLDRPVALKVMDARY-AGDEQFLTRFRLEARAVARLNHR  
116670115 YRVQSRLARGGMSTVYLATDQRLERDVALKVLHPHL-VNDGNFLDRLGREAKAAAKLSHA  
: : :. \*\* . \* . \* \* :\*: \* : \* : \*

1552570 GIASVHDYGESQMNNGE--RTAYLVMELVNGEPLNSVLKR-TGRLSLRHALDML EQTGRA  
13879059 GIASVHDYGESQMNNGE--RTAYLVMELVNGEPLNSVLKR-TGRLSLRHALDML EQTGRA  
31791192 GIASVHDYGESQMNNGE--RTAYLVMELVNGEPLNSVLKR-TGRLSLRHALDML EQTGRA  
13092427 GIASVHDYGESHMDGEG--RTAYLVMELVNGEPLNSVLKR-TGRLSLRHALDML EQTGRA  
120401052 GIAGVYDYGETDIDGEG--RTAYLVMELVNGEPLNSVIKR-TGRLSLRHALDML EQTGRA  
145221405 GIAGVYDYGETDIDGEG--RTAYLVMELVNGEPLNSVIKR-TGRLSLRHALDML EQTGRA  
126432629 GIASVYDYGETDMDGEG--RTAYLVMELVNGEPLNSVLKR-TGRLSLRHALDML EQTGRA  
111020684 GIAGIYDYGEVRDATGD--STAYLVMELVNGEPLNAVLSR-VGRLAVPHALDML EQTGRA  
54022045 GIAGIYDYGETYDPSAG--ETSYLVMELVQGEPLNAVLSR-LGKLSVNQGLDML EQTGRA  
134096663 GIAAVHDYGETAAIPDGPEDTAYLVMELVEGEPLAATLAR-EGRIKAEHALDML EQAGHA  
19551292 HVVATYDYREVPDP-AG-HTFCFIVMEFVRGESLADLLER-EGRLPEDLALDVM EQAAHG  
23491869 HVVTTYDYREVADP-AG-HTFCFIVLEYIRGESLADMLER-EGALPEELALDVM EQAAHG  
38232690 NVVRTYDYREVTDD-MG-RTLFCFIVMEYVRGESLADMLAR-KGRLEEDLALDVL EQAAHG  
68535100 NVVRTYDSGEVEDPDNG-TVFCYIIMEYIRGESLADVLSR-ESSLPQNLALDVL TQTAAG  
116668589 GIANVFDYGE----EEG----SAYLVMELVPGQPLSSIIIEH-EQVLSPDRTLSMIAQTARA  
119963247 GIANVFDYGE----EAG----SAYLVMELVPGHPLSGILER-EQVLSPDMTLSIISQTARA  
28493744 GIANIFDYGE----EKG----IAYLVMELVDGEPLSAVLER-ERMLPVEEVLRIVVQISRA  
119025057 NIAALFEYYEH---DGIG----FLIMEYVPSKSLADLYHEQNGPMDPIKLLPILIQTARG  
23325796 NIAALFEYYEH---DGIG----FLIMEYVPSKSLADLFHS-KGAMPDPIELLPILIQTARG  
119714295 NIAAVYDFGEAPAADGSGVQRPFLVMELVDGQPLSALLRP-GAPMPDPAVRELLAQAADG  
145592613 GVVDIYDFGSDQ-----QIAFLVMEYVEGDALSATLNR-VGRLTSARTMALVAQAADA

145594644 GVVQVFD CGADELPTGD--QANYLIMEFVTGEPLSRRIEA-AGRLDVAETMSIVEQAAQA  
21222257 AIVAVYDTGE---DYIDNVSIPYIVMEYVDGSTLRELLHS-GRKLLPERTLEMTIGILQA  
29830881 AIVAVYDTGE---DYIEGISIPYIVMEYVDGSTLRELLHS-GRKLLPERTLEMTIGILQA  
50841673 NIAAVYDTGET-KDPATGLPVPFIVMELIDGHTLRDVLDRD-GRKILPRRALEFTQGV LDA  
145592614 AIVAVYDTGE--EQAPTGETLPFIVMEFVGGRTLKEVLGG-EGRFQPRRALEICADMC AA  
22777192 NIVNIFDVGE-----EDQLLYMVMEYVDGMTLKEYIHQ-HGPIDVPEALDIMKQLTSA  
119900063 NIANVFSFFA-----EDGQYYVMMEFVDGEPLNRLARR-RGALPWREAVALLVQALY G  
2911096 ALVAVYDQ GKDG-----RHPFLVMELIEGGTLRELLIE-RGPMPPHAVVAVLRPVLGG  
13881919 ALVAVYDQ GKDG-----RHPFLVMELIEGGTLRELLIE-RGPMPPHAVVAVLRPVLGG  
31793354 ALVAVYDQ GKDG-----RHPFLVMELIEGGTLRELLIE-RGPMPPHAVVAVLRPVLGG  
116670115 HVVGVLDQGS DG-----HTAYLVM EYIKGHTLRDVIKE-KGALSRLALALIDPVVEG  
: . . : : : \* : . . \* : . .

1552570 LQIAHAAGLVHRDVKPGNILITPTGQVKITDFGIAKAVDA--APVTQTGMVMGTAQYIAP  
13879059 LQIAHAAGLVHRDVKPGNILITPTGQVKITDFGIAKAVDA--APVTQTGMVMGTAQYIAP  
31791192 LQIAHAAGLVHRDVKPGNILITPTGQVKITDFGIAKAVDA--APVTQTGMVMGTAQYIAP  
13092427 LQIAHAAGLVHRDVKPGNILITPTGQVKITDFGIAKAVDA--APVTQTGMVMGTAQYIAP  
120401052 LQVAHSAGLVHRDVKPGNILITPTGQVKITDFGIAKAVDA--APVTQTGMVMGTAQYIAP  
145221405 LQVAHSAGLVHRDVKPGNILITPTGQVKITDFGIAKAVDA--APVTQTGMVMGTAQYIAP  
126432629 LQVAHTAGLVHRDVKPGNILITPTGQVKITDFGIAKAVDA--APVTQTGMVMGTAQYIAP  
111020684 LQVAHDAGVHRDVKPGNILITPTGQVKITDFGIAKAVEN--SPITRTGMVMGTAQYIAP  
54022045 LEVAHAAGVHRDVKPGNILVTPGQVKITDFGIAKAVDA--SPVTKTGMVMGTAQYIAP  
134096663 LQAAHERGLVHRDVKPGNILITPNGVKVLTDFGIAKAAADA--APVTRSGMVMGTAHYIAP  
19551292 LSVIHRMDMVHRDIKPGNMLITANGIVKITDFGIAKAAAA--VPLTRTGMVVGTAQYVSP  
23491869 LSVIHRMGLVHRDIKPGNMLITANGILKITDFGIAKAAAS--VPLTRTGMVVGTAQYVSP  
38232690 LSI IHRMGMVHRDIKPGNLLITQNGQVKITDFGIAKAAAA--VPLTRTGMVVGTAQYVSP  
68535100 LKAIHEAGLVHRDIKPGNLLITSDGFVKITDFGIAKAAAA--VPLTRTGMVVGTAQYVSP  
116668589 LSV AHSQGLVHRDIKPGNLLITPDGRVKVTD FGIARLADQ--VPLTQTGQVMGTAQYLAP  
119963247 LAVAHAQGLVHRDIKPGNLLITPDNRVKVTD FGIARLADQ--VPLTQTGQVMGTAQYLAP  
28493744 LQAAHSAGLVHRDIKPGNILISEGLVKITDFGIARIGDQ--VPLTTTGQVMGTVHYLSP  
119025057 L FVAHSHGVIHRDVK PANIMVSDS GEVKITDFGVSYSTNQ--EQITQDGMVVGTAQYISP  
23325796 L FVAHSHGVIHRDVK PANIMVSDTGEVKITDFGVSYSTGQ--GQITQDGMVVGTAQYISP  
119714295 LAAHAAGIVHRDVK PANLLVTPDRQVKITDFGIARAAEG--IGLTGTGEVMGTPQYLSP  
145592613 LHA AHLEGIVHRDVKPGNLLVRPNGLTLVLTDFGIARSDLV--AQLTAAGSVLGTASYISP  
145594644 LETVHRRGVVHRDIKPSNLVVQENG SVVLVDFGVARSTNV--TSITNTNAVPGTALYMAP  
21222257 LEYSHRAGIVHRDIK PANVMLTRNGQVKVMDFGIARAMGDSGMTMTQTA AVIGTAQYLS P  
29830881 LEYSHRAGIVHRDIK PANVMLTRNGQVKVMDFGIARAMGDSGMTMTQTA AVIGTAQYLS P  
50841673 LSYSHAAGIVHRDIK PANVMLTREGYVKVMDFGIARAVADTSATMTQTA AVIGTAQYLS P  
145592614 LEFSHRHQI IHRDIKPGNMLTQTGQVKVMDFGIARALASGATTMTQTS AVIGTAQYLS P  
22777192 IAHAHANEIVHRDIK PQNILINSTGQAKVTDFGIAMALS--ATALTQTN SILGSVHYLSP  
119900063 LEHAHHAGVHRDIKPSNMIVTADGTLKLMDFGIARILEK--VGLTRTGCVVGTL LYVSP  
2911096 LAAHRAGLVHRDVK PENILISDDGDVKLAD FGLVRVAAA--ASITSTGVILGTAAYLSP  
13881919 LAAHRAGLVHRDVK PENILISDDGDVKLAD FGLVRVAAA--ASITSTGVILGTAAYLSP  
31793354 LAAHRAGLVHRDVK PENILISDDGDVKLAD FGLVRVAAA--ASITSTGVILGTAAYLSP  
116670115 LGAHAAGLIHRDIK PENVLIADDGRIKVGDFGLARAVTT--S--TSTGALIGTVAYLSP  
: \* : : \* \* \* \* : \* \* \* : \* : \* : \* \* \*

1552570 EQALGH DASPASDVYSLGVVGYEAVSGKRPFAGDGALTVAMKHIKEPPPP--LPPDLPP  
13879059 EQALGH DASPASDVYSLGVVGYEAVSGKRPFAGDGALTVAMKHIKEPPPP--LPPDLPP  
31791192 EQALGH DASPASDVYSLGVVGYEAVSGKRPFAGDGALTVAMKHIKEPPPP--LPPDLPP  
13092427 EQALGH DATPASDVYSLGVIGYEVVSGKRPFAGDGALTVAMKHIKEPPPP--LPADLPP  
120401052 EQALGH DATAASDVYSLGVVGYEAVSGKRPF IG DGALTVAMKHIKETPPP--LPADLPP  
145221405 EQALGH DATAASDVYSLGVVGYEAVSGKRPF TGDGALTVAMKHIKETPPP--LPADLPP  
126432629 EQALGH DATAASDVYALGVVGYESVSGKRPF TGDGALTVAMKHIKETPPP--LPADLPP  
111020684 EQALGQ DATAASDVYSLGIVGYEALS GRRPFVGDG AITVAMKHVQEAPAP--LPSDLPP  
54022045 EQAVGEDATAASDVYSLGVVGYEALAGKRPFSGDG AITVAMKHVRETPPP--MPADVPA  
134096663 EQALGSEATPASDVYSLAVVGYECLKGHRPFLSDNAVTVAMMHIREVAPP--LPPDVPP  
19551292 EQAQGKEVTAASDIYSLGVVGYEMMAGRRPFTGDSSVSVAIAHINQAPPQ--MPTSISA  
23491869 EQAQGHQVTPASDVYSLGVVGYEMLSGRRPFTGDSSVSVAIAHINEAPPQ--MPTSVSA  
38232690 EQAQGRDVTAATDVYSLGVVGYEMLVGQRPF TGDSSVSVAIAHINQAPPA--MPTSVSA  
68535100 EQAQGDQVGPASDVYSLGVVGFEMLAGYRPFSGESTVSVAIKHISETPPE--LPEEIDP  
116668589 EQATGQTATGASDIYSLGVIGYECLTGHRPFSGESQIAIALAQVNDAPP--LPETLPT  
119963247 EQATGQTATGSSDIYSLGVIGYECLTGHRPFSGESQIAIALAQVNDAPP--LPETLPT  
28493744 EQAAGKKADAMTDVYSLGVVAYECLTGKRPFVGD SQVAIAVAHVGDTPAN--LPKDI PR

119025057 EQAQQKHATPQSDIYSLGVVAYEGLCGHRPFTGATPVDIAAAHVNNPVPP---LPDPTVDV  
23325796 EQAQQQATPQSDIYSLGVVAYEGLAGHRPFTGTTTPVDIAAAHVNNPVPP---LPDSVDV  
119714295 EQAQQQTATPASDVYSLGVVAFECLAGRRPFVADTAVATALAHLREPVP---LPESVPA  
145592613 EQATGAVATPSSDVYALGVVAYQCLSGRRPFEGDNPLDIALRHRVDTpra---LPADIPS  
145594644 EQAAGRPVSGATDIYALGAVAYCCLSGSPFPFTGDSPLQVAVAHLDDEDPPE---LPHDIPE  
21222257 EQAKGEQVDARSPLYSTGCLLYELLTVRPPFVGDSPVAVAYQHVREEPQAPSVFDPEITP  
29830881 EQAKGEQVDARSPLYSTGCLLYELLTVRPPFVGDSPVAVAYQHVREEPQPPSVFDPEITP  
50841673 EQARGETVDNRADIYATGCLLYELLVGRPPFIGDSPVSVAYQHVREIPAPSSLDAEITH  
145592614 EQARGESVDARSVDVYAAGCVLFELLCGHPPFVGDSPVSVAYQHVREAPPTPSDLNPEVPP  
22777192 EQARGGMATKSDIYSMGIVLYELLTGKLPFSGQSPVSIALKHLQNNTPSVKKNPFIPO  
119900063 EQARGGDIDARSPLYSMVAVLYELLTGRAPFDSPSEFELMRAHIELPPPPSGLVSGLPP  
2911096 EQVRDGNADPRSDVYSVGVLVYELLTGHTPFTGDSALSIAAYQRLDADVPRASAVIDGVPP  
13881919 EQVRDGNADPRSDVYSVGVLVYELLTGHTPFTGDSALSIAAYQRLDADVPRASAVIDGVPP  
31793354 EQVRDGNADPRSDVYSVGVLVYELLTGHTPFTGDSALSIAAYQRLDADVPRASAVIDGVPP  
116670115 ELVLGRQADARSDIYSVGIMLYEMITGSQPFQDGVPIQVAYQHVNSVEAPS AVVPGLAA

\* . . : \* : : : \* . . : :

1552570 NVRELIEITLVKNPAMRYRSGGPFADAVAAV-----  
13879059 NVRELIEITLVKNPAMRYRSGGPFADAVAAV-----  
31791192 NVRELIEITLVKNPAMRYRSGGPFADAVAAV-----  
13092427 NVRELIEITLVKNPGMRYPSGGLFAEAVAAV-----  
120401052 NVRELIEITLVKNPGMRYKSGGPFADAVAAV-----  
145221405 NVRELIEITLVKNPGMRYKSGGPFADAVAAV-----  
126432629 NVRELIEITLVKNPGMRYRSGGPFADAVAAV-----  
111020684 NIRELIDITIAKDPSTRYASGGEFADAVAAV-----  
54022045 NVRELIEITMGKDPQLRYASGGEFADAVAAV-----  
134096663 GARALIEATLVKDPRRRYATGGEFANAVAAV-----  
19551292 QTRELIGIALRKDPGRRFPDGNEMALAVSAV-----  
23491869 QARELIGIALRKDPARRFADGNELARAVSAV-----  
38232690 PARELIGIALRKDPAHRYADGNELALAVSATRMG---  
68535100 NLRELIRVCLRKS PRTRYADGAELATATVMV-----  
116668589 PVRALLMSMLAKDPKPNR PANAIKLSEAAEAI-----  
119963247 PVRALLMSMLAKDPKPNR PANAIKLAEAAEAI-----  
28493744 PVARLVLCLEKQPQRPKSAGNLADAASALLKDDLA  
119025057 QLREFVMSMLAKDPLDRPKDALVVSR TL-----  
23325796 QLREFVMSMLAKDPLDRPKDALVVSR TL-----  
119714295 DLA AVVRRALAKLPQDRFADGAALAAALRD-----  
145592613 QVR AVVERAMAKDPADRWPSAAALAGV-----  
145594644 AVRALVRRALAKNPESRFGSGSAMAAAARA AV-----  
21222257 EMDAIVL KALVKDPDYRYQSADEM RVDI-----  
29830881 EMDAIVL KALTKDPDYRYQSADEM RIDI-----  
50841673 QMDAITL KALAKDPADRYQTAKQMRDDI-----  
145592614 AVDAI I LKALS KNPLNRYQSAGEMRADL-----  
22777192 SVENIVLQATAKDPFHRYNNIYELEEALET-----  
119900063 GLEAVILRALAKDPADRFQHAEAFRSELEHL-----  
2911096 QFDELVACATARNPADRYADAIAMG-----  
13881919 QFDELVACATARNPADRYADAIAMG-----  
31793354 QFDELVACATARNPADRYADAIAMG-----  
116670115 EVDELVQWCTARDPEQRPVDGNALLSELRHI-----

. : \* \* .



Cluster No. 12 multiple sequence alignment

CLUSTAL 2.0.10 multiple sequence alignment

```
126432846 YLLVELVGRGGMGGEVWRAHDTATNRTVALKVLPAHLVHDTEYRVRFQREARAAAARLSDPH
41407147 YRILELLGRGGMGRVYRAYDATTDRVVALKVLPPHLAEDQDFQQRFRREARIAAGLNDPH
54022953 YRLERPLGSGGMQVWAAHDTRRGRRVALKLLPADLAADDGYRARFEREAELAATLRHPH
111021257 YVIERVLGRGGMGTVYLAQHPNLPRKIALKLLDTSWTNDDYVRSRFESEADHAAHLDHPN
108760681 WLVEQVHYRGPVSTLYRARHVRTGALAALKVLLPQPS-DVALR-RFRREAETLQRLRHPH
86158242 FEIEGVIGRGGFGEILSARRTRDGTAAAVKISQ---GSTPRARDQLLREAAALREIGPEL
: : * .. : * *::: : :: ** :
```

```
126432846 IVPIHGFGGEI-DGRLYVDMRLIEGRDLEHLLRE--GPLDPARAVMIIDQVAAALEAAHEV
41407147 VVPIHGYPEI-DGRLYVDMRLIEGRDLAHYITENGGRLSPQRAVAVIEQVAAALDSAHRA
54022953 IVPIHGHGAV-DGRLYIEMELVEGTDLGARLAAG-GPLDPPTALDILDQVAAALDAAHAA
111021257 IVTVHDRGRE-GGRLWIAMQYVPGSDARKALGS--GALDVERAVHIVSETGKALDYAHEA
108760681 IVDVLGYGTLADGRPFIAMEWLEGRDLAAELASR-GPLSPGEALEVLEQVGGALRTAHQA
86158242 APAVLASGMLDDGRAWVALERLTAPSLAERVRAEDAPLDLEALRDAVLALADALATLHGR
: * .** :: : . . : . * . : . ** *
```

```
126432846 GLVHRDVKPSNILVG----KFDFTYLIDFGIARPIDDT-----GLTSVNRAVGTFFHYMAP
41407147 GLIHRDVKPMNVLVTT---ARDFVYLIDFGLARAQADT-----ALTQTGATMGTVAAYMAP
54022953 GLVHRDVKPSNILLR----PDGFAYLIDFGIARGVGQT-----SLTATGLTIGTWAYMAP
111021257 GILHRDVKPANILLAPG--DPERVLLTDFGTAKALDETH----QLTRTGMLVATLHYAAP
108760681 GVVHRDLKAQNVVRLSTGSGAPRVKLVDFGVAKGLTPDAPGASTLTLTGVS LGTPLSMAP
86158242 GWRHLDLKP RHFVFE-----PGGARLVDFGLAHGPASVAT---EDAPAGASAGTAAAYMAP
* * *:* . :: . * *** * : .. .* **
```

```
126432846 ERFRDGRGDPRSPTYALACVLYQCLTGSRPFHGDLSLEQQIAGHLMTPPPRPSTVQPGVPA
41407147 ERFT-GTTDHRADVSLACVLHECLTGKRPFAGDSLEEQLNAHLNTAPPRPSATAPEVPA
54022953 ERFS-GHADARSDVYSLACVLFESLTGRRPYGDTDPAQOMHGHLMSDPPRAAAVDPTIGP
111021257 EQIEGEKLDHRVDIYALGCTFFHLLTNEPPYPGNTASSVMHGHLN GPIQPSVVRPGLPT
108760681 EQIRGEPPDARTDLYAMGVLLFQLVLTGQPPFQGATRHEVEDLHLNAPPRP SERAP-VPA
86158242 EQVRGDAADARADVYAAGAILFELVTGAPPFEG-SPGEQRQAHLARRPGRPS-EHAGVPP
*:. * * * * : . :.. :*. * : . . ** :. : . :
```

```
126432846 KFDAVIARGMAKNAERYRSAI-----
41407147 AFDAVIARGMAKDPERRYQSVTELAEEAARAAL---
54022953 RLDAVIAHGMAKDPAHRHASAGEFLRA-----
111021257 GVDVAVARALAKNREDRYSTCREFS DAV-----
108760681 ALDAVVLRS MGKRREDRYPDIDAWLDAL-----
86158242 ALEEVILRCLAKLPEARYADGSALRVALREAFASV
.: * : : :.* * :
```

Cluster No. 13 multiple sequence alignment

CLUSTAL 2.0.10 multiple sequence alignment

```
86157501      FRIVRMLARGGMGTVYLAEHPVIGSRVAIKFLHESMAADAELVQRFYDEARAVNLIGHEN
86160067      YRVLSQLGEGGMGAVYLCHEHSVLRGRRFAVKVLRRAERATDAELRERFRNEALAASRIGQEN
86156544      YRLVSLGEGGMGAVYRAEHVQMGKALAVKVLRGDFARDPSAAERFRAEARIVSRLSHPH
108764043     FRVLRPLGSGGMGEVYLGEQVSLGRKVAIKVLHHDHLHAQAGMAERFKREARLLSAVEHPA
116624752     YRILEKLGQGGMGEVYRAEDERLKRVAIKVLRHHENRD--AALRFLQEARAASALNHPN
86743111      YELGEGIGYGGMAEVFRGRDIRLGRVAVKTLRPDLARDPTFLARFRREAQSSAALNHPA
      ::   :.  ***. *:  ..  :   .*: * * :   :   **  **   :  :

86157501      IVGVYDLS---SLPSGRYYVMELLEGETLAERLAR-GPLPRSVALQVLLQLCDALQCAH
86160067      VVDVLDVG---EADGTLYYVMEALEGRSLGAVLREEGALPVGRALGLLDHVCRALAAAH
86156544      TIAVDFDG---ELPERGFYLAMEYVPGQDLARALREGGAFSEARAVGVAQQVGLSLAEAH
108764043     VVRIVDFG---ESGD-HACLVMFVEGESLYDVLTP-GMPPGRALPLLQQLAEGLAAIH
116624752     IVQIYD----LESHDGRDFIVMELASGRTL-AALVRDHPLRVEEALDYASQLASALAAAH
86743111      IVSVYDTGEDLINGAQIPYIVMEFIEGRTLRLDALQTEGRFTERRAMEITSDVCAALDYSH
      :  : *           .**  * . *  *   :   * :   . :  . *  *

86157501      ERGVVHRDLKPENVFLVPRRGRPDFVKLVDVDFGI AKLR-----SATGHATGASGAIIG
86160067      ARGVVHRDVKPENVFVVRGPDGVERAKVLDVDFGISHVEQ-----PGRADRITRAGAIIVG
86156544      EAGVVHRDMKPANVMLMQARPGEDFAKVLDVDFGI AKLR-----DEAGGATTGAGAVVG
108764043     DKGIIHRDLKPENVFISKSARG-EQARLLDFGIARLVE-----PDAASSVSQIGVVLG
116624752     AGGIVHRDIKPANIVVSE----SGTIKVLDVDFGI AKLEPHGPGSDSTETAAPETAAGSFLG
86743111      RMGIIHRDIKPANVMLSP----DGSVKVMDVDFGIAR-----ATTATSSTMTATAAVIG
      *::***:** *:::           :::*****:           .           . ::*

86157501      TPEYMAPEQCEGGPVDARTDVYALGV MAYELLAGRPFDSGPVQRLLLLLAHLREPPPPPS-
86160067      TPEYMAPEQAVGGPVDHRSDVYALGV LAYEMLTGALPIVGESAIATLVAHQTQAPEPPSR
86156544      TPSCLAPEQARGGPVDARADLYAMGCLLYELVSGRPPFTAASPVAVITAHLDHPPPLRQ
108764043     TPEYLSPEQAVGAKVDTRSDLYSFGVLT YRVLSGRLPFDGPLPRNFLSQHASAAPLPLDR
116624752     TVAYASPEQAQGRPVDARSDIFSAGAVMYEMLTGTRAFDGDSTPGILSKVLRDQPRAICE
86743111      TAQYLSPEQARGARVDARSDVYTTGVLLYELLTGSPFRGDNPVAVAYQHVREDPLPPSA
      *           :***. *  ** *::: * : *:::* . : .           * .

86157501      AFADLE--PDLEAAVLRALAKAPADRFQDMAELADAL
86160067      RRAGIP--PEVDALVLRALAKQPEGRFPSMLDF----
86156544      VAPGVS--PRLAEVVHRALRKDPAERFPSADAMRAAL
108764043     AAPTLSRYVGLLSLVMRLLEKDASKRPQSAHELADAL
116624752     LRAEVP--PAVARIVNRCLEKDIALRYPSTELAADL
86743111      HDRDIS--PEADAIVLKAMEKDADDRYGTAGEMRDDL
      :           * : : *  *           :
```

Cluster No. 14 multiple sequence alignment

CLUSTAL 2.0.10 multiple sequence alignment

```
111024860    FAEVSEIGHGGFGVVFRCREPSLDRTVAVKVLNSTFDE-DGYARFLREQRAMGQLSGHPN
111025675    FEDACIAGRGGFGIVYRCQPALDRVAVKVLSPDPDH-MDRARFLREQQAMGRLSGHPN
3261694      FDNVEEIGRGGFGVVYRCVQPSLDRAVAVKVLSTDLLDR-DNLERFLREQRAMGRLSGHPH
111017776    FDDAQEIGRGGFGVVYRCTQEDLERTVAVKVLTVELDD-ENRARFFREQRAMGRLTGHPN
111020008    -----KVLTVELDE-ENRARFFREQRAMGRLTGHPN
111025634    FDDAQEIGRGGFGVVYRCTQADLERTVAVKVLTVELDD-ENRARFFREQRAMGRLTGHPN
111019707    FEDAHEIGRGGFGIVYRCVQPALDRTVAVKVLAAADLDE-ENRVRFREQRAMGRLTGHPH
111020362    FEDAQEIGRGGFGVVYRCTQAALDRTVAVKVLTAADLDE-QNRERFVREQRAAGRLTGHPN
111026885    FEDAQEIGRGGFGVVYRCTQAALDRTVAIKVLTADLDE-QNRERFLREQRAAGRLTGHPN
111020359    FEDAQEIGRGGFGVVYRCTQAALDRTVAVKVLTAADLDE-ENRARFLREQRAAGRLTGHPN
111023893    FEDAREIGRGGFGVVYRCLQISLARTVAVKVLIAADLDE-LNRTRFLREQRAAGRLTGHPN
111026298    FADAAEIGHGGFGVVYRCRQTALDRTVAVKVLTDGLDE-NSRARFLREQRAAGRLTGHPN
111026453    FDDVHEIGRGGFGVVYRCIQSTLDRTVAVKVLTTDMDN-DNRARFLREQRAMGRLTGHPN
111022297    FDDAREIGRGGFGVVYRCTQPALDRTVAVKVLTDNLAE-ENRERFFREQRAMGRLTGHPN
111026426    FGDASEIGRGGFGVVYRCVQTVLHRTVAVKVLTAADVGD-PNWKRFLEERVGMQLTGHPN
111019396    LEDAREIGHGGFGVVYRCAQPELDRTVAVKVLTAALDA-ENLERFLREQRAMGRLSGHPH
111027133    FDDAQEIGRGGFGVVYRCAQPALERTVAIKVLTTEVDR-DDRDRFVREQRAMGKLSGHPN
111022800    FDDAREIGRGGFGVVYRCLQTALDRTVAIKVLSDDLDE-EDRERFLREQRAMGKLSGHPH
54022251    ----MEIGRGGFGVVYRCLQTALERVAVKVLPPDMA-ESRERFLREQQAMGRLSGHPN
120402091    FVDAVEVGRGGGGVVYRCHQQSLGRTVAIKVLASSLDE-DDRERFLREGYAMGGLSGHPN
126437293    FTDAVEIGRGGGGVVYRCNQKSLGRSVAIKVLASDLDDKDDRERFLREGYAMGGLSGHPN
111017305    FAGAEVGRGGFGVVYRCLQRSLGRIVAIAIKVLTSDLDP-ENRERFLREGYAMGGLSGHPN
```

\*\*\* . \*\*.\* . \* :\*\*\*:

```
111024860    IVNVLIRIGATASGRQFLVMQYHARGSLDAVLRSRGPLEWSAAVRIGVKLAGALETAHRAG
111025675    IVHVLOAGITYTGRPYIVMPFHRRDSLDSWITKHGALRAAEALAVGVKLAGALETAHRAG
3261694      IVTVLQVGLAGRPFIVMPYHAKNSLETLIRRHGPLDWRETLSIGVKLAGALEAAHRVG
111017776    IVNILQVGATDSELPYIVMPYHPQDSLDRIRRHGPLPVEEALRLGVKMAGAVETAHRLG
111020008    IVNILQVGATDSELPYIVMPYHPQDSLDRIRRHGPLPVEEALRLGVKMAGAVETAHRLG
111025634    IVNVLQVGATDSGRPFIVMPYHPQDSLDRIRRHGPLPVEEALRLGVKMAGAVETAHRLG
111019707    IVSALHVGATDSGRPYIVMPYHSQDSLDRIRRHGPLPLEEALRLGVKMAGALETAHRLG
111020362    VVNVLHVGVTDNGRPYIVMPYHAQDSLDRIRRHGPLPLEEALRLGVKMAGALETAHRLG
111026885    VVNVLHVGVTDNGRPYIVMPYHAQNSLDARIRRHGPLSLDEALRLGVKMAGALETAHRLG
111020359    IVNVFHAGVTDNGRPFIVMPYHAQGSLEDRIRRHGPLPLEEALRLGVKIAGALETAHRLG
111023893    VVNVLQVGVTNGRPFIVTPYLAQGSLEDRIRRHGPLPLEEALRLGVKIAGALETAHRLG
111026298    VVNVLQVGVTENDRPYIVMPFYAHDSLDAWIRRHGPLTLEDMLRVGVKIAGALEAAHGLG
111026453    IMSVLEVGATDSGRPYLVMPFHSQDSLDIRIRRHGPLTVEEALRLGVKTAGGLETAHRAG
111022297    IVNVLQVGVTDSGQPFIVMPYHPQGSLEDRIRRHGPLGVDEVLELGVKLAGALEAAHGLG
111026426    IVSALQVGVTGGRPFIVMPYHEQGSLEDRIRRHGPLPLEEALRLGVRLAGALETAHRLG
111019396    IVNIMQVGTDTGRPYIVMQYHPHDSLDAQIRRRGPIPWSDALRVGVKLAGALETAHRVG
111027133    IVPVLQVGITDAGRPFIVMPYHSRDSFDAEVRRHGPLPWPDLVAIGVKLAGALETAHRLG
111022800    VVDILQSGVTRSGRPYIVMPYHSRNSLDAWIRREGPLPWSETLRVGVKLAGALETAHRLG
54022251    IVDILQVDVTASGLPFIVMPYCTHGSLEQLIHEQGPLGWADTLRVGVKLAGAIESAHRAQ
120402091    IVNILQVGMTEQDRPFIVMPYHARGSLADQVRREGRIWPDPALRIGVKLCCGALETAHRTG
126437293    IVNILQVGVTNGRPFIVMPYHARGSLAQRVRREGRIAWPEALRIGVKLCCGALETAHRTG
111017305    IVNILQVGVTDAGRPFIVMHYHPRDSLAVQIRREGPLPWPEAISIGVKLAGALETAHRTG
```

:: :. . ::\* : :.\*: : \* : : .\*\* : .\* : :\*\*

```
111024860    ILHRDIKPGNVLLTSYGEPQLSDFGIARIAGGFETDTGTITGSPAFTAPEVLSGDPPTLA
111025675    VLHRDIKPGNILLTEYGEPQLTDFGIARITGGEETTRGLVAGSPAYTAPELLSGSDASVV
3261694      TLHRDVKPGNILLTDYGEPELTDGFIARIAGGFETATGVIAGSPAFTAPEVLEGGASPTPA
111017776    ILHRDIKPGNILLTDYGEPELTDGFIARIAGGFETATGVIAGSPAFTAPEVLEGGASPTPA
111020008    ILHRDVKPGNILLTDYGEPELADGFIARIAGGFETATGVIAGSPAFTAPEVLEGGASPTPA
111025634    ILHRDVKPGNILLTEYGEPPELTDGFIARIAGGFETATGVIAGSPAFTAPEVLEGGASPTPA
111019707    VLHRDLKPGNILLTDYGEPELTDGFIARIAGGFETATGVIAGSPAFTAPEVLEGGASPTPA
```

111020362 ILHRDVKPGNILLTDYGEPAISDFGIARIAGGFETTAVVVTGSPAFTAPEVVVTGEPSSAA  
111026885 ILHRDVKPGNIMLTDYGEPAITDFGIAHIAGGFETTAVVVTGSPAFTAPEVVVTGEPSSAA  
111020359 ILHRDVKPGNIFLTDYGEPAITDFGIAHIAGGFETTAVVVTGSPAFTAPEVVVAGEPPSAA  
111023893 ILHRDVKPGNILLTDYGEPAITDFGIAHIAGGFETTAVVVTGSPAFTAPEILAGESASAA  
111026298 ILHRDVKPGNILLTDYGEPAITDFGIAHISGGFETTAVVVTGSPAFTAPEVIAGGAPSPA  
111026453 IVHRDVKPGNILLSDFGEPVLADFGIAHVVDFAKTTTGTVTGSPAFTAPEVLSGDSPTPA  
111022297 IVHRDVKPGNILLTDYGEPAITDFGIAHISGGFETATGIVTGSPAFTAPEVLGGAAPSPA  
111026426 IVHRDVKPGNILLTDYGEPAITDFGIAHISGGFETATGIVTGSPAFTAPEVLSGQAPSPA  
111019396 ILHRDVKPGNILLTDYGEPAITDFGIAHISGGFETATGIVTGSPAFTAPEVLSGRTPTAA  
111027133 ILHRDVKPGNILLTDYGEPAITDFGIAHISGGFETATGIVTGSPAFTAPEVLSGRTPTAA  
111022800 TLHRDVKPGNILLTDYGEPAITDFGIAHISGGFETATGIVTGSPAFTAPEVLSGRTPTAA  
54022251 ILHRDVKPGNILLSYGEPAITDFGIAHISGGFETATGIVTGSPAFTAPEVLSGRTPTAA  
120402091 TLHRDIKPGNILLTDYGEPAITDFGIAHISGGFETATGIVTGSPAFTAPEVLSGRTPTAA  
126437293 TLHRDIKPGNILLTDYGEPAITDFGIAHISGGFETATGIVTGSPAFTAPEVLSGRTPTAA  
111017305 TLHRDIKPGNILLTDYGEPAITDFGIAHISGGFETATGIVTGSPAFTAPEVLSGRTPTAA

:\*\*\*:\*\*.\*:: . :\*\*\* \*:\* \*\* \*:: .. .: . .:\*: :: \*\*\*: \* .:

111024860 SDVYGLGATLFCLLTGHAFFERRSGEQVVAQFLRIAASAPRLPAAGIPAD-----VRA  
111025675 TDVYGLGATLFTALAGRPAFARRRGEQVFAQLLRIGTEPLDRLDVGPEA-----VCT  
3261694 SDVYSLGATLFCALTGHAAYERRSGERVIAQFLRITTSQIPDLRQGLPAD-----VAA  
111017776 ADVYGLGATLFTLTGHAFFERRSGEQVVAQFLRITTTQVPDLREHGIPDD-----VSA  
111020008 ADVYGLGATLFSALTGHAFFERRSGEQVVAQFLRITTTQVEPDLRERGLPDD-----VSA  
111025634 ADIYGLGATLFSALTGHAFFERRSGEQVVAQFLRITTTQVEPDLREQIPED-----VSG  
111019707 SDIYGLGATVFCAVTGHAFFERRSGEHVVAQFLRITTTQVPDLREHGVPDD-----VSE  
111020362 ADVYGLGATLFAAMTGHAFFERRSGEQVVAQFLRIAEPGPDPKXHGIPED-----VST  
111026885 ADVYGLGATLFAAMTGHAFFERRSGEQVVAQFLRITAEPVDPKXHGIPED-----VSM  
111020359 ADVYGLGATLFAAITGHAFFERRSGEQVVAQFLRITSEPVPNPREHGISEG-----VSA  
111023893 ADVYALGATLFAAITGHAFFERRSGEQLVAQFLRISSAPVDPREHGVLED-----VSA  
111026298 ADVYGLGATVFAAATGHAFFERRSGEQLVAQFVRITTTAPTDPREHGIADD-----VST  
111026453 SDVYGLGATLFTALTGHAFFERRSGEQVVAQFLRITTTQVPDLRIHGFAD-----VSA  
111022297 SDIYGLGATLFCAVTGHAFFERRSGEQVVAQFIRITTESAPDLRQGLADD-----VAT  
111026426 ADIYGLGATLFCALTGHAFFERRSGEQVVAQFLRITTTQVPDLRTEGFPED-----LSA  
111019396 SDVYSLGATLFSAITGHAFFERRHNGEEVIAQFLRITTTQVPDLRTEGFPED-----LSA  
111027133 SDVYGLGATLFCLLTGHAFFERRAGEGVIAQFVRITTTPTPDLREPRIGPGRRSKWAARP  
111022800 SDVYSLGALFCLLTGHAFFERRSGERLVAQFLRIATQVPVPLRGEDIPDD-----VCS  
54022251 SDVYGLGATLFAALLTGHAFFERQAGEKVVAQFLRITTTQVPVPLRQDIPAP-----VAE  
120402091 ADVYSLGATLYAMIAGNAHERKADDEELIAHYLRITTSQVPVPLRHLGIPSD-----VCS  
126437293 ADVYSLGATIYALIAGNAPHERKADDEELIAHYLRITSTPVPDLRPEGIPVD-----VCA  
111017305 SDVYGLGATIFSLIAGRAAFERKTEGELVAQFVRISSQVPVPLRAQGIIPDG-----VCA

:\*:\*.\*\*\*\*::: :\*... . \* . \* \* :\*: :\*: : \*

111024860 AVESAMARDPGRRPATAAEFGHQL-----  
111025675 VIESAMARDPAERPATAADLGGALRRAGEHI  
3261694 AIERAMARHPADRPATAADVGEEL-----  
111017776 AIAHAMSREPDQRPATAADFGEEL-----  
111020008 VIAHAMSREPGQRPATAADFGEEL-----  
111025634 TIARAMSREPGQRPASAADFGEEL-----  
111019707 IVDRAMAADPRQRPATAADFGEEL-----  
111020362 IIERAMSGTSEGR-PSATELGQQL-----  
111026885 IIEHAMSGETPASR-QSATELGQQL-----  
111020359 VIERAMSAEAGAR-PSAVELGRQL-----  
111023893 IIEHAMSGDPGRR-PSAAELGELL-----  
111026298 VIEAAMANDPAGR-PSVEKLGQQL-----  
111026453 AIEYAMSRATAADR-PSAAAFGERLQOIQAHL  
111022297 VIEQAMAGRPEDRQPSAAVLGERL-----  
111026426 AIERAMARAPQDRQASAAVLGEEL-----  
111019396 VIQRAMSGKPEDRPASAAAFGDEL-----  
111027133 ELPSPTRSPGTQITPPTDTNAPHL-----  
111022800 AIERAMSEPTDRPASAAEFQEL-----  
54022251 AIERAMSPDPQORPESAFEFGEML-----  
120402091 AIEKAMSLESAARFDSAAEFGRAL-----  
126437293 AIEKAMSREPADRYASAEFGLELQL-----  
111017305 VIERAMATNPAARPGSAEEFGHEL-----

: . . . . \*

Cluster No. 15 multiple sequence alignment

CLUSTAL 2.0.10 multiple sequence alignment

```

17131350      YQIRQMLG-GGGFGKTYIALDTRPGQPKCVVKHFQPVTHNPEFMETARRLFTSEAETLE
17133950      YQVIRVLA-IGGFGQTYIAQDTRRPGNPTCVVKHLKPATSDPRVFETAKRRLFNSEAETLE
17130959      YSISVVLG-AGGFGRTYLAQDTRPGNPTCVVKKLMARKDTKFLQVARRLFITEAEILE
22298748      YKIQKVLG-SGGFGRTYLAQDTRPGNPLCVVKHLRPGRTDERFMQVARRLFNTEAEILE
113475717     YKIIKPIG-KGGFGVTFLAKDISLPGAPICVIKELRPSSTKASELEMARKLRFQREAEITLG
17129783      FRVVRVLSDEGGFGRTYLSKDKD-LNEPCVIKQLAPKFQGTWSQKKAVELFAEEAKRLQ
17132214      YRIIKVLSDEGGFGRTYLSKIDK-LNELCVVKQFAPKVQEHSAKKAVELFKQEAQRLQ
17133805      YRIVQILG-QGGFGRTYLAEDQRR-FNELCAIKELIPTATGTVAWEKAQELFHREAAILY
: :   :.   **** *::: *           *.:*.: *           : * .**  **  *
    
```

```

17131350      RLGHHDQIPRLLAYFEEHQEFVLVQEFIDGHSLSKAEMPP----NQPWTEKKVVIILLOQAL
17133950      NLGHHDQIPRLLAYFDENQEFYLVQEFIDGHTLLEELIP----GNRWSEGQVTHLLQEIFL
17130959      SLGQHQQIPALLAYFEVNEEFYLVQEQYIAGHTLHEELPPV---AGLQSEAFVVEMLKGVL
22298748      KLGRHDQIPLLLAYVEENREFYLVQEFIDGVSLSEELK-----RKHTEAEAIQLLREIL
113475717     KIGHHPQVPRLLDYFEWKKRFHLVQEVVSGLTLKQEVKK----QGIFTEEQGGKFLIEVL
17129783      ELGHEHPQIPTLMAYFEQDNCLYLVQQFINGQNLKELQOR----KNYRPGEIQAILLDLL
17132214      HLGEHHQIPTLLAYFEQDNYLFLVQQFINGNLLQELRQG----VVYNSTIVEFLLDLL
17133805      QI-ENPQVPKFKREKFEQDQRLFLVQDYVAGKTYWDILKERQAIGQAFTLEVLQLIRSL
: .:  ** :   .:  .:  .:***::: * .           :           : :  *
    
```

```

17131350      DILQFIHLHKVIHRDIKPENILRRLHDGKLVLDIDFGAVKEVQTQI---SAISGQTEMTVA
17133950      CILEFVHHQGVHRDIKPDNIIRRTADNKLVLVDFGAVKQLRTQL---VTVGGQSSATVA
17130959      EVLAFVHEHRVIHRDVKPTNIIRSAEDNRLVLIDFGAVKMQPPT---DQT--TELATVA
22298748      EVLNFBVHSHYVIHRDIKPDNIIRASDRKLVLDIDFGAVKQIQPQE---AER--TQGSTVV
113475717     SVIDYIHTQGVHRDIKPTNIIRSEGDHGLVLIDFGAVKDHVNQTYISGGTGETAFTNIS
17129783      PVLKFIHVRGVIHRDIKPDNIIRCRTDGRNLIDFGSSKQLTAKVQN-----FGTS
17132214      PVLKYIHERGVIHRDIKPDNIIRROSDGGLVLIDFGAAKQLKATMQTQ-----LGT
17133805      PVLEHLHGRGIIHRDISPDNIILRDSDKPVLIDFGVVKELATRLQSPQEMT----TPVTS
: :  .:* :  :****:. * ** :   *   * :**** *
    
```

```

17131350      IGTGPGYMSLEQFR-GKPRLNSDIYSLGIVCIQALTGVHPRELA-EDPVSGEVLWQNSAE-
17133950      IGTGPGYMPTEQGG-GKPRPNSDIYALGIIAIQALTGILPTQLQ-EDPQTGELIWRHLVN-
17130959      IGTRGYAPPEQFA-GHPRLASDIYAVGMMGIQALTGIPPQELP-PDPETGNVMWRSHAT-
22298748      IGTMGYAPPEQLS-GQPTLSSDIYAVGMIVLQALTGIKPRDLP-RDPRTGEVDWQQCVT-
113475717     IGTSGFSPPEQVL-LRPVYASDIYALGVTTIFLLTGKTPNNLG-YNQVNGEILWHSQVN-
17129783      IGSHGYSPLEQIRDGKAYAASDLFALGATCFHLITSVSPFQLWMEHGYSWVSNWRQYLHS
17132214      IGSYGTPIEQMOMQYKAYPASDLFSLGATCFHLLTGINPSNLFVEQGYSWVESWQQYWNT
17133805      VGKLGYSPEQMOTGRAYPSSDLYALAVTAIVLLTGKEASELFDENQLSWT--WQRWVR-
:* . * : . ** : . ** : : : : : : : : : : : : : : : : : : : : : :
    
```

```

17131350      -VSP-----VLASVLSKMVINNFKLRYQSATEVLEAL
17133950      -VSD-----RLAVVLNKMVRYHFKDRYQTASEALQAL
17130959      -VSE-----ELALILDKMVRYHFSDRYQSATTVLQDL
22298748      -VSE-----GLAVVLNKMVKFNFSDRYPSAKEALQD-
113475717     -VSD-----MFREILKMLEVSVEDRFQSAEELLAAL
17129783      PLTP-----ELDFVLDKLLQKDLKHRYTSADEVIKDI
17132214      SNSDRNEGEYLVKVLNKLLETDIQRRYQSADEVMNDL
17133805      -VNP-----VFAQIINRMLSHAPGDRFQTAEEVSQAL
.           :   : : : : :           * : *
    
```

Cluster No. 16 multiple sequence alignment

CLUSTAL 2.0.10 multiple sequence alignment

27359109 FDELGRIGDEGRNSVVLKVRDVCLDAIMAVKKIKKGSRALPNPAEYFNEARILYANPHPY  
90022722 FHIRHEIGLEGKNSTVFTATDLQLNAEIVVKKMLKS--DFSDVNEYFKEASLLHLSSHNP  
12514297 ---ISDLEEQGCFSKVYLAHDRHLAHDLVIKEIEKK--ENTNHDDYFNARLLYKHAHPN  
15800944 ---ISDLEEQGCFSKVYLAHDRHLAHDLVIKEIEKK--ENTNHDDYFNARLLYKHAHPN

: :\* \* \* . \* \* :.:\*:\* \* .: :\*:\*\* \*: .\*\*

27359109 VVQVNYACEDSSHVYIAMPYKNGSLSKYMSERYLTLGEIVRFSQFLSGLHNIHSNQLI  
90022722 VVPIYYACQDDDHIFLAMPYFELGSLKKRIRESPI SVREII IWSTQVLSGLHNIHSKRLI  
12514297 IVQVQYAAQCESNIYIAMPFYHNGSLNQLMCKNNLTSREIIRYSIQFLSGLYHIHSKGLM  
15800944 IVQVQYAAQCESNIYIAMPFYHNGSLNQLMCKNNLTSREIIRYSIQFLSGLYHIHSKGLM

:\* : \*\*.: :.:\*:\* \* .: .\*\*.: : : : : \*\*.: \* \* .\*\*\*\*.:\*:\* : \*

27359109 HFDIKPDNILLSDRNEAMLSDFGLAKFSDEDFATPNQLYGTHTMPPEAFE--GGEYTNLL  
90022722 HFDVKPDNIFSKRGEALLSDFGLTKQTTFSVAGQDRIYGNMVPPEAFS--TQNFNNQF  
12514297 HFDIKPNNIMISNRNEAMLSDFGLSQLVNEESRAAPEFGYHFVPPPEYFSLSTNDYNFTY  
15800944 HFDIKPNNIMISNRNEAMLSDFGLSQLVNEESRAAPEFGYHFVPPPEYFSLSTNDYNFTY

\*\*\*:\*\*\*:\*\*\*:\*.\*.\*\*\*:\*\*\*\*\*: : .. \* : \* :\*\*\* \*. :.:

27359109 DIYQAGLTMYRMCVGSDEFKQVDTFREPDGTLGHTFIQAVQAGDFPARNAFPAAIHISKV  
90022722 DIYQFGLTLHRMCVGDDIFYAEYATFIEGGDLNRHRFRHAVVNGQFPKNDYPEHIPQAL  
12514297 DIYQAGLTIYRMCVGHDFERERSAFS-----TIEQLRESIINGCYPLK-EYPPHIHKKL  
15800944 DIYQAGLTIYRMCVGHDFERERSAFS-----TIEQLRESIINGCYPLK-EYPPHIHKKL

\*\*\*\* \*\*:\*:\*\*\*\*\* \* \* : :\* . : .: : \* \* : :\* \*\* . :

27359109 KNVITKCMSPDPDDRYMSAIEVVNDL  
90022722 INTIKKCLATDLKERYVSAVDVVNDL  
12514297 ITIVNKCIHVPNERYQSVLDVLDLNDL  
15800944 ITIVNKCIHVPNERYQSVLDVLDLNDL

. :.\*\*\*: \* .:\*\*\* \*.\*\*\*:\*\*\*

Cluster No. 17 multiple sequence alignment

CLUSTAL 2.0.10 multiple sequence alignment

```
1552569      YELGEILGFGGMSEVHLARDLRLHRDVAVKVLRADLARD----PSFYLRFRREAQNAAAL
31791191     YELGEILGFGGMSEVHLARDLRLHRDVAVKVLRADLARD----PSFYLRFRREAQNAAAL
13879058     YELGEILGFGGMSEVHLARDLRLHRDVAVKVLRADLARD----PSFYLRFRREAQNAAAL
13092426     YELGDILGFGGMSEVHLARDLRLHRDVAVKVLRADLARD----PSFYLRFRREAQNAAAL
41406114     YELGEILGFGGMSEVHLARDVRLHRDVAVKVLRADLARD----PSFYLRFRREAQNAAAL
120401051    YEVEGILGFGGMSEVHLARDLRLHRDVAIKVLRADLARD----PSFYLRFRREAQNAAAL
145221406    YEVEGILGFGGMSEVHLARDLRLHRDVAIKVLRADLARD----PSFYLRFRREAQNAAAL
126432628    YELGEILGFGGMSEVHLARDNRLHRDVAIKVLRADLARD----PSFYLRFRREAQNAAAL
54022044     YELGEIIGFGGMSEVHKARDLRLSRDVAIKVLRADLARD----PTFYLRFKREAQNAAAL
134096662    YEIGDTLGYGGMSEVHRGRDIRLGRDVAVKVLRADLARD----PTFQLRFRREAQNAAAL
119900197    YEILGVLGKGGMGTVYKAHPVIDRTVALKTIRRELLDGGG-GESMVERFRNEARAAGRL
108757164    FRLVRLGRGGMGAVYLGEHVSIGSRVAVKVLHAHLTMY----PELVQRFHAEARAVNLI
83644775     YEIVRELGRGAMGVVYLGRDPKISRQVAVKTLNRY-QFDSHRLTDLKARFFREAEAAAGRL
90020763     YEIRSALGKGMGQVYLGFDPRIARQVAIKTLNRY-QFDAALPDIKQRFREAEAAAGRL
71282323     YQVEGVLGKGMGIVYQGVDPKINRHVAIKTLQLSDDIDSPEFGEAKARFFREAQTAGGL
119897189    HTLHGELGRGAI SVIYRGYDPDIGRMLAIKTLRREYAER----EDYRERFLAEARVAGTL
71906564     YRVVRELGKGATATVYLCDDPDSRQVAVKVI RFGQDSAAMS-RRMRKLFQNEGMVSKRL
. :   :* *. . : : .           :*:*:*. . * *.   :
```

```
1552569      NHPAIVAVYDTGEAETPAGPLPYIVMEYVDGVTLRDIVHTEGPMTPKRAIEVIADACQAL
31791191     NHPAIVAVYDTGEAETPAGPLPYIVMEYVDGVTLRDIVHTEGPMTPKRAIEVIADACQAL
13879058     NHPAIVAVYDTGEAETPAGPLPYIVMEYVDGVTLRDIVHTEGPMTPKRAIEVIADACQAL
13092426     NHPSIVAVYDTGEAETSAGPLPYIVMEYVDGATLRDIVHTDGPMPQQOAI EIVADACQAL
41406114     NHPSIVAVYDTGEAETPSGPLPYIVMEYVDGVTLRDIVHTDGPLPPRAIEI IADACQAL
120401051    NHPAIVAVYDTGEAETPTGPLPYIVMEYVDGVTLRDIVHNDGPMAPQRAIEVIADACQAL
145221406    NHPAIVAVYDTGEAETPTGPLPYIVMEYVDGVTLRDIVHSDGPMPPQRAIEVIADACQAL
126432628    NHPAIVAVYDTGEAETPAGPLPYIVMEYVDGVTLRDIVHSEGPMPKRALEVIADACQAL
54022044     NHPAIVAVYDTGEAIDGGPLPYIVMEYVDGETLRDIVRGKGPLPRRAIEI IADVCAAL
134096662    NHPAIVAVYDTGETDSENGPLPYIVMEYVDGRTL RDIVKSEGPLAPRRAMEVMADASAAL
119900197    NHPGIVAIYDFGED----ADVAYIAMEYVDGCGLGQFMKQDARMPVGDVVSIMVQLEAL
108757164    GHENIVSIFDMDATP----PRPYLIMEFLDGAPLSAWVGT--PLAAGAVVSVLSQVCDAL
83644775     DHPNIVTVYDVGEAA----DLAFIAMDYIQGKSLNVYAKPGRLLSVEVVYMLMAKVADAL
90020763     NHPNIVAVYDLGEEP----DLAFIAMDYVDGSPLSAFVNADNLLPVFEVYRVIHDVAVAL
71282323     SHANIVTIYDVGEDN----HLGYIAMDLLTGAPLSLFTQADKILPTPLVYQLLIQITDAL
119897189    SHPGIVTIFDVGVS D----GEPFIAMELLQGPTLAAFVEQRGRLPVRTVIRIAIQIADAL
71906564     NHPNIVRVYEAVVEE----DFAYLAMEYVEGFSLEEHIRIDKLLPMHRVIGIIFKCCMAL
.* ** : : :           : : * : * *           : . . : . **
```

```
1552569      NFSHQNGIIHRDVKPANIMISA----TNAVVMDFGIARAIADSGNSVTQTAAVIGTAQY
31791191     NFSHQNGIIHRDVKPANIMISA----TNAVVMDFGIARAIADSGNSVTQTAAVIGTAQY
13879058     NFSHQNGIIHRDVKPANIMISA----TNAVVMDFGIARAIADSGNSVTQTAAVIGTAQY
13092426     NFSHQNGIIHRDVKPANIMISA----TNAVVMDFGIARAIADS-TSVTQTAAVIGTAQY
41406114     NFSHQNGIIHRDVKPANIMIST----TNAVVMDFGIARAIADSGNSVTQTAAVIGTAQY
120401051    NFSHQNGIIHRDVKPANIMISK----TGAVVMDFGIARALADAGNPVTQTAAVIGTAQY
145221406    NFSHQNGIIHRDVKPANIMISK----TGAVVMDFGIARALADAGNPVTQTAAVIGTAQY
126432628    NFSHQNGIIHRDVKPANIMISK----TGAVVMDFGIARALADS-SSVTQTAAVIGTAQY
54022044     DFSHKHGIVHRDMKPANIMINR----SGAVVMDFGIARALADSSNPMTQTAAVIGTAQY
134096662    DFSHRHHIIHRDVKPANIMITR----SGAVVMDFGIARALTDGQAAVTQTAAVIGTAQY
119900197    EYVHLRGVIVHRDIKAANLLITA----AGKLIKITDFGIARIDTAN---LTQVGAVIGTPTA
108757164    QAAHARGIVHRDLKPDNIFLVRKRKNAPFVKVLDVDFGI AK-LADAHMPQTHAGIIVGTPEY
83644775     EYAHQKNIVHRDIK PANIIFNP---DNQOVKVTDFGIARISDKS---KTRTGQMLGSPLY
90020763     EYAHQHQIVHRDIKPGNIMYRP---VPYHLKVADDFGIARLTDNS---QTTTGEILGSPLY
71282323     EYAHNQN NVHRDIK PANI IYDD---DLLKVTVTDFGIAYVSDNS---NTRTGIIMGSPYY
119897189    DYAHRQAVVHQDIKPDNIAVTS---LNGNVKVMDFGIARLRSGSAASRGTAHV IAGTPDY
71906564     DAAYRQGI IHRDIK PANIMVAA----NDEAKIADFGLALNMNKMMDRSTFIMGVGS PAY
```

: : . :\*:\*:\*. \*: .: \*\*\*:\* \*:.

1552569 LSPEQARGDSVDARSDVYSLGCVLYEVLGTGEPFFTGDSPVSVAYQHVREDPIPPSARHEG  
31791191 LSPEQARGDSVDARSDVYSLGCVLYEVLGTGEPFFTGDSPVSVAYQHVREDPIPPSARHEG  
13879058 LSPEQARGDSVDARSDVYSLGCVLYEVLGTGEPFFTGDSPVSVAYQHVREDPIPPSARHEG  
13092426 LSPEQARGDSVDARSDVYSLGCVLYEILGTGEPFFIGDSPVSVAYQHVREDPIPPSQRHEG  
41406114 LSPEQARGDAVDARSDVYSLGCVLYEILGTGEPFFTGDSPVAVAYQHVREDPVPPSQRHEG  
120401051 LSPEQARGVKVDARSDVYSLGCVLYEVLGTGEPFFVGDSPVAVAYQHVREDPVPPSQRHAG  
145221406 LSPEQARGVKVDARSDVYSLGCVLYEILGTGEPFFVGDSPVAVAYQHVREDPVPPSQRHTG  
126432628 LSPEQARGEKVDARSDVYSLGCVLYEILGTGEPFFVGDSPVAVAYQHVREDPVPPSQRHEG  
54022044 LSPEQARGETVDARSDVYSGCVLFEILGTGEPFFTGDSPVAVAYQHVREDPRLPSHVHHG  
134096662 LSPEQARGESVDARSDVYASGCVLFEILGTGEPFFTGDSPVAVAYQHVREDPRKPSDVNQQ  
119900197 MAPEQFLGLGIDHRADLFASGVVFEILLTGRRPFSG-PIEAMAYQVCNVVQAPPSAQVAG  
108757164 MAPEQSLGRGVDGRADLYALGVIAIYQLLTGRLPFNDEGLAAQLVAHQLRPPPPSSVYPA  
83644775 MSPEQLKGGKVNVDIFSLGVTIFYQLLTGEPFFNADSLPELTQQILNKKHRSVREL RPE  
90020763 MAPEQLKGGKVDYAADLFSLGVTIFYQLLSGELPFKGDNLASLTYEI IHGKHKSQRVQRKD  
71282323 MSPEQILGLKVDGRSDIFSLGVTIFYQLLCGHLPFEGESIATVAYQITKAKAIAVNQRNTN  
119897189 MSPEQIRGKGIDGRSDLYSLGVVLYWLLAGHTPFHGDEVNELLRRILNDAAPPCRPLDPD  
71906564 MSPEQIKGYPLNQKTDLYSLGVLLFQLLTGRLPFRANNQATLIYRIINTDAPAVTALNPN  
::\*\*\* \* :: :\*::: \* : :\* \*. \*\*

1552569 LSADLDAVVLKALAKNPENRYQTAAEMRADL----  
31791191 LSADLDAVVLKALAKNPENRYQTAAEMRADL----  
13879058 LSADLDAVVLKALAKNPENRYQTAAEMRADL----  
13092426 ISVDLDAVVLKALAKNPENRYQTAAEMRADL----  
41406114 ISADLDAVVLKALAKNPDNRYQTAVEMRADL----  
120401051 ISPELDAVVLKALAKNPDNRYQTAAEMRTDL----  
145221406 ISPELDAVVLKALAKNPDNRYQTAAEMRSDL----  
126432628 VSRDLDAVVLKALAKNPDNRYQTAAELRSDL----  
54022044 VPRELDSVVLKAMSKNPANRYQTAAEMRADL----  
134096662 VPASLDAVVLKALSKNPANRYQSAAEMRADL----  
119900197 LAPAFDAIAAKALAKRADDRYADAACFRL-----  
108757164 VSAALEHVILRALAKKPEDRYASIAAFRNAL----  
83644775 LPASAVRITNKALQKDPAKRYANAGEMAEQL----  
90020763 LPTSAARITNQALQKDASDRYSSAADMAAALNKAI  
71282323 LPTSAMRICSKAMHKDIDKRFQSMSEF-----  
119897189 TPDALLDVVRTLLAKDPAERYQSGAELIDDL----  
71906564 LPEGLNAVLRRALEKDLYSRYRNGAEFAKDL----  
. : : \* .\*: :



Cluster No. 18 multiple sequence alignment

CLUSTAL 2.0.10 multiple sequence alignment

```
6457717      YEVLERVIGGGMGSVYRAKRRQDGRVVALKVPQEK-YLADAKFVKR--FYREAQVLRKRFY
94984835     YEVQERIGVGGMGSVYRARRKVDGRMVALKVPQEK-YLADAKFVKR--FYREAQVLRKRFN
111020683    YELGEILGFGGMSEVHLARDVRLSRDVAIKVLRAD-LARDPTFYLR--FRREAQNAALN
29831967     YRLVESIGQGGMGRVWRATDEMLDRQVAVKEMRIDGLDAEDTRTRRERTLREARATARIS
*.: * : * * * . * *      . * * * : . : . * * * . : .
```

```
6457717      HPNIVRVYDYRMOAPEH----YIAMEYLDGDSLEDLLERQ-PFTFSESQMLRAMSDALR
94984835     HPNIVRVYDYRMEEGEH----YIAMEFLDGESLETLLERD-RLSFEESTQVLRALADALR
111020683    HPAIVAVYDTGEAETEAGPLPYIVMEYVDGDTLRDIVRSEGPMAPRRAMEVISDVCAALD
29831967     HPNVVRVYDVDESRL----WIVMELVDGRSLERIVVEDGPLGPGETARIGRELVAALR
** : * * *      .      : * . * * : * * : * . : :      : . : : : * *
```

```
6457717      HIHMQNvvhrDIKpanvmvlrgafengklreggiklmdfgia--vgkvltrltmpgarvg
94984835     HIHLHNvvhrDIKpanvmilkgafvdgrlreggvklmdfgia--vgkvltrltmtgarvg
111020683    FSHRNGIVHRDVkpanvmin-----RAGAVKVMDFGIARAISSDASSPMTQTAAVIG
29831967     QVHAGGVLHRDIKpgnvlven-----LghrvvltDFGIA--AIQDAKALTMVGMLVG
* . : : * * * : * * . * * : :      : : * * * * . . : * . : *
```

```
6457717      TPIYMAPEQAKGNRVDARSDVYSLGLLAYEMVTGVTAFRG-SYEAVVHQVFEQPKPPKQ
94984835     TPIYMAPEQAKGQRVDTRSDVYSLGLLAYEMVTGQTAFKG-SYEAVIHQQVFETPKPPKQ
111020683    TAQYLSPEQARGEQVDARSDVYSLGCVLFEILTGEPPFKGDSPVAVAYQHVREDPQTPSA
29831967     SPDYMAPERVSGRPQPPSDVWVSLGATLCAALGGHSPFSRSTTLATLHAVLYEPELPT
:. * : : * * : . * . . . * * : * * : * * : * * : * * .
```

```
6457717      VNLEVPGLSDLILHMIEKDPALR-PTLDEVIARI
94984835     VRLEVPGRSDLILHMIEKDPDAR-PTLDDVIARL
111020683    VNPDI PRELDSVILKAMSKNPANRYQTAADMRSDL
29831967     A-----GGLRQILAALLEKEPSVR-PGLEEVAAAL
.      * . : :      : . * : * *      *      : : : :
```

Cluster No. 19 multiple sequence alignment

CLUSTAL 2.0.10 multiple sequence alignment

```
113475397 YWIKSIIGEGNFCRTFLAVDELKPSKPFVQFLSQAQGSSENVEKA----AELFAEEGE
113475398 YWIKSLIREGNFCRTFLAVDEFQKSQPLCVIKQFILPYQKNE-----FAQEAE
113475316 YRPLNLIGQGGFGRTRFLATDEDEKPSKPYCVIKQFFPASQGTNNINKA----AQLFEKEAT
113477755 YRPLKIIGEGGFGRTRFQAVDEDEKPSKPFVQFLSQAQGTNNLEKA----AKLFAQEAE
17134417 YRAIKPIGQGGFGRTRFLAVDEDEKPSKPRCVIKQFYPPQAQGTNTVQKA----VELFTQEAV
113473984 YQVIKPLGESVWNHTFLAIDHDKPSKPPCIKEFVNLDDIKDLVFSQSEVIPTFFSCDPV
* . : :. : :** * * . : ** * :***: * : .. * :
```

```
113475397 KLKLLGKHPQIPELYTYFTVDSRQYLVQEFIQGKTLEQELDNYGVFNESQIREFLIDLLS
113475398 KLKLLGRHPQIPKTYTYFTVDSRQYLVQEFIQGKTLEQELNNGYVFNESQIRELLIDLLS
113475316 RLDQLGKHSQIPELMAHFTQDGRQYLVQEFIAGQNLAEALKIENSYNEDQIRGLLKNLLP
113477755 RLDGLGRHSQIPELLAYFTQNNRQYLVQEFIDGQNLKQELEESGAFSENQILELLKSLLP
17134417 QLDELGKHPQIPELLAYFTQDDRQYLVQEFIDGLNLAQELAHKGVFQETHIIQLLNDLLP
113473984 QLDKIGKHPHIPELLASIEHDGHHYLVQEYIEGSNLATELIEYGVFSESKIWQILNQLLL
:* . :*:*. :***: : : :. :*:***: * * . * * . :.* :* :* .**
```

```
113475397 LLEFVHSYDVIHQDIKPENIIRRET----DKKLVLVDFRISKIIPKFQRFNVTGTVLNSA
113475398 LLQFVHSYDVIHQDIKPENIIRRET----DKKLVLVDFGVSNIIPKVQRNTVTLTITGSA
113475316 VLQFIHSHNVIHRDIKPENIIRRQNS---DRELVLVDFGAAKYALGTALL-KTGTITIGTP
113477755 VLEFIHSQIIHRDIKPENIIRRRK----DNQLVLVDFCGAAKYATMTALG-RTGTVIGSA
17134417 VLQFCHNRQVIHRDIKPENIILRNS---DNKLVVDFGASKSATNTALN-HTGTSIGSP
113473984 VLELIHDHHLIHGDIKPENIICRRKQGTNTQEFVLVDFGVTSATGDLFS--IGSINGSA
:***: * . :** * :***: * . . . :***: * : : . . .
```

```
113475397 EYSPPEQSVGKLLASDLYSLGLVCLYLLTQMTPFDIYDVIEMEWVWRDFLNKTFISDNL
113475398 EYSASEKSIGKSHLASDLYSLGVVCLHLLTNIRPLNLYDVMEMEWVWRDSLNGNFVSDKL
113475316 EYTAPEQNRGKAVFASDLYSLGVTCLHLLTKISPFELFDVGEQWVWRRYLQNNISSEKL
113477755 GYVAPEQSVGKASFVSDIYSLGVTCLHLLTQIEPFDFDVSSENDWVWRDYLSQSN-VSNEC
17134417 EYVAPEQMRGRAIFASDIYSLGVTCLHLLTGRSPFDSYDTNNDTWIQQYLLKPP-VSNHL
113473984 EYAAPEQTQGVYPNSDIYSLGVTCLHLLTMVSPFELFDIKAEKWVWQDYLLKHP-ISRHL
* . .*: * : ** :***: .*: *** * : : * * : * : * : * .
```

```
113475397 GKVLDGLVELKLRKRYQNVQSVLDDL
113475398 GKVLDGLVEPKLRKRYQNVQSV----
113475316 GDILDKLVENAVNRRYQSADEV MENL
113477755 GEILDKMIVGATKKRFQNVGEILSVI
17134417 HKIINKMTASVPARRYQNVVEVLKDL
113473984 GRILDKMIQRDHRQRYQSAAEVIKDI
: : : : * : * . . : :
```

Cluster No. 20 multiple sequence alignment

CLUSTAL 2.0.10 multiple sequence alignment

6460339 YELLALLGEGGSAQVYRAQDGLLGREVALKVMHD-YLPESDR-SRFLREVRTLARLTHPG  
94985497 YVLLALLGEGGSAKVYRARDNRLDRDVAVKVLHP-HLPEGDR-ARFLREVRILARLTHPG  
108762507 YVLEDLAGRGGMGAVYRARDTLVGDVVALKLELGASPAEWLERFRREVRLARRITHRH  
83815929 YRLDAVIGRGGMGTVYRATDQALEKTVALKVIAPHLADDDTFVRRFREEAKALARLDADG  
\* \* : \*.\* . \*\*\*\* \* : \*\*::: \*\* .\*. : \*:

6460339 VVPVLDLGQEP-EAG---RPFFTMPLLTGGPITRLGPLED-APGPLARFLTAAAFASRAL  
94985497 VVSVLDLGETR-QANGTARAFFTMPLLTGGPITALGPLED-APGALAHFLTAAAFARAL  
108762507 VARTFDLGEHSG-----RLYLTMHEYVEGESLQTLMDREHTVPPARAARLVLALCEG--L  
83815929 IVDVYTLRETE-----EALFFVMEHVEGSPLETVLRRRGQLEPPQALSLLRQVLTAA--V  
:. . \* : :.\* : \* .: : . . \* \* . :

6460339 HHVHSHGIVHRDLTPGNVLLDDTGLPRIMDFGLVALSEQTRHLTRSGVTLGTPAYMAPEQ  
94985497 GYIHAQGIVHRDLTPGNILLDDAGMPRIMDFGLVALSEQSRQLTRSGVTLGTPAYMAPEQ  
108762507 AAAHAAGVVHRDLKPANVLVEARGRVLTDFG-IARALAGEGASRTQGLVGTMPYMAPEQ  
83815929 GHAHASGVLHRDLKPSNILIDADGQAVITDFGLAKILASDADLTATHDQLGTVAVYMSPEQ  
\* : \*::\*\*\*\*.\*.\*::: \* : \*\*\* : : : \*\* \*\*::\*\*\*

6460339 AKGGG-VDARSDLYALGAVLYRVACGSPPFVGD-SDQSVLYQHVVYEPVDPDRDLNPAVPD  
94985497 ARGVG-VGPRSDLYALGAVLYRVACGSPPFVGD-SDQSVLFQHVYKVPDPRDLNPAVPD  
108762507 LESGE-VDARADLYATGLVLYQLLTGAPPFAGD-SPMAVAVARLRQPPDPDR-LLAAVPD  
83815929 VKGLQNVDAASDLFAVGLLAYEVLTGRLPFDRSGSDFVQRAIVDASFPPSTHAPEVPP  
. . \*.. :\*\*\* \* \* : \*.: \* \*\* . \* \* : \* \* . \*\*

6460339 AVARVLLWLLAKRADRRPQSGAALHLWA---  
94985497 AVARVLLALLAKNPDDRPESEGAVAHLWA---  
108762507 ALAELVLACLSREPSGRPRDAACVADALRQWL  
83815929 AVEQVVDLLSKDPAARPPDARAALDRL----  
\* : .::\* \*::. \*\* .. . .

Cluster No. 21 multiple sequence alignment

CLUSTAL 2.0.10 multiple sequence alignment

116624299 YEIVALLGAGGMGEVYKARDTRLNRTVAIKVLS--ALPVADAERRRRLLQEARAASALKH  
116625880 YEILALLGAGGMGEVYKARDSRLDRAVAVKVLP--SGKVADSDRKRRIQEAKAASALND  
116626667 YEVVAPLGAGGMGEVYKANDPRLARSVAIKVLP--ESLARDGDRLLRRFIEAKAAGGLNH  
94969246 YEIRAPLGAGGMGEVYRAHDRRLDREVAIKVLP--SSVTDDPERLLRFEQEARAAGALNH  
116624825 YRISGKLGEGMGAVYRATDTKLDREVAIKILP--DAFAGDTRMARFTREAKLLASLNH  
116626062 YQITAKLGRGGMQVYAAHDSLELGRVVALKLLSGQTGSPGKMGSAERLIREAKAASALNH  
119717310 YRIGARIARGMASVYEATDIRLDRTVAVKVMH--PGLGDDDEFAARFVREARSAAARLSH  
\*.: . :. \*\*\*. \*\* \* \* . \* \* \*\*:\*: . \* : \*\* : . \*..

116624299 PNIITLHDILTED-GRDGLVMEYVEGRSLDERIAGK-RLPLREALCYALQIAGALAASHA  
116625880 PHIVAIYDISADA-GVDFIVMEYVPGKPLDQMIPOK-GLRTAETLRYAIQIADALAKAHA  
116626667 SNILVVDIGTEN-GVPYLVSELLDGESLRARLTG-KIPTTRAVELARQIASGLAAHA  
94969246 PNILAVYQFATDPTGVSYLVTLELDDGETLRERLKHG-PIPLRKAIEYGVQIANGLAAPHE  
116624825 PNIAAIYGVEDRA-----LIMELVEGHDLRG-----PLPTAIALNYARQIAGALDAAHE  
116626062 PNIVTVYDVVRHG-SEVALAMELVEGQSMREVCQ--POPVGQVIHVARQIVQALAATHA  
119717310 PNVVAVYDQGDH-GTVFLAMELVEGVTLRDVIRKESPMPPARALALIEPVLSALAAHR  
.: : : : \* : \* : : : : : : \* . \*

116624299 ANIVHRDLKPGNIMLSGEETGRGMVTVLDFGLAKFTGPESQEER-----TQAMATGEGR  
116625880 AGIIHRDLKPANLMVTDDQ----VKVLDVDFGLAKLIEPSIGAEAAAT---LTACDATEAGA  
116626667 RGIIVHRDIKPDNLFTRDGR----VKILDFGLAKVTPGEVVD-----ATRTLHTSAGT  
94969246 KGIVHRDLKPENLFITKDGR----VKILDFGLAKIGQAQSATVG-----PTLTRVTEPGL  
116624825 KGIVHRDLKPANIRITPDGV----VKVLDVDFGLAKLAEPVSDSADPSNSPTMTSSHTRAGV  
116626062 RGIIVHRDIKPENVMRLPDGY----VKVLDVDFGLARRTRLLEGAPS-----ASASLFGF  
119717310 AGIIHRDVKPENVLIAADGR----VKVADFGLARAVSAD-----TQHTATG-GV  
. \*: \*\* : \* : : : \* : : \* : : \* : : \* : : \* : \*

116624299 IFGTVAYMSPEQAEGRKVDARSDFISFGVVFYEMLTGRKAFRLRTTTTSTRAAILGDDLGP  
116625880 ILGTISYMSPEQAEGKSVARSDFISFGSVLYEMLTGQKAFQGDSKLSLTSAILREEPKP  
116626667 VLGTVSYMSPEQVRGQTVDRSDIFSGAVLLEMLTGEKAFAPTAADTMSAILNSDPAI  
94969246 VMGTVGYMSPEQVRGQVDYRSDIFAFGGILYEMITGKQTFDKPTSPDIMAAILNEDPRP  
116624825 IMGTAAYMSPEQARGHKVDKRADIWSLGVVLYEMLAGRKLFGGDTVSDTLADVLKTDPDW  
116626062 LGGTLYMSPEQARGENPTQASDFISLGSMLYELLCGVHPFQSASPIDTAYAI AHHEPKR  
119717310 LIGTVSYLAPELVVDGRADARADVYAAGVVLFEMLTGGKPHEGETPIQVAYKHVHEDVPA  
: \*\* . \* : : \* . . : \* : : \* : : \* : : \* : . : . : :

116624299 ----APGIPESLQTLRSRCLRKDRDKRAQSMADI----  
116625880 IAQIAADIPRDLGKIIQRCLRKDPDRRFQHM-----  
116626667 SPEDEAAIPTAHLRTIRHCLEKNADDRFQTCCKDL----  
94969246 ISQVVPSTPPGLQRVVSRCLEKNPEQRFQSSSDL----  
116624825 S-ALPPDTPPAIRLLRRCLERDRKQRLADIADARLEI  
116626062 AGSVRPEISAALSSLVAAMMAKDAADRPAAVELEQLL-  
119717310 PSTLEPGIPAYVDALVARATARDRGLRPADAGVLLHQL  
. . : : \* :

Cluster No. 22 multiple sequence alignment

CLUSTAL 2.0.10 multiple sequence alignment

116669855 FTYVSLGSGGFSDVYLYEQDRPRRKVAVKVLLSDLKTEGARRRFESEANLMAQLSSHYPY  
119962082 FKYISLLGSGGFSDVYLYEQDRPRRKVAVKVLLSDLKTEGARRRFESEANLMAQLSSHYPY  
119026328 YTLIKRLGSGSEADVYLYQQLSPARQVAIKISKNTLDPR-AAVRFSEANFMGQISTHPY  
23326452 YDFVQMLGSGATATVYLYNQRMPPARPVAVKASAKTLDPR-AAALFNREANFMAKLSSHYPY  
: :. \*\*\*\*. : \*\*\*\*:\* \* \* \*\*:\* . \*... \* \*. \*\*\*:\*.::\*:\*\*

116669855 IVTIFEAEVTEDGHSYLAMEYCSRPSLDVRYRRQRFSVDEVLAVGIQVASAVETAHRAGI  
119962082 IVTIFEAEITETGHSYLAMEYCSRPSLDVRYRRQRFSVDEVLAVGIQVASAVETAHRAGI  
119026328 ILSVYENGVTVNGRGYTVFEYAPGGNYKTFLEHGRLTADQMLTVGIDLASALFTAHRKGI  
23326452 ILPVYGAGVTSDGHGYIVIEYAPGGTYNSIMKARSMTCEQVLDLGIKLSSALFTAHRJNI  
\*:.::: :\* \*:.\* .:\*\*\*. . . . . : : :\*: \*:.:\*\*\*: \*\*\*\* \*

116669855 AHRDIKPANILVTDYNRPALTDGFGISGTLGSDTDEDAGMSIPWSPPEQFRDGPVDGVMVD  
119962082 VHRDIKPANILVTDYNRPALTDGFGISGTIGADTEDDAGMSIPWSPPEQFRGGAVDGVPVD  
119026328 IHRDIKPSNILINAHNMPMLADFGIAGTVYGRPG--VGFTIAWAAPVLAQGGGNESSD  
23326452 IHHDIKPSNILITSQGLPVLGDFGISTDVYDRTE--TGFSPPWAPPEVLQHLTNGSEAAD  
\*:\*\*\*\*:\*\*\*:. . \* \* \*\*\*\*: : . . \*\*\*: .\*:\*\*\* : .. \*

116669855 VWALGATLYTLLAGRSPFVLP-----GADNSQRE-LISRITNSPVPRLGRADVPESE  
119962082 IWALGATLYTLLAGRSPFVLP-----GQDNSQRE-LISRITNSPLPRLGRADVPESE  
119026328 IYSLGATLFAMLIGQSPYEYFYADVLGDSQRQVRAERLKSIVLNNPLPKLNRSVPAEVE  
23326452 IYSLAATLYAMFVGCSPFQH-----DYHPRSQSE-LISLIVNQPLPRLNRPDVPADVE  
:::\*.\*\*\*:\*\*\*: \* \*\*: . : \* \* \* \* \*.:\*:\*.\*\*\*.\*\*\* .:\*

116669855 LALATAMAKSAASRYSSAHAFALALQRI--  
119962082 LVLATSMAKSPESRYSSAHAFALALQRI--  
119026328 WVLRKALSRAPEDRYSSALEFARM-----  
23326452 AVLRRALNKDPDQRYSSALEFARAMQRVQF  
. \* : : : . \*\* \*\* \*\* :

Cluster No. 23 multiple sequence alignment

CLUSTAL 2.0.10 multiple sequence alignment

```

109899780      YRVVRSLSHSARSHVYLVDDERTHKQVWLKTPSVDLSDSDEYLERFCLEEWIGRRIHNAH
83645934      YQILRCLQTSRRSHVYLALDIVSKTKVVIKTPATDQOGDPAYLERLLMEEWIARRINSLH
90022467      YIILRELHFTRSRSVYLAQDKQTKHNVVLKVLSTELSNTSASLERFLEEWWARRINSSH
91774686      YHILRELHHSRSHLYLAIDNATGQQVALKTPSTDLVANPAQLNRFAL EEWWARRLNHAH
119897469      FTIVRELQVSARSHVLLATDKDGRPVVLKAPSVDLRGDAAYLDSFVLEEWWARRVDSPH
120553124      YRIIRALHISSRSHVYLARDERSGKQVAIKFPAMELRQYPDELERFVTERWIAQRVQSPH
114798196      LRILRKLHANARSHVYLVLDPAHRRLVLKAPAAELCADPVLLRRFMEEWWARRVSSPH

```

```

      ::* *: . *:: * . * :      :* : :      * : *.*::*: *

```

```

109899780      VLHVPPAEHPKQYIYCVAEYVEGQSLSQWLTDNPKPDLEVVIRGII EQVAKGLQAFHRLDM
83645934      VAKAAQFERPRAYLYTVSEYIEGRTLSQWLRDHPRPDLETVRGIVEQAARGLMAFHMDM
90022467      VLKADLPDRKRNIIYTVFEYIEGQTLAQWALDNPCKLEIVRDIIEQI AKGLQAFHRMEM
91774686      VLKPCRKREKPOYLYVAMEFIEGITLAQWMRDHPRPSLETVRGIVEQI AKGLQAFHRAEM
119897469      VIKAWPGERRRRHLYVAMEYIEGQTLAQWMTDHPAPPLEAVRAIVEQLAQGVQALHGRDM
120553124      VVAIFAPERPQSCLYLATDFVEGCTLRQWMLDHPQPDLETVRQLAEQIARGLRAFHRLEM
114798196      IVPAADLGRARSYLVLLEFVDGQSLRQLMNDQPELPLETVRTLLEQIVAGVRALHRKEI

```

```

      :      :      :*      :::* * * * * * * * * * * * * * * * * * * * * *

```

```

109899780      LHQDIRPENIMIDRKGTVKIIDFGSTTVAGLQEI GQCGNSELLGTALYMAPEYFLGDVG
83645934      LHQDLKPDNLMIDASGIVKIIDFGSTRVGGVAENDQGV RQPNLLGAALYAAPEYFLGVEVG
90022467      LHQDLRPNENIMLDKDGTVKIIDFGAVSVAGLNEAVLFNPD TYLQGTALYSAPEYFLGQPG
91774686      LHQDLRPNENIMIDRNSVVKIIDFGAVRVAGLEESHPLESLP-VPGA IQYMAPEYFLGEPG
119897469      LHRDLRPNENIMIDRDGTVKLIDL ANVHVAGLAEGRGGAEQGAPPGTLQYMAPECLLGQPA
120553124      VHQDLKPENVLITPDGRAMLVDFGATRVAGLEETG-KPAACY PVGAALYSAPELFLGEPG
114798196      AHGDLRPNENILIDGTGGVQLIDFGSAHVAGIADSAIALPPA-ALGALQYAAPELLLGEPP

```

```

      * *::*: *::: . . :*: . . *.*: :      *: * * * * * * * *

```

```

109899780      TSRSDFISLAVLAYHMLSGRFPYATHVAKTRTRAQONRLIYQSVRDEKSPVPAWL DATLA
83645934      SPGSDLYSLGVLTYHMLSGGFYPYADVAKTRTAGAQKRLTYKPV LSEERDIPAWIDATLK
90022467      SPRSELFSLGVITYFLLSGEYPYGTNVPKAKTISAQRNLWYNSLLSDDSEIPAWVDDAIR
91774686      SPQSDQFSLGVIA YQMLTGKLPYGAQA AKIKSRTQLQRLSYLSAIDGHNGIPSWIDDALA
119897469      STAADLFLAAITYQMLCGQLPYGLSVTRVRTQQDLRNLRYVPLRHHRPDLPAWLDGVLA
120553124      SWQSDQYALGVIIYQLLTGRLPYHTDVPRI RTRKQLQALTYRPARAWREDLPPWL DATLA
114798196      GRASDQFAIGVIA YELLTGRLPYGAAGGKVRSDKNRRALTYQPATRAGQPLPAWINGALR

```

```

      :: :*: . * * * * * * * * * * * * * * * * * * * * * * * *

```

```

109899780      KALKVDPFKRYAELSEFIHDL
83645934      RAVHPNPHKRYTELSEFLHDL
90022467      KAVHPLPDRRQEEIFEYI---
91774686      KAVHPEPHKRYPALSEFMHDL
119897469      KALQVAPAKRQEAVSEF----
120553124      RATHPEPHRRYPALSEL----
114798196      TATDPLARRRYEALSEFLADL

```

```

      * . . : * : *

```

Cluster No. 24 multiple sequence alignment

CLUSTAL 2.0.10 multiple sequence alignment

113474475 YQVLRILGQGGMGTTYLAWDQEPHNFQGMVSPAAALVVLKEMNADMAQIRKAQELFERE  
17129893 YQVLRITLGQGGMGTTYLAWDAA-----GVIVG-HPKLLVLKQMNADMARIAKAQELFERE  
22298671 YHILRLLGQGGIGRTYLACEAQS---PGEWIGKVPQVRVLKELRSEMADNEKAQELFERE  
37523676 YERVATLAQGGMSTTYLVFNHQN-----DRLAVLKEIDADLSRKAKARELFLRE  
\* . : \* .\*\*\*:. \*\*\*. : : \*\*\*:: :::: \*\*:\*\*\* \*\*

113474475 AKALKLLSHPGIPKFFDFVVEEDKKYLVMEIIHGQDLEKRIITQGPILPQQAIGWMVQTC  
17129893 AYTLKSLDHPGIPRYYDFVVEGGKKYLAMELVHGQDLEKRIYATGPVIPSIAIAMIQTC  
22298671 ARILQLLDHAGIPRFYDFVVEDGKSYLVMEIIGHIDLERWVLRNGPVRIPQAVQWMIQTC  
37523676 AQVLAELDHGGIPRFYDYFSSDERHYLVMEMIHLTLEQVQPRS----AAQAAGWMIQTC  
\* \* \*. \* \*\*\*:::\*\*\*. : \*.\*\*\*:\*\*\* \*\*: \* \*\*:::\*

113474475 EVLEYIHSQEPPLIHRDIKPANLLVRRRDNQIVVLDVDFGAVKEIGTPLGTRIGAEGYSAPE  
17129893 DILDYLHRQEQPLIHRDIKPANLMVRTANNQIAVLDVDFGAVKEIGTTPGTRIGAEGYCAPE  
22298671 GVLVYLNQEPPIHRDLKPSNLLVRSRDNQIVVIDVDFGAVKELGHSP-TRIAVEGYSAPE  
37523676 NVLVYLHGLQPPVIHRDIKPANLILRYNPREVVLDIDYGAVKLAGGRQGTTRIATPGYSPPE  
:\* \*\*:\* :\*:\*\*\*\*:\*\*\*:\*\*\*:\* .:::\*\*\*:\*\*\*\*\* \* \*\*\*..\*\*..\*\*

113474475 QDRGQPLTQSDLYAVGATLIFLLTAKSPMHFYDNHGNGYRFYIENVPNITPQLREVIEKV  
17129893 QERGQPLTQSDLYAIGPTIIFLLTGENPFKFRYRQKGRGFRFDVSKIPTITPKLRDVIERT  
22298671 QMMGKPTLQSDLFVAVGATLAFLLLDGHPHPIRFYHHRQGYHRLDVS DRPEIPDPVKEVIHRA  
37523676 QGRGRPCLQSDIYGVGMTLVFLLTRQFPGRFYHPRER--RLVGLLEEAGIEAPLAAVIAKA  
\* \*\*:\* \*\*\*:::\*\*\* \* : \*\*\* . \* \*\*: \* : \* . . \* : \*\* :.

113474475 TQPLPRDRYKTAPALAEALNS--  
17129893 TEPLPRDRFQSAKELAAAL----  
22298671 TAPLMSEYPSAVALAKALRQAL  
37523676 TAYLPQERHRDSQELAHALAPF-  
\* \* :\*. : \*\* \*\*

Cluster No. 25 multiple sequence alignment

CLUSTAL 2.0.10 multiple sequence alignment

```
119944475    YEILREIYISSRSHVFLALDSESGQTVVIKTPSTELRNNRQYLESFMLEEWIAKRLNNPH
71906459    YQIVREIKGSSRSHIYLAVDSESGEKVVIKTPSINLQGDPAFLERFLMEEWIARRINSAH
27351057    YRIVREIHGSSRSHIYLAVDAETEGPVALKLPSIDLRDNAAYLKRFLMEEWIARRIDSPH
83648458    YRVDRILHESARSQVYQVTDMETGERAVMKTPSLNFVDDPAYIERFTMEEWIARRVHNP
90021924    LQVEKILHESERSQVYLVKD-ENGTYPVMKTPSINYDDDPAYIERFVMESWIGTRIQNH
83646708    LVVEEEIFASSRSQLYLVRDQDSGERVWMKTPSRNYLGDVSYIDRFIQEEWIGKRIDNPH
      : . : * **::: . * :. .:* ** : .: *:. * *.** .*:.. *
```

```
119944475    VAKAIEPTRKRNFLYLVEYIDGITLTQWMTDNPKPTINQVRKII EQTAKGLQAFHRQEM
71906459    VLKPCLOTRKRHYIYVVTEFIEGQTLQWMLDNPKPDLASVRGILEQAAKGLQAFHRLEM
27351057    VLKPMQSRRRSYLYVATEFIEGQTLRQWMLDNPDPLETVRGIVEQIATGLRAFHRMEM
83648458    VAGLVPCRRARSCLYYLTFVPGAPLSRWIRDNSRSDIHRVTRILEQIVKGVRALHRKET
90021924    VVRIATPPESRSTLYYLTEHIAGPTLGLQIRERAPMDITDAVELVEQLAKGVRAFHRRT
83646708    VVRIIEQPQARTCLYYLMEHVEGVTLQQWIKDHPFPKPKTAFALIAQVADGLSALHSQDT
*      . * :* *. : * .* : : :.. . : : * . * : * : * :
```

```
119944475    IHQDLRPNNIMIDCANNVVKIIDFGSTFIAGVTDIKN---EEAVRGTMRYSAPPEYFLGEVG
71906459    VHQDIRPDNIMIDSTGTVKIIDFGATRVAGVMEIATPIEQINLLGSATYAAPEYFLGENG
27351057    LHQDLRPDNLVIDKTGTAKIIDFGSVRVAGVAEAPKSADEEILGTVQYTAPEYFLGEGG
83648458    LHQDIKPDNLLIGNDDHVTLVDFGSCRIPGVEEMYLPPIERERALGTASYSAPPEYVLGAKA
90021924    LHQDIKPDNVIVGRN-GAVIIDFGSCYVAGVHEVASSFERDKILGTLTYSAPPEYRCGGNV
83646708    IHQDLKPANIIVSPDNRATIIDFGSVYVAGVAEVFRPLEHIAALGTASYSDDLPLLLGQNT
:***::* *:::. . :***: :.** : * : * * * *
```

```
119944475    SSRSDIYALAVITYQMLSGRFPYHAEIAQVRSLSAQRRLIYKSLINDDIEFPIWIDDTLR
71906459    SSRSDIFSLGVIAYQMLSGRLPYGVEVAKSRTRAAQRKLQVYQTVLNDEKEIPAWVDDAIR
27351057    SPRSDMFSLAAICYHMLTGHLPGYGAQLAKIRGRSDAWKLRYPIDAERGI PGWIDGALR
83648458    TTRSELFVAVIGYEMLTGHLPGYGEAYEKAASPTALAKLKYTPAYHHNPMVVPVWMDGALK
90021924    GMHSDQYSIAVILYEMLTGKLPFGEAYSEASSLKDFQKLKYHPARIHNPLVPVWLDKALE
83646708    GARGDLYALATIAYEMFTGELPYGDQINECRSRFDYDRLRYRSAMQFNPIPLWFDRALQ
      :: :::..* *.**::. * : : * * . : .* *. * ::.
```

```
119944475    KALNVEPLKRYEELSEFV---
71906459    KAVDPDPFFERYEELSEFV---
27351057    KALHPDPYKRHEDLSEFV---
83648458    KALQLDPRRRYDSFSEWLQDM
90021924    KALSLQTSARYPALSEWL---
83646708    KGVAFDLDQRYQTMALLQDL
*.: : * : :. :
```



Cluster No. 26 multiple sequence alignment

CLUSTAL 2.0.10 multiple sequence alignment

```

54026216      YELRSLLGKGGMGEVYEAFTSRHRLVAVKLLADELAKDPVYQERFRRESQAAARLAEPH
86742304      YVLHEILGQGTGQVWRGAAVSDGAPVAIKVLRPELADDPEIVERFLREWDLIDLDSPD
29831644      YTANQILGRGSAGTVWLGEGP--EGPVAIKLLREDLASDQELVGRFVQERTALLGLDHPN
50843112      YVLDDVLGRGSMGTVWRGHDLDNGSPCAIKILNPTLTDDKGATRRFIDERDIFMSVDDDA
*      .:***: * *: .      *::: * *: *      ** *      :

54026216      VIPIHDWGVLDGVLFIDMRLVAGTDLRMLHHT--GPLEPERAVRLVEQVAAALDAAHAD
86742304      LVAVRDLVNEPDVLAIVMDLVDGPDRLRTHLREF--GPRPVEEAVRLVVGTLWALDSVHAA
29831644      VVSVRDLVVDGNDLALVMDLVRGTDLRTRLRE--RRLAPEAAVAIVADVADGLAAAHAA
50843112      VVRVTDMMVESSTFAIVMELVDGPDLAQVLKSLPDHRLDQGTAVSLGIEVCQALAAIHRV
:: : *      . : : * ** *.** *      *      ** :      . . * : *

54026216      GLIHRDVKPANILVTDADFAY-----LADFGIAHTEGDSAITQVGMAVGSYIYMAPE
86742304      GVVHRDVKPENILIDTSDPAHP----IVRLTDFGIAQMINGSRRTSVTGPIGTPLYMAPE
29831644      GVVHRDVKPENVLDMQGPLGPGGSHPALLTDFGVAKLIDSPRRTRATKIIGTPDYLAPE
50843112      GIRHLDIKPANILIEDPENVS-----ARITDFGVSEVVAFHG---PREVVGTPYYQAPE
* : * * : ** * : * :      : : * * : : .      : * : * * *

54026216      RFDSGTVTGRADIYSLACVLHECLTGAAPFPSASMNVLVKAHLSEPPPRASALRPGLPAS
86742304      LSTGAPPTPAADVYSAGVVLYELLAGSPPFDSPNPAELLQAHREKQP----QPIQGVPA
29831644      IIEGLPPRASVDIYALATVLYELLAGFTPFGGGHPGAVLRRHVTVTV----VPLPGIPEE
50843112      VAAGWTPTAASDLYSFGVTLYEILAGHMPFQANSAGNLLRNQ---PP----PAIPGVDP
. .      * : * : . . * : * * : * * .      : : : :      * :

54026216      IDAVIARGMAKNPADRF-ASALEM-----
86742304      VWGVLGMLAKSPRGRP-VSAADAAEDLVEAL
29831644      LWQLLVQCLAKAPASRLRASELGARL-----
50843112      LWNTILTCLAPDPSQRPDSEVLASELR----
:      :      : * * *      :

```

Cluster No. 27 multiple sequence alignment

CLUSTAL 2.0.10 multiple sequence alignment

```
116669657      YRLGEVIGRGGMASVYSARDENLGRDVALKLFAPQSADADELKRQEAEIQLLATLNHPSL
119964125      YQLGPVLGRGAMSTVYRAKDLLLGREVAIKIFLPGSGDSSFRGRQENEMRLLAGFDHPGL
116668760      YRIEALIGRGSQSGVYRAFDELLQREVAVKLFRRDDPGNLDHTRRQGEVRIAGMSHHAL
117927604      YELRTLVGHGSMGEVYAAADRRLDRVAVKVLRRDTTTTASAAERLRQEMRVLAQLDHPHI
                *.:  :*:*. . ** * * * * **::: . . * *:::** :.* :

116669657      VTLFDAGIDSRVPEEPRPFLTMELVEGQDLRSRIRHSPVPLDELAVIGAGVADALAYVHS
119964125      VAAF DAGVDTRNDEE-RAFLVMELAEGRDLRAVLSDGPLTVPETARIGIRIAGALSQVHE
116668760      VTLLDAGADFSDPRHRRTYLVMELVRGPDLRARAAQGPINA AHLALIGHDLADGLAYIHH
117927604      VDLLDAGFR-----DHTTYLVLRWIDGQSLAEVLTHGPLDVTRTAAIAAQADALAYLHS
                * :*** . .:*.:. * .* ..*: . * *. *..*: :*

116669657      LGIIHRDIKPANILLVQVR-PGEPLRPKLTDFGIARIVDGTTRLTATGTMVGTAAAYLSPEQ
119964125      HGVIHRDIKPANILVSDD--DGLAQTVKLDADFGVALVMNDNRLTATGFTVGT AQYLSPEQ
116668760      HGIVHRDVKPANILLVDYNNDDRRRPRAKLSDFGVAMILGDGNRTGPAESSGTPQYLSPEQ
117927604      RGIVHRDVKPANILLDAAD-----YAYLTDFGIARFADATRLTATGQTIGTASYLAPEQ
                *:***:*****: *:***:* . . . *... **. **:***

116669657      ARGADLGPASDIYSLGLVLLECIKAAVEYPGSAIESAVARLHRAPEIPGDVPAEWATLIR
119964125      AQGLSLTPASDIYSLGLVLLECLTGRAEYPGTPIETASARLHRAPQVPVELPGLRELLE
116668760      AASEPVGPPSDVYSLGLVLLEGLTGNPVYPGAPIASAMARLLRDPHIPDVVAPKWAALLS
117927604      VRGGAVGPAADVYALGLVILECLTGRREYDGTPEAAVARLTRPPRIDVGTTPGLRPMLA
                . . : *.:***:*****:** :.. * *.: :* *** * *.: . :

116669657      SMTALEPMDRPTAPDLETAL
119964125      AMTDM DPEKRPTAQHVEQAL
116668760      SMLSREPSARPGARDVSLAL
117927604      AMTATDPAARPSAVQVARFL
                :* :* ** * .: *
```

Cluster No. 28 multiple sequence alignment

CLUSTAL 2.0.10 multiple sequence alignment

145590326 YKVIRLLGVGGFSYVLLVKFKKSMYAVKILRFADDQGAPLAGDENILYLFGQEMNRYLEL  
18312200 YKVIRLLGVGGFSYVLLVRQKGKVYAAKILRYADDYGVPLASDENILRIFGYEMNRYLEI  
119872609 YKVVRLLGVGGSYVFAVRHKKSIYAVKILRYVDDYGNPLASDENILRIFGQEMQRYLEI  
126458653 YKVVKLLGVGGFSYVLAVKRGGKIYAAKILRYTDDYGVPLAGDEKVLAFFGQEMNRYLEI  
\*\*\*:\*\*\*\*\*: \*: .:\*\*\*.\*\*\*:.\* \* \*\*.\*\*\*:\* :\*\* \*\*:\*\*\*\*:

145590326 KSDHVVRAYEVYLPVAVGYKDIGQYMRNPPYILLEYMDGGTLRDLLRAKKRLPAGYVAELF  
18312200 KSDYIVKAFEVYLPVAVGYRDIKQYMKNPPYILLEYMEGGTLRDLLRARKRLPVQQVIELF  
119872609 KSDYVVKAYEVYLPVAVGYRDVVQYMKNPPYILLEYMEGGTLRDLLRTRKKLPVAQVVVELF  
126458653 KSERIVKAYEVYLPVAVGYKDLRHYMRDPPYILLEYMRG-TLRDVLRIKKTLPVPQVVEFMF  
\*\*: :\*:\*:\*\*\*\*\*:\*: :\*:\*:\*\*\*\*\* \* \*\*\*:\*\* :\* \*\*. \* \*:\*

145590326 RQLAQGLYDIHRNRIIHLDIKPENILFTKDRKVAKIGDMGIKVAIGGRVQSSFMSPAYA  
18312200 KQLAQGLYDIHKHNIVHLDIKPENIMFTRDRKIAKIGDMGIKVVTTGGYVHSSYMSPAYA  
119872609 RQLAQGLSDVHRHNVVHLDIKPENIMFTKDRKTAKIGDMGIKVVSGGYVRSSYMSPAYA  
126458653 KQLAAGLYDIHRHNVVHLDIKPENIMFG-EGGVVKIGDMGIKVVAGGYVHSSYMSPAYA  
:\*\*\* \*\* \*:\*:\*:\*\*\*\*\*:\* : .\*\*\*\*\*. \*\* \*:\*:\*\*\*\*\*\*

145590326 APEVKNGEASFSSDIYSLGCVIYEALTGINPNVFEVNGYAIPPPSAYAADIPPWMDEIIL  
18312200 APEVKKGLATFSSDIYSLGCVIYEALTGINPNVFEVNGYQIPPPSAYVADVPRWIDEIIL  
119872609 APEVKKGLASFASDIYSLGCVIYEMLTGINPNVFEVNGYQIPPPSTYNPEVPTWLDQLVL  
126458653 APELKRGVASFASDVYSLACVIYEALTGINPNVFEVNGYPVPPSSYNKEVPPWLDDELLL  
\*\*\*:\*.\* \*:\*:\*:\*\*\*.\*\*\*\*\* \*\*\*\*\* :\*\*\*:\* ::\* \*:\*:\*:

145590326 KMLDLDPAKRPTVADLVSFI  
18312200 KMLDLNPNARPNSAELVNYL  
119872609 KMLEVEPTKRPSAEEIVTFL  
126458653 KMLAPDPARRPSAAEVLKAL  
\*\*\* :\* \*\* . :\*:\* :

Cluster No. 29 multiple sequence alignment

CLUSTAL 2.0.10 multiple sequence alignment

```

108758818      YLVLERLASGGMGVVYSAYDPELDRRVALKLLRVAALGLEAEQGRAHLLHEAQAMARVSH
108763383      YLLQGVLGMGGMGVVYAADDLRLGRRVALKLLRPLLAGAOD-QGRERLLREAQAMARLSH
86159218       FEIVRELARGGFGVVYAARDRTLGRSVAFKLVPSAASGAAD----DRVLREAEAAAARLTH
119960545      YTVR SRLASGGMSTVYLATDQRLERDVALKVLHPHLANDPT--FLERLSREAKAAAASLSH
                :  :   *. **:..** * * * * **:::   .           :: :***: * * :*:
    
```

```

108758818      PHVVPVYDVGTFGPQVFLTMELVDARTLRPWLKD-APRTWRQVLALFLDAGRGLAAAHAA
108763383      PNVLPFLFELGTAEGHDFLAMEWVDGTTLADWLRE-RERPWRDVLVDVFLAAGAGLAAAHRA
86159218       PNIVTLFDVGRCAAGPYLVLELLRGETLAARLRR-GPLPLREALRVAEAVARGLAHAHEA
119960545      PHIVGVLDQGEDGTIAYLVM EYVKGHTLRDRTLNEQ GALQPRLALALIDPVIEGLAAAHRS
                *::: : : *           :*:* : . ** * . * . * : . *** ** :
    
```

```

108758818      GVVHGDFKPENLLVGQDGRVRVTD FGLARN-----ANPLDDVSP-----LAGG
108763383      GVVHRDFKPSNVLVGRDGRVRVTD FGLARRGTGESPEAPAGVSEGASKASMLTEWGOAAG
86159218       GVFHRDLSPGNVFLCEDGQVKVLD FGLAHA-----FGRPR-----TAGG
119960545      GLIHRDVKPENVLIADDGRIKVGDFGLAR AIS-----ANTSTG-----ALIG
                *:. * *..* *:::   **:::* *****:           . . *
    
```

```

108758818      TPAYMAPEQMEAHAPADARSDQFAFCVTLFEALYGERPFAATTPHELLTE-VRAGKVRPA
108763383      TPAYMSPEQRAGRA-VDARGDQYSFCVALHEALHGERPGHLAAS-----AA
86159218       TPQYMAPEQRRGAP-EDERTDV FALGAILFEMLTGEQPFPSAAPG-----RTPRRAPA
119960545      TVAYLAPELVLGQP-ADARSDIYSAGIMLYEMLTGKQPYAGDSP IQVAYQHVNAAVGRPS
                * *:::** . . * * * : : * . * * *:::* :.           .:
    
```

```

108758818      PRGTHVPPWLRRVLLRGLSASAMDRYTDLNALLVALQH-
108763383      PRTSSVPRHLRTALARGLANAPEDRFPSMEALMAAL---
86159218       LQVPDLP-ALADLLGRMLAADPVR RPRDGGAVVAALGAL
119960545      DAAPGLAEDLDELVQWCTAVDAENRPVDGTALLTEL---
                . :. * : : . * . *::. *
    
```

Cluster No. 30 multiple sequence alignment

CLUSTAL 2.0.10 multiple sequence alignment

```
108759654 YRVLGELGRGGMALVYRGLHEMLQREVAIKELLP-DGQRDR---ETLSRFREALALAAF
86156646 SRIVREIGRGGMGVVEAFQEGLERPVAVKALDQ-KLVRSS---EVVERFRREGRAYAQL
116619364 YQVVGILGAGGMQVYKVRNVIDRVEAMKVLDP-DLVNQP---DLADRFLREIKVQASL
108803345 YVVRERLGSGMAVVYRAEDTLLGRDVAIKTLHR-RYAEMP---AFRRRFRQEARAMASL
120404511 YRVDSLIIATGGMSAVYRGLDQRLDRPVALKIMDS-RYAGDQ---DFLTRFQREARAVARL
116619720 YEILSALGAGGMGEVYRARDARLGRDVALKVLPA-EVASDP---TRRQRFIEARAI AAL
116622428 YEIRAPLGAGGMGEVYRARDTRLGRDVALKILPP-ELAEDP---SRRARFEQEARAVAAL
116620277 YEIIAPLGAGGMGEVYRARDRLRDREVALKLLPP-HGD-----RSRFQAEAKAVAAL
116623521 -----MGEVYRATDTKLSRDVAIKVIPE-NFAADA---DRMARFAREAQVLASL
116624929 YEILGRLGAGGMGAVYRARDSRLHREVAIKVAAA-KFSD-----RSAREARTVAAL
116620426 YRLAEKLGEGGLGAVYRARDIRLGRDVALKFLQP-ALAQDE---GRRERFLNEARAAAAL
94968763 -----MGVVYRAEDTRLGRQVALKCLPA-EYAADP---QMVERFLREARSASAL
71906078 FKITGTLGQGAMGTVYRAHDPLIERTVAIKTVAC-AGLSKDEALAFEQRFYREAKSAGRL
32471474 YQIESVIGRGGMGSVYRAKHAKSGEEVAVKLI AQ-HVADDMR---FRRRFDAEVELLRRRL
21220218 YRLLSPLGEGGMGTVWRARDEVLRREVAVKEVRAPAGLSQPDVGRMYARLEREAWAAARI
      :. *:. . . *:* * *
```

```
108759654 RHQNIIVTLYDMVEKGESLFMVMELVDGPTLHTLIKEG-PLPADVTGVIAARIAS---ALD
86156646 RHEAIVAVHDLVEKDDQLYLVTDLVDGADLARVLAQGGALPADCVAVIGARLAE---ALD
116619364 EHPNIAALHTAVRVDNQLMLMEFVEGVTLTDQKLNKGPLPPANAVDHIMQVLA---ALE
108803345 DHQNIIVKVYDISPDGEAPFIVEEYVGGRLDGLSLLSRQGRLEEPFAVRVAVQ-LLKALA
120404511 KDPGLVAVYDQIDGQHPFLVMELVEGGTLRELL-RERGP--MPPHAVAVALRVPVLSGLA
116619720 NHPNIVAVYDVGSESGVLYIVTELVEGETLVGAKA-----GLRKTIEIAVQIA---GGLA
116622428 NHPNIVAVFDVGDG----YMVSELVEGEPLRASHP-----GLRKTLDLAGQIA---SGLA
116620277 SHPNIVAI FVDGEN----YLVTDELVDGHPFPVPTT-----PLRRLDLAVQIA---DGLA
116623521 NHPNIAAIYGV EER----ALVMELVEGQTLAELIAQ-GAMPLAEAVPIARQIA---EALE
116624929 NHPNICHIIYDVGPN----YLVLELVEGTTLAERLQK-GPLPIEEALAIARQIG---DALE
116620426 NHPNIATIHSEIEDDGS LFI VMELIEGQTLRQLSGG-RPMLARALQYCTAAA---DALR
94968763 NHPNIATIHSEVDVANGQHFLTMELLEGQSLRLDRIAS-GPIATDESIRIAVAVA---DALD
71906078 SHPNIVTIHVDGRNESLAFIAMEYLNQSLRELLDSGVVLPPEPCTEIAADVA---DGLA
32471474 RHPGIVRLIGYGEEAGQLFYSMELVRGETLQKRIRDVKRLGWLPTLDIASQVCS---ALK
21220218 SHPNVVTYVDVATDGGRPWIVMELVRGLSLADLLDAEGPLEPRAALIGAEVL---AALR
      . : : : : * :
```

```
108759654 HAHFRHIIHRDLKPANVMLTKSGEVKLMDFGI AKDVGMEALT-----QQ
86156646 YVHWSGLLHRDVK PANVMISRLGEVKLMDFGI AKGAEDPSLT-----RV
116619364 YAHARGVVHRDIK PANMMLTPSGAMKLMDFGI ARSSADHKL T-----QT
108803345 YAHWRGVIHRDIKPSN IITPGGIVKVADFGIARLVEEDGE-----GD
120404511 AAHSAGLVHRDIK PENVLISDDGEVKIADFGLVRAVAEAKIT-----ST
116619720 AAHEAGIVHRDLKPSN IVLARDGRVKILDFGVAKVTPAIAA-----GAAITETITVNTRP
116622428 AAHAAGIVHRDLK PENVLTKDGRAKILDFGLARIRRNAAV-----ASQTETATVKTEP
116620277 AAHAAGFIHRDLK PANILLSRDGRAKILDFGLAKRVGGLQS-----DSNQTQTA---TQA
116623521 YAHEKGI IHRDLK PANVKVTPEGRVKVLD FGLAKALASEGPVSGDPQSSPTMTMR-ATMA
116624929 AAHERGIVHRDLK PGNIIVRPDGTVKVLD FGLAK-IVEETPPEGDP EHSPTVTLEQLTRA
116620426 AAHHKGI IHRDIKSSN IMVTAEDRVKVLDFGLAKLPES SLV-----TQENI-----
94968763 AAHEKGI VHRDIK PANIFLTERGEAKVLD FGLAKLESSNLA-----MSATVDANLTSP
71906078 FAHANGVVHRDIK PANIMVL DNGSVKISDFGVALIPSGSTT-----VE
32471474 HAHDIGVIHRDLK PANLILT DAGEVKLVDFGI AKLFGFGEQT-----LH
21220218 AAHAAGVLHRDVK PANVLLANDGRVVL TDFGIARVEGSEALT-----MT
      .* .:***:*. *: : . : ***:.
```

```
108759654 GMAVGTPSYMSPEQVTGVPV-DGRTDIFSLGVLLYEALSGARPFHGKTAGEVFAKIRDGK
86156646 GMLVGSPSYMAPEVLAGDEG-GPAADVWALGVTL YELVCGEKPFRRGANADELFRVRRGR
116619364 GTTVGSLYMSPEQIQGVVAPDARSDIYSVGVSLYELVTGKRPFDDGDSQFAIMSAHLA GT
108803345 GEIIGSARYMSPEQLRGL EA-TQRSDVYSVGVLLYHCLTGRPPFSGDVRSLVR-OHLREA
```

120404511 SVILGTAAYLSPEQVATGET-DSRGDVYSVGILVYELLTGRTPFTGDTALAVAYQRM DRD  
 116619720 GAVMGTVGYMSPEQVLGNSA-DHRSDIFSFGIILNELLTGKRAFQGATSVDTMQAILRQD  
 116622428 GTVMGTVGYMSPEQVRGLEA-DHRSDIFSFVGLHEMLAGTRPFLGETSVETMMAILKQD  
 116620277 GVVVGTVAYMSPEQARGVAL-DIRSDQFSFGLVLYEMITGKRPFVROTAPETMTAILREQ  
 116623521 GMIMGTAGYMPPEQAKGKPV-DRRADIWAFGVVLAEMLSGRQLYCGETISETLAAVLLKD  
 116624929 GSVFGTAAYMAPEQARGNPV-DKRADIWAFGVVLYEMLVKGKRPFOGETVSDTLAAVLTRE  
 116620426 --LMGMTAYMSPEQAIGA AV-DPRCDLWSLGIVLYELLTGRLPFTGENYRAVLHGLLNTE  
 94968763 GQAIGTIAYMSPEQARGIDV-DARSDLFSLGVLIYEMATGVPPFPGATSALIFDAILNRQ  
 71906078 GTAFGSPKYMSP EQVTGQKV-DGRSDIFSLGAVLYEMLAGRAPFDGEELTAVLYQVLHAA  
 32471474 GSVLGTADYMAPEQAGSHSI-TPRTDLYALGSVMYAMLAGRAPPFAGKKVTQVVEALQRDR  
 21220218 GEVVGSP EFLAPERALGRTP-GAASDLWSLGVLLYATVEGVSPFRQGTPLSTLR AIVDEA  
 .\*: :. \*\* \* :. \* :

108759654 YTPLSKVAPNVPAPLVRIIQRAMEV KPEDRFPDAAAMRRELDVF----  
 86156646 FRRVRS LAPGCPARVAAA IERCLARAPER RWKSAGALARHL-----  
 116619364 PVPPVKVDPRLPQSLNDVILMSVAKDASARFOTAGAVRNAL-----  
 108803345 PRPPRELN RGISPQMEAVILRAMAKDPEARYPSATAMLDEI-----  
 120404511 VAPPSTVIDGVPRQFDDLVL CATSRDPADRFADAAEMAEEL-----  
 116619720 P---PLL PETVPVVRQIVQH CLEKEPGNRFQSARDLAF A-----  
 116622428 A---PDLPGSV PETVRTIVEHC LEKEPANRFQSAKDLGFA-----  
 116620277 A---EPLPADVPPPLRWIVERCLAKEPADRYDTTRGLYLELRNLRDH M  
 116623521 PD-LSGLPAGTPGTIRRL LQRCLDKDPRSRLRDI GEARVI-----  
 116624929 PE-WTGIPP---KVERLLRRCMERDPKRRLRDI GDAQFL-----  
 116620426 PEPVSRYRGDVPATVHRILARALTKDRELRYASADLMLSDLR-----  
 94968763 ATRASKVNAATPAGLENI IAKLLEKDPRLRYQSAADLLADL-----  
 71906078 PPLPSSFNPELPRVFDRL IAKSMAKDPDKRYQNATDLAADL-----  
 32471474 PVPLDLINPDIPAEVVEIVHQLLEKDPADRPPTALAVMNRL-----  
 21220218 VP-----PPRRAGALGPVVEGLLRKDP AERLPAEEAERAL-----  
 . : \*

Cluster No. 31 multiple sequence alignment

CLUSTAL 2.0.10 multiple sequence alignment

```
108756948 FEFVRMLERRANGEELLADRYQRHGLAGPVVIKRVSPASSARRHRLVEEVQLAYRLHH
108761165 YAALRTLERRNGEVVLLAERHLPGLAGHVTIKRLRNPASFERCQRLIEEVQLAFRLHH
108757305 YELIRYLGARGSGE-LLLARRHYAGVPGDLVLVKRLQDVGDAQGRARLREEVKLLMRLSH
108761534 FEFVRKLEMRSTGELLMLAQRRYRNGLSGPVVVKRLRNPATFVERRRLVEEVDLTFRLNH
108757303 -----LKAERRVADGVLGAPCLVRRRIATPSTYMMRTRLIEEVQLAFRLNH
                : * .. ::: . ** **.* ** *

108756948 PTIAQVHYFKIHRGK--PYIIMEHVDGPSLETVLDLMMRGPVSLAFALHVAEELADAL
108761165 PAIAQVHHLKIHADR--PHIIAEYVDGPTLDTVISLATMRERPLCAPFALYIAAEIADAL
108757305 PAIVQVFLVRVHEGL--PHLVMEHVDGKSLETLISYAALRRRPFSEAFAAVYVGEVADAL
108761534 PAIAKVMLLKLYRGA--PHVVMYVEGRSLDTVLNLAAMRRRPLSAEFAAHVTAEVADAL
108757303 PNIAQVFMQVDEEADAPFAVMEYVGGPSLETLVTAALVRGKPLSEGFALYVGAEVADAL
* *.:* .:: * . : ** * :*:*: : * :*. ** : : .*:****

108756948 HHAHSLKDAQGRSLGLIHRDVSPRNVRVARTGEVKLTHFGVAYSHLVGREETAELKGD
108761165 HHSHTLRDSENRPGLIIHRDVAPRNIRVARSGEVKVTDFGAAYSLMVGREETPGLLLKGD
108757305 HHAHTLEDARGRPLGIVHRDVSPRSLRLDARGHVKLSDFAMAWAKLPGRIVTETHVVRGD
108761534 SHAHGLTDEWSRPLNIVHRDVSPRNIRVGVHGEVKLTHFTVAASSLSGREVTSQELVKGD
108757303 HYAHTLTSEEGVPLGIVHRDVSRRALALGPHGEVKVLDFGAAYSLMVGREESPENLLRGD
: * * . .*.::*:*:*: * : : *.** : * * : : ** : :*:**

108756948 VAYASPEYLAGKTLTAASDLFSLGLVLELATGRHLFAAAAEALEPPRAKSHE----LRL
108761165 VAYASPEYLLRKPM DGRSDIFSLGLVLMEMLTCKHLFD-LEDAQAP--IAALD----VKT
108757305 LAYASPEALERKPLDGRADLFSGLGVLLLEVLTGLHLLDLEDVERAALAAGPLPDAEVLLA
108761534 IAYASPEALRRRKVDARSDFSLGLVLELLTGRHPLMVDDLA-PVLESEPL----ELHA
108757303 VAYASPEYLRKEGLTPRSDVFSGLGVLLVEVLT SKHLFEVHDVPVASKETRFV-----T
:***** * . : :*:*:*:*:*: * * :

108756948 EEPSSLPLTQMLMLLEDHGPQDVERAAASLPPKVRAVLQGMLHKDATKRFGSAEALCEAL
108761165 EEVPSVPLTQMIALVSRYRSEDVEHAMAGLPDALKAI IHKALQRKPSERYTSAAELRDAL
108757305 EVPSWLPAPLMAARMACLAPAHVERATQGLSPAMRAILGRLLRREPSERFQSQELADAL
108761534 QGPTWMPVKEVAARMAQVGEQVERLAAGVAEPLRCILLRALRQNPSERFQTGAEMAEAL
108757303 ESPPTLPLQMQALMETFTP DVVEKAVAHLS EDLKAVLHTALRLNPEERFATAADM RDAL
: . :* : : . **: :. :*: : * : .. :*: :. : :**

108756948 ----
108761165 ----
108757305 RAV-
108761534 RAWL
108757303 ----
```

Cluster No. 32 multiple sequence alignment

CLUSTAL 2.0.10 multiple sequence alignment

```
126179714      YDRIAFVGRGGLGQVFSAVRRDDRRTVAVKIPAAAYDEATGKTFMKEMRFWEDLAHPNIVT
154151509      YSDIRHIGRGGVAQVFAAHRKSDNLLVAVKIPIISFDEVTGKCFLNEIAAWQTLRHKNIVE
154150293      YPGAELYAEGGVS RVFKARDEKNGRDI AVKVPIRFDEVTGTQFTKELSIWEGLHHENIVE
18977027      YRPLEVLGEGGFAEVYKVVRKNDGKIVAIVKVP-RINQGT SKLFIKEVSIWLHLNHPNIVR
*           :..**...*: .  ..:  :*::*  :: *.. * *: : * * * **

126179714      VHSVNILPVPFVEMEYLP-----RTLDDLEKPLPVETAARIAAGIAAGLAYAHEKG
154151509      VLEVNILPVPYVEMEYVP-----GSLESVEKPLPVWKAVHLVHGIADGLAYATHG
154150293      LYAANIFPLPFIEMEYVH-----RSLAEVFPFIDETRAVGILMGVAEGLRYAHGQG
18977027      LYDADILPIPHLEMEYVEGVKINGKIVRNLDEYKPKMREDIALKIIKGIAEGLKHAHSRG
:  .*:*:*.:****:          .* .  *:  *  :  *: * ** : ** :*

126179714      VIHEDIKPRNILLDDGLTPKITDWGMSTTVAASGDTG-VAGFTLAYAAPEQIAPERFGR
154151509      I IHRDIKPHNIVTSDFVPKITDWGMSKVIATTMDKSNVAGFSLSYAAPEQVSPA EFGRT
154150293      IVHRDIKPGNILLTPDGIPKITDWGLSKAQGTK--QSGIIGFSLEYAAPEQLAPNLFGE
18977027      IYHLDLKLPLNILLTRDLTPKITDWGLAKIAVRTFSGS-ISGYTPLYAAPEQLAPSKYGGV
: * *:* ** ***: .  *****:..  .  .  : **:  *****:* :*

126179714      DARTDIYQLGAVFYELVTGKAPFARESLAGLAEAVIRE--QPAPPSEIDPTLAALDPIIL
154151509      DIRTDIYQLGALFYELVTGSIPFGGDSIVEVGNAIVRD--DPLPPEYNPDAEVVEKIIL
154150293      GPWTDIYQLGVLFYEMLAGHV PFSGAGVGEITHAILHD--APAPVVTGDKNEEINTIIA
18977027      DERTDVWQIGVIFYELLTGKLPFDGYTYEEIRGKIVDEGYNFKPPSTFSPKLAKYNKIFE
.  **::*:*.:****:.* **  :  :: :  *  .  :  * :

126179714      RCLAKDPADRYQSAGEVLEAI
154151509      KCLAKNPADRYQSADELLNAL
154150293      RCLRKRPEDRYASVADLITDL
18977027      KLLAKKKENRYQTIPEFLTDL
: * *  : ** :  :.: :
```



Cluster No. 33 multiple sequence alignment

CLUSTAL 2.0.10 multiple sequence alignment

```
2633949      YQILRVIGGGGMANVYLAEDIILD-REVAIKILRFDYANDNEFIRRFREQAQSASSLDHP
52785557     YEILRAIGGGGMANVYLALDIILD-REVAIKVLRDFVHDADFIRRFREQAQSAASLDHP
118479084    YKLLKMIGGGGMANVYLAHDDILG-RDVAVKILRLDYSNNEEFIKRFHREAQSVTTLSHP
30258509     YKLLKMIGGGGMANVYLAHDDILG-RDVAVKILRLDYSNNEEFIKRFHREAQSVTTLSHP
29897506     YKLLKMIGGGGMANVYLAHDDILG-RDVAVKILRLDYSNNEEFIKRFHREAQSVTTLSHP
30021950     YKLLKMIGGGGMANVYLAHDDILG-RDVAVKILRLDYSNNEEFIKRFHREAQSVTTLSHP
138894697    YKIISLIGGGGMANVYLARDIILE-RDVAVKVLRDLDFANDEQFIKRFREQAQATSLNHE
16411274     YKILHAIGGGGMANVYLAHDIILD-RDVAVKILRIDLADESNIIRRFQREQAQSATSLVHP
16414435     YKILHAIGGGGMANVYLAHDIILD-RDVAVKILRIDLADESNIIRRFQREQAQSATSLVHP
14973227     YRIVKQIGRGGMADVYLAKDLILDGEEVAVKVLRTNYQTDPIAVARFQREARAMADLDHP
15459243     YRIVKQIGRGGMADVYLAKDLILDGEEVAVKVLRTNYQTDPIAVARFQREARAMADLDHP
125718643    YKIIKQIGRGGMADVYLAKDLILDGEEVAVKVLRTNYQTDPIAVARFQREAKAMADLDHP
24376858     YRILQSIGRGGMADVYLANDLILDNEEVAIKVLRRTNYQTDQVAVTRFQREARAMAELNHP
55821411     YRILKSIGRGGMADVYLANDLILDNESVAIKVLRRTNYQTDQVAVARFQREARAMTELSHP
76788494     YRILKSIGRGGMADVYLARDLILDNEEVAIKVLRRTNYQTDQIAVARFQREARAMAELTHP
12724921     YRIIKEIGRGGMANVYQGEDTFLGDRLVAIKVLRNSFNENDDIAIARFQREAFAMAELSHP
29345043     YHIIIGSIGSGGMANVYLAHDLILD-RDVAVKVLRDFQNDQAAIRRFQREALAATELVHP
29377576     YHIIIGSIGSGGMANVYLAHDLILD-RDVAVKVLRDFQNDQAAIRRFQREALAATELVHP
28378319     YRIVRSLGEGGMANVYLAHDLILD-RDVAVKLLRLDLRDPKTIKRFQREALATTELVHP
104774276    YRIVDTLGEggGMANVYLADDIILK-RQVAVKIIRLDLQKDSQVLRARFQREALATSELSHP
116490836    YRIIRPLGEGGMANVYLAVDTKNN-QQVAIKVLRDLQNNPDFVRRFQREQAQAAQLLHP
10175124     YEILETIGGGGMADVYKAMDVILD-RQVAVKVLQAQFSKDEQFIKRFREQAQATSLAHQ
13701020     YKIVDKLGGGGMSTVYLAEDTILN- IKVAIKAIFIPPREKEETLKRFREREVHNSQLSHQ
21282832     YKIVDKLGGGGMSTVYLAEDTILN- IKVAIKAIFIPPREKEETLKRFREREVHNSQLSHQ
27467813     YTITDKLGGGGMSIVYLAVDSILN-RKVAIKAISIPPSEKEETFKRFREREVHNSQLSHE
134299570    YEILEQLGGGGMALVWKGKDTFLN-RLVTIKVLRPEYASDQEFVRRFRREAQAVASLSHP
83589763     YEIVSELGGGGMARVYRGQDRLLN-RNVTIKILREQYASDKFLARFQREQAQAVASLSHP
108802877    YRIVRRLGSGGMADVYLAHDDILD-RDVALKVLSSHYAADAEFVERFKREARSAAALSHP
108803785    YAVLGRGLGGGMAEVFLADRVLG-REVALKVLREAYAADAEFVERFKREARSAAALSHP
118444123    YELLQKIGEGGMAEVYKAKCHLLN-RFVAVKVLKSQYSDDIEFVNKFKQEASSAASLSHN
28210913     YELLEKVGEGGMAEVYKAKCHFLN-RYVAVKILKEEFSQDAQFVEKFKREATAAASISDN
18145401     YELLQCVGEGGMSFVYKARCRLN-RFVAVKILKDEFKNNEEIVRRFKKEATAIANLSNP
15024695     YKIEEEIGVGGTAVVYKAMDTLLN-RHVAVKVLKHEFTEDEEFVFKFKREASAAARIANA
125973093    YELIEKIGGGMADVYKARCKLLN-RFVAIKILKPEFINDEEFLKRFTIEAQAAASLSHP
20807943     YEILEKIGEGMAKVYKAKCHLLN-RIVAIIKILRPEFAADENFVKKFKRESQAAASLSHP
89895431     YEIIKIGSGGMAIVYKAKDLLLL-RIVAIIKILHEQFTADEEFVRRFRREAQSAASLSHA
116626609    YRIISKIGQGGMGTVYRAMDTKLG-REVAIKILPDQFAADSSRMARFSREAKVLAALNHP
116626708    YRIAANKIGEGGMGAVYRAGDTKLN-RDVAIKVLPESFAQDPDRLARFTREAQLLAGLNHP
* :   :* ** . *: .          *::: * : . . : * * : : .
```

```
2633949      NIVSIYDLG-EEDDIYYIVMEYVEGMTLKEYITANG-PLHPKEALNIMEQIVSAIAHAHQ
52785557     NIVSIYDVG-EEDDIYYIVMEYVEGMTLKEYINRTG-PLHPKEAVQIMEQIVSAIAHAHD
118479084    NIVNMYDVG-EEDGIYYLVMYVPGQTLKQYIIERG-MLPIGEALDIMEQILTSAMAHAAH
30258509     NIVNMYDVG-EEDGIYYLVMYVPGQTLKQYIIERG-MLPIGEALDIMEQILTSAMAHAAH
29897506     NIVNMYDVG-EEDGIYYLVMYVPGQTLKQYIIERG-MLPIGEALDIMEQILTSAMAHAAH
30021950     NIVNMYDVG-EEDGIYYLVMYVPGQTLKQYIIERG-MLPIGEALDIMEQILTSAMAHAAH
138894697    HIVSIYDIG-EEGVYYIVMEYVRGATLKQYIQQYA-PLPVEQALRIMDQILTSIAIAHAHE
16411274     NIVSVYDVG-EENDLHYIVMEHVDGMDLKQYIHENH-PISEYKAVDIMLQIVSAVAIAHQ
16414435     NIVSVYDVG-EENDLHYIVMEHVDGMDLKQYIQENH-PISYDKAVDIMLQIVSAVAIAHQ
14973227     HIVRITDIG-EEDGQOYLAMEYVAGLDLKRYIKEHY-PLSNEEAVRIMQILLAMRLAHT
15459243     HIVRITDIG-EEDGQOYLAMEYVAGLDLKRYIKEHY-PLSNEEAVRIMQILLAMRLAHT
125718643    HIVRITDIG-EEDGQOYLAMEYVAGLDLKRYIKENS-PISENEAVRIMQILLAMRLAHT
24376858     NIVAIRDIG-EEDGQOFLAMEYVDGADLKKYIQDHA-PLSNAEVRIMKEVLSAMTLAQ
55821411     NIVAIRDIG-EEDGQOFLVMEYVDGSDLKKFIQDHA-PLSNQDVVRIMGEVLSAMTLAQ
76788494     NIVAIRDIG-EEDGQOFLVMEYVDGFDLKKYIQDNA-PLSNNEVVRIMNEVLSAMSALAQ
```

12724921 NIVGISDVG-EFESQQYIVMEFVDGMTLKQYINQNA-PLANDEAIEIITEILSAMDMAHS  
29345043 NIVSVYDVG-EEDGLQYLVMYVVKGMDLKRYIQTHF-PIPYSTVVDITQQILSAVAMAHE  
29377576 NIVSVYDVG-EEDGLQYLVMYVVKGMDLKRYIQTHF-PIPYSTVVDITQQILSAVAMAHE  
28378319 HIVSLYDIG-EENGMQYLVMYVVKGMDLKRYIKENF-PLPLQOVIDIMEQILSAVATAHA  
104774276 NIVSVFDVG-TDHGLPYVMYVVKGMDLKRYIKEYIREKS-PIPLPQVIKIMDQILSAMELAHK  
116490836 NIVKVLDAF-SFDGVOYLTMVYVVDGMDLKRYISQYY-PVPYAQVNVIMEQVLSAVSMAHN  
10175124 NVVSIYDVG-EEENLYYIVMEYVEGPTLKELIQORG-PLPVDDETIDIMSOMMAAISHAHM  
13701020 NIVSMIDVD-EEDDCYYLVMYIEGPTLSEYIESHG-PLSVDTAINFTNQILDGIKHAHD  
21282832 NIVSMIDVD-EEDDCYYLVMYIEGPTLSEYIESHG-PLSVDTAINFTNQILDGIKHAHD  
27467813 NIVSMIDVD-EEDDCFYIVMEYIEGPTLAEYIHSHG-PLSVETAIQFTEQILSGIKHAHD  
134299570 NIVSIYDVG-QENESHYLVMEYVDGESLKEMIRREA-PLAPFRVIQLGRQIADALEHAHE  
83589763 NVVSIYDVG-QEDDLHYLIMEYVEGRSLKDLISERA-PLPPLEAIDISLQICDALEHAHE  
108802877 NIVSIYDRGEAEDGTYIAMEYLPGGTLKDRILRKG-ALPPKTAATAVAALQIAEALKAHAHQ  
108803785 NIVAIYDHGRAEDGTYIAMEHVPGGTLKERILGGA-PLPPEEAAGIASQVARALEAAHR  
118444123 NIVGIYDIG-SENNINYIVMEYIDGKTLKQIINENG-SLGFNASIDIAIQIAKALECAHN  
28210913 NIVNIYDVG-SEENINYIVMEYVQGETLKDVIKKG-KIPYKEAVKLAIQIAKGLECAHR  
18145401 NVVNVLDVG-TQDDINYIVMEYVEGKTLKDIKEKG-ALPYEVAISIGIKVAKALECAHK  
15024695 NIVNIYDVG-ADGNVNYIVMEYVAGKTLKLIKENG-KIEFNKIIDYATQIAKALNFAHK  
125973093 NIVSIYDVG-QENDIHYIVMEYVNGQTLKEYLDENG-ALYWKDAVNIAIQICQAIHAHK  
20807943 NIVGIYDVG-QEGDIYYIVMEYVKGRTLKELIRENGGPLEVKRAVEIASQVCRALDHAHK  
89895431 NIVSIYDVG-KDGETEYIVMEHIEGQNLKDIIRNYA-PLSTEQTLLEGIQIAEAIRHAHE  
116626609 NIAAIYGVE-----ECALVMELVAGKPLA-----GPLPVDTALDYARQIADALDYAHD  
116626708 NIAAIYGVE-----ERALVLELVEGPTLADRI--AQGPVPLDEALPIARQLAEALEYAHE

::. : . : : \* : \* \* : : : \*\*

2633949 NQIVHRDIKPHNILIDHMGNIKVTDFGIATALSSTTITHTNS-----VLGS  
52785557 NQIVHRDIKPHNILIDHMGHIKVTDFGIAMALSSTTITHTNS-----VLGS  
118479084 FEIVHRDIKPHNILIRADGVIKVTDFGIATATSATTITHTNS-----VLGS  
30258509 FEIVHRDIKPHNILIRADGVIKVTDFGIATATSATTITHTNS-----VLGS  
29897506 FEIVHRDIKPHNILIRADGIIKVTDFGIATATSATTITHTNS-----VLGS  
30021950 FEIVHRDIKPHNILIRADGIIKVTDFGIATATSATTITHTNS-----VLGS  
138894697 NGIIHRDIKQONILLDEDGNVVKVTDFGIAMAMSGTTITQTN-----VLGS  
16411274 HHIHRDLKQONILIDHDGVVKITDFGIAMALSETSIQTNS-----LLGS  
16414435 HHIHRDLKQONILIDHDGVVKITDFGIAMALSETSIQTNS-----LLGS  
14973227 RGIVHRDLKQONILLTPDGTAKVTDFGIAVAFSAETSLTQTN-----MLGS  
15459243 RGIVHRDLKQONILLTPDGTAKVTDFGIAVAFSAETSLTQTN-----MLGS  
125718643 RGIVHRDLKQONVLLTPDGNKVTDFGIAVAFSAETSLTQTN-----MLGS  
24376858 KGIHRDLKQONVLLTKDGTAKVTDFGIAVAFSAETSLTQTN-----MLGS  
55821411 KGIHRDLKQONVLLTKDGRKVTDFGIAVAFSAETSLTQTN-----MLGS  
76788494 KGIVHRDLKQONILLTKKGTVKVTDFGIAVAFSAETSLTQTN-----MLGS  
12724921 HGIHRDLKQONVLLVSSSGTVKVTDFGIAKALSETSLTQTN-----MFGS  
29345043 HRIHRDLKQONILIDEHGTVKITDFGIAIALSETSIQTNT-----MLGS  
29377576 HRIHRDLKQONILIDEHGTVKITDFGIAIALSETSIQTNT-----MLGS  
28378319 HNIHRDLKQONILIDEQNAKITDFGIAVALSEHTMTQTN-----ILGS  
104774276 HNVIHRDLKQONILMDEKGNIKIADFGIAVALNQSAITQTN-----VLGS  
116490836 HGIVHRDLKQONILVGKDGSIKIVDFGIAIARSEFGMTQTN-----VLGS  
10175124 NQIVHRDIKPHNILIGEDGVVKVTDFGIARAMSSATITHTNS-----VMGS  
13701020 MRIVHRDIKQONILIDSNKTLKIFDFGIAKALSETSLTQTN-----VLGT  
21282832 MRIVHRDIKQONILIDSNKTLKIFDFGIAKALSETSLTQTN-----VLGT  
27467813 MRIVHRDIKQONILIDKNKKLQIFDFGIAKALSETSLTQTN-----VLGT  
134299570 NSIIHRDVKPHNILITRSGRAKLTDFGIAQAS-ASTITHTDT-----IVGS  
83589763 NGVIHRDIKPHNILITRNGRVKVTDFGIAQAVSEVTMSQSGT-----MIGS  
108802877 RGVVHRDIKPHNILITESGLKVTDFGIARAASSSTMTRTGA-----VLGT  
108803785 RGIVHRDIKQONILLGASGEAKVADFGIARAASEATISGTS-----VLGT  
118444123 NNIHRDVKPHNILVTRDRNIKVTDFGIAKATSSVTITNSDK-----IGS  
28210913 NNIHRDIKPHNILVTADNLVKVTDFGIAKATNSVTITNTSQ-----IGS  
18145401 SGIHRDVKQONILVTEEGVVKVTDFGIAKSMDSSTIAHTNS-----VMGS  
15024695 NGIVHRDIKPHNIMVTDDEDIKVTDFGIAKASNESTITTTNK-----VVGs  
125973093 NHVVHRDIKPHNILLTKDGMLKVTDFGIARAVSSSTITMAGN-----AIGS  
20807943 NKIIHRDIKQONILVTDEDVVKVTDFGIARAANGATITYTGD-----VIGT  
89895431 HHIHRDIKPHNILVTEDEGRIKVTDFGIARAVSAATMTHTGD-----IVGS  
116626609 KGIVHRDLKPANIMVTPGVVVKVLDGFLAKATA-EDVRTASESFPTVTLDETEPGVVMGT  
116626708 KGIHRDLKPANIKITHEGRVKVLDGFLAKALAPETVAGDPSSSPTMTMRATALGMIMGT

::\*\*\*\* \*\* \* : : : : \*\*\*\* \* : : : \*

2633949 VHYSPEQARGGLATKKSDIYALGIVLFELLTGRIPFDGESAVSIALKHLQAETPSAKR-  
52785557 VHYSPEQARGGLSTKKSDIYSLGIVLFELLTARMPFEGESAVSIALKHLQSETPSVKR-  
118479084 VHYSPEQARGGIANKQSDIYSLGIVMFELLTGRQPFSGESAVAIALKHLQSEIPSPKR-  
30258509 VHYSPEQARGGIANKQSDIYSLGIVMFELLTGRQPFSGESAVAIALKHLQSEIPSPKR-  
29897506 VHYSPEQARGGIANKQSDIYSLGIVMFELLTGRQPFSGESAVAIALKHLQSEIPSPKR-  
30021950 VHYSPEQARGGIANKQSDIYSLGIVMFELLTGRQPFSGESAVAIALKHLQSEIPSPKR-  
138894697 VHYSPEQARGGIATEKSDIYSLGVVMFELVTGRLPFSGESAVSIVLKHLOEETPSPKD-  
16411274 VHYSPEQARGGMATQKSDIYSLGIVLYELLTGKVPFDGESAVSIAIKHLOAEIPISARE-  
16414435 VHYSPEQARGGMATQKSDIYSLGIVLYELLTGKVPFDGESAVSIAIKHLOAEIPISARA-  
14973227 VHYSPEQARGSKATVQSDIYAMGIIFYEMLTGHIPYDGD SAVTIALQHFQKPLPSVIA-  
15459243 VHYSPEQARGSKATVQSDIYAMGIIFYEMLTGHIPYDGD SAVTIALQHFQKPLPSVIA-  
125718643 VHYSPEQARGSKATVQSDIYAMGIIFYEMLTGHIPYDGD SAVTIALQHFQKPLPSIIS-  
24376858 VHYSPEQARGSKATVQSDIYAMGIMLFEMLTGHIPYDGD SAVTIALQHFQKPLPSIIA-  
55821411 VHYSPEQARGSKATIQSDIYAMGIMLFEMLTGHIPYDGD SAVTIALQHFQKPLPSILA-  
76788494 VHYSPEQARGSKATVQSDIYAMGIMLFEMLTGHIPYDGD SAVTIALQHFQKPLPSILA-  
12724921 VHYSPEQARGSNATVQSDIYAIGIILFELLTGQIPFDGD SAVAIALKHFQESIPSIIN-  
29345043 VHYSPEQARGSMATNQSDIYAVGIILYEMLTGNVPFDGESAVTIALKHFQEEIPSVKM-  
29377576 VHYSPEQARGSMATNQSDIYAVGIILYEMLTGNVPFDGESAVTIALKHFQEEIPSVKM-  
28378319 VHYSPEQARGSMATKQSDIYSLGIILYEMLTGSVFPKGETAVSIALKHFQONAMP SVRE-  
104774276 VHYMSPEQTRGGMVTQSDIYSLGIILYEAL TGHPFNGETPVAIALKHAEDDIPSLRK-  
116490836 VHYSPEQTRGGMATNKSDIYALGIVILFEMLTGQVPYKGETVVS IAMKHSSEQMPSAKD-  
10175124 VHYSPEQARGGLVTFKSDIYSLGIVLFEMVTGQLPFGDTAVSIALKHLQNDIPSPKE-  
13701020 VQYFSPEQAKGEATDECTDIYSIGIVLYEMLVGEPPFNGETAVSIAIKHIQDSVPNVTTD  
21282832 VQYFSPEQAKGEATDECTDIYSIGIVLYEMLVGEPPFNGETAVSIAIKHIQDSVPNVTTD  
27467813 VQYLSPEQAKGEATDESTDIYSIGIVLYEMLVGEPPFNGETAVSIAIKHIQDSIPNITTD  
134299570 VHYISPEQAKGEPAGPKSDIYALGVVLYEMLTGQVPYQADGAIGVALKHIQEEPLSLRE-  
83589763 VHYLAPEQARGGVIGATADIYSLGIVLYEMLTGDLPFHGETPVAVALKHLQENPRPVRE-  
108802877 AHYISPEQAMGEPVGPSSDLYSLGVVLYEMLTGQLPYDADTP IGIAMKHVNGHLRPPRE-  
108803785 VGYSPEQAMGRRAGPRSDLYSLGAVLYEMLVGNLPEADTPVAVAVRHIHEPPRHPRRA-  
118444123 AHYISPEQAKGRFVDCCTDIYSLGIILYEMVTGKVPYDGESPVSVALKHVQEELIPPIK-  
28210913 VHYFSPEQAKGGFIDFRTDIYSLGIVLYEMVTGQLPYNGETAVSIALKHIQGFIPPKT-  
18145401 AHYFSPEQAKGTYTDRYTDLYSLGIVLYEMVTGVVFPNGDSPVTVAVKHIQEKAI PPKN-  
15024695 AHYLSPEQAQGIPVDCRTDIYSFGIVLYEMATGKVPYDADTPVSIALKHIQDAAVPPNE-  
125973093 VHYFSPEQARGGFTDEKSDLYSLGIVLYELLTGRVFPFDGESPVAVAIKHIQDEPEEPIN-  
20807943 AYYFSPEQAKGSIVDERTDIYSLGIVLFEMLTGKVPFEGDSPISVALKHIQEDILPPSR-  
89895431 VHYSPEQARGIQTNEQSDLYSLGIILYELLTGKVPYDGETPISIALKHLQELAVPPSK-  
116626609 ARYMAPEQARGKPVDRADIWAFGVVLYEILTGKHLFQGD TASDTIVAVLTLEPN-----  
116626708 AGYMSPEQARGKRVDRADIWAFGVVLYEILTGKHLFQGD TASDTIVAVLTLEPN-----  
. \*::\*\*\*: \* :\*:::.\* ::\* .. : ::

2633949 WNPSVPQSVENIILKATAKDPFHRYETAEDMEADI-  
52785557 WNPAVPQSIENVVLKAMAKDPFHRYEAAEEMENDL-  
118479084 WNENIPQSVENIILKATAKDPFHRYQSANAMKRDI-  
30258509 WNENIPQSVENIILKATAKDPFHRYQSANAMKRDI-  
29897506 WNENIPQSVENIILKATAKDPFHRYQSANAMKRDI-  
30021950 WNENIPQSVENIILKATAKDPFHRYQSANAMKRDI-  
138894697 WNPEIPQSVENIILKAMAKDPFYRYPSAQEMNEDI-  
16411274 QNPEIPQSLENIIIKATAKDPFLRYQNAEEME KDL-  
16414435 QNPEIPQSLENIIIKATAKDPFLRYQNAEEME KDL-  
14973227 ENPSVQALENVI IKATAKKL TNRYRSVSEMYV---  
15459243 ENSSVQALENVI IKATAKKL TNRYRSVSEMYV---  
125718643 ENPNVPQALENVVIKATAKKLTDRYQSVAEMYVDL-  
24376858 ENKNVPQALENVVIKATAKRLTDRYHSTQEMLODL-  
55821411 ENRNVPQALENVVIRATAKKL TNRYNSTLEMSRDL-  
76788494 ENKSVPQALENIVIKATAKKLTDRYKTTYEMGRDL-  
12724921 LNPEVPQALENVVIKATAKDIKNRYTDVEEMMTDV-  
29345043 FDPGIPQSLENVVRHATAKDPSTRYKTANEMAEDL-  
29377576 FDPGIPQSLENVVRHATAKDPSTRYKTANEMAEDL-  
28378319 FDADIPQALENVVLQATTKDPRERYATVEDMAADLL  
104774276 QNKAIPOALENVVLKATAKDPDRYASVAEMKADL-  
116490836 IDPNIPQALENVILRATAKNPDNRYLTAEDMANDL-  
10175124 IQPSLPQSIENVIVKATAKDPFYRYGVSSEMEDL-  
13701020 VRKDIPOQSLSNVILRATEKDKANRYKTIQEMKDDL-

21282832 VRKDIPQSLSNVILRATEKDKANRYKTIQEMKDDL-  
27467813 KRDDVPQSLSNVVLRATEKDKYHRYHTVQEMCDDL-  
134299570 INPNVPEDLEKVVLRAMDKRQDRRHKSALGEDLV  
83589763 LNPVPPALERVVMRTLEKDPARRYPSAAALRSDDL  
108802877 VNPAVPEGLDAITVRLAKDPKERYQSADELMEDL-  
108803785 ANPAVQALDAVTVRLAKRPEDRYPDAATLAEDL-  
118444123 VNPNIPELNLKILKAVEKEPYKRYQSAHDMI----  
28210913 INPSLSESLNSIILKMEKEPVKRYQNVGELINDL-  
18145401 INQNIPNSLNDLIMKAMEKDPVNRYPQTAKETIIGDL-  
15024695 LNKDIPIALNKMILRCIEKKPENRYQNANEILDEL-  
125973093 IKEDIPTGVNSIVMRAIQKDQALRYQSASELLNDL-  
20807943 LNEKVPEELDKIVLKATQKDPNLRYQTASEFLKDL-  
89895431 LNARVSPALENLVMRSIAKSPDQRYATAKDLLQDL-  
116626609 -WDAVPPRVQGLLRCLERDPRKRLRDIGDVGLL--  
116626708 -LDAAPENLRPLLRRCLERDERKRLRDIGDAF----

. : : : : \*

Cluster No. 34 multiple sequence alignment

CLUSTAL 2.0.10 multiple sequence alignment

```

21220714      YRLERLLGEGGMGRVYLGRTAG-----SAVAVKVVHRAYAADPEFRRRFALEVAAAARR
21222767      YRLAARLGAGGMGRVYLSHTRGG-----RPVAIKVVRSELADDATFRRRFGREITAARR
21221774      YRLESRLGSGGMGVVHLARSTSG-----MRVAVKVVHATYARDPEFRGRFRQEVAAAARR
29831260      YLLEAALGSGGMGVVHLARSASG-----LRLAVKVVHAQYAQDPEFRGRFRQEVAAAARR
29830359      FEVLGRLGAGGMGLVYLARSASG-----RRVAIKTVRTELAEDQLFRVRFTRREVEAARA
21222037      YRLLGRLGTGGMGHVYLARSDRG-----RTVAVKLVREELAALAEFRFRFRHEVESARR
29831097      YRLLARLGAGGMQVYLARSDRG-----RTVAVKLVROQLAEQDEFRRFRFRQEVQAARR
134098455     YRLLARLGRGAMGAVYLARSRG-----RVVAVKLVRPDLADDTEFRFRFRREVQMARS
21222873      YRLLGRLGAGGMGRVFLGRSPGG-----RLVAVKVVHAELLRRPEFRDRFRREVQAARM
54024334      YRLLGVLGAGGMGRVYLGRSAGG-----RTVAVKVIRPDLVADPEFRTRFRQEVAAAARR
86741561      YRLANRIGAGGMGVYLGFGTDG-----RPAAVKVPSAGLADDPEFRSRFRHEVDAARR
86741562      FTIHNRIAGAGGMGTVYLGFNADG-----RAAAVKVPDARFADDPEFRFRFRREVAAAARR
86739363      YRLQNRIGAGGMGTVYLGFPDR-----RPVAVKVAEDLAEDDEEFRSRFREREVRAALR
86739076      YRLHNRIAGAGGMGVYLGFPDD-----QPVAVKVPHEVHASDPEFRFRFRSEVSAARR
86739440      FTLLGRLGEGGMGTVFLGRGRPDVAEHAGRLVAVKVIRPDLARVPEFRFRFRREADIARR
86741688      YQVIGRLGQGGMTVFLGR-APD-----GSAVAIKMIRPELAQRPEFRFRFRAREAESARR
86739244      YQVVGRLGAGGMGTVFLAQDAE-----KFVAIKVIRSDLAADPEFRFRFRDEVAAAARR
86740152      FTTLARLGSGGMGVYLGIDDETG-----GPVALKVIRSDFTADPEFRSRFRREVAAAARA
86741129      HRVLGRLGAGGMGVVYLAEGPLG-----QVAVKLVIRPEYADDPQFRARFRHREVQACFR
29833341      FRLHRLGAGGMGVYLGSDRRG-----QRVALKVIRPDLAEDQEFRRFRFRAREVSAARR
29830627      YTLLARLGAGGMQVYLGSRPAG-----RLVAIKVIRDEITDHPEALARFRREVETAGA
119717589     YTLLARLGEGGMGVVHLARREAG-----ERVALKVLRPHIVGDEEARRRLAREVGSLSR
      . :      :* *.** *.*.                *:*                *: *
    
```

```

21220714      VQGLYTPVVVA-ADLDADEPWLATAYAPGPSLQOAV-GERGPLPAAEVLALTAGVAEALQ
21222767      VKGAYTAELID-ADPDGTPPWLATLYVPGPSLAGAV-ARSGPLPVPVAVLWLMAGVAEALQ
21221774      VSGAFTAPVVD-ADPEAGRPPWMLTLFIPGPTLSEQV-KRNGPMDEPQLRRRLMAGLAEALR
29831260      VSGAFTAPVVD-ADPGAGRPWMLTLFIPGPTLAEHV-KRNGALPPARLRHLMAGLAEALR
29830359      VSGFYTATVVD-ADPRAAVPWLATAYVPAPSLEEIV-TECGPLPAQAVRWLAAGVAEALQ
21222037      VGGHWTAPVLD-ADTEAAVPWVATGYVAGPSLQOVVGHGHDGALPERSVRTLGAGLAHALQ
29831097      VGGHWTAPVLD-ADTEAAIPWVATGYVAGPTLQTVVGSDHGALPERSVRILAAGLAHALQ
134098455     VGGFWTATVVD-ADTEAEQPWLATEYVPGPTLHQAV-ADHGALPEHTVRS LAAGLAEALA
21222873      VSGAFTAPVVD-ADPDAPLPWLVTYSIAGPSLEQAV-AERGFDPQAVLTLAAGLAEALV
54024334      VGSSCTAPVLD-ADVAANPPWLATGYVAGLALS DAV-ERFGPLGEHSLLVLAHGLAEALI
86741561      VRGSAVAAVLD-ADLTGQRPWMATEYVEGRNLADAV-ATRGQLDDRLVQGLAVGLADALV
86741562      VHGRAVAAVLD-ADPEATSPWLATEYVEGTSLADAV-LRHGRLEERLLHGFVSVGLADALI
86739363      VRGTAVAAVLD-ADTEAAAPWVTEYVEGTSLAEAV-RARGRLEDHLVRGLAVGLADALV
86739076      VRADTVARVIR-AEVDGPKPWVATEYVAGPTLRAAV-QEGGPLTGRPLDGLAIGLAAALE
86739440      VARFCTAEVLGVVDPDPGRPYLVTEYIDGLTLAQTV-AADGPLRSADLERVAVSVAAALT
86741688      VRRFTTAAVLD-ADPYGPPYLVTEFVEGPTLSRRV-SVRGPLRPADLEQLAVSVTTALS
86739244      VAPFCTAQVLD-ADPDARRPYLVTEYIDGVRLDQAV-TESGPLPLSTLQGVAVGVASALT
86740152      VDGACTARLVD-ADPDAEDPWMATEHIHGQSLAEAI-ADRGALAMPVVMALATGLAEALK
86741129      VGGHAHTARLVD-FELEAERPWLATEFVDAPDLAAQV-AAAGPLSTGEQIILAAGLAEALA
29833341      IRGGCTARLVA-ADLDADRPWFATQYVPGPSLHDKV-AEAGPLSAADVAAVGAALSEGLV
29830627      VRSAYTANLID-ASLDAAPYWLATEYVSGPTLGGAV-TERGPFPPDSARRLFAALAEALA
119717589     VRSQWVAEIVD-ADPWAEPVYVATRYVPGLSLHDHV-VEEGAITGADLLWLASCLAEGIA
      :      .. ::      .      :..* .      * :      * :      .      :: :
    
```

```

21220714      TIHAAGVIHRDLKPSNIVLTADGPKVIDFGIARAAD---VTALTATGMRACT---PAYM-
21222767      AIHAAGIVHRDLKPANVLLAADGPRVIDFGISLAAD---STAHTATGTTIGT---POYM-
21221774      DIHRVGVVHRDLKPSNIVLLAEDGPKVIDFGISRPKD---SELRTETGKLIGT---PPYM-
29831260      DIHRAGVVHRDLKPSNIVLLAEDGPKVIDFGISRPSD---SELRTETGKLIGT---PPFM-
    
```

29830359 SIHGAGLVHRDLKPSNVLVVEDGPRVIDFGIASGVS---NTRLTMTNVAVGT---PAYM-  
21222037 DIHAAGIVHRDLKPSNVLVITIDGPRVIDFGIARALQTVADGGLTRTGALVGS---PGFM-  
29831097 DIHAAGLIHRDLKPSNVLVITIDGPRVIDFGIARALETVTDVRAQSHRKPARRSSVRTGFHG  
134098455 AIHRADLVHRDLKPANVLLGPDGPRVIDFGISRMT---GNALTATGMFLGT---PGFF-  
21222873 SIHAAHLVHRDLKPSNVLLAEDGPRVIDFGIVRSVD---ADSLTGSGHMAGS---PGFM-  
54024334 AVHAAGVVHRDLKPSNVLLALDGPVIDFGIARAMD---DTSLTTTGVIGS---PAFM-  
86741561 AIHAAGVVHRDLKPANILLTWDGPKVIDFGIARAGD-NTS--HTRTGMLIGT---LVWM-  
86741562 AIHAAGVVHRDLKPSNILLAWDGPVIDFGIARASG-IPS--HTRTGILIGT---LAWM-  
86739363 AIHAAGVVHRDLKPSNILLAWDGPVIDFGIAHLTD-SAT--LTRTGHVIGT---LAWM-  
86739076 AIHAASVVHRDLKPANIVMSWAGPKVIDFGIVARSAD-YTG--YTQAGELVGT---VVWM-  
86739440 AIHGAGLVHRDLKPSNVLLSALGPRVIDFGIARALD-APTMLSQEIQR-IGT---PAFM-  
86741688 AIHAAGIVHRDLTPGNVLLSPVGPKVIDFGLAREFN-ADTDLSHNVRHAIQT---PGYM-  
86739244 AIHRAGIVHRDLKPSNVMLSYSGPRVIDFGIARTLD-MTKGRTQ-TGLVLGS---VGWM-  
86740152 SIHDAGIVHRDLKPGNVILSEDGPKVIDFGIAAAVD-ATA--ATRTGVLLGS---PGYM-  
86741129 SIHAAAGLIHRDLKPSNVLWTADGPKVIDFGIAAAAE-ARP--LTAVGGVVGT---PGWL-  
29833341 AVHEAGVVHRDLKPSNILLSPKGPRIIDFGIAWATG---ASTLTHVGTAVGS---PGFL-  
29830627 SVHGYGVTHRDLKPNVILSGQGPLLIDFGIARNTT---DTALTQTGLAPGT---PGFT-  
119717589 SVHAVGVLRDVKPSNVLMGRTPILIDFGLARVAD---DPKLTHTGWLLGT---PGYL-  
:\* : \*\*:\* \*:: \* :\*\*\*\*: :

21220714 APEYIR-GQEVTEAGDVFALGLVAHFAATGRLAFGGGSD--HGVAIRILEASP--DLGDC  
21222767 APEQAS-AGAITAATDVFLGQTAFAALGKPLYGDGPA--ATVLYRIVHSEP--DLSEL  
21221774 APEQFRRPREVGPAAADVFTLGLSMVHAATGRGPFDSDSP--YVVAYQVVHDEP--DLTGV  
29831260 APEQFRRPREVGPAAADVFLGSLVIVAATGSGPFDSDSP--YLVAYQVVHDEP--DLTGV  
29830359 SPEQAKDSRSVTGASDVFSLGSMVFAATGHAPFHGANP--VETVFMILLREGP--DLEGL  
21222037 APEQVR-GDRVTPACDVFCLGSVLAAYAATGKLPFGSANSGAHALMFRIAQEEP--DLEGV  
29831097 HPEQVR-GDRVTPACDVFCLGSVLAAYAATGALPFGTASSGVHALMFRIAQEEP--DLTGV  
134098455 SPEQTV-GNEVGPPSDVFLGAVLVFAATGMGPFQNT--AAMLYRVVHTEP--DLDEV  
21222873 SPEQVN-GDEVTWASDVFCLGAVLFAAATGTNPFQAGPT--PALLYRVVHNA--DVAAV  
54024334 SPEQVT-GEPIGPAGDMFALGGVLAAYAAAGQPFQGTGDT--VQLLRVVYEEP--RIEAV  
86741561 APEQLRGE-RAGPAADIFAWGACVTFAAAGRPPFRGERA--EAIGLQILTAEP--NLDGL  
86741562 APEQLRGE-RAGPPADVFAWGACVTYAATGHPPFAEQS--DVLTRMREDRPP--DIAGV  
86739363 SPEQMRGE-PSDASADVFAWASCVTYAATGRHPFHAETP--DLLAVRVQRDSP--DLYAL  
86739076 APEQINGQ-QAGSAADVFAWGCVVFAATGRRPFRGEAP--EIVALHISSTEP--ELDGV  
86739440 APEQANGE-PVTAADVFAWGGLVTYAGTGSFPFGDGPT--PVQLYRVVHREP--LLDGL  
86741688 SPEQILDA-PITSAVDIFAWGAVIIFAATGHAPFGTGRI--DAILYRIVNEPP--RLDGV  
86739244 APEQMEGA-ALGPAVDVFAWGLLIGYAATGGHPYGHGTY--LEMSEKILTGQP--DLRAM  
86740152 SPEQVTGRGEIGPPADVFAWGLTVLFAASGRPPFGAGRP--DALLYRVVHDEA--DTGDV  
86741129 APEQATGG-EVTAASDVFAWGALVCFEAATGQPPFGSGSA--DAVASRIAAEFQIDFDRL  
29833341 APEQVR-GAAVTPATDVFLGATLAYAATADSPFGHGSS--EVMLYRVVHEEA--HLNGV  
29830627 APEVLTHN-QVTSADVFAWGALIANAATGRPPFGSGPA--HAVSYRAVHEDI--DVDGV  
119717589 APEILY-GEDATVASDVHSWAATVAYAGTGHPPFGRGPS--MAIMDRVRRGQF--DLDGL  
\*\* . \*:. . \* . . :

21220714 P-ESVRGVVALCLEKDPARRPTPAEIVRL-  
21222767 P-ERLRDLLGRCLATAPEERATPAEIVEW-  
21221774 P-DSLAPLVLRCLAKEPEDRPTPDELMREL  
29831260 P-EELAELVAGCLAKEPDDRPTPDELMTAL  
29830359 P-DELRPLIESCMQMEATGRPNPADLQAQL  
21222037 P-EGIADLVDRCLRKDPAARPALADVLER-  
29831097 P-EGLADLVRECLRKDPAARPLERILER-  
134098455 P-DGLRPLLASCLAKDPAQRPTPAQLLDGV  
21222873 ADPALRSLIADCLAKDPAHRPAPREILARI  
54024334 P-PRLRPAAVACLAKNPADRPTPRQVLDQL  
86741561 P-ASLVGVVRAALDKEPARRPAATELLARL  
86741562 P-VKLAPLVRAALGRRPEERPSAAELVRS  
86739363 P-GYLLNQVARALSKAPRERPDAAALLAAL  
86739076 P-ERLLGPVRQALTKNPGHRPSAGELVRL  
86739440 A-PALRPIVEEAMRKDPATRPSAQELFLRL  
86741688 G-GELRNLVEIAMAKDPAARPSAEELRTAL  
86739244 P-PDLTPIVRSALARDPRDRPSTENLLTL  
86740152 P-PALRPAVRAALLKEPMARPSAHALLRVL  
86741129 A-PELHAPVREALDRQPPQRPTALDLCERL  
29833341 P-DALAPLVRACLAKDPEERPSTLQSLRL

29830627 D-PELAALIQACVAKDPVERPGLTV----  
119717589 P-HDLHQVVAAALDPDRERPSLEQILAWL  
: : .: . \*. :

Cluster No. 35 multiple sequence alignment

CLUSTAL 2.0.10 multiple sequence alignment

21221541 -----MGQVWTAYDRRLDRRVAVKLLRPDKVAGAEADELRRRFVRECRITAQV  
29830083 -----MGQVWTAYDKRLDRRVAVKLLRPDKVAGQEADELRRRFVRECRVTAQV  
134103045 YELDELPLGKGGMGAVHRGHDLDLDRRVAVKFLH--LPGG-PDEELEQRFIREARILARL  
86741364 YELEAVPLAKGGMGGEVWGRDVKLDREIIVKVFVR--FPDGQPDQELIRRFIRESRITARL  
117928194 YLIEDR-IARGGMATVYRARDMRLDRPVAVKVMH---DVFATDPEFVARFIREAKAAAAAF  
\* . \* . \* :\*\*\* :\*\*\*.:: \*: \*\*:\*\*\*. : \* .

21221541 DHPGLVTVHDAGSEGEELFLVMQYVDGADLSDHLAEHDPYPWQWAVAVAAQLCAVLSAVH  
29830083 DHPGLVTVHDAGSEGEELFLVMQYVDGADLADHLAEHTPYPWQWVAVAAQLCAVLSAVH  
134103045 EHAGAPPLYDFGAYDHRLFQVMQFVDGVTVADLISEHGPPVPVWAAAVAAQACAVLSAAH  
86741364 LHPGVPAVYDAGTHEERPVLVQRVHGLSVADLVAEQALPVGWAAAIAAQVASVLAVAH  
117928194 SHPNVVAVFDQADGGHVYLVMEYVVGETLRDLLRRRGRGLSPAEALGILQPVLAALSAAH  
\*.. :\*. \* \* : . : \*\*: \* \* : \* : . : . . : :\*.\*\*\*

21221541 AVPIVHRDLKPRNVMVKQDGTVTVLDLGVASVMD-ADTTRLTHTGTPIGSPAYMAPEQAM  
29830083 AVPIVHRDLKPRNVMVKQDGTVTVLDLGVASVMD-TDTTRLTHTGSPIGSPAYMAPEQAM  
134103045 ALSICHRDLKPTNLMLCPDGAVKVLDVFLAVLRD-TDVAQFTRAGQILGTPAYMAPEQIQ  
86741364 RASLVHRDLKPANLMLEPDGTVKVLDFGLAVALDRNTLSKITVTGQHLGSPAYMAPEQVL  
117928194 ASGLIHRDVKPENVLLARDGRVKVADFLAQAVN---RTASRTATLIGTVAYLAPEQVT  
: \*\*\*:\*\* \*::: \*\* \*. \* \* :\*\*\* : : . :\*: \*\*:\*\*\*\*

21221541 GGAVGPYTDLYALGVLLHELLSGDVPFAGSTALGVLHRHLYEPPLPVRRIPEVPEALEA  
29830083 GGAVGPYTDLYALGVLIHELLSGDVPFTGSTALGVLHRHLYEPPLPVRRLRPEVPEALEA  
134103045 QGVAGPRSDLYALGCVLHEMLTGRQLFTGPTAYAVFEKQVKQAPPPVHG---VPAELDD  
86741364 AGLSTPATDIYALGATLFEMLTGQRLFAGASSYTMNKQVEEVPARVRSRSLRADVPRGLDE  
117928194 RGVADARSDVYAAGIMLFEMLTGAPPYQGDSP LAVAYRHAHEDVPPSPSRVQSLPPAIDA  
\* . :\*:\*\*\* \* :.\*\*\*: \* : \* .. \* :: : :\* ::

21221541 LVLRLAKDPQHRPDSAQEVYEHL  
29830083 LVLRLAKDPQHRPASAQETYEQL  
134103045 LVQDLLKKDPEDRPADAGVLYERL  
86741364 LVAAMLSKAPEDRPCGVEKV----  
117928194 VVLAATARDPDRRPADAHALLALV  
:\* : \* : \*\* ..

Cluster No. 36 multiple sequence alignment

CLUSTAL 2.0.10 multiple sequence alignment

```
32471012      YTLREQIGEGGFGLVFVAEQES-PVRRRVALKIVKPGVGSKEVIARFEAERQAVALMNHP
32477437      YQLMERIGEGGFVWFVAQORS-PVQORRAALKI IKPGMESREVIARFEAERQAIALMDHP
32476285      YSICELIGEGMGSVFVAQQEQ-PVRRKVALKIIRAEIATKEALARFSAERQALAMMDHP
94969337      YRLIDLLGEGGMGEVWMAEQVE-PLRRTVALKLIKAGMDTKAVVARFESERQALALMDHP
116620331     YRIVQLIAEGGMGAVYQAVRVDLIRKVVAVKVIIRRGVFGFALRRFDIERQILAHLDHP
116620490     YQMVREIGHGGMGTVYLAERADGEYRMOVAIKLVSPHLCTEAVLRRFRTERQVEASLDHP
* :      :..**:* * : * : . : .**:: : . .: ** *** * ::**

32471012      NIAQVFDAGVTADYRPFVMEVLRGLPITEFCDEKQMDVRERLNLMDVCSAVHHAHQKG
32477437      NIARVFDAGVTETAQPFVMEVLRGVPLTDFCNSNRLRISDRLOLFVTICHAVQHAAHQKG
32476285      CIAKVLDDGGATESGQPYLVMEVLRVQGPITEYASHSGLSIEQRLRLFQKVCHAVQHAAHRKG
94969337      NIARVFDAGSTPEGRPFVMEYVPGQPITAYCDRQKLALKQRLLEFIQVCEGVQHAAHQKA
116620331     NIAKLLDGGATPDGRPFVMDFIAGTPIDEYCDHHKLGIRERLDFFLKVC SAVHYAHQNL
116620490     NITRLLDGGTTDDGLPYLVMEYVDGVRIDAWCD SRKLSVRDRLKLFQVCAAVQSAHEKE
*:::*. * *      *::*: : * : :.. : : **: : * .*: **.:

32471012      VIHRDIKPSNVMVTLHDDRAVAKVIDFGVAKALD-QKLTDKTVYTRFFSMIGTPLYMSPE
32477437      I IHRDLKPSNILVTLQDGRPLAKVIDFGVAKAIG-QSLTVKTIYTRFTSMVGTPAYMSPE
32476285      VIHRDLKPSNILVAEIDGALPKVIDFGLAKALD-QPLTDITIHTGFAQLMGTPMYMSPE
94969337      I IHRDLKPSNVLVQVEIDKRPVKI IDFGLAKATG-QRLTEATMYTEVGARVGTPAYMSPE
116620331     VIHRDLKPGNILVTEEG---ALKLLDFGI AKLLDPDALAGEDEPTLTTVHAMTPEYASPE
116620490     IVHRDIKPGNILVTADG---TIKLLDFGISKVLN-RELFDTPETTLG-ETPMTPEYASPE
:***:**.*:.*      .      *::**::* . * *      * * * **

32471012      QAEMSSLDVDTRSDIYSLGVLMYELLVGATPFDRGR LDSAGLDEMRI IREEEPPRPSTR
32477437      QAAMSTDDVDTRSDIYSLGVLLYELLTGSTPFAPDRLOTAGFDELRI IREEEPPRPSTR
32476285      QAEMGTIDIDTRSDVYSLGVLLYELMVGAPPFDRETFKTASFDEVRI IREIQPPRPSVV
94969337      QADANERNIDTRTDVYSLGVILYELLTGVLPFEP---QDTTAD EMLRKIRDEEAPRPSTK
116620331     QLHG--LQVTTASDVYSLGVLLYRLMTGHRPYAGDS---RSIEELWEHIRSRPPRRPSTV
116620490     QIRG--LRVGPATDIYSLGVVLYQLLTGSLPFASQ---REQRQVMRAICEEEPLKPSAA
*      : . :**::**::* * * *      * : : . * . . :**

32471012      LSTLT----AERIRSLGLQNHGAGASQSRSLSSDLRGLDWIVMKALEKDRTRRYDSAAS
32477437      LSTLN----SEESRTSDVERLGP----PTTPSTAMKRDLDWIVMKALHKDRNRRYSTAGA
32476285      SRTLS----ANENVN---HQQGD---VQRKLHPSIRGELDWLIMKTMEKDRRRRYGSASE
94969337      LRSST----QNAVKVAEQRQEQP-----QTLIRHLRGELDWIVMKALEKDRGRRYGTPTE
116620331     IAAN-----DDGVTPETVCSARS--TKPERLQRLSGDLDNILMMALRKEPERRYCSVEQ
116620490     IHQETVLAGQQGMVAETTSQARG--ESPTGLRRLLSGDLDNIVLKALRKEPERRYPTVRA
:      :      : ** : : : .*: ** :

32471012      LANDI----
32477437      LAEDILRFL
32476285      LADDI----
94969337      LAADV----
116620331     FANDLRRHL
116620490     LSEDL----
: : *
```



Cluster No. 37 multiple sequence alignment

CLUSTAL 2.0.10 multiple sequence alignment

```

37521672      YRLCRHLG--VNGGRETWLAADGLCAEVSVTLKTLYFG-RSATWQDHERLEREARTLASL
37521696      YRLVERLG--HNVHRQTWLAGDERTAEQ-VVLKALAFD-NEMQWQQLKLAEREAATLQSL
37519991      YLLERQLG--STGARQTWLVQNSATGQA-LTLKALYFG-TGMDWRNLALFEREAQTLKSL
113475351     YQLQKQLGR-AVAGRKTWLAFDSDLQEEQ-VIIKMLAYS-PEILGQELDLFETEAKILKAL
17133011     YEIQQLLG--KKAGRRTLLAKDVVTGEL-VIVKLLVFS-SDFEWDDLKLFEREAETLKSL
22298642     YELLRELG--SHPGRRTYLALDRWHYEQ-VVLKLLLFVGGITWDDFKLFEVAVLQTL
17131853     YQVIQELGRNQEEGRITYLAHHHQSKQQ-VVIKEFSFAHTYTDWCDFAYESEAKILQKL
* : . **      * * * . . : : * : : : * * . * *

37521672      DYPGIPRHRDAFWVELPEGH---YCLAQEIYIAGITLAERVGSGGRLGEADVRLAANLL
37521696      THPCIPRLVESFWLELPEGH---YFCLVQSYIPGQSLAAMLRAGRRWSPGEVNLARQVL
37519991      DHPRIIPRYHEFFQWQPEGD---YFCLVQDYIPGVSLAEQVHSGKRWSEAQIEQAALAIL
113475351     NHPHIPRYRDYFSLKEANLDPWFALVQNYIPGFSLQELDRDKIFTEEDVEKIAKEML
17133011     SHPHIPRYLDYFEVNPPTIKG---FALVQSYISAQTLQYLSQSGRSFSESDIKQIATAIL
22298642     DHPAIPRYLDYFEINTPDLKG---FALVQTYIEAKSLALWQAEGRVFSEGDLRLLADRLL
17131853     NHPRIIPRYLDSFATQT-----GFYLVQYKHALPLS----SKRSFQPEEIKQIAVSVL
* * * * : * : : * * * . . * : : * *

37521672      ETLAYLHSQAPPVIHRDIKPSNIVCTAD-----GGYALIDFGSVQAQSS--TATLTVAGT
37521696      EILDYLHSQSPVVRDIKPSNIILSDD-----GRLFLIDFGAVQAQSLP-DQTVTVVGT
37519991      EILDYLHSLAPPVVRDIKPSNIVCTAD-----GRLYLVDVDFGAVQAQVLS--GRTVTVVGT
113475351     EILYIYHLKPSVLRDIKPSNIVCTAD-----QKIYLVDFGAVQSQGNAQGVFTFTIIGT
17133011     EILYIYHLGLYPPVIHRDIKPSNILLGERSGNNVGVYLVDFGAVQVTAI--AGSTRVTVVGT
22298642     DILYIYHLSRQPPVIHRDIKPTNILLGDRSGHDLGKVYLVDFGAVQTAI--AGSTRVTVVGT
17131853     EILVYLRQIDPIIHRDIKPENILVDEQ-----LNAYLVDFGLARVQDTKIALTSLLTGT
: * * * : . : * * * * * * * * * * * * * * * * * * * * * *

37521672      FSYMPPEQFIGRAAP-GSDLYALGATLLFALTGTDPADFP----RRGLHLIFQSRVGVGR
37521696      FGYMAPEQFYGKTSP-ASDLYSLGMLLLCILTGTGTEATEIP----RRGLQVELPSTSLVEQ
37519991      YGYMAPEQFGGRAVP-GSDLYSLGATLVHLATGMNPADLV----DGGFHRIPEQLPLSP
113475351     SGYAPLEQFWGRAVP-ASDLYALGATLIHLLTGISPVDLP----QKNYHIQFPENVNINP
17133011     YGYMPPEQFGGRTVT-ASDLYSLGATLIYLVGTGTHPADLP----QKDFRIQFESVANLSP
22298642     YGYMPPEQFGGKTL-ASDLYALGMTLIYLATATPPDELP----QKELRVQFQPLVSLSP
17131853     PGFIPPEEQLGYSLSLASDLYSVGATLICLLANIRSVDIGKLIDSKGYFDFQKLDSDIDL
. : . * : * : . * * * * * * * * * * * * * * * * * * * * *

37521672      PLVRWLERLLEPALEERLGNA---REALETL
37521696      PMRAWFACMLAPEHQDRFDSA---REALESL
37519991      GLRHWVEKLVSDPERRFKNA---REAI---
113475351     SLANWINKITEIDLEIRFKNA---REALKCL
17133011     GLAAWLKTMTEPSVERRFSSP---QQALKAL
22298642     PFIRWLEKMOVAPALEERFDSATAARHALKQL
17131853     RFRSWLMGMVEPKWQYRYTNA---ADALAAL
: * . : : * . . . * :

```

Cluster No. 38 multiple sequence alignment

CLUSTAL 2.0.10 multiple sequence alignment

```
13472161 YELDERIASGGMGEVYRGHNIQTGDHVAIKIVLPEFARDQTILSLFRKEASILNHLSDA
27351864 YEIEAVIGAGGMGEVYKCREIQTGSPVAVKMLLPDMVDNEAALALFRREAAALHNLPDHA
126464610 YRVEARLGQGGMGTTWRGVNLTQDVVAIKVMTPEIALVPKAVELFRREAQLLRKVQSDA
119385168 WTVEGVLGRGGTGEVYRAKSLVTGRVVAIKALSAGFSGDEGYLELMRREE-AMRDILHDA
: : : . * * * . : : . : * * * : . : : * * * * : : : * *
```

```
13472161 VVRYHVFTIDPRIGRPYLAMEFVDGQSLFDVMRRGP-MRGEEVRRRLCHRLASGLAAVHQA
27351864 IVRYFLFTVEPVLQRPYLAMEFVNGRSLSNMLDDGP-LTFEALIKLMLRVASGLEAAHEH
126464610 VIRYET-TLQDREGRLYLIMEFVDGQPLSHYLERGARLAPGDVLRGRRMAGALAAIHAL
119385168 VVRYSDCSRTP-EGHVFLVMDFIDGPALSEAMAERR-LGMRELLIVAHRVAEGLVAAHAR
: : * * : : : * * * * * . * . : : : : * * . * * *
```

```
13472161 GAVHRDLSPDNIILPGGRVESAKIIDFGIARSAAVGGETLIGGKFAGKYNYVSPSEQLGLY
27351864 GIIHRDVSPDNIIVPLDDVRRAKIIDFGIARSTQMGDKTIIGSGFAGKDNYASPEQVGLY
126464610 GIVHRDVAPDNIMLPDGDIGHCKLIDFGLASNTSGTEASIIIGASYAGKYSYSSPEQFGLH
119385168 GVVHRDLSPDNVILRDGRVEGATVIDFGIAKDTAAGAHTVVGNQFAGKYEYAAPEQF---
* : * * * : * * * : : . : . : * * * * * . : : * * * * * . * * * * *
```

```
13472161 GGEVSEQSDIYSLGLVLAALRGKPLDMSGSQYEVIEKRR---TVPDLSDIDPDFQELIA
27351864 GNDVTAKSDVYSLGLVLFHALTGQKLDMGGSQFQLVEKRR---RVPDLGAVDMRIRPLLE
126464610 GARVGPASDIYSLGLVLMKVC-GLKVPGEGMGMAAVEVRRENVTIIPRDAGLPPALARLLE
119385168 DGKAEPASDLYALGALLLAAARGEVPFAGATPGEMIRRKA---ETLDVDTGLPEPLAGLIL
. . * * * * * * * . * . . : : : : : * :
```

```
13472161 AMLQPDPRDRPasmaeiara-
27351864 RMLQDPALRPT-MGEVASW-
126464610 AMLRTRPDERPADLQKLF---
119385168 WLSAPRIAERAPSAAAVVARL
: . * . . :
```

Cluster No. 39 multiple sequence alignment

CLUSTAL 2.0.10 multiple sequence alignment

```
126435516 YVLRGVLGAGGMAEVRDAWDTRLDRPVAIKILHPAM----NAQPETLNRFRDEARSAAML
126438334 YELREVLGLGGMAEVRDGDWTRLDRVAIKLLHPAM----RAQPDVRSRFEAEARSAAAL
120406349 YELRGLLGC GGMAEVRDGDWTRLDRPVAVKLLHPNF----NADADARARFCDEARSAAAL
145221981 YELRGLLGRGGMAEVRDGDWTRLDRSVAVKLLYPSQ----SSDSDVRRRFEDEARSAAAL
111017717 YELRGVLGRGGLADVYDGDWQRLARAVAVKVL RPEM----ASEPQTRRRFESEARLAATL
111018704 -----
120406030 YELRGVLGRGGMAEVRDAWDKRLGRPVAVKLLYPSV----SAHPDTRRRFAIEARAAAAL
145222263 YRLGPVLGRGGMAEVRDAWDQRLGRPVAVKLLYPSV----STQPDTRRRFATEARAAAAL
108805087 YRILRTLKGGMGRVYLAHDEVLDREVALKVL YRDL----AEHEDFVERFKREARSAAAL
21223157 YRLHERLGRGGMGIVWRATDQLLAREVAVKALPLDESL SAAEARRRRERTLREARAVAQL
41406116 YRLQRLIATGGMGQVWEAVDNRLGRRVAVKVLKQEF----SQDPEFIERFRAEARTTAML
```

```
126435516 SHPNIVAVHDYG----EQDGT-PFIVMERLPGRTLHDVMA-DGPLAPDQVRSMLDDVLAA
126438334 THPNIVAVHDYG----EDDGT-PFIVMERLPGRTLGDVIA-AGPMSPAQVRSMLGEVLAA
120406349 SHPNIVAVHDFG----EHDGR-PFIVMERLPGRTLADLIA-QGMPAPAQVRAMLDDVLAA
145221981 SHPNIVAIHDFG----EHDSA-PFIVMERLPGRTLADVIE-QGPMPAQVRRVLDVLAAL
111017717 NHPNVVAVHDSG----DDHGA-PYIVMERLPGRTLLD DLL-AGPLPAPRARTILTQTLDA
111018704 -----MHDCG----EDAGV-AFIVMERLPGRTLAD EIA-AGPVPDARVRSILADVLAA
120406030 NHPHVAVHDSG----VHDGR-HYIVLERLPGQSLADV LAHHGPLPVDHVRAIMRDVLSA
145222263 NHPHVAVHDTG----VHEGR-HYIVLERLPGQNLAD LLARHGPLPVEQVRAILRDVLSA
108805087 SHPNIVSVHDLG---VTGDGS-HFIAMEYVSGGTLE YLLKREGFLPPERARRIAAQIASA
21223157 RHPHVIVVHDV----VEDDGR-AYMVMELVDGGS LADRVLTRGPVDAVEAARIGVALLDA
41406116 NHPGIAAVHDYGESQLDGEGR TAYLVMELVNGEPLNSVLKRTGRLSLRHALDMLEQTGRA
      : **      .      : : : * : * * : * : .. : *
```

```
126435516 LSV AHSAGVLHRDIK PANILLSVTGDSVKVADFGI AKAGG-AAHTMTGQIIGTMAYMSPE
126438334 LEVAHAAGVLHRDIKPGNILLSADANTLKVADFGI AKTGG-AAYTMTGQIIGTLAYMSPE
120406349 LDVAHTAGVVRDIKPGNILLSATGDRMQVADFGI AKSGG-AAHTMTGQIVGTLCYMSPE
145221981 LSV AHAAGVLHRDIK PANILLTTAGDSVKVADFGI AKSAG-AAHTATGQIVGTLCYLSPE
111017717 LGAAHAAGILHRDIKPGNILF DAHG-TVKVTD FGI AKSAD-THTTTAGEVLGT VAYLSPD
111018704 LGAAHGAGILHRDIKPGNVLF TAAG-TVKVAD FGI AKSAA-SDHTATGQVLT VAYLSPD
120406030 LRAAHTSGVLHRDIK PANILF THFG-GVKIAD FGI AKSPD-TPQTLTNRVFGT MAYLPSD
145222263 LSA AHLSGVLHRDIK PANILF TEFG-GVKIAD FGI AKSPD-TPQTLTNRVFGT MAYLPSD
108805087 LGAAHERGVIHRDVKPNVLLT GSG-DAKVAD FGI ARAAALTTLTGTGFVLTARY ISPE
21223157 LDTAHASGILHRDVKPSNVL VADDG-RVVLTD FGI AQAQVAGATTLTESGSFVGSPEYTAPE
41406116 LQVAHAAGLVHRDVKPNILIT PTG-QVKITD FGI AKAVDAAPVTQTGMVMGTAQY IAPE
* . ** * : : * : * * * : * * : * : * : * : * : *
```

```
126435516 RVTGAPASVADDLYAVGVVGYEAI VGHRAF PQDSPVAVARAIMDDPPPPPLREVRPDLDPV
126438334 RVSGAPASVADDLYAVGVMAHEALLGRRAF PQDNPAVARAIMDDPPPPVTAFR TDVDP I
120406349 RVSGAPASVADDLYAVGVMGYEALLARRAF PQESPVALVRAIVDAPPPALAGLTGGADPV
145221981 RVMGAPASVADDLYAVGVMGYEALLGRRAF PQDNPAALARAI IDVPPPPPLRALSVTADPA
111017717 RITGKPASVTDDLYAVGVVGYEALAGHRPYTGD TILSLAHAI VGHGHEPLTAVRPDLAPT
111018704 RILGTPATTADDLYAVGVVGYEALAGHRPFAGDN ILSARAITDGAARPLRDARPDADPN
120406030 RIAGR PATPSDDLYALGVVAYEALTARRAY PQENLTALADAI AAGHLAPVATLRPDVDPA
145222263 RIAGR PATPSDDLYALGVVAYEALTGRRAY PQDNL SALADAI AAGRLAPLTSVRPDVDPA
108805087 QARGE PVGPPSDLYSLGIVLYEMLTGEV PFDAETPIGLAMKHMSDVPRPPKEANPAVPDD
21223157 RMSGAGTGPESDLWLSGLVLLCAVLSGASPFHRDSLGGVLHAVVTEEIRPPAQAGPLLP--
41406116 QALGH DATPASDVYSLGVVGYEVVSGKRPFSGDGALTVAMKHIKEP--PPPLPAELPPN-
: * . . * : : * : : : : *
```

```
126435516 LAGTIDRAMTRDPAQRFGDAAQMRAAV
126438334 LAGVIERAMTPDPPQRFSGSATQMRAAL
120406349 LAAVIDRAMSRDPRRRFGSAAQMRAAL
```

|           |                              |
|-----------|------------------------------|
| 145221981 | LVAVIDRAMSRDPRLRFGSAPQMRAAL  |
| 111017717 | LTTVIERALSQDPQORFATADQMRNDL  |
| 111018704 | LVHTIERAMARDPQORYADAQSMRDAV  |
| 120406030 | LATTIERSMARDPRWRFATADQMLACL  |
| 145222263 | LAATIERAIARDPRWRFATAEQMRRSL  |
| 108805087 | LNDLVMRLLSKAPEERP KDASALI--- |
| 21223157  | ---VVRGLLERDPRRLDAASAQRML-   |
| 41406116  | -----VRELIEITL-----          |

: :

Cluster No. 40 multiple sequence alignment

CLUSTAL 2.0.10 multiple sequence alignment

116622280 YEILALIGTGGMGEVVKAR-DTRLKRTVAIKVSKS-----NFINRAEHEARAVAALSHP  
116622762 YELLTPIGEGGMQVVKAR-DTRLGRTVAIKVSKT-----SFSERFEREARAVAALSHP  
116623587 YEIVGLLGTGGMGEVYAAV-DTRLGRKVAIKVSPA-----RFSGRFEREARAISALNHP  
94971261 YEIVGPIGNNGMGEVYKVR-HTISQRTEAMKVLSSGAARRPEVTDTRFVREIRVLANLNHP  
116622368 YSITGLIGRGGMGEVYHAVREDDFRMPVAIKLLKRGGG-TEMALRRFRIERQILAGFQHP  
\*.: :\* \*\*\*\*:\*: . . \*::: \* \* : : : .\*\*

116622280 NICMLY-----DIGPDYLVMEYIEGKPLQGPMPVETA----LRHAIEIAKALDAAHRVGI  
116622762 NICTLY-----DVGPDYLVMEYIEGKPLKGPVETA----LRHAIEIAKALDAAHRLGI  
116623587 NICTLH-----DVGPNYLVTTELVDGETLRDWLKRATAGERYLDVARQVLOALCAAHRAGI  
94971261 NIAALHTA-FHHEDQLIMVEFIEGKNLSEMLSTGMVLRDSVAYIRQAVTALAYAHSQGV  
116622368 NIGRLLDGGATASGLPYLVMEYIEGVPLLEYAAGLPVRER-LRLFLAVCSAVQYAHQRHV  
\*\* \* . :\* \* ::\* \* . : \* : \*\* :

116622280 IHRDLKPANILVTKSG-IKLLDFGLAKVT---AASAVSDETVTRGLTEEGSILGTLQYMA  
116622762 VHRDLKPGNVLVTRTG-IKLLDFGLAKVTT--AAAAASEETVTRALTEEGTILGTLQYMA  
116623587 VHRDLKPANIMVRFDGIVKVLDFGLAKWITPGGHSVQLEPPATMTLSQPGQIVGTVAYMS  
94971261 IHRDIKPSNIMINSAGQVKLLDFGLALMS-----TPDPRLTSSGSLLGSVHYIS  
116622368 VHRDIKPANILVTVDGIPKLLDFGIKLLHP-----STADRGPSPTAADNAVMTPEYAS  
:\*\*\*:\*\*.\*:~: \* \* :\*\*\*\*\*: : . : : \* :

116622280 PEQLAGGEADARSDIFAFGCVLYELLSGEPAFAAASRAGIIAAILEREPKA----LPAAP  
116622762 PEQLEGKEADARSDIFAFGCVLYEMLTGAPAFGTGGSRASIIAAIMDREPKA----LPEAP  
116623587 PEQILGQEVQDQSDLFAGFIILYEILSGLHPWPRKSAVDTMHAILHDEPAS----MHAIP  
94971261 PEQIRGETMDARSDLYAVGVTLFEVITGRLPIQGHFSFEIINGHLQVIPPSPAVLNACIP  
116622368 PEQIRGEPVTIATDIYSLGALLFEVLTGRQAPRPGN-----GEPAA-----HEMD  
\*\*\*: \* :~:~:~.\* \* :~:~:~\* . . \* :

116622280 AHVAATLQRCCLAKDPDDRWSARDL----  
116622762 ASLESAIRQCMKDPDERWSARDL----  
116623587 ANIARIVRLLRKNPTDRFASAEVLDFAF  
94971261 ANLAAITLKALAKNPSERFQNASEFLQAL  
116622368 AELAAILRKALRQPKERYASVAELSDDV  
\* : : :~:\* \* : . . :

Cluster No. 41 multiple sequence alignment

CLUSTAL 2.0.10 multiple sequence alignment

116622459 YEILARIGEGGMGEVYRATDTRLHRTVAVKISC-----DQFGERFEREARAVAALNHPN  
116625320 YTLISPLGEGGMGEVWKARDTRLDRAVALKISK-----AAFTERFEREARAVAALNQP  
116622825 YEILALIGKGGMGEVYRAHDPRLRRDVAIKISS-----VRFDQRFEREARAIATLNHPN  
116626668 YEILAPLGAGGMGEVHRALDTRLNREVAIKVSQ-----ERFSDRFEREARAVAALNHPN  
83647568 YKIIRKIGEGGMGWVYKAEDTRLERYVALKCLAPEVATDERVRFRLMQEAKAISRLDHPN  
\* :: : \* \*\*\*\* \* : \* \*.\*\* \* \*\*:\* . \* : \*\*:\* : \* : \*\*

116622459 ICQIYDVGPN-----YLVMEYIEGLPLR-----GPLPLDQALRYAAQICDALDAAHTKSI  
116625320 ICTLHDVGPN-----YLVMEFVEGVPLK-----GPLPVEKAVEYAGQILEALDAAHRKGI  
116622825 ICQVYDVGPD-----YLVMELVEGITLKERIKEGAIPLEEALRIAGQIAEALSAHERFI  
116626668 ICHLYDVGPN-----YLVMELVEGESPK-----GPLSLEKALDYARQIADALEAAHEKGI  
83647568 VCVIHDVGMDSGGMYIAMQYYSGETLENALTKGALAPDQVVRIAKQIAYGLQAAHQDI  
\* \* : \*\*\*. \* : \*\* : \* . . \* . . : : : \* \*\* \*.\*\*\* : \*

116622459 VHRDLKPANILVTRSG-VKLLDFGLAKIEQAVAA-----GSDTMTLALTGKGQILGTLHY  
116625320 THRDLKPANILVTRQG- IKLLDFGLAKQRTPLPQ-----DGATLTRALTSQGEIVGTLQY  
116622825 VHRDLKPDNIKIKPDGTVKVLDFGLAT-VGGAPAPLDSEDSPTSSMSLTQAGAILGTAGY  
116626668 VHRDLKPANIKITPEGKVKVLDVDFGLAKRIQSDGTSYNSSENSPTLTNTATQAGAILGTAA  
83647568 IHRDIKPANILLSGIVKILDFGIK-----LSGVDITLGGARMGTLRY  
\*\*\*:\*\* \*\* :. .\* :\*:\*\*\*:\*. \* \* :\*\* \*

116622459 MSPEQLQKDGARSDIFAAGLVLYEMLTGKRAF DG DSPASVIGAILERQAPSIADVAPA  
116625320 MAPEQLHGKDADARSDLFAFGCVFYEMLTGKRAFEGESAASVIAAILERE-PAPLTVAPP  
116622825 MSPEQARGKPDARSDIWAFGVVLYEMLTARRLFQGDDELTEILASVVKEE-PNLASVPPQ  
116626668 MSPEQARGKNVDKRADIWAFGVVLYELLVGERPFHGDDELTEILASVVKES-PDLSRVPLK  
83647568 MSPEQLQGRDMGLQTDVWSVATLIYEMLTGREMF DGEKSSTVLHVMHEEPDYSLAVFQE  
\* : \*\* \* : . : \* : : . : \* : \* . . . \* . \* . : : : : . \*

116622459 A--LDRILKRCLAKDSGDRWHAADLKAAL  
116625320 ---LDRIVRRALAKDPDQRFQ TALDLKAAM  
116622825 ---VRRLL EACLQKDPTRRLQAIGDRRL-  
116626668 ---VRRLLGACLEKDPQRRLRDIGDAW---  
83647568 YPLFKRLLTAMLHKKPEKRLDSMGKVLQWL  
. \* : : \* \* . . \*

Cluster No. 42 multiple sequence alignment

CLUSTAL 2.0.10 multiple sequence alignment

9945898 FDIERELGEGAMATVYLATQRSRQKVALKVMAAALAADPSFAERFLREGRTLARLSHPN  
90022079 YKILRTLKGGMATVYLAEQEIFEREVALKVMSKSLAEDPSFGQRFMREKIVSOLVHPN  
51246425 YCIEKIGVGGMADVYKAEDTELGRQVALKLLPPEFARDAERVTRFDKEVCAAAALMHQN  
83647361 YEILDEVAEGMAKVFARQTLADRIVAIIISPAICLNKEFRQRFIQEAQITAKLNHPN  
: \* :. \*.\*\* \*: \* : \* \*\*:::. :. : . \*\* :\* : \* \* \*

9945898 TVTIHDIGNVGVSCYYMAMEYLPNGTLKERIQQG-LDPEQGLAYVRQVAAALGYAHSQGLV  
90022079 IVTVHDVGVHEGYYYLSMQVIDGLDLKQ-SRRS-LSLRQKVTAIRDIKALDYAGSKGYV  
51246425 IVTLYDVTHVDGYHFYTMDLITGGDLKEKIKQG-LSPEAAVNILLELGKALSHAHAKFV  
83647361 IIQIYDIAPFEDTFFISMEFMEGSLTERIRSGRLTRDESTRIILQLAEAMNYAHKLGVI  
: ::: : . : : \* : : . \* : : : \* : : : \*

9945898 HRDVKPANILFR-ADGTAVLSDFGIAKSIEDNTQFTQVGFVGTSPSYMSPEQARGQEIDG  
90022079 HRDIKPENILFHTSDGRAVLTDGFIARAAESDLTMTQTGTAIIGTPHYMSPEQAKGLAVDH  
51246425 HRDIKPENLFR-EDGTAVLTDGFIKAVGTATQMTKTGMSIGTPHYMSPEQARGIGVGY  
83647361 HRDIKPGNILFR-ADDTPVLSDYGIAKSLYHRGDLTTTGSILGSPPYMSPEQAMGRQLDH  
\*\*\*:\*\* \*:\*\* : \* .\*\*::\*\*:: : \* . \* :\*\* \* \*\* \* \* :.

9945898 RADLYALGVVLYEILTGKLPYNGKDSLSTALAHLTEPLPELPIEQGRYQDILRQLLAKDP  
90022079 RADLYSLGVVYLLLANRPFDAESAVAIGIKHITQAIPLLPAYNQLOPLIDKLMAKKV  
51246425 RSDLYSLGILFYEMLVGSPYDSEDTIAIAYSHVNDPVPELPSQFRKYQPIVDHLLAKSS  
83647361 RADWYSLGIVFYQMLTGAVPFEATDPIISLGIKHKQEPPLPSHLRMYQQLMDLLLAKEP  
\*:\* \*\*::\*\* :\*. . :\*\*:. . : : . \* :. \* \*\* . \* : : \* :\*\*.

9945898 AERFPTAGALIAAL  
90022079 EDRFQSAKELIDAL  
51246425 ADRYVDAATMVRAI  
83647361 ERRSSLDEFRAHL  
\* : :

Cluster No. 43 multiple sequence alignment

CLUSTAL 2.0.10 multiple sequence alignment

```

86739661      YTLLGKLGQGGMGVYLGRSGKRLVAIKVIRNEAVGNPEFRARFRLEAETARRVARVCT
86742078      YRLRGLRGVGGMGVVYLAEDPHHPVAVKVIKIRVEFAADPEFRARFRHEAEEAARRVPRFCT
86741942      YQLVARLGQGGMGIVYLGRSRDGRPVAVKVVRTDLARQPEFLARFRREAEVAQRVARFCT
86742102      YRLVRRLGAGGMGTVYLGENAAGGLVAVKLIRADLARLAEFRSRLKQEADNARRVARFCT
86743100      YVLLSRLGVGGMGTVYLRNLRAGRRVAIKVIRPDLADEEFRRRFRAEVEAARKVAPFCT
86742726      YTVERKLV DARTGPVFLARNGEARPVLVKTITAPFGRDAEFRRLRVDLDNIRRLAPSCL
*   :   :*   .   *   *:*...   *   :*   :   **   *::   :   :   :   :   *

```

```

86739661      AEVL DADPDAEWPYLVTEFIEGETLARYVQRNGPLADANLEQLAVGVAAALTAIHSAGIV
86742078      AAFLDADPNAERPVLVTDYVPGPTLAQAARR--PLRGAELEQVAVHIAVALTVIHGAGVV
86741942      AEVLEVDVEADRPYLVTEFIDGPTLADAI AANGPMAEADLERLAI SVAAALTAIHAAGMI
86742102      AAVLDVDITADPPYLVTEYVDGPTLSEAVGTRGPLTPAELHQ LAVSMTTALMAIHRAGLV
86743100      AEVL DADPNAPAPYLVTEFIDGVRLDMQVDK--GPLTSSTLTGLAVGVATALTAIHSAGLV
86742726      AAILDLDTGARPPYVVAEFIDAPTLAATVAGGAALS GPDTYRLAVGLATALAALHELEIF
*   .*:   *   *   **:*:::   .   *   .:   .   **:   ::*   .:*   :.

```

```

86739661      HRDLK PANVILSPFGPRVIDFGIARAVDAGSNLT--GDLQQLGTPAFMSPEQIESRPITS
86742078      HRDLKPSNVILSPTGARVIDFGIARAH--GMTMF--HIDEQIGTPAYTAPENIDGAPPDP
86741942      HRDLKPSNVLLSRLGPRVIDFGIARAMDSTTSLT--TSTGLIGTPAFMAPEQARGALVTA
86742102      HRDLKPSNILLSRLGPKVIDFGIARALDSATVLS--GDR--QLGTPAFMAPEQALGEQVTS
86743100      HRDLKPSNVMLSLSGPRVIDFGIAQALEGAKAK--PTAWGFGSAGWMAPEQVHGQPIGP
86742726      LGDLKPINVVLSGQGVRLVDFGLFRAMNAVSI NNPGPPSGIGTLAFITPEQALGQTATV
      *****   *   :*::*::*   :*   :*   :*   :*   :*   :*   :*   :*

```

```

86739661      AVDIWAWGGLVAF AATGHYPFGEASAQVLLYRALHEEP--QLDDVDPALRPVWHAMRKDP
86742078      AADIFAWGGVVL YAATGQPPFGDRSSELLHRI RYDHPHNLNQLHGRLHDTVTAAMAKAP
86741942      AADIFAWGGVVT FAGTGIGPFGKATTPVLLYRAVHEAP--KIDGLPDGLRSIVAKTMSKEP
86742102      AADVFAWGGVLI FAGTGRYPFGNGPAPSVLYRTVNDPP--TLDGFEDSLRPLVSDAMRCAA
86743100      EADVFAWGIL IAYAGTGRHPFGDGTDIDLGM RIVGSAP--DLRGLPQPLVGLVSAALAKHP
86742726      ASDVFTWGGMLLFAATGRPPFGAGTPRVLLQRAVYAEP--DLSVFCPELRELVAAMRKDP
*   :*::*   :*   :*.*   ***   .   :   *   *   :   .   *   *   :*   *   .

```

```

86739661      STRPSAQQLMLRL
86742078      EQRPTAEQLYRML
86741942      ADRPTASDLYQSL
86742102      AERPTAEKLYARL
86743100      DDRPSARDLLLRL
86742726      KRRPAAAEELLEQL
      **:*   .*   *

```



Cluster No. 44 multiple sequence alignment

CLUSTAL 2.0.10 multiple sequence alignment

```
24983617 -----HSRQSLLYKVRDSQNQPWLLKTLPTAREQEPGAAQGLLLEEWFLRRIAGRHF
26988816 -----HSRQSLLYKVRDSQNQPWLLKTLPTAREQEPGAAQGLLLEEWFLRRIAGRHF
104780903 WKVDALLGQSRQSQLYRVRDEQGQAWLLKTLPQVDEVEPQAIQSLLLEEWFLRRVAGRHF
28852745 WNVGDIVAQSRQSQLYRVRKDAHQPWLLKTLPTSRHDEAGAGQGLLLEEWFLRRVAGRFF
28869503 WNVGDIVAQSRQSQLYRVRKDAHQPWLLKTLPTSRHDEAGAGQGLLLEEWFLRRVAGRFF
9947763 WRVRQLLGESRQSLLYRVEDGQGQPWLLKTLPAARADDPLATQALLLEEWFLRRVQGRHF
119897580 LTVEEVLHHSVTLTLLYRVADAQGRQRLKTLRNG-AGDVENCQALVYEEWLARRVVDSRF
          .* : **:* * :.: :***** : *.: **: **: . *
```

```
24983617 PELHAASQRQHLYYVMREYPGQNLAAALLAEQGPLPLPQWLEVARQLLQAVGVLHRRNLLH
26988816 PELHAASQRQHLYYVMREYPGQNLAAALLAEQGPLPLPQWLEVARQLLQAVGVLHRRNLLH
104780903 PETHPANQRQHLYYLMREYPGETLATLTFATHGPLPLPQWLEIARQLLHAVGALHRRNLLH
28852745 PEVHSLAQRQHLYYVMREYPGSTLAEVFRRNGPLPLVQWQDLATRVLRATGLLHRRNI IH
28869503 PEVHSLAQRQHLYYVMREYPGSTLAEVFRRNGPLPLVQWQDLATRVLRATGLLHRRNI IH
9947763 PELHGLAQRQHLYYLMREHPGETLAERLRNHGPLSLPEWLGLANQLLRGLGQLHRRNLLH
119897580 PEVIDWPGRHHLYYLMWHEGATLKARLAAGHRFSPAQVVVELGGEILRGV GALHRLAIVH
**      *.:****:* : * .* : :. : :. .:*. * *** :.*
```

```
24983617 RDIKPDNLHLGRDGLRLLDFGLAYCPGLSEDPLHELPGTSPSYIAPEAFDGHPPSPRQDL
26988816 RDIKPDNLHLGRDGLRLLDFGLAYCPGLSEDPLHELPGTSPSYIAPEAFDGHPPSPRQDL
104780903 RDIKPENLHLGSDGQLRVLDLDFGLAYCPGLSEDLPHLTPGTSPSYIAPEAFDQPPSPRHDL
28852745 RDIKPENLLLGNLGDGELRLLDFGLAFCPGLSATNAEDLPGTSPSYIAPEAFNGAEAHPRQDL
28869503 RDIKPENLLLGNLGDGELRLLDFGLAFCPGLSATNAEDLPGTSPSYIAPEAFNGAEAHPRQDL
9947763 RDIKPENLHLGRDGLRLLDFGLAWCPGLSREDPHLLPGTSPSYLAPECFSGTSPSVRQDL
119897580 RDIKPDNLHLDAHGRLRILDGLVAASDGAFNEINN-PGTSPSYMAPELFAGERANEASDL
**:*:*:*:* * . *.**:*:*:*:* * * : . *****:*:* * * . **
```

```
24983617 YAVGVTLYHLLTGHPYGEVEAFQRPFRGQPVNAARYRPDLPEWLQHNLLQAVASDPAQR
26988816 YAVGVTLYHLLTGHPYGEVEAFQRPFRGQPVNAARYRPDLPEWLQHNLLQAVASDPAQR
104780903 YAVGVTLYHLLTGHPYGEIEAFQRPFRGAPVSAARYRPDLPEWLQRNLEQAVANPAHR
28852745 YAVGVTLYLLTGHPYGEIEAFQHRRFGTPIPASRYRPDLQWLSQSLDKALQADPDQR
28869503 YAVGVTLYLLTGHPYGEIEAFQHRRFGTPIPASRYRPDLQWLSQSLDKALQADPDQR
9947763 YATGVCLYQALTGRYPYGEIEAFQHPRFGRPVPPSRYPDLPAWIDLLLRVACDPAQR
119897580 YAVGVTLYELLARRYPYGEIEPFQKPRFGDPVAVTRYRPDTPDWLEAILLKAVAPTPAER
**.* * * * : :*****:*.**: *** * : ***** * *:. * :*: * .*
```

```
24983617 FETAEHWL---
26988816 FETAEHWL---
104780903 FETAEQWLLLL
28852745 YETPEQWLLEL
28869503 YETPEQWLLEL
9947763 FETAEEWLLSL
119897580 FETAEEFLAL
          :**.*.:*
```

Cluster No. 45 multiple sequence alignment

CLUSTAL 2.0.10 multiple sequence alignment

```
118477730      YKIESVIGMSYGVTYVVNDLQINRYKVLKQLRQSKQRYVSGRKSFEQEKMILQTLNHHA
30256946      YKIESVIGMSYGVTYVVNDLQINRYKVLKQLRQSKQRYVSGRKSFEQEKMILQTLNHHA
29895941      YKIESVIGMSYGVTYVVNDLQINRYKVLKQLRQSKQRYESGRKSFEQEKMILQTLNHHA
30020390      YKIESVIGMSYGVTYVVNDLQINRYKVLKQLRQSKQRYESGRKSFEQEKMILQTLNHHA
138895192      YEIIIEELGMSYGIAYKGRDRDTGRLVVIKQARRTKG--EDGRRLLQREADVLSRLRHPQ
52784213      YRINRVLGMGNYGITYLAEELGRSGFRVIKQQRKTKAWTSAGRRSFNREAEILRELDLPA
*.*      :***.**:*  .:  .      *:** *:*      **: ::*  :*  *
```

```
118477730      IPSLYDHFVWEKKSFFVMEYMPGKNFEDYIFLDGHVYTEREVLKILYEILEIVSVFHSKG
30256946      IPSLYDHFVWEKKSFFVMEYMPGKNFEDYIFLDGHVYTEREVLKILYEILEIVSVFHSKD
29895941      IPSLYDHFVWEKKSFFVMEYMPGKNFEDYIFIDGYVYTEREVFEILYEILEIVSVFHSEG
30020390      IPSLYDHFVWEKKSFFVMEYMPGKNFEDYIFIDGYVYTEREVFEILYEILEIVSVFHSEG
138895192      IPARYDTFIEGGQPHLVMDYIDGQTVEDQIFGLGITYTEQAARLLLDVLDVVRYIHASG
52784213      APRLYEVLRAAGERFIVMEYIEGKTFEDLLFYDGRVDFEQQTISILKEVLHVSLLHSRG
*  * :  :  : :***:*  *..**  *  *  .:  * :  :  * :*.  *  * :  :
```

```
118477730      I IHRDLRIPNILMKENQISIIDFGLAKLKGEGDERATTYEGEQALMREVVHFRSDFYALGH
30256946      I IHRDLRIPNILMKENQISIIDFGLAKWKGEGERATTYEGEQALMREVVHFRSDFYALGH
29895941      I IHRDLRIPNILMKENQISIIDFGLAKWKGEDDERATTYEGEQALMREVVHFRSDFYALGH
30020390      I IHRDLRIPNILMKENQISIIDFGLAKWKGEDDERATTYEGEQALMREVVHFRSDFYALGH
138895192      I VHRDLRIPNIIWRHGTVAIIDFGLACRMGERVDLRDDDPLEKRLRREPHRSDYALGH
52784213      I IHRDLRIPNLIVNRGTIRIIDFGLACRLTERERVDNRHP-EKKLMRAVSVKSDYALGH
*:*****:  . . . :  *****  *  *  *  *  *  *  *  *  *  *  *  *  *
```

```
118477730      FSLFLLYAGYESNEKYEKPYDELLENYNREMLMRMLQMKTPYYENVRDLKKDVAFALF
30256946      FSLFLLYAGYESNEKYEKPYDELLENYNREMLMRMLQMKTPYYENVRDLKKDVAFALF
29895941      FSLFLLYAGYESNEKQEKPYEELTLEHYNREMLMRMLQIKTPYYENVQDLKQDVASALE
30020390      FSLFLLYAGYESNEKQEKPYEELTLEHYNREMLMRMLQIKTPYYENVQDLKQDVASALE
138895192      FTLFLLYSAYEPTSEDEKSWEEELDLSPKARAMLRKMLQLDAP-YDHVDELIADVKQLL-
52784213      FALFLLYSGFTPSDEEEKWEEELSISGLKSVLRKMLQIDLQ-YERAEDIIGDL-----
*:*****:  . . . :  ** *  :**  .  :  *  *  *  *  *  *  *  *  *  *  *  *
```

```
118477730      RMEVPCFKSF
30256946      RMEVPCFKSF
29895941      RMETPCF---
30020390      RMETPCF---
138895192      -----
52784213      -----
```

Cluster No. 46 multiple sequence alignment

CLUSTAL 2.0.10 multiple sequence alignment

```

120401718    YEIKGCIAHGGLGWVYLAFDKNVNDRPVVLKGLVHSGDAEAQAIAMAERQFLAQVTHPGI
126433142    YEIKGCIAHGGLGWVYLAFDHNVNERPVVLKGLVHSGDAEAQAIAMAERQFLAEVTHPGI
1817676      YEIVKGCIAHGGLGWIYALDRNVNGRPVVLKGLVHSGDAEAQAMAMAERQFLAEVVHPSI
31791588     YEIVKGCIAHGGLGWIYALDRNVNGRPVVLKGLVHSGDAEAQAMAMAERQFLAEVVHPSI
41409991     YEIVKGCIAHGGLGWVYLAVDHNVNDRPVVLKGLVHSGDAEAQAIAMAERQFLAEVVHPQI
19553944     YEVLGVIAHGGMGWIYLANDRNVSGRIVVLKGMMAQSSVQDQGTAEAREFLADITHPGI
23494432     YEVLGVIAHGGMGWIYLANDLNANRVVVLKGMMAQTSAQDQGTAEAREFLADITHPGI
38234610     YEIVAGVIAHGGMGWIYLAHDRNVSGRMVVLKGLRDKAKPQDYGAVAEKEFLADITHPGI
68535317     YEILGPIAHGGLGWVYIAIDHNVADRYVVLKGMMAATENEQERAVAESERAFADITHPGI
** : * *****:***:* * ** * *****: . : . * **: ***:..** *

```

```

120401718    VKIYNFVEHEDKHGPNVPGYIVMEYVGGTSLK-QATAQKGTPLPVAEAI GFMLEILPALGH
126433142    VKIYNFVEHEDKHGPNVPGYIVMEYVGGTSLK-QARGQ---RLPVAQAI GYMLEILPALGY
1817676      VQIFNFVEHTDRHGDPVGYIVMEYVGGQSLK-RSKGQ---KLPVAEAI AYLLEILPALS Y
31791588     VQIFNFVEHTDRHGDPVGYIVMEYVGGQSLK-RSKGQ---KLPVAEAI AYLLEILPALS Y
41409991     VQIFNFVEHVDRHGPNVPGYIVMEYVGGQPLR-HGKGE---KLPVSEAI AYVLEILPALGY
19553944     VKAYNFIDDPVPG---GFIVMEYVNGPSLKDRCQAQPDGVL RVDLAI GYILELLPAMDY
23494432     VKAYNFIDDPVPG---GFIVMEYVNGPSLNDRRKQKDGVL SFDLAI GYILEVLPAMDY
38234610     VKSYNFIDD-----LIVMEYVEGPALR-----GMAIDLAI GYILEVLPALDY
68535317     VKIFNFIDDPSPG---GFIVMEYVGGPSLRGQRRLAAGVLDL DVAI GYILEILPALDY
* : **:. . ***** * *. . : . **.:***:***:..

```

```

120401718    LHSIGLVYNDLKPENVMVTEQDKLIDLGAVSRINSFGYLYGTPGYQAPEIVRTGPTVAT
126433142    LHSIGLVYNDLKPENIMLTEDQVKLIDLGAVSTINSFGYLYGTPGYQAPEIVRTGPTVQS
1817676      LHSIGLVYNDLKPENIMLTEEQLKIDLGAVSRINSFGYLYGTPGFQAPEIVRTGPTVAT
31791588     LHSIGLVYNDLKPENIMLTEEQLKIDLGAVSRINSFGYLYGTPGFQAPEIVRTGPTVAT
41409991     LHSIGLVYNDLKPENIMLTEEQLKIDLGAVSRINSFGYLYGTPGFQAPEIVRTGPTVAT
19553944     LHQRGVVYNDLKPENVIATEDQVKLIDLGAVTGIGAFGYIYGTKGFQAPEVATHGPSISS
23494432     LHSRGVVYNDLKPENIIATEDQVKLIDLGAVSGIGAFGYIYGTKGYQAPEVATQGPSVAS
38234610     LHSRGVVYNDLKPENIILEDQVKLIDLGAVSGIGAFGYIYGTKGYQAPEVASDGPSIAS
68535317     LHSRGVVYNDLKPENIILEDQVKLIDLGAVTGIGAFGHIFGTKGFQAPEIAKTGPTVAS
** . * :.*****:***: :*:***:*****: *.:***:*** *:*:***:.. **:. :

```

```

120401718    DMYTVGRTLAALTLKLRTRKGRYVDGLPEDD--PVLATYDSYGRLLRRAIDPDPRRRFQS
126433142    DIYTVGRTLAALTLELRTRKGRYVEGLPEDD--PVLAQYDSFGRLLRRAIDPDPRRRFAS
1817676      DIYTVGRTLAALTLDLPTNRNGRYVDGLPEDD--PVLKTYDSYGRLLRRAIDPDPQRQFTT
31791588     DIYTVGRTLAALTLDLPTNRNGRYVDGLPEDD--PVLKTYDSYGRLLRRAIDPDPQRQFTT
41409991     DIYTVGRTLAALTLDLPTNRNGRYVDGIPDND--PVLGTYDSFRLLRRAIDPDPRRRFSS
19553944     DIFTIGRTLAALTMPLPVEDGVLAPGIPSPKNSPLLRRHLSFYRLLQRATADDPQHRFRN
23494432     DIYTIGRTLAALTLKLPVEDGVLAPGIPSPNDQPQLRRYLSFYRLLLRATAEKPEDRFTS
38234610     DIYTIGRTLADLTIDLNDGAGGKKD-LPTADEEPLFAQNLSFYRLVRRCTRSDPAKRFSS
68535317     DIYTVGRTLAALIVKLPVEDGVYAPGLPTPDEEPLFREYLSLYRLLLRATDEDPEARFSS
*.:***:***** * : * * : * . * : * ** : * . * ** .

```

```

120401718    AEEMSSQLM-
126433142    SEEMSSQLL-
1817676      AEEMSAQL--
31791588     AEEMSAQL--
41409991     TEEMSAQLM-
19553944     VSELRTQLYG
23494432     VAELRTQLFG
38234610     VRELETQLYG
68535317     ATAMANQLI-
: **

```

Cluster No. 47 multiple sequence alignment

CLUSTAL 2.0.10 multiple sequence alignment

```

108760330      LELLELLGRGGMGVEVWLRQOSLGRVAVKLLPPRLAKDPEFVTRFEKEATALAALNHPH
32475155      LQITELLGAGGMGAVYKARQEGLDREVVALKILPEEFGHDVKFALRFTREARTLAKLNHPN
116620001      YEILAPIGAGGMGAVYKALDTRLNREVAIKTV-----SEQHMLRFDREARAIAALNHPH
116621582      YRIETLIGSGMGSVYRAVDTRLDRVAIKIP-----AQPFDARFEREGRSIAALNHPN
      .:      :* **** *: * :  *.* **:*          .  ** :*. ::* ****:
    
```

```

108760330      IIQIIDRGVAGEHYFYVMEYVEGRSLREAMSAG-LPPEKGIKLLLAVARAIECAHDKGII
32475155      IVSVYEFQVDDTYFYFLMEYVVDGSTLRDVVAAGQLAPAHALAIVPHLCDALQYHDNGVI
116620001      ICALYDVGDS----YLMMEYVEGSPL-----KGPVPVPEAVRLATQIVEALAAAHAKGII
116621582      ICTVHDVGNP----YLMELIEGPTLAERIRKGPVPLEEALAIARQIAAALDTAHQRGLI
      *  :  :  *      *::** ::* .*      * :.  .:: :  :  * :  ** .*:
    
```

```

108760330      HRDLKPENILLDGRGHVKVADDFLAG-----IRAP-DSRLQLTATSVMAGTLNYMAPE
32475155      HRDIKPENILMAVDGSKVIADFGLSR-----ILGDQDQPSALTGTHQIMGTPRYMAPE
116620001      HRDLKPGNVLLTASG-VKLLDFGLAKFAEQ-PQLDADST--LTQTGIGTVLGTASYMSPE
116621582      HRDLKPANVKVKPDGTVKVLDFGLARFAITDPPGDDDPHSLAVTQAGAILGTPHYMAPE
      ***:** *: :  * ** : ****:          *      **: **:**
    
```

```

108760330      QRRDAKNVDGRADLFLSLGIIILYEVLTGELPLGRFKLP---SSKVPGLDPRVDP-----V
32475155      QLEGARGVDHRADIYSLGVVIFYEMLTGELPIGRFAVP---SKKVQ-IDVRLDD-----V
116620001      QAQ-GRPADSRSDVFSFGAVLYELLCGKQAFHEDTAIGTIAAVVHKEPAPLQAPPDLTRI
116621582      QAL-GKSADKRADIWAFGVILYEMVTGARPPFGD-----VPVWDRVPAAIRP-----L
      *   .: .* *::*::*::* ::*::* *   .:          :          :
    
```

```

108760330      VDRLLEQDPAARYEKASELCAAL
32475155      VLRTLEKEPQRRYQRASQIKSDV
116620001      ISRCLSKAPCDRFQTMSDL----
116621582      LTRCLQKDPAHRLRDIGDAPFL-
      : * *.: * * .  .:
    
```

Cluster No. 48 multiple sequence alignment

CLUSTAL 2.0.10 multiple sequence alignment

```
4377006      YHVKKILSKKLRSRVVHGLHPETRHSTVIKVFSPSPSFTSRSVYNFLKEAQLHQITHPN
8163351      YHVKKILSKKLRSRVVHGLHPETRHSTVIKVFSPSPSFTSRSVYNFLKEAQLHQITHPN
8979075      YHVKKILSKKLRSRVVHGLHPETRHSTVIKVFSPSPSFTSRSVYNFLKEAQLHQITHPN
33242061     YHVKKILSKKLRSRVVHGLHPETRHSTVIKVFSPSPSFTSRSVYNFLKEAQLHQITHPN
29834154     YHIKLLSKKEGSTVYQGVHPDTLQPAAIKVLATPLVTDTPRVHNFLEKARIIEQISHPN
29839807     YHIKLLSKKEGSTVYQGVHPDTLQPAAIKVLATPLVTDTPRVHNFLEKARIIEQISHPN
89898773     YCIKRIMSKKEGSTVYHGVPVTLQPTVIKVLVTPLVADTLRVHNFLEKARIIEQISHPN
3329124     ----RELSRKVGLTVYQGVDEHSSRPVVIKTLVSPGIHRRFLRAFEFEARIMQLVTHPA
              : :*: * :*: : :...*: : ..      : * :*: :. :*:
```

```
4377006      IVKFHRYGKWQDCLYIAMEYIEGISLREYILAQFISLPQAIDIIIFDIAQALEHLHSRNIL
8163351      IVKFHRYGKWQDCLYIAMEYIEGISLREYILAQFISLPQAIDIIIFDIAQALEHLHSRNIL
8979075      IVKFHRYGKWQDCLYIAMEYIEGISLREYILAQFISLPQAIDIIIFDIAQALEHLHSRNIL
33242061     IVKFHRYGKWQDCLYIAMEYIEGISLREYILAQFISLPQAIDIIIFDIAQALEHLHSRNIL
29834154     IVKLYQYGQCREGLYIAMEYIQGVSLRHYILSQLIPLSRAIDIILHIAQAIEYLHSRGIL
29839807     IVKLYQYGQCREGLYIAMEYIQGVSLRHYILSQLIPLSRAIDIILHIAQAIEYLHSRGIL
89898773     IVKLYQYGQCREGLYMAMEHIQGVSLRKYILSQLIPLSRAVDIILQIAQALEYLHSRGIL
3329124     FVRLEDRGECEQGRYLVEYILGSSLRDSILSSQISLDKAISIVLQVAQAITTLHRHGVL
              *: : * : . : * : * * * . * : . * * : * : * : * : * : * : * : *
```

```
4377006      HKDIKPENILITPQGKIKLIDFGLADWDTEIQRAHPSVIGTPYYMSPEQRQGESHPASD
8163351      HKDIKPENILITPQGKIKLIDFGLADWDTEIQRAHPSVIGTPYYMSPEQRQGESHPASD
8979075      HKDIKPENILITPQGKIKLIDFGLADWDTEIQRAHPSVIGTPYYMSPEQRQGESHPASD
33242061     HKDIKPENILITPQGKIKLIDFGLADWDTEIQRAHPSVIGTPYYMSPEQRQGESHPASD
29834154     HRDIKPENILITSQGNIKLIDFGLAISS-IDKDARPLYLGTSPSYMSPEQRQGDKISELSE
29839807     HRDIKPENILITSQGNIKLIDFGLAISS-IDKDARPLYLGTSPSYMSPEQRQGDKISELSE
89898773     HRDIKPENILITPQGEIKLIDFGLAASSMANDPYPVCLGTSPSYMSPEQRQGDKISENSE
3329124     HLDIKPENIVLSQSGEIKLIDYGLSAWQ-----FNHWGSPAYMSPEQSRQEPSPASD
              * * * * * : : . * : * * * : * : . * : * * * * * : : * * :
```

```
4377006      IYALGLLAYELILGHLSLGRVFLSLVPERISKILAKALQSPNNRYSSTREFIQDI----
8163351      IYALGLLAYELILGHLSLGRVFLSLVPERISKILAKALQSPNNRYSSTREFIQDI----
8979075      IYALGLLAYELILGHLSLGRVFLSLVPERISKILAKALQSPNNRYSSTREFIQDI----
33242061     IYALGLLAYELILGHLSLGRVFLSLVPERISKILAKALQSPNNRYSSTREFIQDI----
29834154     IYSLGLIAYELILGNLALGKVVLSLIPDRVSKILAKALQSPPTDRYASMKEFI-----
29839807     IYSLGLIAYELILGNLALGKVVLSLIPDRVSKILAKALQSPPTDRYASMKEFI-----
89898773     IYSLGLIAYELILGNLALGKVVLSLIPDRVSKILAKALQSPKDRYASMKEFLIDL----
3329124     VYSLALLAYELIMGQALGKVVVSLPSKISKILIQALQSPAARFSSMQEFAEALQDYL
              : * : * . * : * * * : * : * * * : * : * * * * * : * : * : * :
```

Cluster No. 49 multiple sequence alignment

CLUSTAL 2.0.10 multiple sequence alignment

```
4376355 -----MGEVYLAYDPVCSRKVALKKIREDLAENPLLKRRFLREARIAADLIHPG
8978468 -----MGEVYLAYDPVCSRKVALKKIREDLAENPLLKRRFLREARIAADLIHPG
8163479 YDIVRIIGKGGMGEVYLAYDPVCSRKVALKKIREDLAENPLLKRRFLREARIAADLIHPG
33241430 YDIVRIIGKGGMGEVYLAYDPVCSRKVALKKIREDLAENPLLKRRFLREARIAADLIHPG
29834784 YDIIRMIGKGGMGEVYLAYDPVCSRKVALKRIREDLSDNELLKRRFLREAKIAADLVHPG
29840435 YDIIRMIGKGGMGEVYLAYDPVCSRKVALKRIREDLSDNELLKRRFLREAKIAADLVHPG
89898141 -----IGKGGMGEVYLAYDPVCSRKVALKRIREDLSDNELLKRRFLREAKIAADLVHPG
3328716 YELIRLIGKGGMGEVYLAHDKACSRVALKRIREDLSGNALLRQRFLEAKIAADLIHPG
          *****:* .***:****:*****: * **.:*****:*****:***
```

```
4376355 VVPVYTIYSEKDPVYYTTPYIEGYTLKTLKSVWQKESLSKELAEKTSVGAFLSIFHKIC
8978468 VVPVYTIYSEKDPVYYTTPYIEGYTLKTLKSVWQKESLSKELAEKTSVGAFLSIFHKIC
8163479 VVPVYTIYSEKDPVYYTTPYIEGYTLKTLKSVWQKESLSKELAEKTSVGAFLSIFHKIC
33241430 VVPVYTIYSEKDPVYYTTPYIEGYTLKTLKSVWQKESLSKELAEKTSVGAFLSIFHKIC
29834784 VVPVFTICSDSDPVYYTTPYIEGYTLKSLKSVWQCDSLPKDLAEQTSVATFLSIFHKIC
29840435 VVPVFTICSDSDPVYYTTPYIEGYTLKSLKSVWQCDSLPKDLAEQTSVATFLSIFHKIC
89898141 VVPVFTICSDSDPVYYTTPYIEGYTLKSLKSVWQCDSLPKDLAEQTSVGTFLSIFHKIC
3328716 IVPVYSICSDGEAVYYTTPYIEGFSLKSLKSVWQKEVLSKELEEKTSVKSFLPIFDKIC
          :***:.* * : .*****:***:***** : *.* * :*** :*.**.***
```

```
4376355 CTIEYVHSRGILHRDLKPDNILLGLFSEAVILDWGAAVACGE-----EED-LLDIDVSKE
8978468 CTIEYVHSRGILHRDLKPDNILLGLFSEAVILDWGAAVACGE-----EED-LLDIDVSKE
8163479 CTIEYVHSRGILHRDLKPDNILLGLFSEAVILDWGAAVACGE-----EED-LLDIDVSKE
33241430 CTIEYVHSRGILHRDLKPDNILLGLFSEAVILDWGAAVACGE-----EED-LLDIDVSKE
29834784 STVEYVHSRGILHRDLKPDNILLGLFSEVILDWGAALSKEM-----EEDFLSDIDVRIP
29840435 STVEYVHSRGILHRDLKPDNILLGLFSEVILDWGAALSKEM-----EEDFLSDIDVRIP
89898141 STVEYVHSRGILHRDLKPDNILLGLFSEVILDWGAALSKEM-----QEEVLLDIDIPVT
3328716 ATVEYIHSKGVLRDLKPDNILLGLFGEVVIIDWGAALFKHAKELKLEQDDEAAVSFDER
          .*:***:***:*****:*****.***:*:*****:      :::      :..
```

```
4376355 EVLSSRMTIPGRIVGTPDYMAPERLLGHPASKSTDIYALGVVLYQMLTSLFPYRRKKGKK
8978468 EVLSSRMTIPGRIVGTPDYMAPERLLGHPASKSTDIYALGVVLYQMLTSLFPYRRKKGKK
8163479 EVLSSRMTIPGRIVGTPDYMAPERLLGHPASKSTDIYALGVVLYQMLTSLFPYRRKKGKK
33241430 EVLSSRMTIPGRIVGTPDYMAPERLLGHPASKSTDIYALGVVLYQMLTSLFPYRRKKGKK
29834784 GSLFSNMTIPGKIVGTPDYMAPERLRGTPASESTDIYALGVILYQMLTSLFPYRKKKGQK
29840435 GSLFSNMTIPGKIVGTPDYMAPERLRGTPASESTDIYALGVILYQMLTSLFPYRKKKGQK
89898141 GSMFSNMTIPGKIVGTPDYMAPERLRGTPASESTDIYALGVILYQMLTSLFPYRNKKGKK
3328716 NICYSSMTIPGKIVGTPDYMAPESLLGVEASEKTDIYALGLILYQMLTLAFPPYRRKKGRK
          * *****:***** * * **.:*****:*****:****.***:*
```

```
4376355 IVLDGQRIPSPQEVAPYREIPPFLSAVVMRMLAVDPQERYSSVTELKEDI
8978468 IVLDGQRIPSPQEVAPYREIPPFLSAVVMRMLAVDPQERYSSVTELKEDI
8163479 IVLDGQRIPSPQEVAPYREIPPFLSAVVMRMLAVDPQERYSSVTELKEDI
33241430 IVLDGQRIPSPQEVAPYREIPPFLSAVVMRMLAVDPQERYSSVTELKEDI
29834784 ISLR-HQISFPPEIAPHREIPPFLSQVVMRALAADPRERYRSVSALKADI
29840435 ISLR-HQISFPPEIAPHREIPPFLSQVVMRALAADPRERYRSVSALKADI
89898141 ISFR-HQISSPEIAPHREIPPFLSQVAMKALAADPKVRYASVKELKDDI
3328716 LSYR-DVVLPPPIEMSPYREIPPSLSQIAMKAIAINPADRFSSIQELRQAL
          :      . : * **.:***** ** .*: * : * * : * : * : *
```

Cluster No. 50 multiple sequence alignment

CLUSTAL 2.0.10 multiple sequence alignment

37520154 YRVVRELGRGGMGVVFLAERADGQFQKQVCIKVLQOTGWAAALQVGRFLSERQILANLEHP  
37523641 YRLVGELGRGGMGVVYLAERADGLFSKRVAIKVLQPGRGAPLLLERFVQERQILANLEHP  
37520484 YRIIRPVGQGGMGAVYLAERDDQFDKRAAVKILQPQLHGPGRLRERFIGERQILASLDHP  
116620747 YTIQALIGRGGMGAVYRAVREDD-FHLEVAIKLLKRGTDTDAAALARFRGERRILAALQHS  
116626655 YTIQALIGRGGMGAVYRAVREDD-FHLEVAIKLLKRGTDTDAAALARFRGERRILAALQHS  
116626939 YSIAGLIGRGGMGTVYRAEREDD-FHTQVALKVLKRGTDTEKALSRFRSERQILAGLQHP  
94971075 YRLVKEIGRGGMGSVFLAERDDEHFHQTVAIKIVKRGMDSAEVLARFRHERQILAGLEHP  
116622939 YRLVRTIGAGGMGTVFVAVREQD-YHKRVALKVAASAIGTPAWVERFKQERQILSGLDHP  
116620251 YRVLRQIGRGGMGVVYLGARADGEYQKQVAIKLITSGWRDAGLERRFRERQILAQLDHP  
85375834 YRLEGLIGSGMGSVYAARRDRGDFEHEVAIKLIKPLLSEQLTERFGRERQLLASFSHP  
21244844 WAIDRLIGAGGMQVYLGHRADGAYEREVAIKLVAADALDAQGRALFEFECRLLAQMVHP  
: : : \* \* \* \* \* : . \* : . . : \* \* : \* \* : \* .

37520154 YIARLIDGGSTEAGVPYLVMEFVDGMPIDRYCEAQQLGLRPRLELFSKVCQAVQYAHTCR  
37523641 HIARLIDGGTSEGLPYLVMEYIDGEPIDCYCRKQQLPVRERLALIEKVCRAVHHAHTLQ  
37520484 YITRLLDGGTTEQGLPYLVMDYVEGQPINLYCNERKLDVDERLRLFLKVC EAVHYAHAHR  
116620747 NIARLLDGGATEFGLPYLVMEYVHGTPLLEYAAT--LDTRRRLELFRSVC SAVQYAHQNL  
116626655 NIARLLDGGATEFGLPYLVMEYVHGTPLLEYAAT--LDTRRRLELFRSVC SAVQYAHQNL  
116626939 NIARLLDGGATGAGLPYFVMEYVEGAPLLEYAAP--LPVRERVKLFRSLCAAQYAHQNL  
94971075 YIARLIDGGTDDDGRPFVMEYVEGRPIDVYCREQNL SVEARLRLFVRVCEA ISYAHRAL  
116622939 NIARFLDGGASSDGLPYFAMELVEGEPITDFVIDRNCGLRERIELFRKVC AA VFAHQSL  
116620251 GIARLLDGGSTADGQPYFVMEYIEGLGLLEYCARHELDIKQRLTLFLAVCD AVGYAHQRL  
85375834 NIARLYDGGETDDGLPFIVMEKVEGIPLGDWIDQTRPSLPERLALFLKVC DAVSYAHGHL  
21244844 AIAQIHDVGTDAHGQPYLVMEYLRGEPITWWCDEHRLSLHARVLLMLRVGEAVQHAKG  
\* : : \* \* \* \* \* : \* : : \* : \* : \* : \* .

37520154 VIHRDLKPSNIVNCEG---EPRLLDFGIAKLLDPQ-GRSS--EPTRTDLRVLTPRYASP  
37523641 VLHRDLKASNILVDGAG---EPKLLDFGIAKLLDEQ-APEA--EQTATEWRMLTPSYASP  
37520484 VIHRDLK PANILIDPEG---NPRLLDFGIAKLLPADPEATA--VFSQSMTRLLTPGYASP  
116620747 IVHRDIKPSNIVTPEG---IPKLLDFGIAKLLGPGMDDFTG-AVTIAGERPMTDPYASP  
116626655 IVHRDIKPSNIVTPEG---IPKLLDFGIAKLLGPGMDDFTG-AVTIAGERPMTDPYASP  
116626939 IVHRDIKPSNIVNRDG---VPKLLDFGIAKLLDAAEADGT--ASTATGARPMTDPYASP  
94971075 VVHRDLKPSNIVTSEG---IPKLLDFGVAKLLGPSLDPGL--TSTWSAMGPLTPEYASP  
116622939 VVHRDLKPGNIVTAGG---EPKLLDFGLAKLQSP-IDPCE--GFTRTALPFLTPAYCSP  
116620251 IVHRDLKPGNIVTTEG---APRLDFGLARVLER--DAAS--EEATQGIPLMTPAYASP  
85375834 VVHRDLTPSNILVELTN---EPKLIDFGIAQPDGTERRDADGGAPLVRHLTLTPGYAAP  
21244844 VIHRDLKPSNVLVSEIDGRPMGPVIDFGIAV-----DATN--PGMTYAHDRGTPGYMSP  
: : \* \* \* : . \* : \* \* \* \* \* \* \* \* \* \*

37520154 EQIAGAE-LTPASDVYALGVVLYELITGQRPAGAQAAS YELAWT LSDQTALLPSRAVGE  
37523641 EQIRGEA-AGPSSDVFSLGVVLYELLTARRPAGLNVGPLDEMLWTLG EQAAVPPSRAVAA  
37520484 EQIKGEA-ITPASDEYSLAVVLCCELLSGRRPG-----EATPQQLTG-  
116620747 EQVRGEP-VTTATDIYSLGAVLYELLTGQRAHHIEAYSREAIEKEICAREPKPPSTITR-  
116626655 EQVRGEP-VTTATDIYSLGAVLYELLTGQRAHHIEAYSREAIEKEICAREPKPPSTITR-  
116626939 EQLRGEQ-VTTASDIYSLGAVLYELVTGRRARLA AKYTA AEIE-AICKSDPKRPGAVCA-  
94971075 EQIQGLP-ITTAADTYALGAILFELLTGRR AQKIAGHSPA EIERVVCHVEIPAPSAVEKT  
116622939 EQVLG EK-ITTRVDVYLLGLILFELLTGSQAHQLTGSSPAELQQIVSEEHTPVPSARATQ  
116620251 EQVRGEP-DAVPGDVYSLGVILYELLAGRRPYEVK TGS LLEMARAI CEQEPAPLSQGASG  
85375834 ERLRGET-ATTLSDIYSAGRLNFLV PKRPA-----  
21244844 EQARGAQD V DARS DIYALGAMFYELSCGLAPVAGRDGVPQPPSQRVA AVPADARARICAA  
\* : \* \* : . : \* .

37520154 QPTRAFAPAAAEGGAQGLSRQLEGALDRIVLRSLSKPLDRRYATV GELLTEVRRYL---

37523641 GTDAGLLADPQK-----VQIDGSIDPLVLCALAKAPADRYTSALAMAEAIRGYL---  
 37520484 -----KLAGPLASLVLKALCEDPLDRFGSVAAFSLAIERHL---  
 116620747 -----EVDSLNNITLLALRKEPQRRYGSVEQFSEDI-----  
 116626655 -----EVDSLNNITLLALRKEPQRRYGSVEQFSEDI-----  
 116626939 -----EVGPDLDNIIILMALRNEPERRYASVEQFAGDIDRFLQRL  
 94971075 SG-----LSLKIDSDLNIVLMALRKEPERRYRSVNQFAEDIAKYL---  
 116622939 AGNLA-----LAKSLRGDLKIVLKAIQKDPARRYQSVDEF-----  
 116620251 S-----LARRLVGDLENIAAKALAKDACRRYPSVGELAADLRRHL---  
 85375834 -----ELQAIANKATASETDDRYQSIEALAADVRRHL---  
 21244844 RATTYQK-----LHEQLRDGLDAIVLRALEPQPGARYASVSAL-----

: : : \* : :



Cluster No. 51 multiple sequence alignment

CLUSTAL 2.0.10 multiple sequence alignment

37519623 YRLGRLDGGSMGSVYEAADTKLAGKVVALKVMHRSLAGDT-EVVKLLRQRFEEEEARLSA  
37520234 YRLTRYIDGGMGKVYEAVDTRLGDKAVAVKLLQONLNVDD-RLFEQLRRRFEQEAQLCA  
86605092 YRLTHHISEGGYGNVFEAVDTQLNDEPVAVKLLRPPPDMEPEYYQQLQQRFLDEARVSA  
86607459 YQLVQSI AAGGMQVFKAVDTRLFNRPVAVKLLHQNLAGE-NTRRHLLKRFQOEIRIST  
86606900 YRLIQEIGGGMGSVFRALDLHNNHQEVAVKILHAPLLLSRGDAQIDLRRRFAEEIRISI  
\*: \* : \* . \* . \* : \* : . \* : \* : \* : \* : \* : \* : \* : \* : \*

37519623 ILGSHPRIIQVTDYGVGEPQPYLVMEELL-----KGRSLKEVL-AQGPMPPGRAVRLAVQL  
37520234 LLGGQHGI IAVSDYGLDGPQPYLVMEYLG AAP-RGRSLKELVSAEGPLSPERTVRLAVQI  
86605092 LLGEHPNIVQVRSYGLYQNPYLVMEYLKAKPYTGQGLDYVLAREGPLHPERVVNLALQI  
86607459 LLGEHPAIVKVL DYGLENNQPYLVMEYL-----TGRSLGELLKQPLPPQVVKIARQV  
86606900 LLGQHPRIVKVLDHGQEGEQAYLVMEYL-----KGQDLGKLMREK GALPLRQVIRLALQA  
: \* : \* : \* . : \* \* . \* \* \* \* \* \* \* \* \* \* \* \* \* \* \* \* \* \* \* \* \* \* \* \*

37519623 CDGLQHAHAAQATVEGRTIRGIIHRDIKPGNLF---LIEDESLGETVKILDFGI AKANS  
37520234 CESLQYAHGVRTHLGG RQITGVVHRDIKPSNIF---VIDRALVGETTKVLD FGI AKAVSD  
86605092 CSALHHAHNFHMDLGKHSIRGVIHRDIKPSNIF---VQKGPDKERVKLLDFGI SKLMGE  
86607459 CAGLYYAHNLETEQDGH LIKGVHRDIKPSNLF---VLKDET LGETVKILDFGI AKLLSD  
86606900 CEGLHFAHTFRAKVDGREIRGVIHRDIKPSNLFLEQV LQEQQLTSQKILDFGVAKTLAD  
\* . \* . \* \* . : \* \* : \* : \* \* \* \* \* \* \* \* \* \* \* \* \* \* \* \* \* \* \* \* \* \*

37519623 ISLALGTQAG--FVGTSGYASPEQLRGEALDARSDIYSLGVVLYQMLTGOMPLKPKTETF  
37520234 VTIAMGTNMG--FVGTCDYASPEQLRGEELDARSDIYSLGIVLYQMLTGQLPLQPKTHSF  
86605092 TSRGL-TQTGY-FLGTMVYASPEQMRGEKLDGRSDIYSLGVVLYELLTGALPFEPETDTL  
86607459 VSLALGTQTTG-FLGTVRYASPEQVRGEELDPRSDIYSFGVVLYRMLTGQHPLKPKTDSF  
86606900 HTLSLGTGTHKGGF IGTARYASPEQIRGKSLDARSDIYSFGVVLYEMLTGSMFPFRLETDSL  
: . : \* : \* : \* \* \* \* \* \* \* \* \* \* \* \* \* \* \* \* \* \* \* \* \* \* \* \* \* \* \* \* \*

37519623 AGWYHAHNYTTP TGFQAHRLPYMLPPALAAVVLSCLEKDPANRPQSMQMLGMQL  
37520234 AGWYQAHNHESPVPLPRLAVGQAI PPRVAAVVMACLEKEPARRPASMQELSQR  
86605092 QGWYHVHNFQKPRPFQDHPLPHIPEALEKVVLRCLEKDPALRPATMEELAQQ  
86607459 PGWYEAHNYQQPRPFDRSQLPHEIPPAL EEVVLAACLAKDPGRPPNMKLLSDQL  
86606900 HSWIHAHCYESPLEINPETTPQIPPALAAVVMDC LKKNPDERPQTMQELGERL  
. \* . \* . \* : \* : \* \* : \* \* \* \* \* \* \* \* \* \* \* \* \* \* \* \* \* \* \* \* \* \*

Cluster No. 52 multiple sequence alignment

CLUSTAL 2.0.10 multiple sequence alignment

15921045 YKVEKVI GTGGMGFVLLVEKNMKKFAMKVIKKEFRYDELLYEIAKMQEISKGSKYLVKIM  
70606963 YKVEKVI GSGMGYVLLVEKGMKRFAMKIVKKEFRYDEMLYEIAKLQEISKGSKYIVRIF  
13816645 YEVKQLLGNGMGYVLLVERNGKKYAMKVMKKEYTFIEMLYEVAKMQEISKRSEYLVKIF  
146303616 YEIRSVLGRGGMGYVLLAEKNGKQFAMKVMKKEYRMDEFLEYEVAKMQEISKGSRNMVRIL  
\*:.:.:.:.\* \*\*\*\*:\*:\*:\*:. :.:.:.:.\*:\*\*\*\*: \*:\*:\*:\*:\*:\*:\* \* . :\*:\*:

15921045 ASFVDENFSDYYSSPPAVVMEYMEGGDLREILVNQEYSTLRHSSKWPQIVSVIYSKLADA  
70606963 ASFVDENFTDYYSSPPAIVMEYMEGGDLRQIITNNEYSTLRHSSRWPEIVSIMFSKIADA  
13816645 ASFLDENWTDYFSSPPAIMEYMEGGDLRSILVDQEYSALRHSSVKWPQVVALIFSKIACA  
146303616 ANFIDENWTDYYGSPPAIVMEYMAGGDLRRILADEEYSSLRHSSVRWGEVVSIIYSQIADA  
\*.\*:\*:\*:\*:\*:\*:\*:\*:\*:\*:\*:\*:\*:\*:\*:\*:\*:\*:\*:\*:\*:\*:\*:\*:\*:\*:\*:\*:\*:\*:\*

15921045 I I H I H K N G Y V H C D I K P S N I L F N R K L P K Y G E E A L E A L L N E E V V P K L S D L G S A V K V G V P V I H  
70606963 I I H V N K N G Y V H C D I K P S N I L L N G K L P K Y G E Q A V Q A L L E E K I T P K I S D L G S S V K V G T P V I H  
13816645 V I E V H K E G Y T H C D I K P S N I L F N K K L P R Y G E D A L N S L L N F E V V P K L S D L G S S V K I G T P V M H  
146303616 V I H L H K Q G Y V H A D I K P S N I L F D R A L S K Y G E E A E Q Q L L K G D V I P R L S D F G S S I R V G S P V I H  
:\*:.:.:.\*:\*:\*:\*:\*:\*:\*:\*:\*:\*:\*:\*:\*:\*:\*:\*:\*:\*:\*:\*:\*:\*:\*:\*:\*:\*

15921045 YTPYYAHPLQRFGGKAEYNFDVYSFTVSLYVTLTNNFPFSEWLERELEEEAVTDPSKREIA  
70606963 YTPYYAHPLQRFGGRAEYNFDVYSLTISLYVALTNNFPFPEWLEREIEEAVIDPSKRENV  
13816645 YTPYYAHPLQRFGNRAETMFDVYSFVSLSLVSLTNNFPFPEWLENEIEEAVKNPEKRKQA  
146303616 YTPYYAHPKQRFGGKAETSMDVYSFVVSLSLVTLTNNFPFPEWLERELEEEAII SPEKRADA  
\*\*\*\*\* \*:\*:\*:\*:\*:\*:\*:\*:\*:\*:\*:\*:\*:\*:\*:\*:\*:\*:\*:\*:\*:\*:\*:\*:\*

15921045 LKDFYLAEPRLDQIPDEFRLDVERGLRGEITLEEMSREL-----  
70606963 IKDFYNMDPRLDYVPSEFHDILRGLRGEITIEGISRELKQITRTEYG  
13816645 LDDFHNATPRLDYVPAEFKDLITMGLKGEISMLEINKRL-----  
146303616 LKDFYSVEPRMDYVPQEFREIILSGLRGDPTMEQIRREL-----  
:.\*\*:\* \*:\*:\* \*:\*:\*:\*:\*:\*:\*:\*:\*:\*:\*:\*:\*:\*:\*:\*:\*

Cluster No. 53 multiple sequence alignment

CLUSTAL 2.0.10 multiple sequence alignment

```

116622793     YEILSLLGSGGMGEVYRARDQRLARTVALKVLPEFAADSIRRQRFEQEARAASALNHPN
116623625     YEIVAAIGAGGMGEVYRARDARLGREVAIKVLPEAFARDAERMLRFEQEARAVAALNHPN
94967294      YEIQSQLGAGGMGEVYRAKDLRLDRSVAIKVLPGHLSNPPELKERFVREARAISSLNHPR
94971144      YEIQSPLGAGGMGEVYRAKDLRLDRTVAVKILPGHLSDNPDAKQRFREARTISSLNHPN
94971417      YEIQSPLGAGGMGEVYRATDTRLDRIVAIAIKILPAHLSANPEARQRFEREARSISALNHPN
116622781     YRIDSKLGEAGGMGVVYRAFDTHLDRPVAIKLLRPDAIGSAERRRRFVQEAKSASALNHPG
116625466     YRIIGELGAGGMGIVYKAQDIRLERFLALKFLKPERVN-DDFRRRFLQEARASSALAHPS
116624547     YEIREKLGSGGMGSVYLAFDTRLNRSVALKILSIENWEGTDGASRLLEAQAASALNHPN
94969605      YQVDALLGKGGMGEVYTARDTRLQRTVAIKILPSHLSYNDLRARFEQEAKSISALQHPN
94970396      YRIVEKIGGGMGVVYKAEDTRLHRFVALKFLPDTVSTDPQALARFOREAQAASALNHPN
94971006      YRIVEKLGSGMGVVYKAEDTRLHRFIALKFLPDNVAADPQALARFOREAQAASALNHPN
94971419      YRITEKLGSGMGVVYKAEDTRLHRFVALKFLPELARDPQALARFOREAQAASALNHSN
94968483      YRIVERLGGGGMGVVYKAEDTRLHRFVALKFLPELARDSQALSRFQEARQAASALNHPN
94971143      YQIVEKIGGGMGVVYKAEDTRLHRFVALKFLPANVAGDAQALARFRREAQAASALNHPN
94971416      YRILEKLGSGMGVVYKAEDTRLHRFVALKFLPELARDPQALARFOREAQAASALNHPN
94968081      YRIVEQIGGGMGVVYKAEDTRLHRLVALKFLPEDVAEDTATLARFQREARAASALNHPN
116622913     YRIVGKLGSGMGVVYKAEDILLHRFVALKFLPEHIVHDARALARFQREARAASALNHSN
94967801      YVVAERLGGGGMGVVYKATDSSLRGRSVALKFLPDDISHDPQAIERFRREARAASALNHPN
94971418      YHILEKLGSGMGVVYKAEDTRLRRFVALKFLPDPVANDPQTLSRFQEARQAASALNHPN
94969422      YRVLEELGGGGMGVVYKAEDSKLGRVALKFLPADVTPDRGTLERFQREARASAALNHPN
94970962      YVVSRLKLGSGMGVVYQAEDTTLGRHVALKFLPDSLADSHALERFQREARASSALNHPN
94970115      YQVLEEIGSGMGVVYKAQDTRLGRFVALKFLPEEFANNPEVLARFRREAQAASSALNDPN
* :      * : * * * * * * * * * : * : * * * * * * * * * * * : * * * : * * * * * .

116622793     ILSVFDMG----SQDGLVYIVSELIEGESLRDLIRRG-PLPQSRAVEIAGQVADALAAAH
116623625     VLSVFDIG----TQDGVPYLVSELLEGESLRDVLRTG-PITSRKAVEYARQIADGLAAAH
94967294      ICTLHDVG----QQEGVDFLVMFLEGEESLAQRLOKG-ALPIKEVLKI GVEVSEALEVAH
94971144      ICTLYDVG----QQEGTDFLVMFLEGETLADRLRKG-PMPIAQLLKCAIEVCDGLDRAH
94971417      ICALYDIG----TQDGTDFLVMFLEGETLEARRQKG-PLPLKQVTEIGIQVCDALEKAH
116622781     I IHIYDIDKAILPEGPVDFIAMEFVPGRTLEQCIGKV-GLSLKDTLKFGIQVADALARAH
116625466     I IHIYDIG---VFDG-MDYIAMEFVEGRSLRDVLRDA-RLSVEDTVKFGIQIADAMSMAH
116624547     I ITIYEVG----REHEIDFIAMEHISGKTLAK-LATR-RLSPRELIPLLIQIADALAAAH
94969605      ICVIHDVG----SQDDIEFMVMEYVQGD TLDKLI PKG-GLPAEIAIRYAIQIADAIGCAH
94970396      ICTIYDIG----EENGKAFIAMEYLDGQTLKHRVDNR-PLAMDELLPIAIDVADALDAAH
94971006      ICTIHDIG----EENGKAFIAMEYLDGVTLKHLIEGR-PLDMERLLPIAIDVADALDAAH
94971419      ICTIYDIG----EDNGQAFIAMEYLDGVTLKHRIEGR-ALDLEVLLPIAIEIADALDAAH
94968483      ICTIHDIG----EENGRAF IAMEFLDGLTLKHTIEER-SMEMDRILALAEIADALDAAH
94971143      ICTIYDIG----EENGQAFIAMEFLDGM TLKHKASGL-AMDMDTILPFAIEIADALDAAH
94971416      ICTIYDIG----DDNGQGF IAMEFLEGMTLKHRIINSQ-PVDLETVLT LAIDIADALDAAH
94968081      ICSIFDIG----EQEGRAF IAMEYLDGVTLKHLIGRS-PVEMSKLLGLAIEIADALDAAH
116622913     ICTIHEVT----EYNHQPVIVMELLEGD TLRERIRGG-ALPLEEILNLAVQATDALDAAH
94967801      ICTIYDIG----EYEGRPFIAMELLEGQTLKHRIGTR-PMDITEILDAGIQIANGLDAAH
94971418      ICTIYDVG----EDDGRVFIAMEYLEGFTLKH LIEGT-PLKTAQFLDLGIQIADALDAAH
94969422      ICTIHEIG----EHQGRPFIVMELMEGATLKH LIAGR-PMRMDRMLLELGIQISDALDAAH
94970962      ICTVYAIE----QHERQHFIVMELLEGS LAAMIGKS-AFEIEQLLALAIQIADALESAH
94970115      ICTVHDIV----DYEGRTFIVMEYLEGANVRERIKERGPFAIEEFFRI AISITEGLADAH
:   :   :           :   *   :   *   :   :           .           .   :   :   **

116622793     AANIVHRDLKPENIMLTRDGRAKILDFGLAKQ--VQPRVPGSDET--QFLTRTS-----
116623625     EKKIVHRDLKPENLFLSGGGRLKILDFGLAKMPVTE SAAAGVDAATATIVAVTS-----
94967294      RAGIVHRDLKPGNIMLTKTG-AKLMDFGLAKAVESTMAAGTSSAPLLSGAPTMSG---LS
94971144      RSGVVHRDLKPGNIMLTGKG-AKLMDFGLAKAAVASASAVSSLSMTLS-TPAQS-----
94971417      RAGI IHRDLKPGNIMLTASG-AKLLDFGLAKAVGVLGAQAATAGTHTPDTPTMNVSALRA
116622781     AAGIVHRDLKPANIIVSDDGRVKLLDFGLAKLTEKIDGDPDGVTATMG----TG-----

```

116625466 AAGIVHRDLKPGNLMITPARLVKILDFGLAKVANPNTTSVMSVSAESTNSVTTL-----  
116624547 TAGIVHRDLKPSNIMVTDRLVKVLDVDFGIKIK-----PGGNPADDP-----  
94969605 SAGIVHRDLKPSNVIVDKSGLVKVLDVDFGLAKTS----ALAAQAGAMET-----  
94970396 TAGIVHRDIKPANIFVTKRGAAKVLDVDFGLAKVSGRNPSSSQIASANTMTMA-AED-----  
94971006 AVGVVHRDIKPANIFVTKRGHAKILDFGLAMVSPRSESATVIASANTMSAA-IAK-----  
94971419 AAGIVHRDIKPANIFITKREHAKILDFGLAKVEVLAST-----SAATMTAG-VDE-----  
94968483 AAGIVHRDIKPANIFVTKRGHAKVLDVDFGLAKVENVAGSQTAIASANTMTAAGVQE-----  
94971143 TAGIVHRDIKPANLFLTKRGHAKVLDVDFGLAKVGGAAAASATSKPADNTISV-VRD-----  
94971416 SKGIVHRDIKPANIFVIERGHAKVLDVDFGLAKVTPRSASSVPSANTMTATELAVED-----  
94968081 TQGVHRDIKPPNIFVTKRGHAKILDFGLAKMSQEQETES---RLVAVTSDGLTG-----  
116622913 EKGIVHRDVKPANIFVSKRGHLKMLDFGLAKVDSPLAS-----TETDAPTATIE-----  
94967801 TKSIVHRDIKPANIFLVEPGEAKILDFGLAKVTLKNAVSA-AETMATMPAPVVSE-----  
94971418 SAGIVHRDIKPANIFVTPRGQAKVLDVDFGLAKLGQVASRGG-ASDVTVGNSAVVGT-----  
94969422 AKGITHRDIKPANIFVTNHGQAKILDFGLAKLDGRGIRSR-AAAGADLG-VTISE-----  
94970962 AKGIVHRDIKPANIFVTPRGQVKILDFGLAKMELLKPSVG--VATVSQMETVQQR-----  
94970115 RHGILHRDIKPANIFITDRGRVKILDFGLAKMGIQQLG-----TNTGDDD-----

: \*\*\*:\*\* \*::: \*::\*\*\*:\*

116622793 -----PGAILGTAGYMSPEQVRGEPVDPRSDIFSFGLVLYECLSGRAPFERQTGAEMM  
116623625 -----PGVVMGTTGYMAPEQVRGDAVDHRADIFSFGLVLYECLSGRAFQGDSSIETL  
94967294 PLSPLTMAGAVVGTVOYMAPEQVEGKLADARSDIFALGATLYEAATGKRAFQDGKSQIAVA  
94971144 --HPLTAEGTVVGTFOYMAPEQVEGREADARSDIFSLGAVLYEMATGKRAFEGKSAASTM  
94971417 PAAGLTQOGTIVGTFOYMAPEAAEGLATDARSDIFSLGCVLYEMVTGRRAFEGKSQLSVL  
116622781 -ESPETDEGTIVGTVAIYMSPEQAEGRKVDGRSDIFSFGLVLYECLSGRAFEGINKISTL  
116625466 -TAEQTQFGSALGSPAYMSPEQATGKLVDRSDIFAFGAMLYEMLAGQRAFTGDATIEVI  
116624547 -TQITITQLGQVHGTVAIYMSPEQAEGREVDHRSDIFSFGLVLYECLSGRAFADTGLATL  
94969605 -ITVGTSPGTIVGTVAIYMSPEQAEGKAVDTRSDVFSFGAVFYEMLSGHRAFEGESSAALL  
94970396 --PHLTSPGSTLGTVAIYMSPEQARAKELDARSDLFSFGSVIYEMATGQLPFRGDSTASIF  
94971006 --EQLTSPGSTLGTVAIYMSPEQARAKELDARTDLFSFGAVLYEMATGTLPFRGDSTATIF  
94971419 --KQLTSPGSTLGTVAIYMSPEQARAKELDARTDLFSFGAVLYEMATGQLAFRGDSTATVF  
94968483 --QHLTSPGSTLGTVAIYMSPEQARAKDLARTDLFSFGAVLYEMATGTLPFRGGSTAEVF  
94971143 --EDLTSPGSTLGTVAIYMSPEQAAKDLARTDLFSFGVLYEIATGRLPFPGESTGLIF  
94971416 --EHLTSPGSTLGTVAIYMSPEQAKGKELDARSDLFSFGSVLYEMVTGALPFOGETSALMF  
94968081 --EHRTSPGTTMGTVAIYMSPEQARGKELDARTDLFSFGVLYEMSTGTLPFRGESSVETF  
116622913 --ERLTDTGSTMGTAWYMSPEQVRAKELDGRDLDLFSFGVLYEMATGTLPFRGESSQGVVF  
94967801 --DQLTSPGSSLGTVAIYMSPEQARGEELDARSDLFSFGVLYEMATGQLPFAAATAALMF  
94971418 --DQLTSPGSTIGTIGYMSPEQARGEVLDRSDLFSFGVLYEMATGQOPFSGATSAVVF  
94969422 --DDLTPSGATLGTVAIYMSPEQARGETLDARTDLFSFGAVIYEMTSGNIPFSGNTTAVIF  
94970962 --DDLTIPTALGTVAIYMSPEQARGQFTDRTDLFSGLTVLYQMGTGVLFPQGDTTAVVY  
94970115 --DATKTRGWAFGTVAIYMSPEQALGKPLDQRSDIFSLGTVFFEMLAGITPFEGETTGTVF

\* \* : \*\*:\*\* . . \* \* : \* : \* : \* : \* : \* : \* : \*

116622793 TAILREDPPELPET--VFPALRQIVHHCLEKDAVRRFHSANDLAFALRTV-----  
116623625 NAILKEDPPEFDSEKLVSPGLERIVRHCKLEKRPGERFQSARDLTFALSALSDPSG  
94967294 NSILEKDPEPASTLNPQVPRGVDHVIARCLAKDPEQRWQTARDLGLLEL-----  
94971144 AAILERDPAPISTIQPTTPPALERLVKTCLAKDPDERWQTAHDVKLQQL-----  
94971417 TAILERDPEPISTIQPLTPLALEYTVHTCLEKNPDQRFQTAHDVKLQQLVWI-----  
116622781 SAILHKEPKAASEISQAVPVELEKIIARCLRKDLERRAOGIADI-----  
116625466 SAVLRHDPPVPSASNSNAGPELDAVVMKCLKKSPPHRYQSMEEVKLAL-----  
116624547 AAVVAKDPRPVELVLDLPRSVRILENCLRKRNRDRWQSIEDVKLVLEAALADL-  
94969605 ASVLRDEPKPLTEVRRDLDEIRRIIVTRCLKDKPAARYADGNDLARDLKRCRETL-  
94970396 DAILNRQPTAPVRLNPDIPAELERINKALEKDRDLRYQVASEMRADL-----  
94971006 DAILNRAPVAPVRLNPDLPKLEDIINKALEKDRNLRYQSAEMRADL-----  
94971419 EAILNRAPVPPVRLNPDLPKLEDIINKALEKDRNLRYQHAADIRADL-----  
94968483 KAILDAPTTPMVRMNPDPPELERIVSKALEKDRNLRYQSANDMRADL-----  
94971143 KAILDNAPEPMTKLNPAIPAEFERVVFKALEKDRDLRYQSAEELRADL-----  
94971416 DAILNRDPLPPLRFNPKVPKLEEIIQKALEKDRDLRYQHASEMRSDL-----  
94968081 EAILGRVPVAPVRLNPDVPHELERIISKALEKDRNLRYQSAEMQADL-----  
116622913 DAILNQTPVPPVRLNPDLPALERIIAKCLEKDRNLRYQHASEIRSDL-----  
94967801 DGILHSEPKSASEVNHRIPLAFDTLLNKAMEKDRDLRCQSAEELRADL-----  
94971418 EAILNKVPTPANDVNPTVPKQIEEVLKALEKDRDLRYQSAEELRADL-----  
94969422 NNILNISPKPLPQSIQVPLELDRIVSKALEKDRDLRYQTAELRGDL-----  
94970962 EAILNRDPVPAEVNGLPQAFARIVEKALEKDRDLRYQTANDIKTDL-----  
94970115 LAVVQNTPVIPVQEIPTNPAGLKRIVSKALEKDRDLRYQSAEELRDDL-----

:: \* . : : \* \* ::

Cluster No. 54 multiple sequence alignment

CLUSTAL 2.0.10 multiple sequence alignment

1653478 YQTLGLLGKGGFATFAADVA-LPGTPICVVKQLRPQTDDPNV-FRMAKELFEREAQTL  
22299083 YRILSQLGQGGFGRITFLAADLH-LPDHPICVVKQLVPSRKDERF-LAIARRLFQREAEITL  
113477484 YKIIKIIIESEGLAHTYLAQDIR-RPGAAECFIKHLQPSISDQKF-LEIIRRRFQOEAOIL  
113478146 YRVVQILNSGAFGQTYLAADTR-RPGHPQCVMKVLRL--TPSNL-LKTAHRLFKQEAAIL  
17132866 YQIVQNLGSGVFGQTYIAVDIN-YPHQPKCVVKQLKVNFSHSS-LDTIRLRLFTETETL  
113476415 YKVIKSLGTGGFGYTYLAEDLD-LPGYKPKVVKHLKPKSPDSTV-LNIARKLFLREADIL  
113476417 YKIIKSINNGGFGDITYLAQDID-LPGYKPKVVKHLKPKNLDPV-LNVARKLFEREADTL  
113474333 YKIIKPLGSGGFGDITYLAQDSD-LPGKPKCVVKHLSPKSSDPMV-LSIARKLFEREAEAL  
113476216 YEIIKTLTAGSFGQTYIAINKHSQPPNQEVVIKLLKPKQNDPYT-LQNAERLFKKEVESL  
113475689 YQGIKPIGNGSFGRTLLAVDLD--RFNTPCVVKQLAPKNNLLS-NNKVLLELFKREAKQL  
1653955 YRIIETLGRGGFGETFLAQDTH-MPSARKCVIKHLKPVLENPEIPSWLRER-FHREAAATL  
1006577 YEIVKSLGSGGFGDTFLAKDTQ-IPSQKLVVVKRLKPANANSNTSTELIQKLFKEASVL  
\* . : : . \* \* : . : \* \* \* \* . \* . \*

1653478 GRVG-NHPQVPRLLDYFEDDHQFYLVQYEVVKGHNHLEEVKNG----TFTEGSVKQFLTE  
22299083 AQLG-QHQRIPRLLAYFEEGGYFYLTQYEVVDGESLKEEFEKKI----TLSQGEAIAILKS  
113477484 EKLS-QNNQIPKLLAYFEENQEFYLVQSFIPGKSLDNEILPGR----ALSEIQIIRILIE  
113478146 EKLK-RHSQIPLLLAYFEENNQFYLVVEEFIYGTPLEKEIIPGK----PWSEKQVIKLLLE  
17132866 KHLG-QHPQIPNFIACFEENERFYLVQYIIGGHALTAELPIAQNWGSVWREDEVITFLED  
113476415 YKLGNDSDQIPRLFAYFQEQREFYLVQYIEGQDISRELTGPK----KLSESDTIALLLK  
113476417 YKLGNDSDQIPKLLAHFQEQREFYLVQYIEGQDISRELTGPK----KLSESDTIALLLK  
113474333 YRLGTDSDQVPKLLAHFQEEKEFYLVQYIEGQDISRELTGPK----KLSESDTIALLLK  
113476216 KKLK-YHKQIPTFYAYFEENNEFYLVQYIIGKDLTEELKPGN----KLSESEVIHLLID  
113475689 LKLK-KHPQIPTFYAYFEEDENLYLVEELITGKNLLQELESEG----AFSEKKIWKILYE  
1653955 EELGENHPQIPQLYAYFSEGEDFYLVQEWIPGLTLTQAHAQKQ----NFSSTAVEELLG  
1006577 EDLGEHNSQIPKLYSYFSDNEFYLVQYIIGVSLNEIAP-----ISSEQAKTILSS  
. . : : \* \* . : : \* \* . : : \* . : \*

1653478 ILPILDYIHSQKVIHRDIKPANLIRRO-----TDQKLVLDIDFGAVKNQIDSVLSS  
22299083 ILEILQYVHQFGVHRDIKANIIRRR-----SDQQLFLIDFGAVR-----HVQP  
113477484 VLEILVHVHRNVIHRDIKPANLIRRK-----LDNKLVLIDFGAIK---EIN--I  
113478146 ILEILGFVHRYEVIHRDVNSNLIRRO-----LDRKLVLDIDFGSIK---EMSHQI  
17132866 ALSILQFVHSQGVHICDVKPENLIRRA-----VNGKLVLDIDFGSIQ---SVNFGI  
113476415 ILEALTVAHQNNVIHRDIKPNLMRRR-----SDNKIVLDIDFGAVK---EIDVLT  
113476417 ILEALTVAHQNNVIHRDIKPNLMRRR-----SDNKIVLDIDFGAVK---EIDVLS  
113474333 ILEALVVAHENNIHRDIKPNLMRRG-----SDNKVILIDFGAVK---EISILT  
113476216 ILEVLDVHKNQVIHRDIKPSNLMRRT-----EDNQIVLDIDFGAVK---EVGTVL  
113475689 ILPLLLKFIHENKVIHRDIKPENILRVDGVNSLVGENQKQDLVLIDFGVSK---FSSEVD  
1653955 ILPVLEFIHQRRIIHRDIKPDNIILRE-----ADGKPIIDIDFGI IK---ETMGTL  
1006577 LLTTLKYIHSKGIHRDIKPENIILRD-----SDHLPVLIDFGAVK---ETMGAV  
\* \* \* : : \* \* : : \* : : . . \* \* \* \* :

1653478 N TSAQTALTAFAVGTAGFAPPEQMAM-RPVYASDIYATGVTCLYLLTGKTP-----KEID  
22299083 EDLLRHGKYTISIGTRGYAPSEQMAG-RPVIASDIYSLGMVIVEGLTGLAP-----MDLP  
113477484 AQPS----RTARIGTMEYMPIEQFQY-NPQLNSDIYALGMMGIQGITGLPSSSELSKLYQ  
113478146 AQENGARQRTIATGTPSYMPIEQFQY-IPQYNSDIYAVGMIGIQALTGIPSGELPKLQDM  
17132866 DEQVS--IYQVPATSLGYIPPEQFQY-KTQINSDIYALGMIAIQALTGLEP-----LQLK  
113476415 INQQGATTLTVAVGTPGYMPSEQSNG-KPKLSSDIYAVGMVIGIRALTGKPE-----QSL  
113476417 TDQNGQITLTVAVGTPGYMPSEQSNG-KPKLSSDIYAVGMVIGIRALTGKPK-----QSL  
113474333 IAPQGATTLTVAVGTPGYIPSEQSNG-KPKLSSDIYAVGMVIGIKALTGKDP-----QSLP  
113476216 VNQQGQKTITVIIGTPGYMAGEQGG-HPECASDVYAVGKIAIQALMGVSPNLLAPNLLL  
113475689 YDKIG-----TITGTLGYSPIEQIRGGKAYPASDLYSLGMTCIHLLETVPP-----NQL  
1653955 VNPDGRSAYSVALGTPGYMASEQAAG-RPVFSSDLYSLGLTAIFLLTGKTP-----QYLT  
1006577 TLGSGSTVSSVIGTRGFMAPEQSSG-RSVFSTDLYALGLTIYTLTKKLP-----VEFS  
: : . \* \* . : : \* \* : : .

1653478 CNSQTGEMDWE-----KHVTVSSKFAEVIRKMLELSVRHRYKSAQQVLDAL-----  
22299083 SDPDSGDLIWQ-----PGRHLSPOFVAIINKMIKYNFRDRYQSAREVLTDL-----  
113477484 ENGNKKEIFWR-----NRINCSTALADVLDKMVRYNYRERYQSATEVIEDL-----  
113478146 SKSNSGILWR-----SQAQCSSNLADILEKMHCHYAQRYQSIKVVVI-----  
17132866 IDPDSNEIIWRF-----ADTPVSDYLAAILSQMIRYNFQERFQSAAEVLRLV-----  
113476415 TDPKTGNVIWR-----NEAQVSNRLADILDKMVHEYFPQRYENAMEVLDV-----  
113476417 TDPKTGNVIWR-----NEAQVSNHLANILDKMVHEYFPQRYENAMEVLDVLLGAKGKINP  
113474333 TDPNTGNI IWR-----NEAEVSNDLANVLD RMVDRHFSERYKNAMETM-----  
113476216 RNQNNPELLWR-----QGVLSIQELGNIIDKMVEQNCLLRYHNAGEALQEI-----  
113475689 FDSFSGELIWRSHLIKKGKNISDRLGKILDKLVKDLVKERYQSATEVLI EI-----  
1653955 SDSRTGEILWRQ-----GAPQVSPTLAKVIDQAVRYHPRERFNSATAMAQTL-----  
1006577 SDQQTGQLDWQS-----HVSKIDSVLAKVINKAIEMEPSRRYSSAEAMYQAL-----

. . : \*. . : :: : .. \*: .

1653478 -----  
22299083 -----  
113477484 -----  
113478146 -----  
17132866 -----  
113476415 -----  
113476417 PKPKQRPTAKTTV  
113474333 -----  
113476216 -----  
113475689 -----  
1653955 -----  
1006577 -----

Cluster No. 55 multiple sequence alignment

CLUSTAL 2.0.10 multiple sequence alignment

```

116333600      YRIVRALGEGGMANVYLAR-DLILNR-DVSVKLLRLDLR--DDPG--TIRRFQREALAAT
116492599      YKIIRPLGEGGMANVYLAH-DLILDR-DVAVKLVRFDMQ--DDVS--AIKRFQREALSTT
116618605      YRIIKSLGDGGMANVYLAH-DEFLNR-DVTFKMMRLDMK--NDVD--LAKRFQREALSVT
13622698       YRILKSIGRGGMADVLAN-DLILDNEDVAIKVLRTNYQ--TDQV--AVARFQREARAMA
28895405       YRILKSIGRGGMADVLAN-DLILDNEDVAIKVLRTNYQ--TDQV--AVARFQREARAMA
19551291       YELDAVIGSGGMSEVFAAT-DTLIGR-EVAVKMLRIDLA--KDPN--FRERFRREAQNSG
23491868       YELGASIGSGGMSEVFAAT-DLLIGR-EVAVKMLRTDLA--KDVN--FRERFRREAQNSG
68535099       YRLGAKIGTGGMSDVYAAT-DELLGR-DVAVKMMRPDLA--RDTT--FLERFRREAQNAA
116668588      YELGELIGRGGMADVHRGL-DTRLGR-TVAIKLLRPDLA--RDPO--FQARFKREAQAVA
29830914       YQLRDLLGEGGMASVHLAY-DSVLDL-QVAIKTLHTELG--REQA--FRERFRREAQNSVA
83646939       YKAQRELGRGAMGVVYQCF-DPDFER-IVAVKVLPELLG-ADVTGEFRERFRNEMRAAG
124265262      YVVERDIGHGAMGAVLLCR-DERTGE-AVALKTMALGREFHGDALDARERFFREAQMAG
116622546      YTITGLIGHGGMGSVYRATRVDFFRM-QVAIKLLKRGTD--TDLA---LGRFRAERQILA
32473469       YRVVRRIGSGGFGSVFHAK-DESLNR-DVAIKVPLRSLD---DVN--DEFQWSSEARMVA
29833662       YLLNRLGSGGMGHVWLAH-DQRLACEVALKEIVFRSPAEGQERTARVARARAEARHAA
*           :* *:. *           .           :           :           *

```

```

116333600      ELV-SPNIVQVYDVG-----EENG--MQYLVMEYVEGT----DLKAYIKQHFPPIPYQE
116492599      ELV-HPNIVGVYDIG-----EEHG--MNYLIMEYVEGQ----NLKQYIRDQFPPIPLGQ
116618605      ELI-NDNIVQVYDVG-----EYQG--SQYIVMEYVDGT----NLKSYIGEHPPIAYQQ
13622698       ELN-HPNIVAIRDIG-----EEDG--QOFLVMEYVDGA----DLKRYIQNHAPLSNNE
28895405       ELN-HPNIVAIRDIG-----EEDG--QOFLVMEYVDGA----DLKRYIQNHAPLSNNE
19551291       RLS-HSSIVAVFDTG-----EVDKDGTSVPYIVMERVQGR----NLREVVTEGDGVFTPVE
23491868       KLS-HPSIVAVFDTG-----EVDKDGTSVPYIVMERVHGR----DLRDIVREDGYPYSPSQ
68535099       KLN-HPAIVAVYDTG-----QTPDEDGAVPYIVMERVHGE----TLRDI IQDSGKMSLND
116668588      ALN-HPSIVAIYDTGDHAVPGGPEDTVRVPYIVMEFVSGK----TLRDLIR-AKEVSI DH
29830914       KLT-HTNIVSVFDTG-----EDSLDGLTPYIVMEYIEGKPLGSLVDADIQQHGAMPADK
83646939       KIS-HPNVINVFDTG-----DQDG--APYFVMEYVEGY----ELKSALDDGQRFPIDK
124265262      RLQ-HPDIVSVREAG-----EQDG--TAYIAMELLSGR----DLSEFTQPGRLLPVPA
116622546      RLQ-HPNIARLLDGG-----ANGTGSYPYFVMEYVEGL-----PFLQFVAPLSLRS
32473469       KLD-HPNIVPVYDVG-----KSDQFPFFVVSRLFQGV----DLRERILK GKPS-LEE
29833662       GLRGHPHVVTVHDVL-----EHEG--LPWIVMEYVAGA---LDLRLVRRRGPLAPAE
:           :           :           :           :           :           :

```

```

116333600      VIQIMEQILSAVKTAEHNI IHRDLKPNILID-----RNQVAKITDFGIAVAALSEH--
116492599      VVSLMSQILNGVQTAHYHGI IHRDLKPNILID-----KHGKAKITDFGIAIANQOS--
116618605      VVDIMMQLNAVQAAHNAGI IHRDLKPNILID-----RNDQVKITDFGIAIAKSEQ--
13622698       VVRIMEEVLSAMTLAHQKGI VHRDLKPNILLT-----KEGVVKVTDGFI AVAFAET--
28895405       VVRIMEEVLSAMTLAHQKGI VHRDLKPNILLT-----KEGVVKVTDGFI AVAFAET--
19551291       AANILIPVCEALQASHDAGI IHRDVKPANIMIT-----NTGGVKVMDFGIARAVNDS--
23491868       AATIMIPVCHALQSSHEAGI IHRDVKPANIMIN-----NTGGVKVMDFGIARALDDS--
68535099       AAAVMSQVCSALFFSHEAGI IHRDIKPANVMIT-----NTGAVKVMDFGIARALSDS--
116668588      AIDFTLGVLSALEYSHRAGI VHRDIKPANVMFCE-----DSDTIKVMDFGIARAMADS--
29830914       ALKITADVLAAL EISHEMGLVHRDIKPGNMMT-----KRNVVKVMDFGIARAMQSG--
83646939       TLKIMTDVLSGLGHIHEHGI IHRDLKPANIFIT-----KNGVAKIADFGVAKLE-----
124265262      VLGI IARVAQALAYAHRQGVTHRDIKPANIMVEL-----KSGMVKVTDGFIARIID----
116622546      RLELFRSVCSAVQYAHRNLI VHRDIKPGNILVT-----PEGIPKLLDFGI AKLLDPTSD
32473469       GLIW TASIADALDHANSGLVHRDVKPSNILID-----TQDRAWLTDGFI GLAMSDDAP--
29833662       CARIGLAVLDALTAGHERGIMHRDVKPANILLAPDR TGAAYARVLLTDYGISVQPDAG--
:           :           :           :           :           :           :

```

```

116333600      ----NLTQTNTVLG SVHYLSPEQARGG--MVTKQSDIYSLGI ILYELLTGT--VPFEGET
116492599      ----SFRTRNTVIGSVQYLSPEQVRGH--IATQOSDIYSLGI ILFEMLTGK--VPFEGES

```

116618605 ----DLTQHTVIGSVHYLSPEQTRGG--MASAKSDIYALGVMLYEMLTQ--VPYEGDT  
13622698 ----SLTQTNMGLSVHYLSPEQARG--KATIOQSDIYAMGIMLFEMLTGH--IPYDGDS  
28895405 ----SLTQTNMGLSVHYLSPEQARG--KATIOQSDIYAMGIMLFEMLTGH--IPYDGDS  
19551291 --TSAMTQTSAVIGTAQYLSPEQARGK--PADARSDIYATGCVMYELVTGK--PPFEGES  
23491868 --TSAMTQTAAVIGTAQYLSPEQARGK--PADARSDVYAAGCVLYELVTGR--PPFEGES  
68535099 --SSAMTQTAAVIGTAQYLSPEQARGQ--SADARSDIYAAGCVFYELATGK--APFHGES  
116668588 --SATMTQTQAVVGTAQYLSPEQARGE--TVDARSDLYSAACLLYEMLTGR--PPFIGDS  
29830914 --VTSMTQTGMVVGTPQYLSPEQALGR--GVDARSDLYSVGIMLFQLVTGR--LPFEADS  
83646939 --SSELTRVGTIIGSPRYMSPEQCQGL--PVDARSDLFAAGIFYQLLTNE--HCFNANS  
124265262 ---STQTRTGIVLGTSPFMSPEQMAGA--RVDGRSDLYALGVTLFQLLTGV--LPHRPES  
116622546 GGTAAYTATGARLMTDPDYASPEQVRGE--PVTTATDVYSLGAVLYELLTGRRAHKFESYS  
32473469 ----RPTRAGLLIGTYSYMSPEQARGEHLVDGRADIFALGIVLYELLVGR--RPFGGGS  
29833662 --ETRYTLTSALVGTGPGYLAPERATGG--PPTATADLFLSLGCTLYFGVEGCG--PFERDT

\* . : : : : \* : \* : : . : :

116333600 AVSIVLKHQFQSEIPSVRDL-----PRIPQALENVVLKATAKRPSDRYTDLSMADDLRT  
116492599 AVSIAVKHYQDQLPLVKDFN-----TKIPQSLENVVLKATAKNPIDRYKNVAEMAADLKT  
116618605 PVAVALKHATDDMPVSRDFD-----PRIPQALENVILKATAKNPQDRYLDVSVMAEDLKT  
13622698 AVTIALQHFQKPLPSII EEN-----HNVPQALENVVIRATAKKLSDRYGSTFEMSRDLMT  
28895405 AVTIALQHFQKPLPSII EEN-----HNVPQALENVVIRATAKKLSDRYGSTFEMSRDLMT  
19551291 PFAVAYQHVEDPTPPSDFI--ADLTPTS AVNVDVAVLTAMAKHPADRYQTASEMAADL--  
23491868 PFAVAYQHVEEPTPPSEYI--SDLSPTAALNVDVAVLTAMAKHPADRYQTAAEMAADLEL  
68535099 PLSVAFQHVENPEAPSQVLGMHLSKREALSLDSITLTAMAKSPSDRYDDAQEMATDL--  
116668588 PVSVAHQHVREIPEPASSLN-----PEVSEALDSVLSKALQKNRDRFQDAAAFQORAL--  
29830914 PLAIAYAHVQEEPVPASSVN-----RSLPPAVDALVARALKKNPNERFP SAEIMRDECL--  
83646939 PTAIMQKILHAKPELPSMLI-----PTLSKYYD VVVKALEKSPEKRYQSAEEFIQAL--  
124265262 MAELIRSIANDVAPDVRTL-----PELPAALADIVALALEKRPEIRYADGEAMAADLHA  
116622546 PVEVEKEVCEREPTIPSAVA-----RHLDPDLNIVLMALRKEPLRRYSSVEQFSEDI--  
32473469 SQQLLQDIVRAEPTPLRQFN-----PQLPIELERICLKALQRVSDRYSNAAAAMAADL--  
29833662 HLAEVTAVVLEEPRPPVRAG-----ALEPVLAAMLAKDPGQRITAEDETEAALSAI

: : \*

116333600 AL-----  
116492599 VLQPERANESKFV-  
116618605 V-----  
13622698 AL-----  
28895405 AL-----  
19551291 -----  
23491868 LSRNAVSRAARAHV  
68535099 -----  
116668588 -----  
29830914 -----  
83646939 -----  
124265262 VL-----  
116622546 -----  
32473469 -----  
29833662 -----



Cluster No. 56 multiple sequence alignment

CLUSTAL 2.0.10 multiple sequence alignment

```
146303114      YDVESILGIGGTSYVLLGRRENKKYAIKIANVSPSSSSSSTRLGISTFSDLSKESKSLQE
146304560      YQVKRVVGKGGTAYVLLGERGGQAYAIKIPFISPASAGERTRLSKTTTFADMAGESSKLQE
70607598       YKVESVLGEGGTSYVLSATS-GERFAIKVPKLSQPSSS-ATKLSKVTFEELYKESNLQR
15921012       YRIIDYLGKGSAYVLIGEKNKKYAIKIPILIPLSNV-----VESYYDFINEYSQLRE
* :      :* **::*** . .: :***:. : *          :: :: * **:.

146303114      ISERSNDIVKLYGVYADVNTIREILEGKSFLYLTNPPAIVMELMTGGTAEDLVKKEAVFL
146304560      ISTKTEDMVTLYGIFVDRTAITEILSGKVEVYLKSPAMVMEFMGGGDVDSLLKEQAVFY
70607598       LSEGVENVVKIYGIFLDINLLRRIERGEVKYYLTNPPAIVMEYMEGGTLADLMRNDIVVN
15921012       LSLSSDSIVRFVDAIIDVSAIKRIKGDVLAFLNEPPIVMEFMEGKSVKELIQNDNVYY
:*      :.* : . * . : .* *. **..** :*** * * .*:::: *

146303114      SSNWPSVVRIIFMSTARALSVVHRENYVHLDVKPRNIFFSEPPGNTGGEVLNVLNGKTA
146304560      SEKWERIVTFILMRVARALNMVHTEGYVHLDVKTKNIFFSSFPGRSGDEVFENLVTGRVK
70607598       SSHWGDIVKVVARKVAKALDYIHSSGYVHLDVKPQNIFFSAPVGKTGGEVFDSLVKGRNE
15921012       SDEWEKIVLLIALEVVKSLIEDIHKAGFVHLDIKPSNILFSSLPGKTGKEVLDNLTQKKVK
*..*      :* .: .:::*. :* .:***:*. **:** *.* **::.* .

146303114      VKLGDGSGARRRGERITEYTAEYCPVDQVEDMLLGRGARPDMDFALGATIYRLINGTSL
146304560      AKLGDGSGAKKVGGLDQYTAEYCPVDQVQALLMRSGAHPRMDIYALGATGYKMLTGQIL
70607598       VKLGDGSAKRVGERVSQYTPNYCPVDQVEALIVGKGAETTMDEVYAFGATIYALTGKAF
15921012       IKISDLGSARKIGEKFYSQYTPYCSVDQVEAIVEGKGADPSMDIYSLGATIYKMLTRKDF
*:.***:~::~ * . :*.~**~***:~::~ ** . **::~*** * :. :

146303114      NPPEVVREMDGAVDAFLRRGDFRANLDRARRAYSAVHSSLR---LSRFH-EVEGLVKKMT
146304560      NPAEVLKMDGAVDEYLNRYGNSVLIQAFREYQKFYAGLS---LPGVDPELANVIKAMV
70607598       SPPEVGLVEEAVEDYTRGGSPLGKLLKLRDRYEEYFNVLPSTLTSAPREISEVVIKAT
15921012       NPPELIRLFNEASIIYSNGGDKPILQKAKEVYKEYYMKLE---IPDVDQRFKDLVKELV
.*.*:~:~: * : . * . :. * * . : : :. . . :~.

146303114      DPDPTRRPSIQEVLNEL-----
146304560      NPDPVRRPTAGQVATNLERILNRM
70607598       HPDPSKRAKVSELLKVL-----
15921012       NPE--KRPTASEVYNKL-----
.*:      :*.. :~. * .
```

Cluster No. 57 multiple sequence alignment

CLUSTAL 2.0.10 multiple sequence alignment

```

108756902      YVVRKLAEGGMAEIYLC TARGAEG-FEKEVVIKRVRAFLASDPEFVGMFIAEARLASRL
86158893      YRLVELLASGGMADVWRAEVAGAAG-VVKEVALKRVRGEHGARSDFVRFIEEARLASRL
108759111      YRLSARIATGGMAEVYLGRRIEDDGSRGPSVAVKRLMPHLASDRRVQMFLNEARITAQV
108763617      YELQERVGQGGMAETWRARLLGAAG-VTKSVLIKVKLPEYANDEAFVSMFISEARISATL
108762650      YEILTRLSIGGMAELFLAYTSGPGG-FRKFVAVKQILPDIKKDEQFVQMFLDEARITAAF
108762968      YEVLCLRLSTGGMAEIFLASQRGLAG-FHKLVLVKQILPDIRGEEEFVRFMFLDEAKVTAAF
108762958      YELVHPLGQGGMGVEVYLAKISGAAG-FEKPCIVKTI L PALLKDRQFLDRFHHEAKVLVHL
*   :   :.  ***.: :           *           :* :           .: *  **:: .

108756902      NHANVVQIFDFDKHEDTYYLAMEYVRGCSLWELRKRKGMELM-EPVPPMLVAHIGAEVARG
86158893      THANVVQVFEFDQVDGRYYIAMELVGRHRLGQVVERAREAG-VRLGLARAVHACAEVARG
108759111      RHPNVVTIIELGMEGTEPFIAMELLEGRSFAELRQEA AEHG-HRVPLGITLRLVLEACRG
108763617      SHGAIAQVDFDFGKVDGQYFLAMELVEGQPLNRI LKRALRSYHSLPVP IAVF IAMEMCRG
108762650      SHANIGQVFDLGEDGGELYLAMEFLPGQNL EQVMKASTRQG-YALPLGFVGRVIRDTCLG
108762968      NHPHIAQVYDLDIADGELFLSMEFVPGATLVEVARACRQAN-TPIPMGYSLMAVRDTAVA
108762958      VHSSIAQVYDMGEADGTYFMALEYVAGVDL LAYLLEQARSQG-VAVPVPVALFLGQRIAEG
*   :   : :. .           : : : * : *   :   :           :           . .

108756902      LHYAHR-VRVNGQPLDLVHRDVT PHNVLLSFDGAVKLTDFGI AKA-GNK--LTQPGVLKG
86158893      LSYAHR-LADGGRPLGLVHRDVSPHNVLVSFEGEVKLADFGIARA-MSQGLLTDPGTVKG
108759111      LDAAHRAVDEAGRPLRIVHRDFTPDNIHVG VNGAVKVIDFGI AKADALGSG-TEPGILKG
108763617      LHYAHRSDKEGPELGI VHRDISPDNVLIGYEGQVKIVDFGI AKARSLRSFNTEPGVVKG
108762650      LHYAHHFTDPSGRPAVVVHRDVSPKNVMLTYDGVV KVIDFGI AKA-RGRLGRTQVGTVKG
108762968      LHYAHTFTDPLGRPSPIHRDVAEKNIMVTYEGVTKLLDFGI AKS-LARASRTAVGMVKG
108762958      LGYAHRKTGPDGSP LGI VHRDVSPHNVMVSYEGEVKVIDFGL AKS-AARSKYTL PSTVMG
*   **           * *   : : ** .: .: :   : * .: * : * : * : * : *

108756902      KFAYMSPEQARGE A-VDARTDIFALGVVLWEMLTGGRLFDGDSEVAVLRAVQQSTIPPP-
86158893      KLAYMAPEQARGAP-VDARADV FALGVVLWELCAGRRLFARDSEATLA AVLEGAPPPPP
108759111      KFFYMSPEMIAGKP-VDHRADLFAAGVMLYEQ LCGRRPFTGLSADEV LGRIAEGRPKP-P
108763617      KYLFFSPEQARGE A-VDARTDVWATGVVLFQMLCGRLPLEG-QVHTVLRRLNSGQPLPSP
108762650      TSGYMSPEQVRG VATLDGRSDLFSVGVMLHELLSGQRLFSGPHEAAVMQIVEADVPP-L
108762968      TSGYMSPEQIMGEP-LDARSDFLSGVVLHECLTGMRLFYAKQAEAMMNAVLRCEVTP-P
108762958      KLGYSPEQVRAEP-LDHRSDIYSCGVVWEMLAGRSLIPHGTVGEMMAAMSQPVVPS-L
.   : : : **   . . : * * : : : : * : :           :   :           .

108756902      ARLNPDVPADLDAAVVRALDRDPALRFQTAAEFERALAQCVLTH--
86158893      SAWNDEVPPELDALVLAAL EHEPARRTASAGELATALSRVLL----
108759111      TAFDPSVPTALELVCLTALAREPAARFDSLEDF-----
108763617      RQVRSDIPVALDSIIQRALALQKDSRFESAHALGD-----
108762650      RGINPDVPEALEAVATRALSRDVSQRFTNCREMARAIEAALGSELF
108762968      SRTNKHVPPELDAIVMRALSKRREDRYASTLEFARA IERAV----
108762958      SELRPDVDAALDAVVRAL TARPDDRYMRSDELARALNTELV----
:   * :           **           *           :
    
```

Cluster No. 58 multiple sequence alignment

CLUSTAL 2.0.10 multiple sequence alignment

```
17131775      YRLDEELYNGSRTLVRGYREIDSLPVVVKLLKNPYPSFNELIHFRNQYTITKNLHYPGI
17132825      YFILEEIIYHGSKTVVYRAVREADQQPVVVKLLKREYPTFSELLQFRNQYAIKLNKIPGI
113476169     YHITEIIYQGTRTEVYRGTRNSDNKPVIIKVLANVNPKNFELVQFHNQYMLSRHLQHPNI
17129668      YRILELTHSGTNTNIYRATKVDGNTPTILKVLIDNYFSLEAIVRFKHEYSISTNLDHPNI
* : * : * : * : * : * : * : * : * : * : * : * : * : * : * : * : * : *
17131775      IQTYSLEPYKNGYALVMEDFGGVSLKDYFG-----KDHVVASLQEFLEIAIALCNTLDV
17132825      VNLYSLEPYRNSYAMVMEDFGGISLRDYA-----QQQSLSLTEILTITIQADILHH
113476169     LQPLALERYGNGYALVMPDNGAIALSSYWHGGLKSVDTLEQLNGEFLRIAIQLTESLHY
17129668      VKVISLETHHKRLVLFVDFGGISLKQYLY-----THQPSLQLTLQVAIAITRALVH
: : ** : : . : * * : * * . * . * . * . * . * . * . * . * . *
17131775      LYRECIHKDIKPANILIN-----PETKQ---IKLIDFSIASLLPRETQIVINKNI
17132825      IYQORIHKDIKPANILIN-----PETKQ---VKLIDFSIASLLPRETQNIISPNI
113476169     LNQKRIHKDIKPANILIIY-----PKTQQ---IQLIDFNIASLLPKAQQEVTHPNV
17129668      IHDNKIIHKDIKPGNIIKLNLDNELQKTPEVEPSLIKLTDFSIASRLKKETPQLINPNQ
: : *****.*:* * : : * : * : * : * : * : * : * : *
17131775      LEGTLAYISPEQTGRMNRGIDYRTDFYSLGVTFYELLTAELPFVSRDPMELIHSHIAKLP
17132825      LEGTLAYLSPEQTGRMNRGIDYRSDFYSLGVSLFELLTGELPFTTDDPMELVHCHIAKQP
113476169     LQGTLAYISPEQTGRMNRGIDYRVDFYSLGVTFEFELLTGELPFTTDDPMELVHCHIAKLP
17129668      LEGTLAYMSPEQTGRMNRNLDYRSDFYSLGITLYEMLTGQLPFNSSEPLELVHAHIAKEA
* : * : * : * : * : * : * : * : * : * : * : * : * : * : * : * : * : *
17131775      EKLRS-----GREREIPKVICDIVMKLMAKNAENRYQSALGLKF
17132825      DKFTIPFSCORRYANRFSNGGESTKLPNEETIPQVVGEIVMKLMAKNAEDRYQNALGLKY
113476169     -IFENK-----ELRNGVCIPQIPQMVINIVMKLMGKNPEDRYQSALGLKY
17129668      TPIQQL-----AANIPNAVVGIVHKLMAKNAEDRYSSAQGLLV
: : * : * : * : * : * : * : * : * : * : * : * : * : * : * : *
17131775      DLENCLNQL
17132825      D-----
113476169     DLENCLQW
17129668      DLEQCLEQL
*
```

Cluster No. 59 multiple sequence alignment

CLUSTAL 2.0.10 multiple sequence alignment

119900177 FEIIGLVGEGGFGIVYLAQDHSLEKVALKEYMPASLASRTAAATVAVRSEHRETFEIG  
120610153 YRLNDVVGEGGFGIVYKARDLSLDRIVAIKEYMPATLAGRKDGENVHVRS-QHRGAFDAG  
124266686 MEIVRVLAVGGFGIVYLARDHALDRDVAIKEFLPSHLVCRGEGCEVTVRSLTHATTFALA  
120612691 FEVVSLLGVGGFGMVYKAFDHSLLRFVAIKEYMPTALAARAHGQSLWVRSSSHEQSFQAG  
121593051 FEIVALLGVGGFGMVYQAFDHSLLRFVAIKEYMPAALAGRADGHSWVRSSSDEQSFQAG

.: :.: \*\*\*\*:\* \* \* : \* \* \*\*:::\*. \* . : \*\*\* . :\* .

119900177 RRSFVNEARLLAQFDHPALVKVYRFWEANGTAYMAMPYYDGRTLREVLQ-QRPVPDESWI  
120610153 LRSFINEARLLAKFSHPALVHVYRFFEANGTAYMVMQYYEGQTFRSFLA-QQHTVDEAWL  
124266686 LESFVDEAKLLARFVSHVYRFFVANGTAYMVMPLYRGPTLWELRRSMTQAPTEIWL  
120612691 LASFVAEARLLAQFDHPSLVKVFRFWEANQTAYMVMPLYAGMTLKQARAHMRTPPPEAWL  
121593051 LASFVDEARLLAQFDHPSLVKVFRFWEANHTAYMVMPLYSGLTLKQARAHMRTPPPEEWL

\*\* : \*\*::\*\*:\*.\*\*\*::\*\*.\* ::\*\* \*\*\*\*\*.\* \* \* : . \* \*\*:

119900177 RKVLAPVIDALELIHRENCFHRDVAPDNIMLIGDDRPVLLDFGAARRVIGDMTQALTVIL  
120610153 SAVLVPILDVLEMLHAADCYHRDIAPDNIFLQESGMPVLLDFGAARRIIGDMTQALTMVL  
124266686 RSIVDPILLEALQLLHAERIYHRDVAPDNVILTGAGLPVLLDFGAARRLIGDRTQLLTAVV  
120612691 RKVLWSVLGALRVLHEGQTLHRDISPDNIFLQDSGLPVLLDLGAARHAITDHSRLTAVL  
121593051 RKVLWSVTSALRVLHEGQTLHRDISPDNIFLQDHGPPVLLDLGAARHAISDRDQKHTAVL

:: .: .\*::\*\* \*\*\*\*\*::\*\* . \*\*\*\*\*::\*\* \* \* : \* \*\*:

119900177 KPGYAPIEQYAEMPG-MQOGPWTDVYALA AVIYFMITGKTPPPSVGRMMQDSYQPLATLA  
120610153 KPGFAPIEQYVDDGA-MPOGAWTDIYQLGAVLYQAITGRPPATSVARMINDPLARLTPEN  
124266686 KPHYAPIEQYAEATR-LRQGPWTDLYALSALVTFLLEGKPPPASTARSIHDDMHRLAERP  
120612691 KVNYPAPIEQYNDEGNDLRQGPWSDLYSVGAVVHGCLCNDTPLPATLRAIRDRMVVPSRVA  
121593051 KVNYPAPIEQYTAASHLHQGPWSDLYSLGAVVHGCLCNDTPLPATLRAIRDRMVVPSRVA

\* :\*\*\*\*\* : : \*\*.\*:\*\* \* :\*\*:: : . .\* :.. \* :.\* ::

119900177 AGR-----YGDAFLRGVDRCLAVKAEDRPQNMAEMREAL  
120610153 CPG-----FSARFLHGVQSALAVKPQDRPQGI AELRQLL  
124266686 FPG-----LSHGFLSAIDWGLSVRPEDRPQDVATF----  
120612691 KTVKRQFGVEYSPPFVA AVSQTALALQPQDRPQSIDDFLRTL  
121593051 RTVRKQFGVEYSRPFVDAVSQCLALALQPQDRPQSIDAFLQTM

. \* : .:. \*:::\*\*\*\*\*.: :

Cluster No. 60 multiple sequence alignment

CLUSTAL 2.0.10 multiple sequence alignment

```
17133654      YQLQELIGTGAMGRVYRAKDVLGGVPVAVKFLALSMQNEKMRLQERFEREAKTCALLGQ
22297988      YQLTELIGKGSMDGRVYRAEDILLGGVPVAVKFLSQTLLND--RMKTRFAQEARAGALLGQ
86604933      YRLTHLLGQGGMGRVYLAQDLLFGGVEVAVKLLSQPAMDE--QARLRFEREAKACAALGQ
17132301      YQLQKLIGIGGMGEVFLATDILLGGAPVAIKFLTQTVCDP--KIQKDFAREALMSAALSQ
17132302      YLIIDLIGKGSMDGRVYLAEDAAGKGGKVALKILMLNLVNQ--HISQRFAREIFIGAQLGR
* : .*: * .***.*: * *   **   **:*:*:   :   :   * : *   * * .:
```

```
17133654      KSIHIVRVMDYGVNDENKIPFYVMEYLOGQSLNQIIRQONISLSRFVSMARQICLGLQCAH
22297988      KSMHVVRVLDYGMNNEEIPFYVMEFLEGENLSDLLLEEPLPLSRFLRIARHMCLGLQVAH
86604933      KSLHIVKVS DYGITADGVPFYVMEYLNQTLKDILATGSLPLERFFRLARQIGLGLKAAH
17132301      KSLHIVRAYDYGVSDTGKPFYVMEYLNQKSLK---DLIPLPLNQFVHLTRQICLGLQCAH
17132302      KSKNIVRVLSYGVTDKTPFYVMEYLOGKNLKQILKLPKPLTIEKFLDICYQICVGLKCAH
** :*: . .**:   *****:*:*:.*.   :.:.:* . : : : **:
```

```
17133654      NGIPFDGTVYPIIHRDIKPSNILVIQDPSFGELVKVLDVDFGIKLLQSNSD--QTKFYLG
22297988      EGIIEGQKCIHRDIKPSNVLVIQDGTMGELAKLLDFGIKFLGDVPEKQOTSSFMGT
86604933      EGILLEGQRIQVIHRDLKPANVIVLADESLGELAKLVDFGIKLLNTRESLSLTHAYLGT
17132301      QGIQIEGKVYPLVHRDIKPANILVIPDPILGQLVKILDFGIKFLNHTVTLSTNRGFHGT
17132302      QGILLKGEIYPIVHRDIKPENIFITENNKQENVKILDFGIKFLTERSGMTLTDSEFIGS
:* :.*   :***:* *:::   :   . : .*:*****:*   . : *:
```

```
17133654      LAYSSPEQMEGKE-LNNRSDIYSLGVMMFEMLTGKMPLVAPTHSFGSWYKTHHHQPPRTF
22297988      LAYCSPEQIEGRE-LDHRSDIYSLGITMYELLTGKMPIQAESH SIGSWFKAHHFQKPIPF
86604933      LAYSSPEQLEGLP-LDARSDIYSGIMLYQMVSGOMPLOPTTESFPGWYQAHHKQRPLPL
17132301      LPYCSPEQLDGEK-LDGRSDIYSLGVIMFEMLTGAKPWQPETDLFGAWYKAHNFEQPRAI
17132302      LPYCSPEHMEGRKLLDVRSDIYSLGVLMFEMLTAKHPFQTQSNSEFGNWDYQHRFQTPPTL
*.*.***:.* * : *****:*: :.:.:. * . . : *::*. : * .:
```

```
17133654      SEVAPDLAIPKEIENLVMNCLAKSAKDRPSSISEILQVLESV
22297988      NVASPLHLPPALEELIMACMAKSPDRPQNVAEIIKVL---
86604933      EELGLPLALPAGLSDLILSCLAKDPAARPPTVANVLAEL---
17132301      SEVKPQLKIPQQLNDLIMACLEKKASDRPQNVGEILQII---
17132302      GEVNNQLKIPEELQDLVICCLAKEVGRPQNVQEIIQVL---
* : *   :.***: * : * .   ** . : : :   :
```

Cluster No. 61 multiple sequence alignment

CLUSTAL 2.0.10 multiple sequence alignment

2131007 YLRRLVGRGGMGDVYEAEDTVRERIVALKLMSETLSSDPVFRTRMQREARTAGRLQEPH  
13881430 YLRRLVGRGGMGDVYEAEDTVRERIVALKLMSETLSSDPVFRTRMQREARTAGRLQEPH  
31792931 YLRRLVGRGGMGDVYEAEDTVRERIVALKLMSETLSSDPDFRTRMQREARTAGRLQEPH  
145225785 YELHSVIGVGGMGVEYRAYDTRARERMVAIKLLRPEMAADHSFQERFRRESRVAARLQEPH  
41408129 YELRSLIGTGLGEVYRAYDTVKDRLVALKLLRGELDAG--FRQLWRDCRAVTRLQEPH  
41408124 YEIRRLIGKGGMGVEYAYDTTKGRAVALKLLTDNYADDEKFRERFLRESRAAAIILQEPH  
120402048 YRLQKLIGRGGMGVEYQAYDTKTDRVVALKVLPHSMAQDETFQARFRRESQAAAAGINDPH  
145225811 YRLQKLIGQGGMGVEYQAYDTKTDRVVALKVLPHHMAQDETFQARFRRESQAAAAGINDPH  
134097137 YKIDAVLGRGGMSVMYRATDTRLGRKVALKVMGEHITGDAEFRERFVDEARNTSAIDHAN  
29827698 YRIEREIARGMAVVYRARDLRLDRTVALKLLAPELALNDTFRRRFTHESRVAADIDHPN  
108758719 YHLDKLVGSGGMGEVHKATQLSLGRTVAVKLLNPELAKDPSFIARFQKEAAALAALSHPH  
\*.: :. \* :. :.:\* : \* \*\*:\*: . \* \*: :. :.:

2131007 VVPIHDFGEIDGQLYVDMRLI-NGVDLAAMLRRQ-GLAPPRAVAIVRQIGSALDAAHAA  
13881430 VVPIHDFGEIDGQLYVDMRLI-NGVDLAAMLRRQ-GLAPPRAVAIVRQIGSALDAAHAA  
31792931 VVPIHDFGEIDGQLYVDMRLI-NGVDLAAMLRRQ-GLAPPRAVAIVRQIGSALDAAHAA  
145225785 VIPVHNFGEIDGVLYIDMRLV-EGASLKEVLRSD-GLQPARAVSIIQVAAALDDAHAN  
41408129 VLPLHDFGEMDGVPIIDMQLVDDGGSLKELLREQ-GGLEPSRAASITGQVARALDAAHAA  
41408124 VPIHDWGEINGVLYIDMRLV-QGQTLHEMLKT--GSLEPRRATDIIRQVASALDAAHAA  
120402048 VVPIHGGEIDGRLYLDMRLI-EGRNLGTMLQETEKPLGAAFAVTVVEQVANGLDAAHKL  
145225811 VVPIHGFEIDGRLYLDMRLI-EGRNLGTMLQETDKPLGAAFAVMIVDQVANGLDAAHRL  
134097137 IVPDYDFGEVDGMLYIAMRLV-DGSDLASKIK--DGPISAQRTLELLGQVAEALDMLHER  
29827698 IVPVFEAGETEGVLYIAMRFV-SGRDLRHLDR-EGPLPFSAGVRIALQVASALDAAHDH  
108758719 IVSIVDKGKTDTTYLVMFEV-DGPSLRELIREP--QLDVMGALRRMLQICRAIEYAHGR  
:.: \* : : : \* :. : \* \* : : \* : : :

2131007 GATHRDVKPENILVSA-----DDFAYLVDFGFIASATTDEK-----LTQLGNTVGTLYY  
13881430 GATHRDVKPENILVSA-----DDFAYLVDFGFIASATTDEK-----LTQLGNTVGTLYY  
31792931 GATHRDVKPENILVSA-----DDFAYLVDFGFIASATTDEK-----LTQLGNTVGTLYY  
145225785 GLVHRDIKPENVLLTG-----DDFAYLVDFGFIAGHGGGEAS-----VTSTGLVVGSSAY  
41408129 GLMHLVDKPENILLTH-----DHFTYLADFGLAQAAGDDK-----LSRT-----Y  
41408124 GLIHRDVKPQNIIVTP-----DDFAYLVDFGFIAGAEARGDTH-----LTMAGHTVGTFDY  
120402048 DLIHRDIKPSNILITG-----RDFVYLIDFGLARTAGEKG-----LTTAGSTLGTLAY  
145225811 GLIHRDIKPSNILITD-----KDFVYLIDFGLVRTAGEQG-----LTTAGSTLGTLAY  
134097137 NLVHLDLKPANVLVTSRESS--SEHVYLADFGLTRRGATGH-----RTSSGDFLGSPTY  
29827698 GLVHRDVKPKNILVARGTDSHPEHVYLTDFGLTKRSLTVTG-----FTIPGQFVGTLDY  
108758719 GVIHRDLKPENILLDQO---AGGIKVSDFGLASFLEDASPSRYALTSTHVMGMTLSY  
. \* \* : \* \* : : . : \* \* : . : \*

2131007 MAPER-FSESHATYRADIYALTCVLYECLTGSPPYQGDQLS-VMGAHINQAI PRPSTVRP  
13881430 MAPER-FSESHATYRADIYALTCVLYECLTGSPPYQGDQLS-VMGAHINQAI PRPSTVRP  
31792931 MAPER-FSESHATYRADIYALTCVLYECLTGSPPYQGDQLS-VMGAHINQAI PRPSTVRP  
145225785 MAPER-FSGERGGPASDIYSLACLLYESLTGRAPFEADVQVWSAHMFAAPRPSIMRR  
41408129 MAPER-FTTGSLGPQTDIYSLACVLYECLTGQPPFEGADPGELRSAHLLSPAPRPSIMRR  
41408124 MAPER-FGDEETSAVDVYALACVLYEALTGAKPFPVHSAEQAIRAHLSSPPRPSAVNP  
120402048 MAPER-FEGGEVDARSDIYALTCVLYECLTGSRPYPADSLEQQIAGHMVSEIPRPSDTP  
145225811 MAPER-FEGGEVDARSDIYALTCVLYECLTGARPYPAESLEQQIAGHMVSPIPRPSDVP  
134097137 AAPEH-LRGEVVDGRDLYALACMLFACLTGRPPFQG-QVQEVIQGHLHGEPKVTLS-LV  
29827698 VAPEQ-ICGKPVVDGRCDVYGFVGVVYELAGTTPFCRDDEALLWAHQHDEPPRLSRRRP  
108758719 MAPEQRVDAKSADARADIFSLGVILYEWLTGEVPLGTFDPP-----SRRKP  
\*\*\*: . \* : : : \* : \* \* . :

2131007 GIPVAFDAVIARGMAKNPEDRYVTCGDL SAAAHAALATADQDRATDILRRSQV  
13881430 GIPVAFDAVIARGMAKNPEDRYVTCGDL SAAAHAALATADQDRATDILRRSQV

|           |                                                        |
|-----------|--------------------------------------------------------|
| 31792931  | GIPVAFDAVIARGMAKNPEDRYVTCGDL SAAAHAALATADQDRATDILRRSQV |
| 145225785 | GVSRAFDDVIARGMAKNPTERYATAGELARAAAAAASAAPVA-----        |
| 41408129  | GVGRAFDDIITRGMAKQRSARFGSAGELARAASEAV-----              |
| 41408124  | HVPASFDDVIARGMAKHPDDRYGSAGALGRAAKRAL-----              |
| 120402048 | RL-AAFDEVIKGMAKKPKRYQSAGELAQA AKRALNAPVR-----          |
| 145225811 | RL-AAFDEVIKGMAKKPAKRYQSAGELAEAAKRAL-----               |
| 134097137 | VLPADIDDLRRGMAKKADQRYSTCKGLITAAKAAL-----               |
| 29827698  | DLGPQVDEVMKALAKSPEDRYDSCCLAFV-----                     |
| 108758719 | GLDSRLDAIVTRCLKPDPEDRYPSVTTLIADL-----                  |
|           | : . * : : : : * : : :                                  |

Cluster No. 62 multiple sequence alignment

CLUSTAL 2.0.10 multiple sequence alignment

108757504 YQLLSRLATGGMAQIYLARPOGAE-PDKRVVVKRILPHLAENDDFVKMFLDEARIAARLN  
108763056 YQLLKKLATGGMAEVVLARQTGIEGFHKNLVVVKRILPHLAEDREFVEMFRNEALIAARFN  
108758235 YELLRKIASGGMGQVFLAREHG-TGFERLVVLKILPHLAEDDEFVSMFLDEAGLVARLT  
108762112 YELLRKLAIAGMGAVYLARQKGPVGFQKLLVVKRLLPHLSEDDDEFIDMFLDEGRIAAHLN  
108760861 YRLVQQLATGGMAQLYLASIDGPDGFSKSCVIKRVLPDYASLESFSRMFADEAKVAALLT  
108761425 YEYVVTQLSVGGMAELFLGFTSGPGGFRKYVVIKRVLPDARDNAQFERMFLDEARITAAFN  
108760985 LNIIRRLGQGGMAEVFLAKQVGVKGFVVMKKILPQFAENPEFVDMFLFAEARANARLT  
108763014 YEYVVTPLGTGGMAQVLVARTRGPEGLGRLVALKRVLPDARDNAQFERMFLDEARITGLRLS  
108759758 YRLIDRIAVGGMAEIFLAHQQEDGRESVVIKRVLPDARDNAQFERMFLDEARITGLRLS  
108763631 YLLIKRLAVGGMAELFLSQRPPD---PELVVLKRVLPDARDNAQFERMFLDEARITGLRLS  
108760907 YQLVRKLASGGMAEVFLAKAAGPRGFVKTLVLRKRVLPDARDNAQFERMFLDEARITGLRLS  
108761736 YVLRKLAEGGMAEIFLAKLLGADGFERNVVIKRVLPDARDNAQFERMFLDEARITGLRLS  
108759765 YVLLSKIAAGGMAVTVRARTGAAGVTKPCVIKQILPHFVDDADVFEMFVIGEARVVASMS  
108762187 YTLLSQLATGGMGEIYLARLEGAQGFVKLVKRVLPDARDNAQFERMFLDEARITGLRLS  
108761001 YLLLDRLINIGGMAEVVRGKQFGASGFERLVAIKRVLPDARDNAQFERMFLDEARITGLRLS  
:: : \*\*\*. . . . . :.\* : \* : : \* . :

108757504 HPNVVQIFDLGAQDDSFYIAMEYIHGDDLRLRWRQSELMGQP-LPVPLVCRILIEACAGL  
108763056 HPNIAQVYEFGEANGTYIAMEYIHGEDLGRVMRKAASSTGQW-VARPLAIRIVAAACEGL  
108758235 HPNLIITILDTEIEGRHCLAMEYVQGGDVRREKTSRAQGA-LPVGLILRIADAAAAGL  
108762112 HPNIAQIYDLGDVVDGQYFIAMEYVHGEAVGPLGARAQHGIT-IPLGLKCRITADAAAAGL  
108760861 HPNIVQVDFDFGRVDGQYLLAMEWIQGHSLDRLRQALRSRGRV-VGTRVAVDVGLAVADAL  
108761425 HPNIAQVDFDLGREDDGLYLAMEYIAGQNLNQTITGACLRROEQ-LPLGFTLSVARDVCMAL  
108760985 HPNVVQTFDFGVSDGVAYILMEYVVRGPDLLKLVIELRRKGLA-LPLEHALRIVADVAAGL  
108763014 HPNLFVHFYDFGEAEGAYIAMELVRGVLDLRLRAAKG---P-LETAHAVAMVCQGLAGL  
108759758 HPNVVQIHDLGKIADSYFIAMEYVSGRDMRRVVPKAEALGIP-FPLVYAVKIASVCVAGL  
108763631 HPNIVQVHELKGEKDNFIAMEYVVEGVDLRRVMAEESKFGAT-VPYGAARICAQVAAGL  
108760907 HPNIVQIFDFGEAEGSFFLAMEYIDGPNLRKLVKRAEAEA---LPPAFCAKVVAAAAGL  
108761736 HPNIVQIQELGFAEGCYIICMEYLAGEDFSTTLRLLAGRKRHY-VPLPVVLRVLI DAARGL  
108759765 HSNIAQIFDFGEVDGQYFIAMELVQGGPLSKVLRRAQRMGMASFPPEPLALHVASKLCDGL  
108762187 HGSIAQVLDMGLHEDEAYMALEHVDGKDLRKAARVDRQMP-LPVTFILYTMGRVLDAL  
108761001 HANVASIYELGNILGSYFISMEYIPGKDMRAIFDRCRKKGEP-APVPLVAFVSKMCEGL  
\* . : : . . : : \* : \* . . \*

108757504 DYAHKRTDPTTGRPLGIVHRDVSPQNILVTFEGGVKVVDFGIKAADQATVTR-SGVLKG  
108763056 HYAHSRTD-DAGRPLRVVHRDISPQNILISFDGSKLVDFGIKAADQASLTK-SGAIKG  
108758235 DYAHQARD-AQGKPLRLVHRDVSPQNILVGFDDGGVKVIDFGVAKAATSSQNTA-TGVLKG  
108762112 DAAHNARS-PSGRKLLIHRDVSPQNLVGFNGGVKVIDFGVAKASGKLSQTI-VGTIKG  
108760861 AYAHAKTL-PDGTPLMLVHRDVTPGNVLSRDGIIKLADFGIVKSAVNAERTV-AGVVKG  
108761425 HYAHTYTA-PSGAPSPVIHRDVAQKNIMVTYDGVVKKLLDFGIKAKDSLERTN-VGTVKG  
108760985 HYAHAYVD-PAGTPHPVVHRDVSPHNVLISLDGAIKLSDFGIKAVAG-EEHTQ-AGVLKG  
108763014 HAAHVLDG-EDGAPLELVHRDLSPHNLMVGFDDGRVKKLVDFGVAKARAQRTVTL-PGIVKG  
108759758 HHAHTKGD-LYGNPLNIVHRDVSPENIVVAFDGSVKILDFGIKAANQMEQTR-NGEIKG  
108763631 DYAHHSRG-VDGRPLELIHRDVSPQNVMIYDGRVKKLVDFGIKAGAFMERSK-PGVIKG  
108760907 AYAHEFRDVETGEPLGLIHRDVSPDNILVSRQGAVKVVDFGIKAVAGQGHRTL-TGVVKG  
108761736 HFAHEFTN-EAGQPLNVVHRDISPSNLYLTYQGVKLVDFGIKAESRLVNTR-TGVVKG  
108759765 DYAHRHVG-EDGLALGLVHRDVSPDNVLISYEVEVKVIDFGIAKVTSAVEAKTSPGTLKG  
108762187 AYAHKRD-DDGEDLKLVRDISPQNILISYEVEVKVIDFGIAKVTSAVEAKTSPGTLKG  
108761001 DYAHKRD-GMGREMNIVHRDISPQNLISYEVEVKVIDFGIAKAA-GKATKTQAGILKG  
\*\* \* :\*\*\*\*: \* : : \* :\*: \*\*:\* . . : \*

108757504 KYSYMSPEQAA-GMRVDCRADIFALGIVLYELLTSTRLFKRPNDIQTLTAVSECRVLPPS  
108763056 KFAYMAPEQAA-GKPLDGRADIFAIGLVLYELLTGVRPLKRDSELATLQAAAMECAIAAPS  
108758235 KYPYMSPEQAS-GLAIDARSDFALGVVMWELLTGKRLFKGESDMMTLRLVKDCQVPRPS



108762112 KHAYMSPEQAR-GEPLDSRSDVFLGTVFYELLTQORLQFKRETELATLKAVVGTKIVPPS  
108760861 KYPYMSPEQIT-SQELDHRSDLYSLGIVLYEAATGRRLFKRDTLEATIMAASQANVPPPS  
108761425 TTGYMSPEQVR-GDTLDGRSDFSVGVMMHELITGARLFAGKNERDEMMKILEAPVPWPS  
108760985 KISYISPEAAS-GRTLDARNDVDFALGVVLFELLTGSLPFRRDHDAATLQAIVRDPAPVPS  
108763014 KPLYMSPEQAR-GMRLDARSDFLAFGLVLYQSLIGARAFKPEELATMHAICDEALPPRP  
108759758 KLSYMSPEQCL-GKPLDCRSDFSLGVVLYEWLTGFKLFTGESEAAVMRSITDGKIYAPS  
108763631 KFLYLAPEQVS-QERLDHRADIFALGTMLYEITTGROPFPAKPTTEGILYAIRYEDPSPPH  
108760907 KVAYMPPEQLQ-AKAMDRRVDVYALGVVLYELLTGKRPFDATTDVSVMQAILFESFIPVS  
108761736 KYMYMAPEQAR-GKEVDRRADIFALGVVLYEALTHVRPFSRENDLAVLNALLQOGELKPPR  
108759765 KYPYFSPEQAQGRQDL DARTDVYAAGVVLYEMVCGKRPYEGEFVTVLPRILVADRLPP-S  
108762187 KFLYMSPEQAR-HQPVDRRSDLYAVGLCLYELICGKNPFDGVHPGELMSLVANPRIAPLD  
108761001 KFGYMSPEQIR-GLPLDRRSDVFAIGVCLYEMLTGERLFGVSDSDFSVLEKVRKAEVPSPT  
. \* : . \*\* : \* \* \* : . \* : :

108757504 HVTSRVPADLDAIVL KALAKELPDRYQEA AHLQHAL-----  
108763056 QVAD-VPEEMDPVVMRAIAKNSDDRYRDARQFQMALEEILV  
108758235 QLNPRLPGLDEVVLKALAPSPDQRYPCGAFRLA-----  
108762112 EVVPEIPKALDAIVFKALARKRDERFSTAGELQLAL-----  
108760861 EGTPDFPAELERIILRLLQKAPSARYQSARELRDDL-----  
108761425 HVAPHVPEEVSKVVMRALERSREKRFANGRDMARAI-----  
108760985 QLKPNIPQDVSDLVLRALVKDPARRTPSAAALREEI-----  
108763014 ---SHISRALWDVLETALAKRPEARFGSAREMADRL-----  
108759758 YFREDLPERLETILMRALERDRDKRYQTAAQMOKDL-----  
108763631 LIRDDYPPALSRIVMRCLTKDRALRYQRASEVHDALESF--  
108760907 ARRPDVPVALQQVLDKALAKDRERRYADCRALQDDL-----  
108761736 ELRPDLPEELEAILLKAMAFKPEDRYPTAEAFADALETF--  
108759765 ALNPTVSEDMETVISHAMALDREARYQTAKDLSESL-----  
108762187 QVEPLTPPAVTALVAKALAVDPSQRFQTAEFRGRL-----  
108761001 TYNRRIPETLERIVL KALAKDVDERYQYASELGDDL-----  
. : :: : \*

Cluster No. 63 multiple sequence alignment

CLUSTAL 2.0.10 multiple sequence alignment

```
119900250 YRIERQLSLGGFSIVYLAYDDDDGTAVAIKEYLPNSLALRKEGQIEPLVPDENLPAFRYG
71909460 YIIDRQLSLGGFSIVYLATDPE-GRQVAIKEYLPNSLALRSKGEIKPVITA EHLGAFRYG
91774401 YEIKKLLSAGGFSFVYIARDLENNTTVAIKEYLPNMLALRKEGDQVRIPTNEAAAAGFRFG
113866975 YRIVKKLASGGFSFVYLATDDT-GAPVAIKEYLPASLARRNP GELIPVVPEENAAA AFRLG
17429176 YRIVKKLASGGFSFVYLATDEH-GTPVAVKEYLPSSLARRSPGELIPVVPEESASAFRLG
120612228 YRVVRLSSGGFGVVYLA VDAE-GQQVAIKEYLPSSLATRSPGELLPKVPPEKLSLYRLG
121593345 YRVVRLSSGGFGVVYLAIDAE-GQQVAIKEYLPASLATRAPGELLPKVPPEKLSLYRLG
121611074 YRVVRLSSGGFGVVYLA LDPE-GQQVAIKEYLPAALATRAPGELLPKVPSDKLSLYRLG
121603724 YRVVRKLSAGGFGVVYLA VDNE-GQQFAIKEYLPSSLASRAVGELLPOVLPEKLSLYRLG
91787233 YRVVRKLSAGGFGVVYLA VDNE-GQQVAIKEYLPSSLATRSPGELLPOVQPEKLSLYRLG
89900417 YRVVRKVAAGGFGVVYLA EDSE-GQQVAIKEYLP SALATRVAGELLPOVQPERLSLYRLG
124267892 YQVIKCLAAGGFGVVYLC EDSE-RRLIALKEYLPASLAERSVGELTPRVKPEKQPLYRLG
134095313 YRIVKKIASGGFSIVYLAYDED-GNAVAIKEYLPSSLALRQP GELVPAISPENLPVFRIG
34499304 -----GGFSVVYLA LDDD-DRKF A IKEYLPRNLAERKDDGGVTVPHDLDRDAFNLG
          ***..**:. *      .*:***** ** *      .           :. *
```

```
119900250 MKCFEGRSLAKLMHPNVVRVLNFFRANNTVYMMVMQFERGRTLHDYIQKHRG-----DV
71909460 MKCFEGRALARLSHPNIVRVLNFFRANNTVYMMVMEYEHGRTLQEFIQKHQG-----HI
91774401 LKCFEGRALANIEHKNIVRVQNFFRANNTVYMMVMRYERGKSLQEYVLARDT-----PL
113866975 LKYFFEGRSLARISHPSVVRVNVNFFRENSTVYMMVMNYELGKTLQEHVLAARQQGGPKVL
17429176 LKYFFEGRSLAKISHPSIVRVLNFFRENGTVYMMVMTYEQGKTLQEHVVGARQQGKLVKVL
120612228 LKSFFEGRALAQISHASVSVL NFFRENSTVYMMVMNYLEGATLQDFIITARDLKTQKVF
121593345 LKSFFEGRALAQISHASVSVL NFFRENSTVYMMVMNYLEGATLQDFIITARDLKTQKVF
121611074 LKSFFEGRALAQISHASVSVL NFFRENSTVYMMVMNYLEGATLQDFIITARDLKTQKVF
121603724 LKSFFEGRSLAQISHGSVSVL NFFRENSTVYMMVMNYLEGGTLQDFIITARDLKKPKVF
91787233 LKSFFEGRSLAQISHPSVSVL NFFRENSTVYMMVMNYLEGGTLQDFIITARELKKQKVF
89900417 LKSFFEGRSLAQISHPSVSVL NFFRENSTVYMMVMNYLEGASLQDFIITARDLKRDKVF
124267892 LKSFFEGRSLAQISHPSVSVL NFFRENSTVYMMVMNYLQGDTLQDFIITARDLKRDKVF
134095313 LKCFEGRALARIAHPNVSVTNFFRANSTVYMMVMGYESGRSLQDHIILRRRDKGEKPLV
34499304 LKCFEGRVLSGISHPAVVRVSNFFRANQTVYMMVMEYADGRSLGRELELAGG-----RM
          :* ***** * : : * : : * ***** * ***** : * : * : *
```

```
119900250 GERFIRGVFTRMLNGLREVHAHKLHLHDIKPSNIYLRDGTGTPVLLDFGAARQTLALDQPM
71909460 SERFIRGVFTRLLNGLREVHSNKLHLDLKPSNIYLRGDNTPVLDIFGAARQTLVTDQPI
91774401 PETMLRSVFGQLLNGLREVHAQKLLHLHDIKPANIYIRLDGSPVLLDFGSARMALNEASNA
113866975 REHFMRKVFDLMSGLREVHIHKLHLHDIKPGNIYLRDESPILLDFGAARQTLTMEEAR
17429176 RERFIRQVFDLMSGLREVHIHKLHLHDIKPGNIYLRDSSPILLDFGAARQTLTAEASR
120612228 RESTIRSLFDEVLRGLRIVHQHKLHLHDIKPANIFITDDNKAVMIDFGAAREVLSKEGNF
121593345 RESTIRSLFDEVLRGLRIVHQHKLHLHDIKPANIFITDDNRAVMIDFGAAREVLSKEGNF
121611074 RESTIRSLFDEVLRGLRIVHQHKLHLHDIKPANIFITDSNKAVMIDFGAAREVLSKEGNF
121603724 RESTIRSLFDEILRGLRIVHQHKLHLHDIKPANIFITDDNRAVMIDFGAAREVLSKEGNF
91787233 RESTIRSLFDEILRGLRIVHQHKLHLHDIKPANIFITDDNRAVMIDFGAAREVLSKEGNF
89900417 RESTIRSLFDEILRGLRIVHQHKLHLHDIKPANVFITDDNKSVLIDFGAAREVLSKEGNF
124267892 RESTIRSLFDEILRGLRIVHQHKLHLHDIKPANIFITDNDKAVMLDFGAAREVLSKEGNF
134095313 SERFIRKMFSHVMNGLREVHTNKLHLDLKPSNIYLRVDGTPILLDFGAARQTLKADLPK
34499304 EERLIRKWF AALLSGLREVHSRLLHLHDIKPANIYLRNNGVPLLLDFGASRQTLARQDKH
          * : * * : : *** ** .:*****:*.*: : . .:*****:* *
```

```
119900250 LKPMYTPGFASPEQLGQREALGPWSDIY SVGASIYACIVGAAPPSDERLKHDTIMPISR
71909460 LKPMYTPGFASPEHYGNRKDLGPWSDIY SVGASMYACLAVAPQAADARMKKDTLP PAMM
91774401 LPPSYTPGFASPEQYGRKQLGPWSDVYSIGASMYACLLQAAPQAADQRVKKDQLVPAAR
113866975 FQPMYTPGFAAPELYGKHS DLGPWTDVYSLGATLYACMAGMPPEANQREKEDRMGDALA
17429176 FQPMYTPGFAAPELYRKHNLGPWTDIY SIGATIYACMAGAPPEATQREKEDKLG ENLE
```

120612228 IRPMYTPGFAAPEMYRRDSSMGPWTDIYAIGACIYACMQGFPPNEAPQRAEKDRSLALS  
121593345 IRPMYTPGFAAPEMYRRDSQMGPWTDIYAVGACIYACMQGFPPNEAPQROEKDRSLALN  
121611074 IRPMYTPGFAAPEMYRRDSSMGPWTDIYAIGACIYASMQGFPPNEVPQRIEKDRSLALALT  
121603724 IRPMYTPGFAAPEMYRRDSSMGPWTDIYAIGACMYASMQGYPPNDAPORLEKDRSLALS  
91787233 IRPMYTPGFAAPEMYRRDSSMGPWTDIYAIGACIYASMQGYPPNDAPORLEKDRSLALS  
89900417 VRPMYTPGFAAPEMYRRDAAMGPWTDIYAIGACIYACMLGYPPNEAPORLEKDRIAMALT  
124267892 IRPMYTPGFAAPEMYRRDGTLPWTDIYAIGACIYACMQGYPPNDAPORIEKDRGLSLS  
134095313 LYPMYTPGFAPPELYVKNGNLGPWTDIYSIGASMFACMVGAPPQPADQRKLNKMDGHFN  
34499304 FAAMYTPGFAAPEQYDKSQPLGPWTDIYAIGACLYVCMGGATPQPSRERCEQDLLAPASQ  
. . \*\*\*\*\*.\* \* :\*\*\*\*:\*:\*:\*:\* :...: .\* \* .\* :

119900250 THAGRYSGQLELIEWLSRLDPLARPOSVYTLQKALM  
71909460 RWDGQYSDRLEIIDWCLNLNHLRPOSVFALQKALV  
91774401 LGKGRYSPNLEIIDNCMALDYMDRPPSVFALQKSLL  
113866975 RLRSSYTNGLVDLVEWCLRLTPAERPQSV-----  
17429176 RLRTVYTGSLIDLVAWCLKMKPEERPQSV-----  
120612228 KLRGVYSDNLIIEVVEWCMALDPLSRPQSV-----  
121593345 KLRGVYSDNLIIEVVEWCMALDPLSRPQSV-----  
121611074 KLRGVYSDNLIEMVQWCMALDPLSRPQSV-----  
121603724 RLRGVYSDNLIIEVVEWCMALDPLSRPQSV-----  
91787233 RLRGVYSDNLIIEVVEWCMALDPLSRPQSV-----  
89900417 RMRGVYSDNLIIEVVEWCMALDPLSRPQSV-----  
124267892 RLRNVYSDNLIIEVTEWCMALDPLSRPQSVFALQKELA  
134095313 KLEGVYSSDLIKVIRWSLMIDPLERPOSVFALQKAL-  
34499304 VFRHRYRELTLGLCDRCLSLEPNLRPASVLEIQKSL-  
\* : \* : . : : \*\* \*\*

Cluster No. 64 multiple sequence alignment

CLUSTAL 2.0.10 multiple sequence alignment

```

145595768      YRVRSRVARGGVATVYTATDERLDRIVAVKIIHPASGPEAQGQTA---GFVERFADEAKT
50842217      YEIVSKIARGGMATVYRAQDLCLPRIVAVKVMH-----EGLDA---ELAERFDSEAKA
126435861      YRVDAPAIATGGMSTVYRGLDRLDRPVALKVMMP-----RYSGDQ---QFLTRFQREARA
145223559      YQVDTLIAAGGTSVYRGLDLRLDRPVALKIMDS-----RYAGDE---HFMTRFQREARA
41408012      YLIESKIASGGTSTVYRGVDTRLDRPVAVKVMMP-----RYAGDD---QFLTRFQREARA
68535808      YRIGAQIARGGMSTVYAAIDTRLDREVAVKVMMP-----ALAREP---AFRTRFEREARA
134098292      YRVDSLARGGMSAVYRGLDTRLDRPVALKVMMP-----QYSGDR---SFVARFELEARS
21220588      YRVEARIAVGGMATVYRAVDTRLDRVLALKVMHP-----TLATDA---TFVERFIREAKS
29832634      YRVDARIAVGGMATVYRAVDTRLDRVLALKVMHP-----TLAADG---SFVERFIREAKS
119026032      YRVVSRIADGGMATVYQAVDERLGRVVAIKIMHT-----QLAQGPORDQFVERFHREARS
23326698      YRIVRNIAEGGMATVYEAIIDERLGRVVAIKIMHT-----QLAKGPHREQFVERFRREANS
28493183      YLITEKIASGGMATVYKGDIRLKRVS IKIMHD-----HLVDDP---KFTEKFI AEAQL
119025056      YQLGQLVGRGGMAEVHVATDTRLGRVAVKIMRA-----DFATDS---IFLERFRREAHS
23325797      YQLGQLIGRGGMAEVHVALDTRLGRVAVKIMRA-----DLANDD---IFLARFRREAHA
21222231      YQLRDLLEGGMASVHLAYDSVLDROVAIKTLHT-----ELGREQ---AFRERFRREAQA
* :   . : ** : * : . * * * : : : * :

```

```

145595768      IARLTHPNVAVYDQGIH-----ADRPYLVMEYVRGRTLRLDVLTER----HRLNPD
50842217      AARLVNPHVVS VFDQGM-----GDRPFIVMEYVPGCTLRHIITQE----APLTPV
126435861      VARLKDPGLVAVYDQGLD-----GQYPFLVMELVEGGTLRELLRER----GMPPPH
145223559      VARLKDPGLVAVYDQGLD-----GRHPFLVMELIEGGTLRELLRER----GMPPPH
41408012      VARLKDPGLVAVYDQGLD-----ARHPFLVMELIEGGTLRELLGER----GMPPPY
68535808      VAKLSDPSLVNVFDQGV-----DDYVFLVMELVEGGSLRELLKER----GMPPPH
134098292      AAKLHHPDVAVYDQGV-----IDGDQVYLVMLQVEGCTLRDLMRDQ----GRLSLP
21220588      VARLDHPNVVQVFDQGA-----GAYVYLAMEYIAGCTLRDVLRLRER----GALRPR
29832634      VARLAHPNVVQVFDQGA-----GSYVYLAMEYVAGCTLRDVLRLRER----GALQPR
119026032      AAAIANPHIVQVYDTGEF-----DGLDFLVMEYVHGVNLRVEMNQD----VTF SVR
23326698      AASIANPHIVQVYDTGEF-----NGLDFLVMEYVHGVNLRHEMNAQ----GTF SVR
28493183      AAGISNANIVNVFDQGRE-----NRIAYMVMEYVPGITLRKLLREK----HVLTVK
119025056      VAQMNNPNIVNIYDSGEETVTTETGEIEHLPYLVMEYVKGQTLRDILKVN----GALSQR
23325797      VAQMNNPNIVNIYDSGEELVSSGESDAERLPYIVMEYVKGQTLRDIKVN----GALSQR
21222231      VAKLTHTNIVSVFDTGEDDLGDMT-----TPYIVMEYVEGRPLGSLVLEDEDVRQQGAMPAD
* : .. : * : : * * : : : * * : :

```

```

145595768      EALAITEQMLAAIAAAHRAGLVHRDVKPNVLA EAPTGGAAANLVDSVVKVADFGLAQAV
50842217      RALDLEPVVSALASAHEDGLVHRDVKPNVLISDRGQ-----IKVADFGLARAV
126435861      AAAAVLAPVLSGLAVAHRAGLVHRDVKPNVLISDDGE-----VKIADFGLVRAV
145223559      AVAAVLRPVLGGLAAAHRAAGLVHRDIKPNVLI SDDGD-----VKIADFGLVRAV
41408012      AVAAVLRPVLGGLAAAHRAAGLVHRDVKPNVLISDDGE-----VKIADFGLVRAV
68535808      AAIAMKPVLTALSIAHAKGMIHRDIKPNVLI SDDHQ-----VKLADFGLVRAI
134098292      MALSVLEPMLSALGAHRAAMVHRDIKPNVLI GLDGS-----VKVADFGLVRAA
21220588      AALDILEPVLAALGAHRAGFVHRDMKPNVLI GDDGR-----VKVADFGLVRAV
29832634      AALDILEPVLAALGAHRAGFVHRDMKPNVLI GDDGR-----VKVADFGLVRAV
119026032      ETLRIVGETLDGLASAHRAAGVHRDIKPENIL LNRGH-----VQITDFGLAKAV
23326698      ETLRVVAETLDGLASAHRAAGVHRDIKPENI LNRGH-----VQITDFGLAKAA
28493183      QTLEIITCVLEGLSSAHKSLIHRDIKPENI LIGNNGQ-----IKLGDFGLSRLA
119025056      DAEQVMGVLNALLEYSHRMGIIHRDIKPGNI MISEQGV-----VKVMDFGIARAI
23325797      DCEQVMLGVLNALDYSHRMGIIHRDIKPGNI MISEQGV-----VKVMDFGIARAL
21222231      KALKITADVLAAL EISHMGLVHRDIKPGNVM MTKRGV-----VKVMDFGIARAM
:   : .. : * .. : * * * * * : : : * * * :

```

```

145595768      E---ASADDAQANQ---LMATAAYVAPELVTDGHADPRTDVYSAGIVLFEMLTGRVPYDG
50842217      G---NHTMSATSGQ---LIGTVSYIPPERVTRGSSDERSDIYSAGIVLFEMLTGHPHTG

```

126435861 ----AEAKITSTSV---ILGTAAYLSPEQVGTGNAGPRSDVYSVGVMFAFELLTGVTFFNG  
145223559 ----AEAKITSTSV---ILGTAAYLSPEQVATGETDSRGDVYSVGVMVYELLTGRTPFTG  
41408012 ----AAAGITSASV---ILGTAAYLSPEQVRDGAATPRSDVYAAGIVAYELLTGRTPFTG  
68535808 NNAMSDATNATTSVNGQVIGTVGYLSPEQVRGENLTQASDVYSAGILLFELLTGRTPFKG  
134098292 ----ASAGTTSGSV---ILGTVAAYLSPEQVTTGAADSRTDIYSAGVVLYEMLTGEPYVG  
21220588 ----DTVTSTTGAV----LGTVSYLAPEQIEHGTADPRVDVYACGVMLYEMLTGAKPHDG  
29832634 ----DTVTNTTGSV----LGTVSYLAPEQIEHGTADTRVDVYACGVMLYEMLTGGKPHAG  
119026032 ----SQATLSSTGM---LLGTAAYLAPEMIQHNQATPOGDLYSVGIMAWEMLAGKVPFTA  
23326698 ----SQATLSSTGM---LLGTAAYLAPEMIENNQATAQGDLYSVGIMAWEMLTGKVPFDS  
28493183 ----SNNTTTGTG----LLGTIAYLSPELITRSEADTRSDVYAIGIMLFELLTGQPFHG  
119025056 DD--SAATMTQSOG---VVGTAQYLSPEQARGESVDMRSDLYSAGCVLYEMLTGRPPFTG  
23325797 DD--SAATMTQSOG---VVGTAQYLSPEQARGETVDMRSDLYSAGCVLYEMLTGRPPFTG  
21222231 QS--GVTSMQTGM---VVGTPQYLSPEQALGRGVDARSPLYSGIMLFQLVTGRLPFDA

: :.\* \*:.\*\* \*:: \* : ::::\* \*. .

145595768 NRPVEVAWQHVRQDVPPPSTLVP-----LPKALDDLIVIRATRRDPGARPADAN  
50842217 DSPIQVAWAHVNKDVPAPSQYLANGTKAEHDIAWLVPGYLDLSVRACTSRDPGKRPANGR  
126435861 DSALAVAYQRMNDVPPSSVISG-----VPSQFDELVLRATMRDPADRYADAL  
145223559 DSSLAVAYQRMDRDVPSSAAIRG-----VPRQFDDLHVHCATARDPAGRFADAA  
41408012 DSMLAIAYRRLDADVPPSSAAIDG-----VPAQFDDFVQRATARDPADRYADAV  
68535808 GTPLETAMARINRPVPAPSTLMPD-----IPPEIDELVLRACHRNPTQRFVDGT  
134098292 DTALSVAYRHVNDVPPSERVPE-----LPPAIDDLVLRATRRDPAVRPADAA  
21220588 DSPAAVLYKHLHEDVPPSSAAVPE-----LAYELDELVAATARNPEIRPHDAV  
29832634 DSPAQILYQHLHEDVPPSSAAVPG-----LPATLDELVSSAAARNPGLRPPDAV  
119026032 DNPVTLVFKHVHEDVPDITTACPG-----INAGVAAFLARLTARAVEDRPPQDAS  
23326698 DNPVTLVFKHVHEDVPSVATVCQG-----IDPSVAAFIAHLTARQVDARPTDGA  
28493183 KQPMEVAHKHANLMPKPSAVNPG-----VPSVIDDIVLWACSKNPEQRPSDAS  
119025056 DSAVAIAYQHVSEVATPPSTIVPG-----LPKMWDSICAKAMAKDRQNRYSATAS  
23325797 DSAVAIAYQHVSEVATPPSAAVPG-----LPKMWDSICAKAMAKDRQNRYSATAS  
21222231 DSPLAIAYAHVQEQPVAPSAVNRA-----LPPAVDALVARALKKNPNERFPPSAE

: : : : : \*

145595768 ALLTRVQV-----  
50842217 ALLDLLRRV-----  
126435861 DMGAELEEIIIEEL  
145223559 EMADQLDVI-----  
41408012 EMGADL-----  
68535808 EFLEAV-----  
134098292 SFLSEV-----  
21220588 ALLARAREARESL  
29832634 ALLAQV-----  
119026032 VAF-----  
23326698 AAAEELSQL-----  
28493183 VLLNAL-----  
119025056 EFKNDL-----  
23325797 EFKTDI-----  
21222231 AMRDECL-----

Cluster No. 65 multiple sequence alignment

CLUSTAL 2.0.10 multiple sequence alignment

```
108760153 YRVEALIGEGGMKVFRARQLSLDKVVVLKVLRHLLSD--ERTVARFQREAKAASRLNH
116623060 YEIIKLLGEGGMGAVYKARDRELDRLIALKVIRPELAGH--PRVLQRFKQELLLARQVTH
108759959 FRILETLGAGGMGRVYKAVQSPLDRLVALKVLNPOYGEGKDPGFQKRFFLEASVTAKLRH
108762484 FSILEPLGIGGMKVYRALQAPLERVVALKVLNPSFPSSRDPGFQKRFLREASLTSKLRH
108759118 YKIESVLGQGGMGMVFRATQTSVQRPVAVKTLNPSLAAA--PQFFERFRREAELASRLRH
116623034 YEILAPIGAGGMGEVYKAADTSLDREVAIKVLPFAFAQD--PDRLGRFEREAKILASLNH
116626431 YEIIAPLGAGGMGEVYRAIDTRLKREVAVKVLPEAFAHD--PERLARFKREAEVLASLNH
116625010 YEIISPAGAGGMGEVYRARDTRLDRTVAVKVLASNLTA--PDVLQRFEREARAVSTLNH
116619169 YEILEQLGEGGMGVYKARDTQLDRFVAIKVLRDRDRA--SGRKGRFVQEAKAASSLNH
94969743 YKIFSQLGSGGMGVVYEADTTLGRRVALKFLPEQYSON--PASLERFLREARSASALNH
94971422 YRIVEKLGSGGMGVVYKAEDTRLHRFVALKFLPTELAKD--PQARARFEREAQAASALNH
108757782 YQPVRFGLGQGMGRVFLAYDPMLELRRNVALKFVVR---GDD--PELARRFLSEARAQARVRH
32475633 YKLLGHIGSGGMSSVYLAEHIGLGDKRAIKVLPKRVND--ASYLARFKLEAKAIASLNH
32477250 FLLLDQIGGGMGAVFRARDEQLGRTVAVKVIP-FAADD--PDLQRRFRNEAQAASAKLDH
38232689 YRLGDVIGTGGMSEVYEATDVLGGRKVAVKMLRADLARD--VNFRRFRREAQNSGKLNH
126433388 YRLQKLI GRGGMGEVYQAYDTHTRVVALKVLPPHLAQD--ATFQRRFRREAQAAAGVQD
: * *. * : * . . : * : ** * : .
```

```
108760153 PNSISVLDFGQAED---GALFIAMEYVAGQDLHQILS-REWPLNEGRVVRIVSQVLSALS
116623060 KNVIRIFDLGVSEN----LKFITMEFVEGRDLSLLD--ERKCTVPEALDIIQOTCRALE
108759959 PNTVTVIDYGKTED---GIYYIAMEYLEGLTLGQLLT-QMGPLPWPRALNITQQIARSLR
108762484 PNTVTVIDYGQTD---GIFYIAMEYLDGRTLAQVLG-QVGPLAWSRAIAITQQICRSLR
108759118 PNVITIFDFGRSPD---GTCYYVMELLEGESESKETVK-ROGPMLELRRALSVEQASQGLA
116623034 PNIAQIFGVE-GG-----ALVMELVSGQTLSERIA--EGPVPVAEALRIVAQIAEALA
116626431 SHIATIHGVE-ER-----ALVMELVEGESP-----HGPMFPDDAWRIASQIAAALG
116625010 PNICTLHDVG-TDN---GTPYLVMYVEGETLADRLE--RGPLPLAEAWRIAIQIGDALD
116619169 PNIIVTIYEIG-VDE---GADYIVMEFVSGRTLDRIP--RGGLRLADLLKYAIPADAMA
94969743 PNICTIYAAE-QFD---NTWVIAMELLEGSTLGLIV--DGTLENTDRILDIAIQVSDALD
94971422 PNICTIYDIG-DDN---GQGFIAEFLEGVTLKHRIT--TKPMETGEIVTLAIEIADALD
108757782 ERVCEVYEVG-EVR---GRGYIAMRFVDSGLGQLAR---SLTLEQKVLVLRQAAEGVH
32475633 PNIIVLAHDIDNDG---DVHYIVMEYVDGVDLQVLRV-RDGPLDFSTAAELISQAARGLA
32477250 PLIARVFDVGNMG---PWHYIVFEYIDGANVRDMVA-NGGPLSLDDALFFTTQVAEAIG
38232689 PAIVAVYDTGETPRAGLNTPIYIVMELVNGRTLDRDIVR-EDGPLTPSQAHAHTLIPVCHALQ
126433388 PHVVP IHSYGEID---GRLYLDMLRIEGRNLGTILEGADKPLLPFAVKVVEQVATALD
: . : *
```

```
108760153 DAHGAGVIHRDLKPENIMVEPRRNEPDFVKVLDVDFGIKI-----TDSTDDGPA
116623060 AAHGESVIHRDLKPQNIMLS----EGGKVSVMDFGLARS-----LEST----A
108759959 EAHKVGLIHRDLKPANVMVLNQETDHDVVKVLDFGLVKSFIGD-----AAPVSQDTS
108762484 EAHSQGIHRDLKPANIMLLNEQ-DQDLVKVLDVDFGLVKS-VAA-----PQEGQLSPE
108759118 HAHAEGCVHRDLKPHNIMVQQLS-GQDFVKVLDVDFGLVKA-----MESEEEEQ
116623034 AAHDRGVIHRDLKPANVKLS----PDGRVVKVLDVDFGLAKSLSGG---GSGADSRAETLTAA
116626431 YAHDKGVVHRDLKPANVRVT----PDGVVKLLDFGLAKAFSVQTYQSSSENSPTLTIG
116625010 QAHRRGIVHRDLKPGNVMLAGAR-GSTHIKLLDFGLAKLPEAHSANAAGSLTSLPTVVQS
116619169 CAHAAGIIHRDLKPGNVMVG----VDGQVKLLDFGLAKLSDLH-----DSSSDILTRPMA
94969743 VAHAHGIVHRDIKPANIFVT----RKSVMKVLDFGLAKLAVDRHAVAQTIGATAADPTSY
94971422 AAHAKGIVHRDIKPANLFIT----DRGHAKVLDVDFGLAKVTATKSAVAVEN-APTPTVDEH
108757782 AAHGAGLIHRDIKPGNIVERTEDGGLAPFVMDVDFGLARD-----WREE
32475633 HAHNRGVVHRDVKPANLLID----SDGRVRLDMGLALVS-----KTGDDES
32477250 HASRRGIVHRDIKPSNVIVT----TEGEVKLVDMGLARSD-----NFDTSED
38232689 VSHDAGIIHRDIKPANVMIT----NTGAVKIMDFGIARAL-----DDATS-A
126433388 AAHAAGLIHRDVKPSNILIT----DRDFVYLIDFGLARS-----AGEPG
: . : ** : * : : ** : *
```

108760153 LTRAG--FVCGTPEYMSPEQARGS--QLDHRSDLYAVGVILYQLMTGLLPFESDSAVGFA  
116623060 LTQAG--ALIGTPAYMSPEQALGN--QLDARSDLFSLGIIFYEMLTGVVPPFKAETVLASM  
108759959 ITQAG--IILGSPQYMAPEQARN---IADPRSDVYSLGVVLYQMLMGRPPFLAAQSIDVI  
108762484 ITQNG--TFLGSPQYMAPEQARN---ATDARSDVYSLGIVLFQMLMGRPPFIARDHIELI  
108759118 LTSTG--QVLGTPQYMPPEQAGGE--SVDQRSDLYSMAGVLYFCLTGSSPFGANTVRKAL  
116623034 MTEAG--TVLGTTPGYMSPEQTRGI--ATDKRVDIWAFCVLYELLTGRRTFRGGTFGDTI  
116626431 ATQVG--VILGTAAYMAPEQAKGR--AIDKRVDIWAFCVLYELLTGEKLFQIGIDVSDTL  
116625010 LTTEG--TIVGTFQYMAPEQLEGK--EADARSDIFAFGAVLYEMIAGRKAFFEGQSQASLI  
116619169 ETEEG--SILGTVSYMSPEQAEAR--RVDARADIFAFGAVLYEMATGQRAFLGRSKISTL  
94969743 LTSPG--MAVGTAAYMSPEQARGE--DL DGRSDLF SFGSVLYEMCTGRLPFEGTTSPIVIF  
94971422 LTSPG--STLGTVAAYMSPEQVLAK--DLDPRTDLFSFGVLYEMATATLPPFRGDSGVIIF  
108757782 GAAPN--AVQGTTPHYMAPEQARGEVSRLDRRADIYALGATLYSLLTGRPPFTGATEAEVI  
32475633 LTVANNENVLGTADYLAPEQALNS-HTVDHRVDIYGLGCTLYFLLTGRPPFAEGTLAQR  
32477250 MTASG--VTLGTFDYISPEQARDP-RLADIRSDLYSLGCTLFYMLTGSPFPFGTMLQKL  
38232689 MTQTS--AVIGTAQYLSPEQARG--KLADARSDVYALGCVLYETLTGKPPFEGETPFAVA  
126433388 MTTAG--STLGTLAYMAPERFNG--GRIDPRSDIYALTCVLYECLTGVRPYPADSLEEQI  
: . \*: \*:.\*\*\*: \* \* \*:. . . : : . :

108760153 TKHLTEEPPT--RRRPDARISPAMERLILRALSKNPADRPASAE----AFKAELQ---  
116623060 LKRTQGAAPPPI--ELVP--AIPKDVSDVVMKCLATAPADRYQSVG----ELLSDV----  
108759959 VKHINELPPAFG--SLYPNHGIPGEVEALVMKCLAKTPPERYQSM---EVMEAM----  
108762484 FAHYKEAPPTFQ--QVRPDLHIPPEIEAVVRRCLEKDPARRYQTM---ELLEGL----  
108759118 TASLTQAVPAVN--TKRQGAPVPAALDAFFKKALAPEKEDRYQNAQ---EFIDAM----  
116623034 AAVLEREP-DWD--ALPP--STPPRVLGLLQRCLRKDMGRRARDAGDIAIEIEQVLAEPA  
116626431 AHVLTKEP-DVS--KAS-----PRSHKLLHRCLEKDPKRLRDIG----DAESLLEEPV  
116625010 SAIMKDEPPSIT--ALQP--MSPPALDRLIRQCLAKEPDERWQTVR----DL-----  
116619169 AAILQGDPKPAA--EIHA--GLPRELGKIIERCLRKDPAWRYQSAA----DLKISL----  
94969743 AGILERDPLPPE--QVNP--NISPKLSEIICKSLEKDRDLRYQTAA----ELRGDF----  
94971422 DAILHAEPVPAV--RLNP--DVPEKLEDILAKLLEKDRDVRYSAA----ELKADL----  
108757782 TRLOHEEPAPPR--ALDA--DIPSDLEAIVLKCLEKQRPARYDSAR----ALAEDL----  
32475633 AKHQNEMPKA----IRELRPECPGELEGIVVKMIQKDPYRYQONAT----DVAEVLEKF-  
32477250 LSHGNAaipD----IREHREDVPAEMTAILNKMLAKLPEERYQ-----RSETL----  
38232689 YQHVQEDPVKPEYIADLSPTAAINVDVAVLTAMAKHPGDRYQTAQ----EMCADL----  
126433388 AGHIVRPVVK-----PSDTPRLAAFDEVIERGMAKKPERRYQSAA----EMAAAARRAL  
.. : \*

108760153 -  
116623060 -  
108759959 -  
108762484 -  
108759118 -  
116623034 G  
116626431 G  
116625010 -  
116619169 -  
94969743 -  
94971422 -  
108757782 -  
32475633 -  
32477250 -  
38232689 -  
126433388 -

Cluster No. 66 multiple sequence alignment

CLUSTAL 2.0.10 multiple sequence alignment

```
111022033      FDLMTGLGRGAFARVFLARQ RSLQRLVAVKISQDHGTEPQTLAQFDHDYIVRVFDQRLLA
54024689      FDLMTSLGRGAFARVFLARQ RSMQRLVAVKISRDKSTEPQTLAQLDHRHIVRVFDQRVLP
111021377      FDLLMGLGSGAFGRVFLARQ RSMQRLVAVKISHDKGNEPQTLAQLDHNYIVRVFDQRLLE
111023678      FDLLMRIGSGAFAQVYLARQ QSMQRLVAVKISHNHGIEPQTLAQLDHEYIVRIFDQRLIA
111020043      FDLMMELGHGAFARVFLARQ RSMQ R WVALKISRNI GNEPQTLAQLDHPYIVRVYDQRVLE
32475105      FEIIQKLGEGAFAHVYLARQ NSMSRLVALKVANDTGDEPQALAQFDHPNIVRVFDQRQVA
*:::  :* ***.:*:****.*:* ***:::: . ***:***:** ***:*** :

111022033      GR-----DLRLLYMQYVPGGTLLDVVGRVRET PPSRS--GAVLLDAIDRALVGRG
54024689      SS-----GLRLLYMQYVPGGT LFSVLERLRAHPAQARARGGALLLDVIDEVLTKGK
111021377      DR-----QLRLLYMQYLPGGT LLRVLRRVRVTPEQDRT--GSLLLDVVDEEMREKG
111023678      DG-----ELKLLYMQYLPGGT LLDVVHLLRSTPPEHRS--GQLLLDAVDGVLAAKG
111020043      DR-----RLRVLFMEYVPGGT LLDVVRLVRKTPPEQRS--GQLLLDSVDRVLAERG
32475105      VRDDEAAGRLSELYLLYMQFHPGGT LADVVR LARSVPLVQRD--GDIHLRAVDQALLES A
          * :*:::: ***** *: * * * * : * : * : .

111022033      EIRPSESGVRQEIATLSWPEAVSWLGRRLAQALDYAGR HGV LHRDVK PANVLLTAE GVPK
54024689      EIRPGESATRAELAGLTWPETIAWLGRR LADALDYADRCGVLHRDIK PANVLLTAE GEPQ
111021377      ELRPTDSSVRDEIASLTWPETIAWLGRR LAEALDYAGKRGV LHRDIK PANILLTAE GVPK
111023678      EVRPSES AVRARASALTWPETVAWLGCR LADALQHASERGV LHRDIK PANVLLSAE GIPK
111020043      EIRPEYSSVRDEIAALSWPETVAWIGLRL LADALDYAEEHGV LHRDIK PANVLLGLE GIPK
32475105      QVVPDRSTTRAWLVGCEWPKVVAWVGLQLADSLHTAHEAGV LHRDVK PANVLLTAE GLPQ
:: * * .*          ***::::***:***:*. * . *****:*****:** ** *:

111022033      LADFNISFSGNIAGASPVAYFGGSLAYMSPEQLEAIHPDRPGTPGDL DTRSDLYSLAVVL
54024689      LADFSISFGSTVTGASPVAYFGGSLAYMSPEQLAAVHPDLPGTAADLDVRS DLYALAVML
111021377      LADFNISFSDTVTGASPLAYFGGSLAYMSPEQLEACHRGMPGTAADLDTRSDIFALGVML
111023678      LADFNVSASNRIKGTSPPLAYFGGSLAYMSPEQLEACHPGSPATAADLDTRSDIFALAVML
111020043      LADFNVS SSVENRGAGGFIGGSVAYMSPEQLEVIDPSIHRTAADLDTRSDIFALGVML
32475105      LADFNVSMAGTAGRAGAASSLGGSVGYMAPEHL DAMSITRDGRPEDVGEAADLYSLAVLL
*****:* ..          .. . :***:***:***:*. .          . *:. :*::::*.**

111022033      WELLTGRRPFDDSDAELHSHPPGDRTTLDAMLARRR-GDAEPAADELPADCP--NALRRV
54024689      WELLTGHKPF GDD----HVTG-GDR TTDGMLERRRRGPGALPYADLPDCP--AALRRT
111021377      WELMCGRPF FEDE----DVSS-ESLVALEAMLDRRSRDIDPEFLDQLPYDCP--PSLRRV
111023678      WELLTGRRPFADE-----TSAGESETSLARMLELRRSPVEAKFLSELPPDCP--MALRRV
111020043      WELLTGARPF PDD-----DGTTSPPSPRVLLESRRRGVDPE-RSALPEDCP--AALRRI
32475105      WELWQGRPFDCS-----HETHSWTELLEEQHAARKREFLVPDRLDTPSERVLESV
*** * :** .          . : * :          * * * .

111022033      LLKSLAPEPKDRFSSGAELAQQQL--
54024689      LARALDPDPDRRWPTGADMAQQF--
111021377      LLTCLAPKPEDRWSSGAELAQQF--
111023678      LLKCLSPDRDDRYPSGSELAQQQL--
111020043      LVKSLAPDRDNRWSSGRKLTRQF--
32475105      LRSALSVNPGDRPENGAAMSGSLRL
* .* . * .* : : :
```



Cluster No. 67 multiple sequence alignment

CLUSTAL 2.0.10 multiple sequence alignment

```
1652588      YLPVKLLGQGGFGAAYLALDRFTPTMRFVVKQFQPSG-----NLNQEQLDLALSIFER
22299975     YVAERVLGRGGFGAAYLARDLDTPGWRYCVIKQFLPN-----VSDPQSLQKAQELFER
86606530     YRAFKRLGQGGFGATFLARDEDMPKPRVVIKQLRPA-----ENSPQLARLAEELFNR
113476860    YKIIKQLGHGGFGRITYLAEDNH-RFQELCVLKEFAPQ-----VHGSYALQKSQELFER
17131504     YLIVRQVGGGGFGRITYLAEDIN-RFRELCILKEFSPQ-----VQTAYVLQKAEEFQOR
17131503     YRIIRQLGQGGFGRITYLAEDIK-KSNKTCVLKEFAPQ-----VEQKEDLQKAKELFER
113474330    YKIIKPLGSGGGFDITYLAQSDLPKPKCVVKHLSPK-----SSDPIVLNIARKLFER
113474331    YKIIKPLGSGGGFDITYLAQSDLPKPKCVVKHLSPK-----SSDPIVLNIARKLFER
113474332    YKIIKPLGSGGGFDITYLAQSDLPKPKCVVKHLSPK-----SSDPMVLSIARKLFER
17131426     YKVTQVLGAGGFGKTYIAEDIKLYNN-LCVVKQLQPM-----ANDPMTLQVARRLFAS
17132907     YQIIISHLGGGGFGETFVACDTHLPGLPKCVVKLQPO-----ANDPATLEIARRLFDT
17133975     YKILKVLGYGGFSETYIAEDTQRPGNPQCVVKQLKPV-----NTQKGKQLARRLFNL
37521121     YKILQILGAGGFSQTYLALDTRRPSPTCVVKHLKPT-----SENPGLQIARRLFRS
86606961     YEILGLLGQGGFGVYKAVDRDTFNT-PCVVKRLRPL-----STDPTYLATARKLLER
22299003     YKLIRVLGAGNFGQTFLAEDVHRPIRAKCVVKYLRPA-----RRDA AFLPLARSLFQR
17133132     YQVIRTLGAGGFGETYLAEDTYMPSKRRCVVKQLRPI-----QNNPQIYQLVQERFQR
17133502     YRVIKTLGSGGFGETFLAEDSQMPSNRRCVVKQLRPI-----HNNPQIYQLVQERFQR
17133504     YQVIQILGAGGFGETLLAEDTHMPSRRRCVIKRLKPV-----SNDPQAYQSIQORFER
17132363     YRVLKPLGQGGFGATFLAHDQILPGEPSCVIKQLRPS-----GTAPHILQMARELFER
22298869     YRAIKVLGRGGFGTTF LAVDTKLPGNPTCVIKQLRPA-----ATAPHILTMARELFRLR
17130658     YQILRILGRGGFGITFLARDAVLPGNPLCVIKQLCPK-----VTSAKSWQACRRFEK
113474678    YRAIKPIGQGSFGKTF LAVDEYKPSLPRCVIKQFFP-----QNSANALKAAELFRR
113477154    YRPIKPIGRGGFGRTFFAVDEDKPSHPPCVIKQFLP-----QNTGDPKKAELFQQ
113474087    YRLLKPIGMGTF SRTF LAVDEDIPSKSVSVIKQFLPIATPGKNAEQNINEIEKASISFHR
17130683     YRVLGLLGEGGFSKTYAAEDADRLDAP-CVIKQFFP-----QIQGTGORSKAAEFFKE
*           :* * * . : * *           ::: : *           :
```

```
1652588      EAVVLEKLGNRHDQIPDLFAYFPLLVDDPRTGKQDQFFYLQVEFINGQD----LEKTVEK
22299975     EAKVLEELG-QHAQIPDLLAFFREEVAGFNSSSEESYFYLQVEFIDGET----LEDELAQ
86606530     EAEVLERLG-EHSQIPKLYAHF-----QEGGKFYLQVEFIEGIT----LAQEMRR
113476860    EAGVLYKLRH--PQIPGFREMFYKYL-----NAEGYLFLVQDYIKGKTYRALLNRLKQ
17131504     EAKVLHQLQH--PQIPRFREIFRVNL-----AGKEYLFLVQDYVEGETYSGLLNHRIQQ
17131503     EANVLKQLQH--SQIPRFHGSLSQAQI-----GTKDFFFLVQDYVEGDNYLQLEQRQSQ
113474330    EAETLYKLGSDSDQIPRLLAHFQE-----EKEFYLVQVEYIEGQD----ISRELTP
113474331    EAETLYKLGSDSDQIPRLLAHFQE-----EKEFYLVQVEYIEGQD----ISRELTP
113474332    EAEALYRLGTDSQIPRLLAHFQE-----EKEFYLVQVEYIEGQN----ISQELAP
17131426     EAELLHKLGT-HDQIPQLLAFHFE-----HQEFFLVQVEYIEGHP----LSDELTP
17132907     EAQVLYKLG-CDRIPQLLAFHFE-----DAEFYLVQVEYIEGHP----LSKELTP
17133975     EAQSLEKLG-YQQIPQLLAFHFE-----EAEFYLVQVEYIEGHP----LNQELPS
37521121     EAETLERIGH-HDQIPRLLAFHFE-----DEEFYLVQVEYIEGHV----LATELQP
86606961     EAKVLNRLNN-YDRVPRLLAHFQE-----DQEFYLVVEEYIAGHD----LTHELVD
22299003     EAQILERLGT-HDQIPRLLAFHFE-----DNEFYLVQVEYIEGQV----LRQELLL
17133132     EAAILEELGGATEQIPALYAYFSA-----DGQFYLVQVEWVEGDT----LTGRLQQ
17133502     EAAILEDLGSYSQIPTLYAYFQS-----NTQFYVQVEWVEGDT----LTAKLKQ
17133504     EAATLEFLGEHSNQIPRLYAYFSE-----NGQFYLVQVEWIHGHT----LRQLLVS
17132363     EAKTLGTIGN-HPQVPRLLDYFEE-----QEQFYLVQVEYISGST----LQOEVKL
22298869     EATTLGKVG-HPQLPRLLYLEN-----ENEFYLIQVEYVGGTL----LQOEVKR
17130658     EAKTLATLGS-HSQIPMLLN YFEG-----DGELYLVQVEYVRYGT----LAQEVVRH
113474678    EAIRLDELGQ-HPQIPELMAHFQ-----GEQQYLVQVEYIDGQN----LEQELVA
113477154    EAVRLDELGK-HPQIPELLAHFE-----DNYQYLVQVEYIDGSN----LAQESIK
113474087    EALQDLKLGK-HPQIPSLLYFFV-----SSYKYLQVEYIQGKN----LAQELKE
17130683     EAFRLYELGENHTQIPRLLAFHFE-----GSSLYLVQVEYIKGLT----LLQEVQQ
** * :           ::: :           :           ::::: *           :
```

1652588 HGPLSEAEVRWVLTEMLKILSFVHGTGAIHRDIKPSNLMRDQ-----EGKLYLL  
22299975 QGCFSEEEVRQVRELLPVLYVHERGSIHRDIKLSNIMRQHPSKTKF---PGQGRLYLL  
86606530 NGPFSEEQARQVMQEVLLILSYVHSHNTVHRDIKPANLIRRKE-----DGRLVLI  
113476860 GKLFQEAQAEVIKFLQLLPVLEYIHNLGVIHRDISPDNIILOTS-----DKLPVLI  
17131504 GLRFTEAEIROLLOQILPVLDIHSLGVIHRDISPDNIIILRSV-----DKLPVLI  
17131503 GKTFTTEEVITLLRQTLPIIYIHSQNTVHRDISPDNIIILRRS-----DNLPVLI  
113474330 GKKLESDTIALKLGILEALVVAHENNIHRDIKPNLMRRGS-----DNKVILI  
113474331 GKKLESDTIALKLGILEALVVAHENNIHRDIKPNLMRRGS-----DNKVILI  
113474332 GKKLESDTIALKLGILEALVVAHENNIHRDIKPNLMRRGS-----DNKVILI  
17131426 GKRLSEPTYIALLKNILOPLAFVHQNNVIHRDIKPPNLIIRRS-----DGKVVLI  
17132907 GKVFTQDEVTILLQEILTILEFVHQNVHRDIKPNLRRLRQ-----DGKLVLI  
17133975 GRSISEAETVAIIREILEILVFVHENGVIHRDIKPSNIIRRS-----DRKLVLI  
37521121 DAPMGEARVAAMLQDVLSTLAFVHSQGVHRDVKPDNLIIRRS-----DGKLVLI  
86606961 GKPLSEPEVVQLLWEVLEILRHVHAHQILHRDIKPANLMRRDF-----DGKLVLI  
22299003 GSGWPEARVIELLDALGILSFVHQCQGVHRDIKPDNLIIRRF-----DQRLVLI  
17133132 QGLFTESAIQELLVNLVLEYPVHSHKHIVHRDIKPDNIIILRHR-----DGKPVLI  
17133502 QGVLSESAVRDILINLLPVLEYPVHSHKHIVHRDIKPDNIIILRHR-----DGKPVLI  
17133504 QGIQEGEIVKTILLSLLSVLDYVHSHKHIVHRDIKPDNIIILRDF-----DQKPVLI  
17132363 NGTLSEPGVKQFLSEILPLLOYIHEHKVIHRDIKPANLIRRSQ-----DARMVLI  
22298869 FGPKESEEVKQVLEQVLPILDYLVHSHKHIVHRDIKPANLIRRI-----DKKLVLI  
17130658 HGTKTEAEVKQFLQELLPILOLYQNVHRDIKPNIVRCAD-----DRRIVLI  
113474678 NGTFTENQIQELLWDLVLEFVHERQVHRDIKPENIIRNSITLPGGGENKQQLVLV  
113477154 NGPFDSNQIQOMLNELLVPLKFIHEQKVIHRDLKPENIICRSSTPETIGWMTNTNKLVLV  
113474087 QGTFDEQKIRKFLKEILPVLQFIHKNQVHRDIKPENIIRRGADKTGYGWGDN---LCLV  
17130683 E-PFNEEKIRQLLIDLLPVLDFVHFHVIHRDIKPENIIRRDGDGK-----LVLII  
. : \* \* : :\*\*\*. \*\*: \*

1652588 DFGAVKQATAGVGASNEG-----STGIYSMGFAPPEQMAGNQVYPATDLYALAVTC  
22299975 DFGAVKQVSQTSMESR-----STGIYTAHYAPPEQIRGEQVFPSSDLYALAVTC  
86606530 DFGAVKQLGPGHTLSEE-----GTAIRSLGFSPPEQMAGQAVGPASDLYALAATC  
113476860 DFGGVKEIATKVASEYAO---LES---GITRLGKLGYPPEQMRLGVINNDSDLYALAVTA  
17131504 DFGGVKQVVAVVASQYYPGVVASPPAATLLGKVGFPPEQMOTGNVSPHSDLYALAVTA  
17131503 DFGGVKQLPASQGFWSTK---LAG---NNTLLGKKGYAPEEQLRQGVF INSDLYSLAVTA  
113474330 DFGAVKEISTLTITQ-----QGATTLTVAVGTPGYIPSEQSN-GKPKLSSDIYAVGMVG  
113474331 DFGAVKEISILTIAP-----QGATTLTVAVGTPGYIPSEQSN-GKPKLSSDIYAVGMVG  
113474332 DFGAVKEISTLTIAI-----QGATTLTVAVGTPGYIPSEQSN-GKPKLSSDIYAVGMVG  
17131426 DFGAVKQIGTQVNG-----EGVTKMTVSI GTAGYMPSEQSR-GSPRLSSDVYAVGMIG  
17132907 DFGAVKQITITQIVTP-----TGENKSTVIGTIPGYIPGEQAQ-GNPKFSSDIYAVGIVA  
17133975 DFGAVKEISLPQTDN-----QEPIPFITIGITKGYAPSEQCF-GRPQNSDIYAVGMIG  
37521121 DFGAVKTVWSRPAALPGGQ---RGTVAGTIIGTPGYMSTEQGR-GKPRPSSDIYALGMIG  
86606961 DFGAVKEVGRVLSHA-----PGQTQVATVIGSVGYIAPEQLG-GKQPCCSDIYVGVLA  
22299003 DFGAVKEMGVSIGGG-TLV---GDANPQTIAIGTPGYMAPEQAQ-GRPRPASDLYSLGMVA  
17133132 DFGAVRESMGTVVNS-----QGNPTSSIVIGTPGYMPSEQAA-GRPVYSSDLYSLGLTA  
17133502 DFGAVRESMGTVINS-----QGNPTSSIVIGTPGYMPSEQAA-GRPVYSSDLYSLGLTA  
17133504 DFGAVKETIRSVVSS-----PGYATRSVIGTPGYMPSEQAV-GRPVYATDIYSLGLTA  
17132363 DFGAVKNQVSQAITN-QSA---N-TALTAYAIGTPGFAPPEQMA-MRPVYASDIYALGIVC  
22298869 DFGAVKDKVTQAMVE-NAP---ELSTFTSFVAVGTPMYAPPEQMA-MRPVYASDIYALGVTC  
17130658 DFGAVKEKLSDLGIS-SFN---Q-NSHTNF-VGTTGFAPPEQFS-LRPVYASDIYALGMTC  
113474678 DFGASKVITNSSLGK-----TGMTIGSAGYVAPEQLA-GKAAPASDFYSLGVTC  
113477154 DFGAAKVTGTSLMQ-----PGTIIGSPEYVAPEQLR-GHAIFASDIYSLGVTC  
113474087 GFGSAKAISIHPTVK-----TDTIIGSPEYTAPEQLM-GKPVFASDIYSLGIVC  
17130683 DFGGAKQVTQTSIAR-----QATAIYTLGYAPTEQMA-GFACHASDLYALGVTC  
. \*\* . : . : . \*\* :\*.\*\*\*.

1652588 LYLLTGKTAQ-----DLY-DAYHNQWNWRSPGLK---VSQPLADVIDRLLLPKPD  
22299975 IVLLTGKDPE-----KLF-DAYNNRWNWHSYVPS---VSQQLQQILDRMLQAPPSD  
86606530 LNLMTLESPA-----KFY-DHNTGQWDWSDR-LQ---LSPEFDAILRRMLHPVISQ  
113476860 LVLLTGKEPS-----LLT-DVHNLTFNWRIEIS-----ISENLGNVLDKMLASKPSD  
17131504 VVLLTGKQPQ-----ELL-DTYNLSWNWQREIS-----LSPILGQVLDKMLAARPGD  
17131503 LVLLTGKEPQ-----KLY-DSYQGVWRWGKEIN-----ASIQLESVLKRMALAYKPGD  
113474330 IKALTGKDPQ-----SLPTDPKTGNI IWRNKAEE-----VSNLANVLDKMLVREYFSE  
113474331 IKALTGKDPQ-----NLPTDPNTGNI IWRNEAE-----VSNLANVLDKMLVDRDHFSE  
113474332 IKALTGKDPQ-----NLPTDPNTGNI IWRNEAE-----VSNLANVLDKMLVDRDHFSE  
17131426 IQALTGLMPH-----QLQEDIQTAEI IWRELVO-----VSPSLADVLDKMLVRYDFRQ

17132907 IQALTGLLPH-----QLEHDADTHEIIWQNHAQ-----VSSEFARFIDKMVCYDFRQ  
17133975 IKALTGISPH-----DLPRDENE-EIKWSDKAL-----VSQGFAQILSKMVREDFKQ  
37521121 IQALTGLNPM-----ELPEDSRTGEPLWQDNAQ-----ASPGLCAILSKMVSYHFKD  
86606961 IQALTGRPPT-----KIRDDPRTGQLLWRDLVP-----VSKELAEIVDRMICPRWQE  
22299003 VQALTGLSPL-----QLSQNPYG-CWCWQATEP-----VSDRLVQFVNKLIHPSPYE  
17133132 IYLLTGROPO-----TLEIDSQTGEIMWROYASQ-----MNPILASVLDKAIAYHPRD  
17133502 IYLLTGKQPO-----ELETEPHSGEIIWHRYALN-----ISPTLAAVIDRAIAYHPRE  
17133504 IYLLTGKSPE-----ELPTHPTGEILWQNMAPH-----VSQQLVSVLNQAIKPHAGD  
17132363 VYLLTSKTPK-----DLDYNPTTGEVMWEHLVQ-----ASDHGIVLRKMLEVSVRS  
22298869 VYLLTGKSPK-----EIERDPRTGEWHWQRHVKN-----ISPQFAALLNKMLQDAVKD  
17130658 IYLLTGKGPL-----EMESDKTGEICWYNYVK-----VSDDFAKII SKMVKFSLDE  
113474678 IYLLTQVAP-----FELFDVLEGOVWRQYLQSN-----ISEDLGRVIDQLLAPNINE  
113477154 IYLLTQISP-----FDLFDVMADKWVWRDYLQNP-----FNSKLGKVIDKMLMTNPQI  
113474087 IQLMTQLNP-----FDLR--YGEFFLWQOHLPRP-----VSKSLSNIINKMLQVSLSE  
17130683 VRLLTQCLPQQNLYGHIDDGLYDPMNGKWLWQEYLODRGITISENLSQILDKLLKHLPS

: :\* . \* . : . : :

1652588 RYASAEVLAVL---  
22299975 RYQSAAQVLADL---  
86606530 RFATATEALRAL---  
113476860 RFSTARQVITAL---  
17131504 RYQSAQQVLHAL---  
17131503 RYQNAAQILTDL---  
113474330 RYQNAMEAMEAL---  
113474331 RYKNAME(TM)-----  
113474332 RYKNAMEAMEAL---  
17131426 RYQSAVEALATV---  
17132907 RYAAAT TALQAL---  
17133975 RYQSALAVLAAL---  
37521121 RYQTAHEALEALQHL  
86606961 RFQSAAEVMEAL---  
22299003 RFATAADALAGL---  
17133132 RYATARAMLDNL---  
17133502 RFTTAREMLEALQL-  
17133504 RYSTASKMLYAL---  
17132363 RYQSATDVLKAL---  
22298869 RYQTAMDVLADLQL-  
17130658 RFQKPQDVIKAL---  
113474678 RYQFVEQVLKEL---  
113477154 RYQSALEVMKEL---  
113474087 RYHSIEEVLKDL---  
17130683 RYQSAAEVLHDL---

\*: :

Cluster No. 68 multiple sequence alignment

CLUSTAL 2.0.10 multiple sequence alignment

```

116621584   YAIVDSL GAGGMGEVYRARDSRLQRTVAIKIISP ARFADDGHKRRFLQEARAASAL THSG
116622694   YLVVERLGQGGMGVYKARDSHLDRFVALKVLPPERVADPERKRRFVQEAKAASALNHPN
116621572   YQVTERLGSGGMGEIFKARDPRLNRTVAIKALSIEGMGDPDRRRRFIQEAQAASGLNHPN
116621573   YQVIEKLGAGGMGEIWK AQDARLNRMVAIKVLTNANAGSDRRRRRFIQEAQAASALNHPN
116625897   FGLLEKIGEGMGQVYKARDTRLERFVAVKVLSDSRLADPGSRSRFTQEAKAASALNHPN
29830915    YRLTGR LGRGGMAEVFAAEDVRLGRTVAVKLLRSDLAEDPVSKARFTREAQSVAGLNHHA
108757908   YQLEQLLGE GSMGRV FQARHTRLGRQVALKVL RPEHARDGGFVRRRFQEARTVNQINHEH
86160512    YELTGH L ATGGMGAVFQARHVHLR KDLAVKVL RPELSASPDLVERFRREAEIASALQHDH
86742862    YEVTAM LGHGHA VVLAGRHRLGRTVAIKVLS-TSAADGGAHGRFLAEARLLAGLDHPH
: :      :. * . . :   ... :* : : ** * :

```

```

116621584   IVTIYDIGA----EGSIDYIAMELVEGVTL D KACAR----PYSEKLALAA S L A S A I A A A H
116622694   I I H I Y D I A K ----D G D I D Y I A M E L I E G R T L A S V I G Q R G L - R T E Q I L K Y G T Q V A D A L A K S H
116621572   I I T I H D I I S ----D S E N E Y M V M E Y V S G K T L S E L I Q A G G V - G V E K T L R Y G V Q M A D A L A A A H
116621573   I I T I Y D I T S ----D E E S E Y M V M E Y V A G K T L A D L I P A G G L - G V A K T L Q Y S V Q M A D A L R A A H
116625897   I I V V H E I G E ----H D R Q I Y I V M E L V D G K P L S Q L I P K K G M - R L T E A L H I A V E I A D A L A A A H
29830915    V V A V Y D S G E D V V G H S T V P Y I V M E L V E G R T I R D L L L N A E A P G P E Q A L I I V S G V L E A L A Y S H
108757908   I V E I F D F V D E - S A M G G H V Y C V M E L L R G Q S L S S - L A Q A E P L T L A R I Q R F V V Q V C A A L G A A H
86160512    I V H V T D F G --R T E E G W L F L A M E L L T G E S L F D R L R R E G A L A P A A A V P V L W Q I C A G L G A A H
86742862    V V R I Y D Y V E ----S G D L C L L V M E R L A G G T V R A --R A A N G L T V D V V C A I G L A T A A A L E C A H
: : : :      . ** : * : :      : : : *

```

```

116621584   E K G I V H R D L K P A N I M V T A A G ----Q I K I L D F G L A K F N A P V L K G - D E S T R T A V S ---L T A E
116622694   G A G V I H R D L K P T N I M V T D A G ----L I K V L D F G L A K L A D N A T D E - F A P T R T V R A D E I H T E D
116621572   A A G I V H R D L K P G N V M V T E S G ----L V K I L D F G L A K V S M A T Q L T --E E T Q T L G --A P M T V E
116621573   V A G I V H R D L K P G N V M V T D S G ----L V K I L D F G L A K V S M A T K L T --E E T Q T M G A - A P M T V E
116625897   A A G I V H R D L K P A N L M V D R L G ----R A K V L D F G L A K M T A S A A V A T D E E T R T L A V T Q L Q T E E
29830915    Q H G I V H R D I K P A N V I I T H N G ----A V K V M D F G I A R A L H G A Q S T -----M T Q T
108757908   Q V G V V H R D V K P D N L F V I H R A G Q P D F V K V L D F G V A K L L T A E G S T -----T G T V D
86160512    A M G V V H R D L K P E N V F L A R T A S G R E V A K I L D F G I A K M T D P S - S G -----C A T Q A
86742862    A G G I L H R D I K P D N I L F S A D G ----L L K V T D F G I A K L I G A S -----G A A P
* : : * * : * : .      * : * * * : * :      :

```

```

116621584   G T V A G T P A Y M S P E Q V Q R P A E S R S D V F S L G A V L Y E L F T G R R A F Q - G D S T V A V M A A V L E R D
116622694   G T V M G T L A Y M S P E Q A Q G K Q V D G R S D I F S L G A V L Y E M A A G R S A F W - R D S R A S T M A A I L R D D
116621572   G S I L G T V S Y M S P E Q A Q G A K V D A R S D I F A F G A L M Y E M I T G T K A F S - G A S P I A T L T A I L R D E
116621573   G S I L G T V A Y M S P E Q A Q G K R V D A R G D I F S F G V V M Y E M L T G T K A F A - H D S A I T T L T A I L R D E
116625897   G V I M G S I P Y M S P E Q A E G R P V D A R S D I F S F G A V L Y E M I T G R R A F G - G E S R V S T L A A V V E K D
29830915    G M V M G T P Q Y L S P E Q A L G K A V D H R S D L Y A T G C L L Y E L L A L R P P F T - G E T P L S V V Y Q H V Q D I
108757908   G T I I G T P A Y M A P E Q A A G L P V D A R S D I Y A V G N I L Y E L I S G K P P F Q - A P A F G H L V V Q I I T Q P
86160512    G M V V G T P E Y L A P E Q A T G G A V D A R A D L Y A V G L I A W R M L A G H H P F T - A P D A R G L L M K Q A T A P
86742862    S T L V G T P V Y M A P E Q F D G R P P G P A C D L Y A L G I V L Y E L L S G R P P F V R A L S M A Q L M D H H L R V A
. : * : * : * * * * *      * : : * : : : : . *      :

```

```

116621584   P P N A S N I C P T L P R ---G C A A A I H R A L A K K P E A R Y P S M H E F -----
116622694   P V P L P ---A E V G A ---G L R G V I G R C L V K E P S E R Y Q Q A T E V R A A L -----
116621572   V K P V R D S V T D C P P ---E L E E I I G R S L R K A P G D R W Q S M Q E V -----
116621573   V K P V G E L V A G V P A ---E V V E I I A L A L K K D P K D R W Q S M Q V V H K V -----
116625897   P V P P S E I A A G T P P ---E L E R L I A R C L R K E V G R R S Q S M A D V -----
29830915    P V P P S E V A E G A P P ---E L D G L V M R S L A K D P D D R F Q T A E E M R G L V -----
108757908   P P P L P S H L P S G E P V P P Q L A E L V M R C L S K E P E A R P Q S L T E V T T S L L L -----
86160512    V P P L A E A R P E L A A W P - A L V A V V A R A C E K E P G A R P A S A A E L G E A L -----
86742862    P Q P L D A A P P -----A I A A V V D R A L R K E P G A R P P S A R A F A L D L A A A T A H A L G A G W L

```

: . \* \* .

Cluster No. 69 multiple sequence alignment

CLUSTAL 2.0.10 multiple sequence alignment

```
108762298 YEVLSVLGKGGMAEVYRARVLSGPREGWTVALKRLLPALTRDPE----SVSLFAREAQLS
108762839 FQLLSRLGRGGMAEVFLARMQQOPHAGAQVALKRVRPERLRDAE----AHEQLLHEAELA
86157474 FRIQGLIGRGGMAEVFRAVALEGPLAGQTVALKRRLPELARDPG----FVALFEREAAVT
86157561 FLLLDRIAVGGMAEVYVAIR-RGEAAGRLYALKRILPTLAEDAE----FITMFLDEARLV
117927230 YELGELIGYGGMAEVRRGRD---LRLGRDVAIKTLRVDLARDTS----FQTRFRREAQAA
119714294 YQLGELLGRGGMAEVRKGTD---TRLGRVAVKRLRTDLASDAT----FQARFRREAQSA
119962857 YELGELIGRGGMADVYRGTD---TLLGRTIAVKVLRADLARDPQ----FQARFKREAQAV
54023701 YRIDAPIARGGMSMVFVFRGVD---TRLDRPVAIKVMDPKFAGDPQ----FLTRFELEARTV
86741763 YTAQERLAVGGMATVYVAHD---NRLDRLVALKVMHPTLNHDPE----FVTRFHREAKAV
134097469 YELRDEIGSGMGSVWRAFD---GVLDRVAVKRISPETIAASTAIDVLAQRFQREARVT
114798457 WRIDGIIGRGGMGTVYRVRR-ADGLYEQEAALKLMRPLAPEHLA-----LFESERQFL
: . . * . * * : * :
```

```
108762298 QQLHHPNIVTVLDAGALE-----GIYFIVMELVDGRDLGQILRRCKVIRGIPPLDF
108762839 RCLRHPYIVGFVEYGELP-----DGGYLALVELVEGPDGRVLRARRRRIELPIDI
86157474 RRLRHPGIVEVLETGVAS-----GAPVIVMEYVDGRNLKEILARCAERGILLPVDF
86157561 VQLDHPAIVPIHELGMHG-----EGYYIAMDYLPKDKLRALLDRLRARGEPMVPL
117927230 AALNHPNIVAVYDTG-ESMLDG---VPVPYIVMEYVEGRTLRDILKSES----HILPRR
119714294 ASLNHPNIVAVYDTGEEPAADGSG--ISQPYIVMEFVAGRTLRDILREGR----KILPER
119962857 AALNHPNIVAVYDTGGEYSVPGGPGEDVRVPYIVMEYVAGRTLRDMIKAN-----ELGVED
54023701 ARLKHPNIVAVYDQGVV---G-----EHPFLIMELVEGGTLRELLRERG----PMPPHA
86741763 ARLNTPRVVSIIDQGS DHIPAG-----LVNYLVMELVVRGRSLRQHLGARG----RLPVTE
134097469 ARIQHGVVQVYDAGLDEN-----ADELFLVMELVVRGVSRAFI SPGE----PLPVSW
114798457 ARLEHPGIARLLDGGGGAD-----GRPVMVMEYASGAPVDVWARQTG-----AGPRE
: : . : * : : * :
```

```
108762298 AVYLGKVLLEALAYAHSATGPQGERLGVHCDVSPSNLFI SRV-GEIKLGDFGVSRVLDV
108762839 SVLIVRQVLEALSHAHAVSTTGRPLGVVHCDVSPHNVLVLSRT-GEVKLADFGVARSRAG
86157474 AAYAAQVLAELALAHAGVDAAGAPLGVHCDVSPSNVFSRL-GEIKLGDFGVALTPGA
86157561 AAHVAARVADALDHAHRKRDALGTPLRVVHRDVSPANVLLGFD-GSVRIIDFGIAQAALR
117927230 ALEIVADILAALAYSHRN-----GIVHRDIKPGNIMLTHN-GEVKVMDFGIARAVAQ
119714294 ALEITSGVLSALDYSHRA-----GIIHRDIKPGNVMLTPS-GDVKVMDFGIARAI SD
119962857 SVGF TGLV LGALEYSHRA-----GIVHRDIKPANVMVCADTGDVKVMDFGIARAMAD
54023701 VRAVAEPVLAAGVVAHAD-----GLVHRDIKPENVLISDS-GEVKIADFGLVRAVAA
86741763 AIEIIEPVIEALAAAHAA-----GIIHRDIKPENILLGDD-GQVKVADFGIARPVSQ
134097469 AAFAAAQICTVLSHAHAV-----PVVHRDLKPGNVLVTTD-GAIKVLDFGIAAILRS
114798457 ILGAMLQVCEAMVHAHGK-----LIVHRDIKPSNILIDET-GRARVIDFGVARIAGG
: . : * : : * * : * * : * * :
```

```
108762298 GKLOGGEV---LGKPYLSPESLLGE-VNPEADLWAATVVLYELLTLERPFPTGTP--DA
108762839 -AVQDIRR---LGKQHYRSPPELLAGD-VSVAVDLWATAVLLYELLALLESFPFSGPE--EQ
86157474 AGAPGPGA---LGKVQYLSPEQLRGERPTPACDLFALGAVLFELLTDRPAFPGRDV--NE
86157561 TRRQDTVL---RGKFGYMSPEMVRGQPVDRSDVFSLGVVLHEMLTGARLFSGKSE--LS
117927230 STATVTQTAAVIGTAQYLSPEQARGEVDPDRSDIYSTGCVLYELLTGTPTPFTGESA--VA
119714294 ASSTMTQTAAVVGTAQYLSPEQARGETVDSRSDVYSAGCLLYELLTGRPPFVGDSP--VA
119962857 SAATMTQTQAVVGTAQYLSPEQARGETVDARS DLYSAGCLLFELLTSRPPFVIGDSP--VS
54023701 AN-TTSAS-VILGTAAYLSPEQVTAGSADARS DVYAFGILIFELLTGRVPFTGDNS--LS
86741763 PTQALTGG-VVMGTVGYLAPEQVTHGVADTRSDVYAAGVVLFEESLTGQLPHSGATP--MS
134097469 DVTPLTATGERLGT SQYMSPEQVRGDRVTPHSDLYSLGCVLYELLSSGYPVFEGEYG--AQ
114798457 DGIHVAPL-----SLDYAAPELFSGEAATTASDVYGLAATLYALLAGRPPALSDAPVPT
. * : * * * : * : * :
```

```
108762298 VFNAIRARQYRPLRELRP-----DIPEALEAVVARAFAERPEDRFPTAEFFAQAL
108762839 VESSIRGGRVTPVRMRVP-----GVPDALALVLDRALAPVPSORFGSAEQFARAL
86157474 VGRRILAGEARAPSSLRP-----EVPAALDALVLRCLARDAARRPASAAAAAAEI
```

86157561 VLERVRRRAEVPPPSRARP-----GLPPELDAIVLRALARDPAQRFEWASDLRDAL  
117927230 VAYQHVREDPVPPSRLNP-----DVTPDIDAIVMKALAKNPANRYQSAAEMRADI  
119714294 VAYQHVREPAVPPSDHDT-----ELPPEIDAIVMKALAKRVEDRYQSAAAMRSDI  
119962857 VAYQHVRETPDLASAHNP-----EVSEALDSVLVKALQKSRTDRFQDAAAFRRAL  
54023701 VAYQRVEKDVPSPGQFIA-----GVPPEFDELVARATAREPAHRFADANEMVAEL  
86741763 VAYQSVHGDVPAPSTMIE-----GIPAELDGLVLRATARDPARRPVDGAALLAEL  
134097469 QMYRHVEVAPCPLRDVRT-----EVPAELDRLVLDLLAKSPDQRPVDAYEVYEQ  
114798457 LARRAVEEVPPPLSAHIPKKDQTALIRDLDAILAKALARNPADRYPAVEAF-----

: : :: \*

Cluster No. 70 multiple sequence alignment

CLUSTAL 2.0.10 multiple sequence alignment

```

13092968      YLLKAKIGNGGTATVYRGV-----DIR--LDRPVAVKVMD-SRYTGDE----QLLT
111018124     YRVDATIARGGMSTVYRGL-----DTR--LDRPVAIKVMD-PQFAADP----AFVT
19553377      YRIETPIARGGMSTVYRCL-----DLR--LGRSMALKVME-EDFVDDP----IFRQ
23493912      YRIETPIARGGMSTVYRCI-----DLR--LGRSVAVKVMD-AAYVNDP----VFRQ
38234190      YRIEAPIARGGMSTVYRCV-----DTR--LGRLVAAKVMD-QRYLDDP----IFKD
91787132      YDLIRVLGKGMGLVYEGR-----DPN--LDRRVAIKTIK-VENLSEEEAA-DYEV
94971484      YQLLAEIGRGAMGTVYQAL-----DPE--IDRLVAIKTFS-AFDSTSHEGV-AFRD
111019572     YQLRALLGRGGMGEVYEF-----DTV--KGRTVAVKLLD-LELANDATFQ----Q
126435989     YELRSLIGVGGMGEVYRAY-----DTV--KGRTVALKLLR-AEMAADPSFQ----E
21225517      YLLERIGRGGMGEVWRAR-----DES--LGRRIAVKCLKPLGTQHDHSFTRVLRE
29827806      YRLLDLIGRGGMGEVWRAR-----DES--LGRQVAVKCLKPLSTHHDQSFTVLRE
86743110      YRLNGRIAAGGMGEVWRGL-----DLT--LGRPVAVKLLR-PEYASDESFL----V
124268135     YALKYRIGDGLGTVYAAD-----DPL--LSRRVAIKTLNLMMPAGARTPLETDARE
86159869      FELLREIGRGGFGLVFEAR-----DRE--LGRLVAFKAMRPSRAEP-AALEKPLRE
108758255     YVLKALLASGGHGSVYEA-----HRI--LGRRAAVKVLH-PHLADQGEML----K
108763488     YELRSRIGVGGMGLVYEGI-----QPL--IGKRVAVKVLH-PELAHSTEQV----E
108759164     YRLVRRLGAGGMGTVYLGE-----QTR--IGARVAVKVLH-PHLGRDESLR----A
108760510     FRILRRLGQGGMGSVYLA-----QVG--IGQQVAMKFLN-SGLSMDPDVA----R
116619999     YRIISSIGLGGMGSVYLA-----RADGEIQORVAIKLLR-ADG-HRPEWR----E
32474038      FEVIREIGRGGMGIVYEA-----QLS--LERIVALKILPRSITLDQKQVA----
32476260      YQLLKVLGVGGMGVYLA-----QRE--LDRLVAVKMIRSGILAGQDEVK----
32473866      YQVLRRLGSGGMADVAAK-----HLK--LRRDAALKVLRRTPTQSQEDLQ----
108758216     YRLRQRIGVGGMGTVYEA-----QLD--VGRTVAVKVLROHLLGEPAVHA----
108759500     YEIAGVLGRGGMGTVFLAN-----HLRLRGRQVAIKVLRHDAGMGAEAFV----
108762243     YRIVSLLGRGGMGSVYLAQ-----HLRLPGKQVAVKVLRRGGDHLTPEIFA----
116625893     YRIVSKLGEggmgavyrat-----DTKLNREVAIKVLPDALANDPDYLA----
116626707     FEIVERLGEggmgavylak-----DRHLDRDVALKVLLPEAVGNADRRR----
29831643      YLLEEPLGRGATGTVWRARQRETAGAEAAVAGQPGETVAIKVLKEELASDADVMM----
32476268      FELGAVLGVGTVGTVDGKILDDVEVHPAAEAIRGQDLAVKKLHPAVSQDDLIQA----
: :      :. * . *:                               * * :

```

```

13092968      RFQL----EARSVARLKDPGLVAVYDQGDID-----ARHPFLVMELIEGGTLRELLAE-RG
111018124     RFEF----EARSVARLKHPSLVAVYDQGDH-----REHAFLVMELVDGGTLRELLRE-RG
19553377      RFRR----EARSMAQLNHPNLVNVYDFSAT-----DGLVYLVMEELITGGTLRELLAE-RG
23493912      RFRR----EARSMAQLSHPNLVNVYDFSSS-----GDHAFIVMELITGGTLRELLAE-RG
38234190      RFRR----EARSMAQLSHPCLVGVYDFSSD-----GDNIFLIMELITGGTLRELLAE-RG
91787132      RFRT----EARSAAARLQHPNIVSVYDSDRD-----GDMAYLVMEFIHGDDLKHHMDQ-GK
94971484      RFAQ----EARAAGRLAHPGIVAIYDRGEEPS---TGSPYIVMEYIAGQPLSRLLAQSGG
111019572     RFRR----ESHVAARLQEPHVIPIHDWGEID-----GVLYIDMRLVPGQDLRSLLRSQG-
126435989     RFRR----ESRVAARLQEPHVIPVHDFGDIG-----GVLYIDMRLVEGASLKDVLQAGG-
21225517      RFRR----EARVAAALQHRGVTVVHDFGEWD-----GVLFLVMELLEGNLDSRLLEDNKG
29827806      RFRR----EARVAAALQHRGVTVVHDFGESD-----GVLFLVMELLEGRNLSQLLEDNKH
86743110      RFRG----EARHAARLSHPGVASVYDYGEVATADDPYPTAYLVMEELVEGEPLSAAHREK-
124268135     PFNAIFLHEARAAAHLSPHIVTVFDAGLSP-----QGAYIAMELLKKGKDLRALLSDGW-
86159869      -----EAEAAARLNHPNVVTLHDFGIHE-----GTPYLILELLRGETLQORLKRGR--
108758255     RFVR----EARVVNQIRHPNIVDVYDFGLMP-----DGSPYVMEELLTGRTLSQVVQERGR
108763488     RLLA----EARAVNAIRHRGIIDIFGFGQVP-----DGRQYIVMEYLEGQALDAVLTEKNR
108759164     RFYA----EARTVNVVGHPNIVHIFDINEAP-----GGIHYFVMEYLEGVPMSHLPRP---
108760510     RFLN----EAKSYARVAHPNAVTLHDFGQDE-----EGSLYISMEYVEGDDLKSLLAACGR
116619999     RFLK----ERQLLASLNHPVSVVHVIDAGHTQ-----DGRPFLVMEHVEG--LPIDQYAG-
32474038      RFIF----EAQAAGGLHHPNIVPIYGAGIEDG-----IHCYSMPLIRGRSLDEFIYT-DR

```

32476260 RFYT----EAKAAAKLKHPNIVAVHQFGRRAG-----HHFFSMQYVEGEDLQKVLAK-GP  
32473866 RFER----EAQAAACLNHPSIVQVYEIGDHQG-----THFIAQELIDGSNLKQCLQKSGQ  
108758216 RFRR----EAQATAGVKHPNIVEVMDFDHAPDE----PPFLVMELLLKGQTLKSLLLKKEGP  
108759500 RFRR----EAEIASKLGHPNIVEVLDDFSLED----GSPYVMMECLRGMPLSRRLR-KGP  
108762243 RFRR----EAEIASRLGHPNIVEVLDYDTLEN----GNPFLVLEYLRGESLQERLA-RGR  
116625893 RFER----EAQVLASLNHPNIAIIHGV-EDN-----ALVMELVPGQTLAELIA-SGP  
116626707 RFVR----EAKAASGLNHPNIVHIYDI-DESE----GELFIAMEYVAGKTLEQAID-RKG  
29831643 RFLR----ERSVLLRLTHPNIVRVRDL-VVEG----DLLALVMDLVDGPDLHRYLRENGP  
32476268 RFRR----EMVILERLQHPNIIIGYFGG-GSED----GQLFYVMERVDGGTIKDLLETNGA

\* : . : \* :

13092968 -PMPPHAVVAVLRPVLGGLAAAHRAGLVHRDVKPENILIS-----DDGDVKIADDFGLV  
111018124 -PMPPHAVAAGVAVPVLDAVAHRAGLVHRDVKPENILIS-----DGGEVKIADDFGLV  
19553377 -PMPPHAAVGMRGVLTGLAAAHRAAGMVHRDIKPDNVLIN-----SDHQVKLSDFGLV  
23493912 -PMPPHAAIGVMRGVLTGLTAAHRAAGMVHRDIKPDNVLIT-----RDHRVKLSDFGLV  
38234190 -PMPPHAAVAVMRSVLTGLSVAHSAGMVHRDIKPDNVLIN-----ADHQVKLADDFGLV  
91787132 -LYTLAQTLGIMGDLLSALDYAHRQSVVHRDIKPANLLIQ-----GNGHVKLTDFGVA  
94971484 -RLEERYALTIVKELAEALAYAHEKGVVHRDIKPANILIT-----EDGNPKIADDFGVA  
111019572 -PMDASRAVVIMEQIASALDAHADGLVHRDVKPENILVT-----ANDFAYLVDFGIA  
126435989 -PLDAKRAASIIAQVAAALDAHADGLVHRDVKPENVLLN-----PDDFAYLVDFGIA  
21225517 HPLPVADVVDIAEQVASALAYTHEQGI VHRDLKPANIVRT-----ADGTVKICDFGIA  
29827806 HPLPVADVVEIAEQVAAALAYTHQOGI VHRDLKPANIMRL-----ADGTVKICDFGIA  
86743110 -RLSPERTLDILGQAADALQAAHALGVVHRDVKPGNLLLR-----PDGAVKVTFDFGIA  
124268135 -RPTVGOAVLIIRRADALAYAHSKGIVHRDIKPANIFMV-----GRTQPKVLDFFGIA  
86159869 -RLQPEEAVRIARDVASGLVHAHARGVLRDLKPGNVFLT-----EAGGVKLLDFGLA  
108758255 --LSSTRALAYLEPVCGALEAAHRAAGVHRDLKASNILVVEEGE---RPR-VKLLDFGIA  
108763488 --LPVQEALALLDEVLAALAAAHGAGVHRDLKPSNIFLVQQPD---GSRYVKVLDFFGLA  
108759164 --MVPATLVSLLAQACDALDAHRCGVVHRDLKPDNLFVVRHAG---EPPSLRVLDFFGVA  
108760510 --LALDEAVDIVLQVADVLAHARQVIHRDLKPENIMVR-QGM---RGWHVKVLDFFGIA  
116619999 --IAVANRLKLFVRVCDVAVSHHRHLIIHRDLKPNILVD-STG---Q---PKLLDFGIA  
32474038 --PEVEDAIRWALQVANAIIDAHRYGVIHRDIKPSNLIVDQDG-----KIWVTFDFGLA  
32476260 --LPSRRAAEIVRDVAHAIIHHAHARGVLRDLKPGNVLIDPSG-----QVHVTFDFGLA  
32473866 --FTAKEGIEILRCVTEALVVAHAARVTHRDIKPENIMRSGDG-----AIKVTFDFGLA  
108758216 --LPVERAAAIHQVANALVVAHQAGVVHRDIKPDNIFLVDTGT---EALHVKLLDFGVA  
108759500 --MTLEEVFSCARQMGSAALQAAHRAAGVHRDLKPGNVFLVPTTEVGGVMMEHVKLLDFGIS  
108762243 --LPMEDVVSFTROMGSALQAAHRAAGVHRDLKPANVFLVPTDSGGVVGGERVKLLDFGIS  
116625893 --VPLEEALGIARQIAEALAAHEKGVVHRDLKPANVKTPEG-----VVKVLDFFGLA  
116626707 --LTLREALRYAVPMADALAKAHAAGVHRDFKPSNVMITGER-----TVKVLDFFGLA  
29831643 --FTPVAALLTAQVADALAAASHAGVHRDLKPANVLLKQDGG----QMHPMLTFDFGIA  
32476268 --LAWPVVVDVARQVCSALQCAHNHGVIHRDLKPGNLFLLTRD-----AHVKLGDFGIA

: : \* : \* \* . \* \* : : \* \* :

13092968 RAVAAA-----GITSTSVILGTVAYLSPEQVRDGD--ASPRSDVYSAGIM  
111018124 RAAAAS-----TTTNSVILGTAAAYLSPEQVTSGI--ADTRSDVYSTGVL  
19553377 RAAHAG-----QSQDN-QIVGTVAYLSPEQVEGGE--IGPASDVYSAGIV  
23493912 RAASAG-----QSRDD-KIVGTVAYLSPEQVEGTE--IGPASDVYSAGIV  
38234190 RAASAS-----QATSN-QIVGTVSYLSPEQVSGDD--IGPESDVYSAGIV  
91787132 RIQDSSD-----ATRTRGTMVGTLYKMSPEQVQGRP--IDARADLFAAGIV  
94971484 RIDAST-----MTFHGQLLGTTPAYMSPEQLTGGL--VDGRSDLFSLGVI  
111019572 HSSSDL-----RLTTLGSAVGSYAYMAPERFDNAP--VDGRADVYSLACV  
126435989 HTGGDP-----GVTSTGMIVGSSAYMAPERFSGGP--VGPPADVYSLTCL  
21225517 RLGHDAFTA-----RLTGTGIAMGTPHYMSPEQIGGDE--VDRRSDLYSLGCV  
29827806 RLGHDIGFTA-----RLTGTGIAMGTPHYMSPEQISGSP--VDQRSDLYSFGCV  
86743110 RAVDAA-----PLTATGIMMGTAYVVSPEQASGRP--VTPASDVYSLGVV  
124268135 SVAHAR-----DSGAVGGS PHYMAPEQVRNEP--TDRRTDVFSLGVV  
86159869 ---RLL-----DRASLAGGTPAYMAPEQLRGE--GDARADVFSAGVV  
108758255 KLLHAEPSQE-----GLTIAGQRLGTAHAMAPEQFRGGP--IGPHTDIYALGVL  
108763488 KRGQGPTGRT-----AQTRTDMVVGTPPEYMAPEQARGQE--VGPMTDLYALGVV  
108759164 KARRPHPGED-----ETAAGIVLGTTPAYMAPEQSAGQP--VDGRADYALAVT  
108760510 RITD---GAT-----RLTVQGAAGTTPRYMSPEQAMGLD--VDARADVYAVGIV  
116619999 KLVN---ETG-----DATENAEQLLTPNYASPEQFRGEA--QSTATDVYSLGAV  
32474038 RCRQNGSDVN-----GITGSAVVGTLRYMSPEQSLGKASFDHRADVYSLGVT  
32476260 KHTDADSS-----VTGSGAAVGTTPHYMAPEQALGHSDRVTHHSDIYSLGAI  
32473866 RVLNSNTDASAV-----DLTRAGLTLGTTPRYMSPEQIQGHK--VDGRSDLYSLGVT



108758216 RLMHEDDATAL-----GTESGAWVGTPSYMAPEQIRCRP--VDGRADIYSLGAC  
108759500 KVIDS-----QSVHTQGGILLGTPQYMAPEQATGKNGEVDPRDIFAFGCL  
108762243 KVLSS-----TTVQTQEATIIIGTPQYMSPEQAQGKNRDIDARTDVFALGCI  
116625893 KAADP--ISNAPAANSPTLTIRATQAGLIMGTAGYMAPEQAAGK--PVDRRADIWSFGVV  
116626707 KLMESESATSESAETVPMHEAGQTREGTVVGTAAAYMSPEQAEGK--PVDGRSDIFSFGAV  
29831643 RLADS-----PGLTRTHEFVGTTPAYVAPESAEGRP-QTS-AVDIYGAGIL  
32476268 RDQHS-----SDLTSQGLTVGTHAYMAPEQITGDE-AISGKADLYALGCV

: \*\* \*\*::

13092968 TYELLTGHTPFTGDS-ALSIAYQRLEIDVPRASTVITGVPO-QFDELVARATVRDPSGRY  
111018124 LFELLTGRTPFTGDT-SLSVAYQRINQDVPRPGSFIAGVPP-EFDELVAEATHREPSHRF  
19553377 LFELLTGTTPFSGED-DLDHAYARLTEVVPAPSSLIDGVPS-LIDELVATATSNPEDRF  
23493912 LFELLTGTTPFDGAD-DMDHAYARLTEVVPAPSSLIDGIPS-LVDALVATATSNPEDRF  
38234190 MFELLTGTTPFSGDN-QIAHAYARLDSAVPAPSSMIAGIPP-LIDALVASATALRPEERF  
91787132 LYQLLTGKRPFQDGT-DFVIIQQIVGHAAEAPTSFNRLPA-AIDAVVARALAKSPSQRF  
94971484 LYTVLMGFRPFQNG-ASTIGFKVINQHPLPITTFHLDLSK-DTEYVVARAMAKNPRDRY  
111019572 LHECLTGAIPFNS-ISSAIRAHLAAPAPRPSAVRPDIPA-AFDGVVATGLAKSRDARY  
126435989 LYECLTGKPPFETGA-LQQLMSAHMFAPPPRPSIMRRGISR-AFDDVIARGMAKQPGDRF  
21225517 LYEMATGVPPFDLGD-AWAILVGHRTPEPEPRTHRAELPR-YLDRIILDLLAKRPEQRP  
29827806 LYEIATGAPFDLDD-AWAILIGHRTPPDPPRGHRPELPA-YFEKIILDLLAKLPDERP  
86743110 AYECLAGRRPFDDRN-PIVVMAHQDTPPP---LPTDIPY-QVRALVDSAMAKDPARRP  
124268135 LYELLTGHRAFEGDSLAAITGAVCSFTP-PMADDEVSTAVPP-ALASIAARAMAKRPEDRP  
86159869 LWQMLTGELFPF----VVDGRSTVLDPGPPPRLPLEDAPP-ALASLLTAALSQAPTGRP  
108758255 LHQLITGRYPFQCED-RMELERLHLEAPAPRPS-AIAAVSP-AVDVAVLRCLEKDGSRRF  
108763488 TFEIVTGRLPFVGSS-PVDLLMKHVEARPPRPFSEFVSDLPP-ALDAFILQMLTKDPETRP  
108759164 AYYLSTGQLPFERGQ-MVELALGTGPVGAPPHLLVPGVPP-ALSEVLLRALSRRCEDRY  
108760510 LFELLTGQPFQDGN-VSEIMQKQVHQPMPRLAQVAADLQYPTVDAVIQKATAKRREERY  
116619999 LYKLLTGSAPREHAR-TGAMPEPAAPS-----RLNGDVPR-DVDFVVAKALRPEPEHRY  
32474038 LYEMLCG-----ERFDGSDPASVRRR--NPKVSRDLETVLIKSLAKEPAERY  
32476260 LFAAITSRPPIVGDTVMQTLKVAHQPPPTLRV--CPEAESDLEIVIVAKCLEKQPKDRY  
32473866 LYHLLAGQPPFDAEEPLALAVKHLHEMPQLDHARGSSDLPPWLVAITMRLLRKTPGERF  
108758216 LYQMVGTQRPIDVADNVALLSAVMHQVPAPLNGVR--TDVPDGFSSQVVARTLEKDPATRY  
108759500 VYEMLARLPRFRDNGNLPELIYRIVYDPPEPLEALVPLDPD-HVIAAVEKSLEKRPEDRF  
108762243 VYEMMAGKPVFG-SGSLAQMIFRVVYEPPEPLAPLCPPEATP-EAISAVMRALAKGVDERY  
116625893 LYEMLTGRMLFT-GETISHTLASVLKDR---INFaipNVPS-PICRLLARCLHRDPKERL  
116626707 LYELITGRPPFA-GGSALEVLHQHLSAE-PRRPSTVPDP----LWTVIERCLSKNPDRRP  
29831643 LYELITGRPPFA-GGSALEVLHQHLSAE-PRRPSTVPDP----LWTVIERCLSKNPDRRP  
32476268 LFEMLANRKVFA-GENFAQLFEQHLRKTAPTIASIVPDVPP-ELSQVIADCLEKSPDDRP

\*

13092968 ADAIEMAAQV-----  
111018124 ANAEQMGSALE-----  
19553377 DDSGEFLSALEDV----  
23493912 SDASEFLTAM-----  
38234190 ADAAEFLNAL-----  
91787132 STAREFNAL-----  
94971484 QNGAAF-----  
111019572 RTAGALAAAARAAL---  
126435989 PTAGDLAKA-----  
21225517 DDAGELGRI-----  
29827806 HDARELARRI-----  
86743110 SSAGAFARSAAGIRSL  
124268135 RSARALSRDLHEWL---  
86159869 QTALGLL-----  
108758255 GSVTAFLAAL-----  
108763488 NSADALRQQL-----  
108759164 ATALEFKEALLL-----  
108760510 ATMEAFASDLV-----  
116619999 ASVDEFANDV-----  
32474038 SAAGDLAEDL-----  
32476260 KTAKNLADDL-----  
32473866 ASAMELLDVI-----  
108758216 ADSHELAQALEHWI---  
108759500 PDVASFI-----

|           |                |
|-----------|----------------|
| 108762243 | PDVSSFI-----   |
| 116625893 | RDIGEVRIV----- |
| 116626707 | QHMEDL-----    |
| 29831643  | SAENLARAL----- |
| 32476268  | F-----         |

Cluster No. 71 multiple sequence alignment

CLUSTAL 2.0.10 multiple sequence alignment

```
13881827      YRIERMLGAGGMGTVYLARNPDLRSEALKVLAELSRDLDFRARFVREADVAAGLDHPN
31793271      YRIERMLGAGGMGTVYLARNPDLRSEALKVLAELSRDLDFRARFVREADVAAGLDHPN
1370255       YRIERMLGAGGMGTVYLARNPDLRSEALKVLAELSRDLDFRARFVREADVAAGLDHPN
54022822      YRVIQVLGSGGMGTVYLAQNPIPRRDALKVLSADLSTDDDFRARFEREANLAAGLDHPN
54026639      YTIERLLGRGGMGSVYLARHPRLPRWTALKLLNRELFHDTEIRARFEREADLVAQLDHPN
54026640      YVIERQLGRGGMGSVYLAKHPRLPRMTALKLLNREMFDNKEVRRARFEREADLVARLDHPN
54026222      FTVERLLGQGGMGSVYLARHPRLGKLTALKLLNPELFTDRQVRARFDREADLAAQLDHPG
54026641      YEIKRVLGQGGMGTVYLARHPRLPRLTALKLLARELYTDAEIRGRFEREADLVAQLDHPN
111017527     YTIQVRLGVGGMGAVYLARDPHLPRNTALKLLDRSLTTDDCFRFRFELEADHAARLEHPN
111025322     YTIERVLGVGGMGTVYAAAHPRLPRRIALKVLPALAEEDDARSRFELEADHAARLEHPN
111026929     YTIERVLGTGGMGTVYLARHGSLPRGVAVKVLGDG--TADDYVRRARFVREAHAARLEHPN
54024394      FRIERTLGSGGMGTVYLARHPRLPRSVALKVLDAAAGADPEFRARFAREADIAVRLDHPH
54024395      YRIVRRLGAGGMGTVYLAEHPRLRPRDAVKVLDPELGADPGYRARFEREAELAARLEHPN
2131011       FTIVRQLGSGGMGEVYLARHPRLPRQDALKVLRADVSADGEYRARFNREADAAAASLWHPH
13881433      FTIVRQLGSGGMGEVYLARHPRLPRQDALKVLRADVSADGEYRARFNREADAAAASLWHPH
31792934      FTIVRQLGSGGMGEVYLARHPRLPRQDALKVLRADVSADGEYRARFNREADAAAASLWHPH
120406577     YTIVRMLGSGGMGKVYLAKHPRLPRYDALKVLSTTVCADSEYRERFHFREADIAATLWHPH
145221764     YTISRMLGAGGMGEVYLAKHPRLPRYDALKVLSSASVSTSEYRERFNREADIAASLWHPH
126437951     YTIMRSLGHGGMGGEVYLAQHPRLPRQDALKVLTAAVSADDEYRQRFQREADIAATLWHPH
145224013     YTIVRLLGSGGMGEVYLAQHPRLPRRDALKVLPAAVSADVEYRKRFFEREADIAATLWHPH
126437262     YTIVRVLGTGGMGGEVYLAQHPRLPRQDALKVLPAFSADDEYRHRFSREADLAAALWHPH
126433399     YTIIRMLGSGGMGEVYLAQHPRLPREDALKVLKSSIADPDFVERFNREADLAAKLWHPH
41407430      YTIIRQLGAGGMAEVYLAHPRLPRRDVIKVLAEAVTVDFEYRERFNREADLAAATLWHPH
3261603       YTVVRMLGCSAMGEVYLVQHPGFPGWQALKVLSPAMAADDEFRRRFQRETEVAARLFHHPH
2078052       YQLLRLLGRGGMGGEVYEAEDTRKHRVVALKLI SPOYSDNAVFRARMQREADTAGRLTEPH
13880519      YQLLRLLGRGGMGGEVYEAEDTRKHRVVALKLI SPOYSDNAVFRARMQREADTAGRLTEPH
41409485      YRLVRLLRQGGMGGEVYEAEDTRKHRLVALKLI SQQFSGNPEFSARLQREADIAGRLTEPH
3261596       YHLKRLLRGGMGGEVYEAHTVKEWTVAVKLMTAEFSKDPVFRERMKREARIAGRLQEPH
13880901      YHLKRLLRGGMGGEVYEAHTVKEWTVAVKLMTAEFSKDPVFRERMKREARIAGRLQEPH
31792458      YHLKRLLRGGMGGEVYEAHTVKEWTVAVKLMTAEFSKDPVFRERMKREARIAGRLQEPH
41408602      YHLKRLLRGGMGGEVYEAHTVKEWTVAVKLLNESFSDPVFRERMKREARTAGRLQEPH
111026927     YHLKRLLGKGGMGGEVYAYDLDDKDRTVALKLLPDALADDP IFRERLRRESHAAARLQEPH
120405645     YRLRLLLGKGGMGGEVYEAEDTVKDRVVALKLLPEAVSHDPVFRKRLQREAHAAAGRLQEPH
145222614     YRLQRLLGKGGMGGEVYAYDTVKDRVVALKLLPESASHDPVFRKRLQREAHAAAGRLQEPH
134097872     YRVEGLIARGGMGEVLRAYDTRHDRVVALKVLGSGVAADPEYRERFKREALAAARLREPH
134099731     YRVEGLIARGGMGEILRAYDTRHDRVVALKLLAENLAADDEFRERFKREAHAAARLREPH
120402081     YELQSVIGVGGMGGEVYRAYDTARERMVAIKLLRPEMAADHSFQERFRRESRVAARLQEPH
: : : ..* : . . . : : : : : * : * : . * .*
```

```
13881827      IVAVHQRGQFEGRLWIAMQFVDG-GNAEDALR--AATMTTARAVYVIGEVAKALDYAHQQ
31793271      IVAVHQRGQFEGRLWIAMQFVDG-GNAEDALR--AATMTTARAVYVIGEVAKALDYAHQQ
1370255       IVAVHQRGQFEGRLWIAMQFVDG-GNAEDALR--AATMTTARAVYVIGEVAKALDYAHQQ
54022822      IVAVYNRGEEDGQLWIAMQYVDGTDAAEEAAKG-PSVMTPQRALRIVSEVGKGLDYAHRR
54026639      IVTVFDRGVDDEQLWISMRIDG---TDAALD-VATLPPWRAVQIVGETAKALDFAHAR
54026640      IVTVYDRGLEDEQLWISMQYIDG---VDAASVD-PQTLPPARAVQIVKETADALDYAHSM
54026222      IVAVYDRGSENHQLWISMQYVDG---VDAASVN-PLTLPPERAVQIIEGVADALDYAHGR
54026641      IVTVYDRGAEDEQLWISMQFVPG---SDAAAAD-IDVLAPGRAVQIIEGVAAAALDFAHAN
111017527     IVSVFDRGREANQHWIAMQYVAG--TDAVALR-EGPMDPPRAVHIVAETAKALDYAHEN
111025322     IVAVYDRGREGDRLWIAMQYVDG--TDAETARE-GAPLDPARAVRIITETAKALDYAHEA
111026929     IVTVYDRGCEGDRLWIAMQYVAG--TDAATLLR-RGPLPDLAVHIVAEIGQALDFAHEH
54024394      VVEIYDRGAEDERLWISMRVAGPDAARLIR-E-RGRLPARRAVGLVAQAAAAGLDAHRR
54024395      VVAVYDRGREGEFLWIAMRYVDGVDAGELVAEE-PAGLPAERAVGIVAAAARGLDAHRR
2131011       IVAVHDRGEFDGQLWIDMDFVDGDTVSLLRDRYPNGMPGPEVTEIITAVAEALDYAHER
13881433      IVAVHDRGEFDGQLWIDMDFVDGDTVSLLRDRYPNGMPGPEVTEIITAVAEALDYAHER
```

31792934 IVAVHDRGEFDGQLWIDMDFVDGTDTVSLLRDRYPNGMPGPEVTEIITAVAEALDYAHER  
120406577 IVAVHDRGEYEGRLWISMDHVEGTDAWLLAERYPHGMPPALVIRIVTAVGEALDYAHQR  
145221764 IVQVHDRGEFEGRLWISMDHVEGTDAARLLAERYPDGMPPALVARLVAVTAVGEALDYAHQR  
126437951 IVSVHDRGDFDGLLWISMDFVQGTDAARLLAERYPNGMPPDVVRIITAVASALDHAHER  
145224013 IVGVHDRGEDAGRIWISMDYVEGADAAHLLAEDYRTGLPVAEVAQIVTAVADALDYAHDR  
126437262 IVGVHDRGEYDGRWLWISMDFVDGHDAAARLLVDRYPNGLPAADVIEIVTAVADALDYAHQR  
126433399 IVGIHDRGRYRGRWLWISMDFVDGTDVGRLLQOKYPDGMPPADDALEIVEAVASALDYAHSR  
41407430 IVGVHDRGEFNGHLWISMDYVEGTASRLVKESYPDGMPLDEVSAIVQAVAGALDYAHAR  
3261603 ILEVHDRGEFDGQLWIAMDYVDGIDATQHMDRFPVAVLPVGEVLAIVTAVAGALDYAHQR  
2078052 IVPIHDYGEINGQFFVEMRMIDGTSRLRLLKQY--GPLTPARAVAIVRQIAAALDAAHAN  
13880519 IVPIHDYGEINGQFFVEMRMIDGTSRLRLLKQY--GPLTPARAVAIVRQIAAALDAAHAN  
41409485 VVPIHDYGEIDGRFFVEMRLVDGIDLGSLLHRE--GPLAPPRAIAIIRQVAAALDAAHAA  
3261596 VVPIHDYGEVDGQMFLEMRLVEGTDLDSVLKRF--GPLTPPRAVAIITQIASALDAAHAD  
13880901 VVPIHDYGEVDGQMFLEMRLVEGTDLDSVLKRF--GPLTPPRAVAIITQIASALDAAHAD  
31792458 VVPIHDYGEVDGQMFLEMRLVEGTDLDSVLKRF--GPLTPPRAVAIITQIASALDAAHAD  
41408602 VVPVHDYGEIDGQMFLEMRLVEGTDLDSVLKRF--GPLPPRAVAIITQIASALDAAHAA  
111026927 VVPIHDYGEVNGVLYIDMRLVQGTDLRSLTRY--GPLAPPRAVAIISQIAAALDAAHAD  
120405645 VVPIHDYGEVDGLLFVDMRLIDGTDLRKLLKEQ--GPMTPARATAIVAQVASALDAAHQN  
145222614 VVPIHDYGEIDGLLFVDMRMIDGVDLRRILKEQ--GAMSPARATAIVRQIASALDAAHRA  
134097872 VIPIHSFGEIDGRLYLDMRLIEGQDVSRLAAH--GMPPPADAAEVVHQIAQALDAAHEE  
134099731 VIPIHAYGEIDGRLYLDMRLVEGGDVGSLLASR--GMPRPAEAVGVIEQVARALDAAHAE  
120402081 VIPVHDFGEIDGVLYIDMRLVEGASLKDVLRAE--GALPPARAVSILRQVAAALDAAHAN  
: : . \* : : \* : \* : . : : . . \*\* \*\*

13881827 GVIHRDIKPANFLLSRAAGGDE----RVLLSDFGIARALGDTG---LTSTGSVLATLAYA  
31793271 GVIHRDIKPANFLLSRAAGGDE----RVLLSDFGIARALGDTG---LTSTGSVLATLAYA  
1370255 GVIHRDIKPANFLLSRAAGGDE----RVLLSDFGIARALGDTG---LTSTGSVLATLAYA  
54022822 GLLHRDVKPANFLLSAVDGDDEE----RVLLTDFGVAKSAEDGQD--LTATGNFMATVAYA  
54026639 GVLHRDVKPANILLERAEPGVGE---RVYLTDFGIARLRDDTGH--LTRTGTFTATLafa  
54026640 GVLHRDVKPANILLARSTGGRGE---RVYLTDFGIARLRDDTGH--LTQTGTFTATLaya  
54026222 GVLHRDVKPKNILLARASAGQGE---RVFLSDFGIARLRDDTTH--LTQTGMFTATLaya  
54026641 GVLHRDVKPANILLAKAPIGQPE---RVLLTDFGIAGVRDADTT--LASGDTITATLaya  
111017527 GVLHRDVKPANILLGMSGAGQPE---RVLLTDFGIAKALDETOH--LTRTGLSVATLQYS  
111025322 GVLHRDVKPANILLEHPRPGHPGDPGRVLLADFGIAKALEHTQH--LTKTGMLVASLQYA  
111026929 GILHRDVKPANVLLAG--RPAAGGVVVRVLLTDFGIAKNLDETRR--LTRTGMVATLVYA  
54024394 GLLHRDVKPANLLVAADDDGGD---HVFLVADFGIARSRDDAVR--LTGAGALPATLGYV  
54024395 GLLHRDVKPANILVSTDDDGAD---VVRLTDFGIARSLDAAA---TTSGSVLASFAYA  
2131011 RLLHRDVKPANILIANPDSADR---RIMLADFGIAGWVDDPSG--LTATNMVGTVSYA  
13881433 RLLHRDVKPANILIANPDSADR---RIMLADFGIAGWVDDPSG--LTATNMVGTVSYA  
31792934 RLLHRDVKPANILIANPDSADR---RIMLADFGIAGWVDDPSG--LTATNMVGTVSYA  
120406577 GLLHRDVKPANILIADPETENE----RIMLADFGIARRVGEVST--LTGTSMTVGTVAYS  
145221764 GLLHRDVKPANILIADPETENE----RIMLADFGIARRVGEVSA--LTGTMVGTVAYS  
126437951 GLYHRDVKPANILIANPGSPDE----RAMLADFGIARQAGDASG--LTGTMVGTVAYS  
145224013 HLLHRDVKPANILIARPDSNTR---RIMLADFGIARWDNDISG--LTATNMVGTVSYA  
126437262 QLLHRDVKPANILITGPDRARR---RILLADFGIARHTEDNTG--LTSSNIAVGSMSYS  
126433399 GLLHRDVKPANILIADVENDER---RILLGDFGVARDLADDAGGLTQTNMVTGTAAYA  
41407430 GLLHRDVKPANILLTHPEAGER---RILLADFGVARHLGDISG--ITETNAVGTVAYA  
3261603 GLLHRDVPANVVLTSQSAGDQ---RILLADFGIASQP-----SYP  
2078052 GVTHRDVKPENILVTASD-----FAYLVDFGIARAASDPG---LTQTGTAVGTYNM  
13880519 GVTHRDVKPENILVTASD-----FAYLVDFGIARAASDPG---LTQTGTAVGTYNM  
41409485 GVTHRDVTPGNILVTPSD-----FAYLADFGIARAASDPG---LTQVGTAI GTYYM  
3261596 GVMHRDVKPQNILITRDD-----FAYLVDFGIASATTDEK---LTQLGTAVGTWKYM  
13880901 GVMHRDVKPQNILITRDD-----FAYLVDFGIASATTDEK---LTQLGTAVGTWKYM  
31792458 GVMHRDVKPQNILITRDD-----FAYLVDFGIASATTDEK---LTQLGTAVGTWKYM  
41408602 GVMHRDVKPQNILVTRDD-----FAYLVDFGIASATTDEK---LTQLGTAVGTWKYM  
111026927 KLVHRDVKPENVLVTRED-----FAYLVDFGIANTATDEK---LTTLGTAVGTYDYM  
120405645 GIMHRDVKPENILINRDD-----FAYLVDFGIANAATDEA---LTELGTAVGTYAYM  
145222614 GIMHRDVKPENILVTRDD-----FAYLVDFGIANAATDES---LTELGTAVGTYAYM  
134097872 GLVHRDVKPSNIIIGRGG-----FAYLVDFGIAHWAGNRTS--LTTTGTAVGTLDYM  
134099731 GLVHRDVKPSNILLGDGG-----FAYLVDFGIAHSVQAGT---LTSTGFTVGTLDYM  
120402081 GLVHRDIKPENVLLTPDD-----FAYLVDFGIAHGGEAS---VTSTGLVVGSSAYM  
: \*\*\*:.\* \*.: : : : \*\*\*:\*

13881827 APEVLG--QGFDRADLYSLGCALFRLLTGEAPFAAGAGAAVAVVAGHLHQPPPTVSDR

31793271 APEVLG--QGF DGRADLYSLGCALFRLTGEAPFAAGAGAAVAVVAGHLHQPPPTVSDR  
1370255 APEVLG--QGF DGRADLYSLGCALFRLTGEAPFAAGAGAAVAVVAGHLHQPPPTVSDR  
54022822 SPEQLL--ERLDHRSDIYSLGCSFYRMLTGQNPFFS--TVPVAVMMGHLHEAPPKPSAA  
54026639 SPEQLS--APLDHRSDQYSLACTLFRLLTGTVPFAA--DNPVAVIGGHLHRPPAAAEL  
54026640 SPEQLT--ASLDHRSDQYSLACSLFWLFTGSGPF--TNPAQVIQGHLOQAPPALSSA  
54026222 SPEQMT--APLGNRSDQYSLACALYWLLVGVGPFDA--ANPADIHGHNLNAPVPSVR  
54026641 APEQLS--HTLDHRADQYSLACTLFRLLTGSVPPFG--ANPAVVLNHLFGPPPSARAL  
111017527 APEAFQ--IPLDLRADVYSLGCTLFRLLTGHPPFTG--ST-QEVMRGLHCGPVPRISAV  
111025322 APEQFAS--IPLDARADVYSLGCTLFRLLTGOQPYPG--STLAQLMAGHLNSPIRPAAL  
111026929 APEALVAG--VELDPRADVYSLGCMFLQLLTGRLPYSG--SA-AAVVDAHLNQPIPRPTVL  
54024394 APEQIDG--REPDHRSDLYSLGVTLYQMLTGALPFTG--TTPAELLRAHLLLEPPPVTRR  
54024395 APETFAG--GPLDARTDVYALGCTLYEMLTGAVPFAR--RSPAAAMQAHLYEPPPRPSAT  
2131011 APEQLMG--NELDGRADQYALAATAFHLLTGSPPFQH--ANPAVVISQHLSASPPAIGDR  
13881433 APEQLMG--NELDGRADQYALAATAFHLLTGSPPFQH--ANPAVVISQHLSASPPAIGDR  
31792934 APEQLMG--NELDGRADQYALAATAFHLLTGSPPFQH--ANPAVVISQHLSASPPAIGDR  
120406577 APEQLTAD--EHIDGRADQYALAATAFQLLTGSPPFQH--SNPAIVISQHLTAQPPSISVH  
145221764 APEQLTAD--EAIDGRADQYALAATAFQLLTGKAPFQH--SNPAIVISQHLTAQPPSIAVH  
126437951 APEQLRG--DHIDGRADQYALAATAAYQLLTGTPPFTH--TNPAVVISAHLTSDPPVIGDV  
145224013 APEQLMG--QDL DGRADQYALAATAFHLLTGSPPFSH--SNPAVVISRHLNSAPATVAAH  
126437262 APEQLMG--HPIDGRADQYSLAATAAYRLFTGSPPFPH--SNPAVVISHHLNTPPRLGDT  
126433399 APEQLMG--LDVDGRTDQYSLAVTAFHMLTGAPPFQN--SRPTVVVGQHLNTPPPLADT  
41407430 APEQLTG--SPIDGRADQYALAATAFHLLTGAAPPFQH--SNPIAVIGQHLHEDPPRLSDF  
3261603 APELSAG--ADVDGRADQYALALTAIHLFAGAPPVDR--SHTGPLQ-----PPKLSAF  
2078052 APERFTGD--EVTYRADIYALACVLGECLTGAPPYRA--DSVERLIAAHLMDPAPQPSQL  
13880519 APERFTGD--EVTYRADIYALACVLGECLTGAPPYRA--DSVERLIAAHLMDPAPQPSQL  
41409485 APERFTDD--EVTNSVDIYSLACVLTECLTGAPPYRA--DTVERLVA AHLTKTAPPLSQL  
3261596 APERFSND--EVTYRADIYALACVLHECLTGAPPYRA--DSAGTLVSSHLMGPIQPQSAI  
13880901 APERFSND--EVTYRADIYALACVLHECLTGAPPYRA--DSAGTLVSSHLMGPIQPQSAI  
31792458 APERFSND--EVTYRADIYALACVLHECLTGAPPYRA--DSAGTLVSSHLMGPIQPQSAI  
41408602 APERFSDA--EVTYRADIYALACVLFECLTGAPPYRA--DSAGVLVSAHVMDPIPAPSAR  
111026927 APERFEGDGSEVTYRADIYSLACVLHECLTGAPPYPA--DSIRVKISSHLFEPVPRPSVA  
120405645 APERFTNG--EVTHRADVYALTCVLHECLTGAQPFQ--DSVSVVITAHLN DPAPRPSQS  
145222614 APERFAAG--EVTHRADVYALTCVLHECLTGTQPFEG--DSVSVVITAHLNQAPRPSL  
134097872 APERFGDG--PVDHRADVYSLACVLYQCLTGAKPYAG--HTAESLINAHLNRPVPRPSSH  
134099731 APERFDDA--PVDHRADVYSLACVLYQCLTGAKPFSG--DTAASLINAHLNHPPLPSSA  
120402081 APERFSGE--RGGPASDVYSLACLLESLYGRAPFEA--ADVRQVWSAHMFAPVPRPSIM

: \*\* \* \* : \* \*

13881827 VPG-LSAAMD AVIATAMAKDPMRRFTSAGEFAHAAAAALYG-  
31793271 VPG-LSAAMD AVIATAMAKDPMRRFTSAGEFAHAAAAALYG-  
1370255 VPG-LSAAMD AVIATAMAKDPMRRFTSAGEFAHAAAAALYG-  
54022822 RPG-LPPALDAVMKVLAKNPADRYASCREFVQD-----  
54026639 RPG-LPAAIDAVLARALAKDPRDRFATCLEFVDAAWR-----  
54026640 RPG-LPYALDGV LAKAMAKRPEDRF DSCSEFAAAAQAAL---  
54026222 RPG-LNPALDAVLAAGLAKHPDHRYRTCTEFATAARKAL---  
54026641 NPA-LPPALDAV LARAMAKLPADRFASCAEFAGAARHAL---  
111017527 RGD-LPPTFDDIVSAALTKRREDRLPSCHALSAG-----  
111025322 RAG-LPTGFDAVITRAMAKDREHRYPSGALAAAAQHALL---  
111026929 RPS-LPDAMPVIRQALAKDRDTRFDSCGALAQAAARSAL---  
54024394 AAD-LPRALDDVLATALAKDPAERYPDCRALAAAAAAL---  
54024395 HPA-LA-AFDPVIARALAKVPAHRYGSCGELARAATAAL---  
2131011 VPE-LT-PLDPVFAKALAKQPKDRYQRCVDFARALGHRLG--  
13881433 VPE-LT-PLDPVFAKALAKQPKDRYQRCVDFARALGHRLG--  
31792934 VPE-LT-PLDPVFAKALAKQPKDRYQRCVDFARALGHRLG--  
120406577 RPE-LS-SLGM AFEKALAKSPADRFDRCVDF-----  
145221764 RPE-LS-GLGAAFQKALAKSPADRYDRCVDFARALS NRSTV-  
126437951 RPE-LS-GLGPVFGRALAKSPDKRFERCVDFALEH-----  
145224013 RPE-LA-AVDPV LTRALAKNPADRYPRCADF-----  
126437262 RPE-LR-AFDAAMARALAKDPAARFGSCHDFA-----  
126433399 HPE-LA-PLDAAMQALAKNPDERFDCTEFARAL-----  
41407430 RPE-LA-GLDEVFCQALAKAPEDRFDRCFARAAA V-----  
3261603 RPD-LA-RLDGVLSRALATAPADRFSGSCREFADAM-----  
2078052 RPRVPPALDQVI AKGMAKNPAERFMSAGDLAIAAHDALTT-  
13880519 RPRVPPALDQVI AKGMAKNPAERFMSAGDLAIAAHDALTT-

41409485 RPGAFPPALDRVIAKGMAKRPEDRYRTAGEFAAAAHEALTT-  
3261596 RPG-IPKAFDAVVARGMAKKPEDRYASAGDLALAAHEALSD-  
13880901 RPG-IPKAFDAVVARGMAKKPEDRYASAGDLALAAHEALSD-  
31792458 RPG-IPKAFDAVVARGMAKKPEDRYASAGDLALAAHEALSD-  
41408602 RPG-VPKAFDAVIARGMAKKPEDRYASAGDLALAAKEAL---  
111026927 RPG-VPAGFDAIIARGMAKSPQDRYATAGDLALAAHDALSAG  
120405645 RPG-IPAGLDDVISRGMAKRPEDRYASAGEMARAATAAL---  
145222614 RQG-IPAGLDEVIARGMAKRPEDRFASAGELADAATDAL---  
134097872 NPA-LA-AFDRVVETGMAKDPRRRFATAGEFARAARQAL---  
134099731 RSD-VPREFDRIVARGMAKNPAERFSSAGELARAARQALTTM  
120402081 RRG-VSRTFDDVVARGMAKQPHDRYPTAGELARA-----  
                  . . . : : . \* . :

Cluster No. 72 multiple sequence alignment

CLUSTAL 2.0.10 multiple sequence alignment

```
108757646      WSVVRELGNNGFAVVYLVEKHGLRCALKLARHRDSSGDDKQTHARTLRELSALLLLDHPN
108763095      WSVVREIGNNGFAVVYLVEKHGRRCALKLARHRDSSGDDKQTHARTLRELSALLLLDHPN
108762185      WRVIRELGNNGFAVVFLVEKHGRRSALKVARHRDSSGDEKQTHARTLRELAALLLLDHPN
108763545      WRVIKEIGNNGFAVVFLVEKNGRRSALKLARHRDSSGDDKQTHARTLRELSALLLLGHPN
* *::*:*****:*****:* *.***:*****:*****:*****:*****.***

108757646      IVKHRGYGYSEQGNVYLALAYVDGWTLAEWAERKHPTVQEVLVHFDKISAALSYMHGGRV
108763095      IVKHRGYGYSEQGNVYLALAYVEGWTLAEWAERKHPTVQEVLVQVFDKISAALSYMHGGRV
108762185      IVKHRGYGYSEHGNVYLALAYIDGWTLAEWAERKHPTVREVLQVFDKLCALSYSMHSRGV
108763545      IVKHRGYGYSEHGNVYLALAYIDGWTLAEWAERKHPTVREVLQVFDKLCALSYSMHSRGV
*****:*****:*****:*****:*****:*****:*****.***

108757646      LHRDLKLSNVLIRKSDGEPVIIDFSCASYSLAEELTDWGLPPGTDRFRAPEQFTWLREHK
108763095      LHRDLKLSNVLIRKSDGEPVIIDFSCASYSLAEELTDWGLPPGTDRFRAPEQFAWLREHK
108762185      LHRDLKLSNVLIRKSDGEPVIIDFSCANYSLAEELTDAGLPPGTDRFRAPEQFQWLREHK
108763545      LHRDLKLSNVLIRKSDGEPVIIDFSCANYSLAEELTDAGLPPGTDRFRAPEQFKWLREHK
*****:*****.***** ***** *****

108757646      AEQRAKYAFQVADEIFAVGAMLYELLTDPRPTEVQARVTLNSTVMKPPPARALNVRVPEA
108763095      AEQRAKYAFRVADEIFAVGAMLYELLTDPRPTEVQARVTLNSTVMKPPPARALNVRVPEA
108762185      AEHRAKYAFQVADEIFAIGAMLYELLTDPRPTEIQARFSLNSTVALPPPARALNVRVPEA
108763545      AEHRAKYAFRVADEIFAVGAMLYELLTDPRPTEIQARFSLNSTVILPPPARALNGRVPEA
**:*:*:*:*:*:*:*:*:*:*:*:*:*:*:*:*:*:*:*:*:*:*:*:*:*:*:*:*

108757646      LNDLVDCILSREPARRPVDTEALRRELG
108763095      LNDLVDCILSRDPAKRPVDSEALRRELG
108762185      LNDLVASVLSRDPKRPVDTEALRRELG
108763545      LNDLVASILSREPAPKRPVDTEALRRELG
***** .:*:*:*:*:*:*:*:*:*:*
```
